# Supplementary material for: Single-cell transcriptomics identifies Keap1-Nrf2 regulated collective invasion in a Drosophila tumor model
Source: eLife. 2022 Nov 2;11:e80956. doi: 10.7554/eLife.80956 (PMC9708074; doi:10.7554/eLife.80956)
Supplement: Figure 1—figure supplement 3—source data 1. — Related to Figure 1—figure supplement 3B. [file elife-80956-fig1-figsupp3-data1.xlsx]

## Sheet: DGEgenes
Figure 1 – figure supplement 3 – source data 1: Cluster-specific markers of the tjTS>lglRNAi (72h) scRNA-Seq dataset.
	p_val	avg_logFC	pct.1	pct.2	p_val_adj	cluster	gene
Col4a1	3.60128e-149	0.32852	0.95	0.823	5.02306e-145	0	Col4a1
stg	5.83844e-128	0.452331	0.64	0.413	8.14346e-124	0	stg
Obp99a	1.21922e-120	0.513829	0.486	0.274	1.70057e-116	0	Obp99a
CG8036	1.68401e-110	0.308949	0.911	0.812	2.34886e-106	0	CG8036
Vm26Ab	0	1.87587	0.83	0.299	0	1	Vm26Ab
Yp3	0	1.75641	0.992	0.745	0	1	Yp3
Yp2	0	1.33271	0.991	0.894	0	1	Yp2
Yp1	0	1.23842	0.985	0.793	0	1	Yp1
sad	0	0.908182	0.801	0.338	0	1	sad
CG7675	0	0.756461	0.576	0.207	0	1	CG7675
CG4325	0	0.623128	0.725	0.306	0	1	CG4325
Rtnl1	0	0.622057	0.954	0.752	0	1	Rtnl1
Tapdelta	0	0.6202	0.989	0.895	0	1	Tapdelta
Sec61beta	0	0.615887	0.985	0.871	0	1	Sec61beta
Iris	0	0.596324	0.864	0.484	0	1	Iris
CG5885	0	0.5932	0.96	0.757	0	1	CG5885
CG13998	0	0.326796	0.279	0.038	0	1	CG13998
l(1)G0320	8.96504e-301	0.543563	0.937	0.691	1.25044e-296	1	l(1)G0320
Sec61gamma	1.74144e-289	0.503163	0.947	0.758	2.42896e-285	1	Sec61gamma
emc	2.89246e-288	0.600925	0.858	0.53	4.03441e-284	1	emc
CG10407	1.80743e-283	0.396964	0.323	0.069	2.521e-279	1	CG10407
CG32276	3.76233e-265	0.475221	0.954	0.812	5.2477e-261	1	CG32276
Vm26Aa	1.80326e-240	1.19675	0.384	0.115	2.51519e-236	1	Vm26Aa
CG9427	2.32868e-230	0.376542	0.305	0.075	3.24805e-226	1	CG9427
Hsc70-3	1.90919e-222	0.406136	0.972	0.861	2.66294e-218	1	Hsc70-3
CG42336	7.51575e-218	0.436485	0.948	0.787	1.0483e-213	1	CG42336
SsRbeta	2.60482e-192	0.437682	0.711	0.391	3.6332e-188	1	SsRbeta
Sec61alpha	7.34401e-191	0.407808	0.934	0.754	1.02434e-186	1	Sec61alpha
CG13992	2.09748e-185	0.350025	0.514	0.215	2.92557e-181	1	CG13992
Cyp18a1	1.74322e-182	0.34638	0.662	0.33	2.43145e-178	1	Cyp18a1
phm	4.8219e-174	0.320594	0.311	0.095	6.72559e-170	1	phm
Inx7	9.96039e-173	0.47183	0.52	0.239	1.38928e-168	1	Inx7
CG7322	1.39526e-164	0.451467	0.679	0.378	1.94611e-160	1	CG7322
bnb	1.89276e-158	0.402947	0.386	0.149	2.64002e-154	1	bnb
Spp	8.16797e-152	0.393002	0.774	0.504	1.13927e-147	1	Spp
CG9331	8.92253e-148	0.325142	0.431	0.184	1.24451e-143	1	CG9331
CG33169	3.57742e-144	0.308069	0.413	0.171	4.98979e-140	1	CG33169
CG5112	5.29113e-141	0.374535	0.686	0.411	7.38007e-137	1	CG5112
CG3902	9.25098e-137	0.377299	0.801	0.546	1.29033e-132	1	CG3902
Pdi	6.03875e-133	0.304548	0.959	0.863	8.42285e-129	1	Pdi
Pino	2.23466e-127	0.345369	0.523	0.264	3.1169e-123	1	Pino
CG4666	1.3152e-121	0.333681	0.697	0.43	1.83445e-117	1	CG4666
Mal-A5	1.29183e-111	0.292464	0.384	0.174	1.80185e-107	1	Mal-A5
CG5326	1.2264e-109	0.268326	0.373	0.164	1.71059e-105	1	CG5326
Spase25	1.41504e-107	0.320854	0.821	0.609	1.97369e-103	1	Spase25
laza	3.82519e-107	0.277991	0.391	0.18	5.33538e-103	1	laza
veil	2.15389e-104	0.307188	0.758	0.501	3.00425e-100	1	veil
twr	1.71016e-102	0.292444	0.874	0.686	2.38533e-98	1	twr
eca	6.75712e-101	0.285408	0.889	0.73	9.42484e-97	1	eca
Tudor-SN	2.74438e-94	0.29292	0.702	0.461	3.82786e-90	1	Tudor-SN
scf	5.91657e-88	0.260264	0.925	0.769	8.25243e-84	1	scf
CG17124	2.56039e-86	0.310983	0.589	0.361	3.57123e-82	1	CG17124
CG8860	3.9237e-86	0.272432	0.793	0.587	5.47278e-82	1	CG8860
Ufm1	3.38403e-80	0.260973	0.601	0.381	4.72005e-76	1	Ufm1
ogre	8.01061e-79	0.264798	0.594	0.369	1.11732e-74	1	ogre
Spase22-23	1.46161e-78	0.266145	0.77	0.556	2.03866e-74	1	Spase22-23
Spase12	5.22645e-77	0.260567	0.743	0.529	7.28985e-73	1	Spase12
CG11200	2.92077e-74	0.269368	0.643	0.427	4.07389e-70	1	CG11200
GstS1	2.29953e-68	0.26102	0.471	0.279	3.20738e-64	1	GstS1
Iris1	1.40374e-186	0.515387	0.79	0.5	1.95793e-182	2	Iris
CG9953	8.14218e-166	0.459307	0.892	0.715	1.13567e-161	2	CG9953
Yp11	1.22028e-160	0.372752	0.948	0.801	1.70205e-156	2	Yp1
Yp21	5.66343e-142	0.349288	0.963	0.9	7.89935e-138	2	Yp2
Tapdelta1	1.74088e-141	0.320786	0.969	0.899	2.42819e-137	2	Tapdelta
Rtnl11	1.49623e-123	0.349945	0.911	0.761	2.08694e-119	2	Rtnl1
Sec61beta1	6.36473e-123	0.303528	0.955	0.876	8.87752e-119	2	Sec61beta
Nop56	7.04866e-121	0.333412	0.937	0.799	9.83147e-117	2	Nop56
hoip	8.06535e-120	0.30461	0.987	0.918	1.12496e-115	2	hoip
CG11267	3.27218e-117	0.265821	0.995	0.959	4.56403e-113	2	CG11267
CG58851	4.45225e-114	0.315004	0.92	0.765	6.21e-110	2	CG5885
CG53261	1.36492e-113	0.315707	0.376	0.167	1.90379e-109	2	CG5326
NHP2	1.24446e-106	0.334598	0.881	0.691	1.73577e-102	2	NHP2
emc1	2.09587e-99	0.384006	0.749	0.549	2.92332e-95	2	emc
CG43156	1.04174e-97	0.4095	0.691	0.469	1.45302e-93	2	CG43156
eEF1delta	9.85912e-93	0.290302	0.924	0.818	1.37515e-88	2	eEF1delta
CG423361	1.13697e-92	0.295569	0.913	0.794	1.58585e-88	2	CG42336
Sec61alpha1	4.43436e-85	0.286342	0.888	0.763	6.18505e-81	2	Sec61alpha
CG73221	2.18864e-82	0.315019	0.607	0.392	3.05272e-78	2	CG7322
Sec61gamma1	1.06873e-77	0.272424	0.891	0.768	1.49066e-73	2	Sec61gamma
CG15529	1.45576e-69	0.347032	0.557	0.368	2.0305e-65	2	CG15529
Shmt	1.14335e-67	0.264659	0.801	0.651	1.59474e-63	2	Shmt
CG39021	3.16528e-65	0.277937	0.731	0.559	4.41493e-61	2	CG3902
CG112001	7.89345e-61	0.272981	0.613	0.434	1.10098e-56	2	CG11200
CG51121	8.98024e-58	0.271145	0.597	0.427	1.25256e-53	2	CG5112
Pino1	2.2714e-44	0.254668	0.424	0.281	3.16814e-40	2	Pino
Myc	5.4523e-285	0.566428	0.991	0.921	7.60487e-281	3	Myc
Col4a11	6.61924e-108	0.394286	0.952	0.831	9.23251e-104	3	Col4a1
Sirup	8.08988e-91	0.303664	0.93	0.803	1.12838e-86	3	Sirup
sosie	3.4677e-84	0.279003	0.83	0.68	4.83675e-80	3	sosie
Picot	1.55228e-57	0.256358	0.308	0.16	2.16512e-53	3	Picot
h	3.5907e-54	0.307327	0.602	0.446	5.00831e-50	3	h
bun	3.45874e-47	0.253295	0.763	0.629	4.82425e-43	3	bun
CG13227	9.91372e-45	0.30642	0.318	0.186	1.38277e-40	3	CG13227
SPARC	0	1.05269	0.887	0.537	0	4	SPARC
Fas2	0	0.811693	0.803	0.404	0	4	Fas2
Df31	0	0.756833	0.999	0.948	0	4	Df31
stai	2.83355e-302	0.809388	0.78	0.376	3.95223e-298	4	stai
babos	3.5763e-289	0.738848	0.895	0.642	4.98822e-285	4	babos
CG30195	3.28558e-250	0.586399	0.332	0.07	4.58273e-246	4	CG30195
ct	6.10235e-243	0.642334	0.554	0.202	8.51156e-239	4	ct
CG42566	1.17303e-228	0.599615	0.488	0.162	1.63615e-224	4	CG42566
CG42797	6.03287e-220	0.585676	0.519	0.189	8.41464e-216	4	CG42797
His4r	3.74858e-218	0.318869	1	0.999	5.22852e-214	4	His4r
betaTub56D	4.69479e-216	0.48409	0.987	0.954	6.54829e-212	4	betaTub56D
HmgD	2.81529e-197	0.604097	0.87	0.625	3.92677e-193	4	HmgD
Ugt317A1	2.12857e-181	0.495609	0.426	0.143	2.96893e-177	4	Ugt317A1
CG31808	5.6594e-168	0.546976	0.437	0.162	7.89373e-164	4	CG31808
stl	8.50909e-164	0.820355	0.657	0.385	1.18685e-159	4	stl
dUTPase	2.11035e-163	0.502725	0.903	0.745	2.94352e-159	4	dUTPase
stg1	3.43557e-160	0.635314	0.717	0.423	4.79193e-156	4	stg
hdc	2.08332e-157	0.542218	0.582	0.287	2.90582e-153	4	hdc
mamo	1.93901e-151	0.612173	0.709	0.454	2.70453e-147	4	mamo
aurB	1.00884e-144	0.387927	0.275	0.076	1.40714e-140	4	aurB
CG4250	1.9408e-138	0.57773	0.706	0.455	2.70703e-134	4	CG4250
Spn42Dd	1.50439e-129	0.426674	0.294	0.093	2.09833e-125	4	Spn42Dd
Bacc	5.53179e-124	0.338613	0.988	0.974	7.71575e-120	4	Bacc
Pen	5.43695e-123	0.462931	0.382	0.151	7.58346e-119	4	Pen
fz2	1.11339e-112	0.366696	0.299	0.105	1.55296e-108	4	fz2
Uvrag	1.56045e-112	0.398205	0.356	0.142	2.17651e-108	4	Uvrag
CG15365	4.09776e-110	0.328039	0.282	0.095	5.71555e-106	4	CG15365
CNBP	1.97748e-107	0.255719	0.998	0.988	2.75819e-103	4	CNBP
kuk	2.28819e-107	0.358139	0.333	0.127	3.19156e-103	4	kuk
miple2	8.41319e-106	0.469007	0.683	0.478	1.17347e-101	4	miple2
CG30460	3.40393e-105	0.454969	0.451	0.228	4.74781e-101	4	CG30460
Su(var)205	2.52578e-103	0.441464	0.778	0.632	3.52296e-99	4	Su(var)205
Rrp1	4.80983e-103	0.330499	0.253	0.083	6.70875e-99	4	Rrp1
Pdcd4	8.21344e-101	0.415518	0.741	0.553	1.14561e-96	4	Pdcd4
Nnf1a	3.32264e-99	0.348822	0.281	0.101	4.63442e-95	4	Nnf1a
D1	1.50156e-98	0.417814	0.794	0.657	2.09438e-94	4	D1
Jupiter	1.80993e-98	0.554359	0.855	0.787	2.52449e-94	4	Jupiter
Jafrac1	4.33359e-98	0.314512	0.966	0.915	6.04449e-94	4	Jafrac1
dgt2	1.31073e-95	0.360683	0.31	0.123	1.8282e-91	4	dgt2
CG4404	6.7746e-84	0.347899	0.32	0.139	9.44922e-80	4	CG4404
ball	2.21393e-83	0.318644	0.273	0.107	3.08799e-79	4	ball
CG9328	1.15521e-79	0.326996	0.297	0.125	1.61129e-75	4	CG9328
CG42240	1.14725e-78	0.393235	0.517	0.317	1.60018e-74	4	CG42240
LanB1	1.33289e-78	0.378084	0.608	0.423	1.85912e-74	4	LanB1
rgn	2.03024e-76	0.364733	0.525	0.328	2.83178e-72	4	rgn
Frl	2.96124e-76	0.377316	0.615	0.419	4.13034e-72	4	Frl
fax	3.59753e-76	0.35209	0.646	0.435	5.01783e-72	4	fax
Imp	5.71344e-73	0.333994	0.781	0.666	7.96911e-69	4	Imp
RPA3	1.21471e-72	0.391948	0.506	0.315	1.69428e-68	4	RPA3
trol	1.26522e-72	0.314381	0.845	0.75	1.76473e-68	4	trol
shg	5.89456e-72	0.36995	0.54	0.351	8.22174e-68	4	shg
Col4a12	2.0104e-70	0.265414	0.928	0.835	2.80411e-66	4	Col4a1
fng	4.84899e-68	0.316135	0.308	0.145	6.76337e-64	4	fng
14-3-3epsilon	5.44677e-68	0.254872	0.964	0.947	7.59715e-64	4	14-3-3epsilon
Moe	3.8037e-67	0.304005	0.871	0.813	5.3054e-63	4	Moe
Pits	9.22459e-67	0.363492	0.575	0.404	1.28665e-62	4	Pits
Kank	1.6514e-65	0.353832	0.466	0.284	2.30337e-61	4	Kank
CG46339	1.4907e-64	0.291488	0.251	0.106	2.07923e-60	4	CG46339
pch2	1.69853e-64	0.286848	0.275	0.123	2.36912e-60	4	pch2
His2Av	3.81091e-64	0.305931	0.847	0.762	5.31546e-60	4	His2Av
Aldh	2.14359e-63	0.388126	0.536	0.367	2.98988e-59	4	Aldh
CG5149	4.64971e-62	0.359743	0.408	0.238	6.48542e-58	4	CG5149
E(spl)m3-HLH	1.59901e-61	0.287329	0.826	0.704	2.2303e-57	4	E(spl)m3-HLH
RPA2	8.19821e-61	0.308859	0.338	0.175	1.14349e-56	4	RPA2
Asph	3.00158e-60	0.395872	0.406	0.239	4.1866e-56	4	Asph
armi	6.40178e-60	0.28696	0.26	0.117	8.9292e-56	4	armi
jigr1	7.27543e-60	0.297335	0.281	0.132	1.01478e-55	4	jigr1
dj-1beta	3.87259e-59	0.299875	0.788	0.701	5.40149e-55	4	dj-1beta
Uba2	1.07296e-58	0.338789	0.51	0.348	1.49656e-54	4	Uba2
RfC4	2.53196e-58	0.328683	0.406	0.243	3.53158e-54	4	RfC4
piwi	1.16955e-57	0.285439	0.288	0.139	1.63129e-53	4	piwi
ftz-f1	1.95177e-56	0.304744	0.544	0.373	2.72233e-52	4	ftz-f1
ps	9.23542e-56	0.303826	0.679	0.547	1.28816e-51	4	ps
E(spl)m2-BFM	1.27416e-53	0.279496	0.254	0.117	1.7772e-49	4	E(spl)m2-BFM
CG9932	4.88743e-53	0.272151	0.292	0.146	6.81699e-49	4	CG9932
Fas3	7.44424e-51	0.31861	0.547	0.378	1.03832e-46	4	Fas3
metro	1.07342e-50	0.311966	0.4	0.247	1.49721e-46	4	metro
LanA	6.36329e-49	0.328603	0.516	0.375	8.87552e-45	4	LanA
Lam	8.50015e-47	0.291271	0.407	0.257	1.1856e-42	4	Lam
Pka-R2	2.58596e-45	0.27644	0.341	0.197	3.60689e-41	4	Pka-R2
Taldo	4.77671e-45	0.273972	0.804	0.752	6.66256e-41	4	Taldo
Gapdh1	1.83884e-43	0.26376	0.813	0.764	2.56481e-39	4	Gapdh1
geminin	2.6891e-43	0.287854	0.339	0.204	3.75075e-39	4	geminin
GstD9	9.55183e-43	0.286556	0.546	0.406	1.33229e-38	4	GstD9
Non2	2.01847e-42	0.292033	0.613	0.499	2.81536e-38	4	Non2
spen	9.8954e-42	0.274987	0.624	0.515	1.38021e-37	4	spen
Diap1	3.20466e-41	0.298492	0.426	0.29	4.46985e-37	4	Diap1
Lsm12a	3.28958e-41	0.268996	0.67	0.579	4.5883e-37	4	Lsm12a
Obp99a1	6.10405e-41	0.395754	0.436	0.295	8.51392e-37	4	Obp99a
Cdk1	1.25822e-40	0.259035	0.272	0.149	1.75496e-36	4	Cdk1
Lk6	1.50069e-40	0.251623	0.748	0.676	2.09316e-36	4	Lk6
CG10527	6.26293e-40	0.336736	0.552	0.429	8.73553e-36	4	CG10527
lolal	2.79064e-39	0.268342	0.707	0.637	3.89238e-35	4	lolal
Pabp2	3.36124e-39	0.293857	0.58	0.474	4.68826e-35	4	Pabp2
l(1)G0193	9.29441e-39	0.297857	0.496	0.375	1.29638e-34	4	l(1)G0193
Mapmodulin	1.42746e-38	0.25557	0.703	0.614	1.99102e-34	4	Mapmodulin
mnb	3.77173e-37	0.274837	0.446	0.317	5.26081e-33	4	mnb
crol	1.10539e-36	0.281149	0.59	0.477	1.5418e-32	4	crol
RpS15Ab	1.45812e-36	0.269971	0.573	0.471	2.03379e-32	4	RpS15Ab
plum	3.43755e-36	0.268264	0.365	0.239	4.7947e-32	4	plum
kibra	7.42703e-32	0.252341	0.467	0.35	1.03592e-27	4	kibra
PCNA	5.32759e-31	0.257587	0.468	0.343	7.43092e-27	4	PCNA
jim	1.10045e-30	0.253138	0.349	0.236	1.53491e-26	4	jim
gro	1.33197e-29	0.254258	0.352	0.242	1.85783e-25	4	gro
Set	2.68577e-29	0.257783	0.595	0.508	3.74612e-25	4	Set
baf	4.79115e-27	0.251851	0.525	0.434	6.6827e-23	4	baf
CG5946	1.36262e-25	0.291753	0.443	0.351	1.90058e-21	4	CG5946
GstD2	0	1.77557	0.909	0.531	0	5	GstD2
mrva	0	1.10969	0.983	0.661	0	5	mrva
Cp1	0	1.01691	0.987	0.78	0	5	Cp1
Dic1	0	0.827846	0.901	0.494	0	5	Dic1
Ilp6	0	0.661654	0.699	0.228	0	5	Ilp6
CG5835	0	0.525602	0.416	0.074	0	5	CG5835
Dip-B	9.79684e-307	0.533411	0.838	0.379	1.36646e-302	5	Dip-B
Act42A	1.29927e-306	0.826863	0.982	0.868	1.81222e-302	5	Act42A
cib	1.46222e-294	0.772425	0.967	0.736	2.0395e-290	5	cib
cathD	8.19537e-267	0.64498	0.969	0.787	1.14309e-262	5	cathD
CG5853	5.36731e-246	0.524049	0.614	0.2	7.48633e-242	5	CG5853
GstD1	1.10564e-239	0.735156	0.998	0.987	1.54215e-235	5	GstD1
Akap200	7.20646e-220	0.587238	0.945	0.68	1.00516e-215	5	Akap200
Pak3	2.23048e-205	0.514507	0.622	0.237	3.11107e-201	5	Pak3
CG3770	3.0017e-194	0.369042	0.304	0.066	4.18677e-190	5	CG3770
CG5958	4.26846e-193	0.265063	0.754	0.344	5.95365e-189	5	CG5958
Rab7	3.84818e-191	0.508842	0.823	0.453	5.36744e-187	5	Rab7
Cln3	1.41258e-190	0.543046	0.565	0.211	1.97026e-186	5	Cln3
Esp	6.60742e-177	0.518111	0.681	0.31	9.21603e-173	5	Esp
Ady43A	2.99585e-174	0.524338	0.582	0.238	4.17861e-170	5	Ady43A
MFS16	3.68105e-173	0.499017	0.608	0.25	5.13433e-169	5	MFS16
GstD3	3.36334e-171	0.697946	0.918	0.745	4.69118e-167	5	GstD3
CG34194	3.20372e-167	0.523346	0.375	0.109	4.46855e-163	5	CG34194
DOR	3.66478e-151	0.433769	0.625	0.267	5.11163e-147	5	DOR
Chmp1	3.50104e-150	0.483253	0.868	0.584	4.88325e-146	5	Chmp1
Sox14	3.79259e-147	0.388163	0.546	0.215	5.28991e-143	5	Sox14
Sap-r	4.15165e-143	0.418225	0.943	0.747	5.79072e-139	5	Sap-r
Rint1	1.16788e-137	0.371047	0.441	0.161	1.62895e-133	5	Rint1
Fim	2.98419e-134	0.493485	0.653	0.335	4.16235e-130	5	Fim
Fas31	2.92334e-131	0.477153	0.695	0.367	4.07748e-127	5	Fas3
Chd64	1.34819e-130	0.42451	0.957	0.815	1.88046e-126	5	Chd64
Atg8a	6.97297e-130	0.381181	0.916	0.7	9.72589e-126	5	Atg8a
Mlc-c	1.79149e-125	0.448632	0.789	0.491	2.49878e-121	5	Mlc-c
CG6218	9.77783e-125	0.45881	0.569	0.266	1.36381e-120	5	CG6218
Vinc	1.92502e-122	0.288726	0.34	0.108	2.68501e-118	5	Vinc
PhKgamma	2.36359e-122	0.489449	0.779	0.493	3.29674e-118	5	PhKgamma
CG7220	5.75504e-117	0.40302	0.762	0.448	8.02713e-113	5	CG7220
bnb1	8.23246e-114	0.393257	0.411	0.159	1.14826e-109	5	bnb
CG10098	6.77413e-113	0.407767	0.526	0.247	9.44856e-109	5	CG10098
veil1	2.2293e-109	0.433155	0.786	0.512	3.10942e-105	5	veil
Rab8	2.29872e-109	0.296466	0.44	0.175	3.20625e-105	5	Rab8
crq	8.27912e-109	0.286726	0.529	0.236	1.15477e-104	5	crq
Dmtn	4.15285e-108	0.259446	0.334	0.112	5.7924e-104	5	Dmtn
Tre1	4.19711e-108	0.348348	0.517	0.232	5.85412e-104	5	Tre1
Glut4EF	1.22722e-105	0.285878	0.408	0.156	1.71172e-101	5	Glut4EF
Act5C	2.393e-105	0.469331	1	0.997	3.33776e-101	5	Act5C
CG10916	9.18033e-104	0.278348	0.313	0.105	1.28047e-99	5	CG10916
CG3348	1.82263e-103	0.405871	0.297	0.097	2.54221e-99	5	CG3348
scyl	1.00338e-102	0.389927	0.759	0.47	1.39952e-98	5	scyl
Fer1HCH	1.08353e-102	0.302328	0.946	0.806	1.51131e-98	5	Fer1HCH
Bmcp	5.21044e-100	0.288806	0.425	0.175	7.26752e-96	5	Bmcp
prage	6.28273e-99	0.253453	0.312	0.106	8.76315e-95	5	prage
Rac2	1.53036e-97	0.319143	0.611	0.314	2.13454e-93	5	Rac2
Gdh	2.57446e-97	0.369075	0.911	0.739	3.59086e-93	5	Gdh
mys	6.71469e-96	0.360338	0.526	0.253	9.36564e-92	5	mys
CG5059	8.11569e-95	0.333574	0.601	0.307	1.13198e-90	5	CG5059
CG8034	3.6667e-94	0.360422	0.698	0.404	5.11431e-90	5	CG8034
Vha16-1	1.27085e-93	0.250488	0.997	0.978	1.77259e-89	5	Vha16-1
CG13868	3.26156e-92	0.260475	0.34	0.127	4.54922e-88	5	CG13868
sqh	1.70953e-91	0.3725	0.794	0.53	2.38445e-87	5	sqh
Inx3	6.06724e-90	0.388949	0.826	0.597	8.46259e-86	5	Inx3
poly	8.17919e-90	0.380265	0.722	0.463	1.14083e-85	5	poly
Fer2LCH	1.22492e-88	0.272696	0.938	0.803	1.70852e-84	5	Fer2LCH
Adk3	6.56341e-88	0.258375	0.44	0.196	9.15464e-84	5	Adk3
CG9338	8.60823e-88	0.259133	0.313	0.114	1.20068e-83	5	CG9338
Acsl	1.46295e-87	0.258178	0.379	0.154	2.04052e-83	5	Acsl
CtsB1	8.80735e-86	0.282631	0.957	0.838	1.22845e-81	5	CtsB1
Tina-1	2.05673e-85	0.414163	0.729	0.504	2.86873e-81	5	Tina-1
Rab1	3.32232e-84	0.346064	0.864	0.676	4.63397e-80	5	Rab1
CG6891	3.80783e-84	0.343766	0.94	0.795	5.31116e-80	5	CG6891
fbl	9.08777e-84	0.261588	0.358	0.146	1.26756e-79	5	fbl
CG1572	4.83734e-83	0.387859	0.723	0.461	6.74712e-79	5	CG1572
ReepB	5.17429e-83	0.291706	0.961	0.861	7.2171e-79	5	ReepB
capt	3.28829e-81	0.376231	0.646	0.389	4.58651e-77	5	capt
shrb	4.06504e-81	0.348287	0.703	0.448	5.66991e-77	5	shrb
spict	4.14013e-81	0.313632	0.509	0.257	5.77465e-77	5	spict
CG14207	1.39965e-80	0.357691	0.508	0.255	1.95224e-76	5	CG14207
Vps2	7.48078e-80	0.312495	0.574	0.309	1.04342e-75	5	Vps2
NK7.1	7.7626e-79	0.262324	0.415	0.185	1.08273e-74	5	NK7.1
cer	4.6503e-78	0.257484	0.703	0.454	6.48623e-74	5	cer
Vm26Aa1	3.5221e-74	0.813198	0.317	0.136	4.91263e-70	5	Vm26Aa
CG45050	9.77322e-68	0.289777	0.594	0.338	1.36317e-63	5	CG45050
CG76751	2.40743e-66	0.337788	0.456	0.237	3.35788e-62	5	CG7675
CG15347	5.46727e-65	0.479056	0.411	0.212	7.62575e-61	5	CG15347
Rab11	1.13669e-62	0.295899	0.69	0.457	1.58546e-58	5	Rab11
Adk1	1.36096e-59	0.269203	0.365	0.178	1.89826e-55	5	Adk1
bun1	1.58195e-59	0.287248	0.824	0.627	2.2065e-55	5	bun
Vps60	1.19882e-57	0.284035	0.618	0.388	1.67212e-53	5	Vps60
zip	1.30288e-57	0.297681	0.833	0.639	1.81726e-53	5	zip
Rtnl12	1.90484e-55	0.275392	0.903	0.767	2.65688e-51	5	Rtnl1
stv	3.33307e-54	0.268509	0.704	0.483	4.64897e-50	5	stv
Arpc3A	1.38429e-53	0.258544	0.628	0.4	1.93081e-49	5	Arpc3A
Rab5	8.18979e-53	0.267065	0.738	0.517	1.14231e-48	5	Rab5
Tspo	3.38747e-52	0.26654	0.85	0.675	4.72485e-48	5	Tspo
GstE3	4.71535e-52	0.278113	0.301	0.141	6.57698e-48	5	GstE3
NAT1	6.40006e-51	0.277633	0.714	0.5	8.92681e-47	5	NAT1
ZnT63C	2.93749e-46	0.252299	0.42	0.234	4.0972e-42	5	ZnT63C
Yp22	6.18642e-44	0.433491	0.954	0.903	8.62882e-40	5	Yp2
Swim	4.79603e-37	0.262281	0.667	0.492	6.6895e-33	5	Swim
Yp31	1.0088e-35	0.601275	0.857	0.77	1.40708e-31	5	Yp3
Vm26Ab1	1.9005e-23	0.476305	0.487	0.358	2.65082e-19	5	Vm26Ab
ImpL2	0	1.59089	0.959	0.468	0	6	ImpL2
Oat	0	1.15362	0.991	0.787	0	6	Oat
Argk	0	1.05939	0.823	0.406	0	6	Argk
Vha14-1	0	0.928254	0.955	0.641	0	6	Vha14-1
Vha13	0	0.767124	0.996	0.913	0	6	Vha13
CG33939	0	0.62827	0.374	0.048	0	6	CG33939
Vha16-11	0	0.615241	0.998	0.978	0	6	Vha16-1
Cam	0	0.6048	1	0.986	0	6	Cam
CG31098	4.75398e-295	0.575166	0.456	0.102	6.63085e-291	6	CG31098
RNASEK	1.07632e-264	0.511486	1	0.982	1.50125e-260	6	RNASEK
Vha68-2	2.23861e-231	0.698298	0.84	0.505	3.12242e-227	6	Vha68-2
VhaM9.7-b	4.31045e-231	0.617015	0.966	0.813	6.01221e-227	6	VhaM9.7-b
ATP6AP2	1.08591e-227	0.715128	0.853	0.528	1.51462e-223	6	ATP6AP2
Vha36-1	2.10322e-226	0.65257	0.908	0.645	2.93357e-222	6	Vha36-1
Sam-S	4.81823e-225	0.611994	0.994	0.918	6.72047e-221	6	Sam-S
Inos	8.52493e-221	0.6911	0.676	0.29	1.18906e-216	6	Inos
Cln31	4.62956e-217	0.627576	0.587	0.211	6.45731e-213	6	Cln3
Obp44a	4.1003e-216	1.09975	0.472	0.146	5.71909e-212	6	Obp44a
Sdc	5.49924e-214	0.643509	0.813	0.446	7.67035e-210	6	Sdc
CG73222	4.14003e-207	0.669758	0.762	0.389	5.77452e-203	6	CG7322
path	5.36008e-203	0.700139	0.919	0.729	7.47625e-199	6	path
Vha26	2.55161e-202	0.636859	0.881	0.596	3.55899e-198	6	Vha26
Hsp23	1.6219e-200	0.77504	0.996	0.965	2.26223e-196	6	Hsp23
GstD31	1.34638e-196	0.680899	0.944	0.744	1.87793e-192	6	GstD3
Vha44	4.39363e-191	0.603281	0.9	0.69	6.12823e-187	6	Vha44
GstD11	8.457e-182	0.44437	1	0.987	1.17958e-177	6	GstD1
Vha55	6.47571e-177	0.567912	0.859	0.598	9.03232e-173	6	Vha55
Adk11	4.58685e-168	0.5556	0.475	0.17	6.39773e-164	6	Adk1
cv-2	1.66184e-165	0.453255	0.295	0.069	2.31793e-161	6	cv-2
GstS11	1.58956e-161	0.591023	0.61	0.279	2.21712e-157	6	GstS1
Act5C1	3.12942e-161	0.332224	0.999	0.997	4.36492e-157	6	Act5C
Usf	8.11858e-157	0.462218	0.441	0.15	1.13238e-152	6	Usf
CG1628	7.5938e-149	0.535292	0.699	0.379	1.05918e-144	6	CG1628
CG6310	6.5968e-140	0.546173	0.732	0.419	9.20122e-136	6	CG6310
CG10874	1.06661e-134	0.392381	0.37	0.12	1.48771e-130	6	CG10874
tsr	1.50044e-134	0.28488	1	0.996	2.09282e-130	6	tsr
HmgZ	7.59089e-134	0.38819	0.994	0.964	1.05878e-129	6	HmgZ
VhaPPA1-1	2.09132e-131	0.542509	0.76	0.484	2.91698e-127	6	VhaPPA1-1
kar	3.79413e-128	0.51968	0.77	0.508	5.29205e-124	6	kar
Hsp27	2.85791e-127	0.599495	0.935	0.818	3.98622e-123	6	Hsp27
Ent2	1.13215e-122	0.459036	0.84	0.575	1.57912e-118	6	Ent2
VhaAC39-1	3.22882e-117	0.464147	0.759	0.498	4.50355e-113	6	VhaAC39-1
CG68911	4.87866e-117	0.441881	0.938	0.796	6.80475e-113	6	CG6891
GstE14	1.15381e-115	0.491441	0.666	0.378	1.60934e-111	6	GstE14
COX7A	1.41268e-114	0.265703	0.999	0.989	1.97041e-110	6	COX7A
Inx31	4.45526e-113	0.448373	0.828	0.598	6.21419e-109	6	Inx3
Dg	1.36221e-110	0.404118	0.433	0.179	1.90001e-106	6	Dg
ZnT63C1	8.6684e-109	0.450963	0.491	0.229	1.20907e-104	6	ZnT63C
VhaAC45	2.36598e-95	0.438222	0.699	0.458	3.30007e-91	6	VhaAC45
Hsp26	9.96319e-93	0.502247	0.978	0.949	1.38967e-88	6	Hsp26
CG153471	2.07337e-86	0.295108	0.457	0.209	2.89193e-82	6	CG15347
CG1620	5.02638e-86	0.394732	0.891	0.713	7.0108e-82	6	CG1620
Vha100-2	6.86806e-86	0.395512	0.658	0.41	9.57957e-82	6	Vha100-2
CG43693	5.34195e-79	0.382724	0.723	0.49	7.45095e-75	6	CG43693
Fum1	8.0194e-79	0.333312	0.872	0.692	1.11855e-74	6	Fum1
cue	3.625e-76	0.352805	0.565	0.324	5.05615e-72	6	cue
Hsp70Bc	1.3249e-75	0.490888	0.607	0.384	1.84797e-71	6	Hsp70Bc
GstE12	1.65378e-70	0.340144	0.838	0.666	2.30669e-66	6	GstE12
Ald1	1.80093e-70	0.358353	0.641	0.404	2.51194e-66	6	Ald1
NT5E-2	7.43589e-70	0.338619	0.479	0.26	1.03716e-65	6	NT5E-2
CG171241	4.86469e-68	0.362255	0.604	0.373	6.78527e-64	6	CG17124
CG6040	7.68675e-62	0.301405	0.395	0.2	1.07215e-57	6	CG6040
Hsp67Bc	8.32798e-61	0.483634	0.692	0.508	1.16159e-56	6	Hsp67Bc
Dl	3.76548e-60	0.331994	0.739	0.544	5.25209e-56	6	Dl
vkg	3.68048e-58	0.306772	0.819	0.636	5.13353e-54	6	vkg
rost	6.44788e-57	0.2879	0.361	0.179	8.9935e-53	6	rost
CG100981	4.13259e-56	0.277821	0.453	0.254	5.76413e-52	6	CG10098
Amph	8.53895e-56	0.33296	0.334	0.164	1.19101e-51	6	Amph
VhaSFD	3.2981e-54	0.289525	0.561	0.355	4.60018e-50	6	VhaSFD
CG31694	1.10483e-52	0.290315	0.44	0.253	1.54102e-48	6	CG31694
DnaJ-1	2.57803e-52	0.337565	0.781	0.626	3.59583e-48	6	DnaJ-1
Eno	3.74889e-52	0.274756	0.897	0.769	5.22896e-48	6	Eno
slgA	8.51898e-50	0.294427	0.489	0.291	1.18823e-45	6	slgA
alt	1.09682e-49	0.296832	0.594	0.397	1.52984e-45	6	alt
Hsp68	5.95058e-48	0.398774	0.669	0.514	8.29987e-44	6	Hsp68
GCS2alpha	1.1055e-47	0.291328	0.576	0.393	1.54194e-43	6	GCS2alpha
w	1.35583e-46	0.250399	0.933	0.824	1.89111e-42	6	w
CG5214	2.61239e-44	0.25791	0.684	0.504	3.64376e-40	6	CG5214
capt1	2.91778e-44	0.255432	0.589	0.395	4.06972e-40	6	capt
CG7970	1.27889e-40	0.257505	0.573	0.391	1.7838e-36	6	CG7970
CG14818	1.70623e-40	0.251665	0.545	0.364	2.37985e-36	6	CG14818
veil2	1.90078e-40	0.257395	0.702	0.52	2.6512e-36	6	veil
betaTub97EF	2.79956e-40	0.257753	0.546	0.364	3.90483e-36	6	betaTub97EF
Past1	1.7595e-38	0.256945	0.475	0.303	2.45415e-34	6	Past1
CG17224	1.01617e-30	0.257902	0.41	0.267	1.41736e-26	6	CG17224
GstD91	4.3775e-25	0.270454	0.55	0.408	6.10574e-21	6	GstD9
Dip-B1	0	2.53201	0.947	0.379	0	7	Dip-B
CG59581	0	2.31574	0.971	0.335	0	7	CG5958
CG153472	0	1.95062	0.826	0.186	0	7	CG15347
Cp11	0	1.81335	0.997	0.783	0	7	Cp1
CREG	0	1.80625	0.896	0.131	0	7	CREG
cer1	0	1.80467	0.982	0.438	0	7	cer
CG58531	0	1.75743	0.898	0.186	0	7	CG5853
cib1	0	1.698	0.997	0.737	0	7	cib
crq1	0	1.62355	0.913	0.213	0	7	crq
mrva1	0	1.61495	0.986	0.665	0	7	mrva
Rab71	0	1.52631	0.955	0.449	0	7	Rab7
GILT1	0	1.47588	0.979	0.676	0	7	GILT1
Fer2LCH1	0	1.38583	0.993	0.802	0	7	Fer2LCH
DOR1	0	1.37855	0.858	0.256	0	7	DOR
Fer1HCH1	0	1.37	0.994	0.805	0	7	Fer1HCH
CG15083	0	1.34909	0.954	0.629	0	7	CG15083
Akap2001	0	1.34341	0.988	0.681	0	7	Akap200
Npc2a	0	1.33811	0.99	0.842	0	7	Npc2a
CG1943	0	1.28438	0.955	0.546	0	7	CG1943
Cyp18a11	0	1.27765	0.825	0.341	0	7	Cyp18a1
Drat	0	1.26232	0.747	0.153	0	7	Drat
CG13321	0	1.2279	0.292	0.033	0	7	CG13321
Ilp61	0	1.22712	0.812	0.227	0	7	Ilp6
Pi3K21B	0	1.22264	0.801	0.219	0	7	Pi3K21B
Atg8a1	0	1.20515	0.972	0.7	0	7	Atg8a
cathD1	0	1.18432	0.99	0.788	0	7	cathD
Act42A1	0	1.15828	0.981	0.87	0	7	Act42A
CG5973	0	1.12527	0.658	0.078	0	7	CG5973
Esp1	0	1.09844	0.781	0.308	0	7	Esp
Lip4	0	1.0651	0.554	0.08	0	7	Lip4
Cys	0	1.04765	0.542	0.109	0	7	Cys
Sap-r1	0	1.03989	0.977	0.748	0	7	Sap-r
N	0	1.03939	0.999	0.926	0	7	N
Sox141	0	1.01378	0.756	0.205	0	7	Sox14
CG33523	0	1.01146	0.692	0.144	0	7	CG33523
CG11151	0	0.985506	0.812	0.333	0	7	CG11151
CG3662	0	0.97354	0.747	0.245	0	7	CG3662
CG18622	0	0.965715	0.538	0.048	0	7	CG18622
CtsB11	0	0.956055	0.987	0.837	0	7	CtsB1
bif	0	0.946874	0.696	0.166	0	7	bif
CG11378	0	0.937576	0.589	0.1	0	7	CG11378
SLC5A11	0	0.924793	0.526	0.032	0	7	SLC5A11
Hmgs	0	0.918937	0.681	0.199	0	7	Hmgs
CG3164	0	0.911372	0.676	0.178	0	7	CG3164
CG44085	0	0.907548	0.516	0.05	0	7	CG44085
Oda	0	0.907463	1	0.979	0	7	Oda
egh	0	0.905722	0.71	0.219	0	7	egh
Qsox1	0	0.901846	0.589	0.113	0	7	Qsox1
CG13907	0	0.891365	0.575	0.101	0	7	CG13907
CG1998	0	0.869315	0.455	0.021	0	7	CG1998
mthl14	0	0.868287	0.521	0.028	0	7	mthl14
CG10365	0	0.856232	0.592	0.115	0	7	CG10365
CG8112	0	0.840114	0.622	0.146	0	7	CG8112
bwa	0	0.835557	0.524	0.045	0	7	bwa
CG30197	0	0.829132	0.439	0.038	0	7	CG30197
CG341941	0	0.805755	0.508	0.103	0	7	CG34194
CG7900	0	0.802665	0.542	0.129	0	7	CG7900
CG12012	0	0.770382	0.597	0.151	0	7	CG12012
Ctl2	0	0.758181	0.587	0.142	0	7	Ctl2
Mvl	0	0.742037	0.511	0.077	0	7	Mvl
Ent1	0	0.73774	0.536	0.111	0	7	Ent1
CaMKI	0	0.720449	0.533	0.101	0	7	CaMKI
CG93381	0	0.70586	0.5	0.104	0	7	CG9338
CG10126	0	0.696155	0.433	0.069	0	7	CG10126
CG32091	0	0.686284	0.443	0.055	0	7	CG32091
Gfat1	0	0.683865	0.342	0.02	0	7	Gfat1
Adgf-A	0	0.666714	0.489	0.091	0	7	Adgf-A
CG9674	0	0.664237	0.457	0.07	0	7	CG9674
Syx4	0	0.633341	0.446	0.048	0	7	Syx4
CG11882	0	0.624358	0.43	0.066	0	7	CG11882
CG6231	0	0.621226	0.441	0.078	0	7	CG6231
Pex13	0	0.618851	0.46	0.086	0	7	Pex13
Cerk	0	0.610996	0.456	0.075	0	7	Cerk
CG8066	0	0.604006	0.41	0.066	0	7	CG8066
Mct1	0	0.585924	0.399	0.044	0	7	Mct1
CG12655	0	0.575798	0.297	0.017	0	7	CG12655
Kal1	0	0.574411	0.37	0.039	0	7	Kal1
CG5009	0	0.570116	0.387	0.05	0	7	CG5009
CG50591	1.42716e-302	0.904837	0.764	0.3	1.99061e-298	7	CG5059
scyl1	4.51516e-298	0.993956	0.873	0.466	6.29775e-294	7	scyl
CG17292	5.08026e-295	0.753533	0.551	0.141	7.08595e-291	7	CG17292
AnxB9	8.79388e-294	0.815168	0.632	0.188	1.22657e-289	7	AnxB9
MFS161	5.71335e-290	0.835341	0.703	0.249	7.96898e-286	7	MFS16
Rint11	1.38594e-280	0.699448	0.568	0.156	1.9331e-276	7	Rint1
luna	4.55854e-280	0.561914	0.414	0.079	6.35825e-276	7	luna
Spn	8.01866e-272	0.71457	0.556	0.149	1.11844e-267	7	Spn
Fas32	2.84767e-267	0.87016	0.817	0.364	3.97193e-263	7	Fas3
alphaSnap	5.58185e-267	0.826025	0.758	0.329	7.78556e-263	7	alphaSnap
CG80341	1.43682e-265	0.910224	0.817	0.401	2.00408e-261	7	CG8034
Dic11	2.56024e-265	0.890084	0.869	0.502	3.57102e-261	7	Dic1
emp	2.00277e-263	0.382358	0.252	0.029	2.79346e-259	7	emp
Gdap2	6.10398e-262	0.647218	0.425	0.09	8.51383e-258	7	Gdap2
CG13784	1.52196e-256	0.473659	0.345	0.059	2.12283e-252	7	CG13784
ReepB1	3.83075e-251	0.67326	0.974	0.862	5.34313e-247	7	ReepB
Sirup1	4.14877e-251	1.04284	0.973	0.805	5.7867e-247	7	Sirup
CG18508	6.12901e-251	0.714661	0.507	0.139	8.54874e-247	7	CG18508
Vha16-12	1.54209e-249	0.536492	0.996	0.978	2.15091e-245	7	Vha16-1
fax1	9.27766e-245	0.823918	0.854	0.426	1.29405e-240	7	fax
Chd641	3.43895e-244	0.734786	0.968	0.817	4.79664e-240	7	Chd64
GstO3	4.37544e-244	0.968701	0.518	0.149	6.10286e-240	7	GstO3
CG4935	8.80753e-244	0.432291	0.34	0.058	1.22847e-239	7	CG4935
CG34112	1.40085e-239	0.475179	0.33	0.058	1.95391e-235	7	CG34112
Rac21	8.31929e-236	0.805765	0.724	0.311	1.16037e-231	7	Rac2
chic	3.11056e-229	0.589378	0.992	0.959	4.3386e-225	7	chic
Fpps	1.36428e-228	0.552754	0.343	0.066	1.9029e-224	7	Fpps
aqz	1.17315e-225	0.622497	0.994	0.918	1.6363e-221	7	aqz
Pak31	1.15719e-224	0.692621	0.649	0.242	1.61405e-220	7	Pak3
Lpin	1.50669e-222	0.614183	0.512	0.148	2.10153e-218	7	Lpin
CG72201	4.67191e-222	0.786549	0.834	0.448	6.51637e-218	7	CG7220
Adk31	9.48567e-222	0.688209	0.569	0.191	1.32306e-217	7	Adk3
rudhira	9.29099e-219	0.629039	0.594	0.2	1.29591e-214	7	rudhira
Sc2	2.98939e-218	0.785153	0.738	0.356	4.1696e-214	7	Sc2
Fim1	3.87627e-218	0.835314	0.719	0.335	5.40663e-214	7	Fim
CG9527	6.13201e-214	0.385283	0.261	0.039	8.55293e-210	7	CG9527
ben	1.07219e-212	0.652348	0.948	0.767	1.49549e-208	7	ben
ref(2)P	3.5137e-212	0.756229	0.635	0.249	4.90091e-208	7	ref(2)P
CG1637	2.58145e-211	0.754979	0.653	0.275	3.60061e-207	7	CG1637
CG7194	1.2304e-210	0.766733	0.555	0.192	1.71616e-206	7	CG7194
RNaseX25	4.271e-209	0.699814	0.638	0.253	5.95719e-205	7	RNaseX25
Dmtn1	1.32759e-207	0.532139	0.427	0.109	1.85172e-203	7	Dmtn
Zip99C	1.45191e-207	0.589676	0.358	0.077	2.02513e-203	7	Zip99C
Vamp7	6.66733e-207	0.719702	0.617	0.235	9.2996e-203	7	Vamp7
Lerp	3.09023e-205	0.43416	0.302	0.055	4.31026e-201	7	Lerp
CG2064	9.26744e-204	0.585835	0.48	0.141	1.29262e-199	7	CG2064
Arpc3A1	3.80867e-202	0.674294	0.773	0.393	5.31233e-198	7	Arpc3A
Rab12	7.49017e-202	0.685623	0.912	0.676	1.04473e-197	7	Rab1
CG12576	7.3803e-201	0.671293	0.601	0.223	1.0294e-196	7	CG12576
Ppt2	2.10344e-199	0.448466	0.361	0.081	2.93388e-195	7	Ppt2
CG42394	2.79527e-199	0.551031	0.422	0.108	3.89884e-195	7	CG42394
sosie1	1.17272e-198	1.14735	0.876	0.683	1.63571e-194	7	sosie
CG13384	2.97593e-197	0.605928	0.489	0.151	4.15083e-193	7	CG13384
CG68912	2.42401e-196	0.645247	0.958	0.796	3.381e-192	7	CG6891
Leash	1.73944e-195	0.378035	0.3	0.056	2.42617e-191	7	Leash
udt	6.09768e-194	0.415906	0.291	0.054	8.50504e-190	7	udt
SH3PX1	6.11152e-194	0.631573	0.558	0.196	8.52435e-190	7	SH3PX1
PHGPx	1.79463e-189	0.776324	0.772	0.423	2.50315e-185	7	PHGPx
Lamp1	1.64759e-188	0.698214	0.83	0.503	2.29806e-184	7	Lamp1
CG12290	4.95646e-188	0.549607	0.382	0.094	6.91328e-184	7	CG12290
Ubi-p63E	1.74139e-183	0.728151	0.779	0.439	2.42889e-179	7	Ubi-p63E
CG3077	2.32819e-183	0.44214	0.351	0.082	3.24736e-179	7	CG3077
drpr	1.51669e-178	0.618286	0.542	0.2	2.11548e-174	7	drpr
RabX1	2.17601e-178	0.521721	0.406	0.111	3.0351e-174	7	RabX1
GstE31	8.14686e-178	0.869108	0.435	0.134	1.13632e-173	7	GstE3
Thor	2.51458e-177	0.738452	0.779	0.42	3.50733e-173	7	Thor
CG13319	9.86957e-176	0.656823	0.592	0.244	1.37661e-171	7	CG13319
PhKgamma1	1.32482e-175	0.811831	0.801	0.495	1.84785e-171	7	PhKgamma
Ho	2.66553e-173	0.434366	0.359	0.088	3.71788e-169	7	Ho
CenB1A	4.02053e-173	0.435924	0.327	0.075	5.60784e-169	7	CenB1A
Arl8	4.04933e-173	0.602047	0.559	0.211	5.648e-169	7	Arl8
Best1	2.03362e-171	0.440916	0.401	0.11	2.8365e-167	7	Best1
Scamp	1.17914e-169	0.629955	0.683	0.327	1.64466e-165	7	Scamp
Glut4EF1	2.24341e-169	0.547226	0.478	0.155	3.12911e-165	7	Glut4EF
Lsd-2	9.77431e-168	0.518161	0.396	0.113	1.36332e-163	7	Lsd-2
E(spl)mbeta-HLH	7.74562e-167	0.701602	0.959	0.797	1.08036e-162	7	E(spl)mbeta-HLH
Zip88E	2.11152e-166	0.755328	0.573	0.236	2.94515e-162	7	Zip88E
Eip93F	2.06273e-165	0.576045	0.543	0.203	2.87709e-161	7	Eip93F
cbt	4.09759e-164	0.582614	0.493	0.172	5.71532e-160	7	cbt
CG8814	1.28427e-160	0.414023	0.321	0.077	1.79131e-156	7	CG8814
CG138681	7.24352e-159	0.486925	0.415	0.125	1.01033e-154	7	CG13868
CG10195	9.98591e-158	0.416077	0.315	0.075	1.39283e-153	7	CG10195
scramb1	2.49418e-157	0.433653	0.375	0.105	3.47888e-153	7	scramb1
Mes2	1.095e-156	0.45499	0.349	0.091	1.5273e-152	7	Mes2
spidey	1.34223e-154	0.61599	0.867	0.61	1.87214e-150	7	spidey
Ady43A1	2.00896e-154	0.645406	0.568	0.244	2.8021e-150	7	Ady43A
Vinc1	4.64937e-153	0.431876	0.381	0.109	6.48494e-149	7	Vinc
CG17597	1.88936e-152	0.568992	0.38	0.114	2.63528e-148	7	CG17597
Atg18a	5.70593e-151	0.520143	0.501	0.185	7.95862e-147	7	Atg18a
kune	5.75901e-151	0.478305	0.392	0.116	8.03267e-147	7	kune
Jupiter1	1.01419e-149	0.622336	0.942	0.783	1.4146e-145	7	Jupiter
prtp	6.37009e-149	0.705853	0.738	0.425	8.885e-145	7	prtp
CG30344	2.32108e-147	0.406578	0.312	0.078	3.23744e-143	7	CG30344
Acsl1	9.0778e-147	0.542356	0.446	0.152	1.26617e-142	7	Acsl
CG8974	2.00611e-146	0.561777	0.597	0.268	2.79813e-142	7	CG8974
CG12163	2.75534e-146	0.558681	0.643	0.303	3.84315e-142	7	CG12163
fsd	2.7937e-146	0.378941	0.309	0.077	3.89666e-142	7	fsd
Eip75B	3.61096e-146	0.645566	0.808	0.527	5.03657e-142	7	Eip75B
Cortactin	4.63969e-146	0.47951	0.475	0.17	6.47143e-142	7	Cortactin
CG5346	8.70934e-146	0.570811	0.527	0.209	1.21478e-141	7	CG5346
Rab51	2.56788e-143	0.584925	0.796	0.516	3.58168e-139	7	Rab5
Indy	3.70139e-143	0.557207	0.506	0.196	5.1627e-139	7	Indy
Hsp681	5.63488e-143	0.989463	0.77	0.508	7.85952e-139	7	Hsp68
Mp	1.20627e-142	0.592244	0.549	0.23	1.6825e-138	7	Mp
pasi2	5.49041e-142	0.38224	0.32	0.083	7.65802e-138	7	pasi2
Nmda1	5.99728e-141	0.521793	0.578	0.252	8.36501e-137	7	Nmda1
CG109161	3.28828e-140	0.413076	0.36	0.104	4.58649e-136	7	CG10916
Hsp261	5.85704e-140	0.870515	0.978	0.949	8.16939e-136	7	Hsp26
CG8180	8.93247e-140	0.3723	0.286	0.068	1.2459e-135	7	CG8180
Cirl	3.71959e-139	0.450599	0.427	0.141	5.18808e-135	7	Cirl
kek5	3.75601e-139	0.538259	0.567	0.245	5.23888e-135	7	kek5
DnaJ-11	3.74243e-136	0.769383	0.839	0.623	5.21994e-132	7	DnaJ-1
BI-1	1.39106e-135	0.591941	0.71	0.402	1.94025e-131	7	BI-1
CG30423	2.24593e-135	0.546841	0.855	0.602	3.13263e-131	7	CG30423
CG7054	3.54951e-134	0.404148	0.324	0.09	4.95085e-130	7	CG7054
LRR	5.95338e-134	0.348437	0.28	0.068	8.30377e-130	7	LRR
CG17574	2.69454e-133	0.456672	0.428	0.148	3.75835e-129	7	CG17574
CG2865	2.06769e-132	0.529635	0.636	0.306	2.88401e-128	7	CG2865
ScpX	3.6003e-132	0.473549	0.479	0.185	5.0217e-128	7	ScpX
CG142071	5.81175e-132	0.557176	0.58	0.254	8.10622e-128	7	CG14207
crim	1.29541e-131	0.36041	0.309	0.083	1.80683e-127	7	crim
hid	1.92798e-130	0.480623	0.461	0.168	2.68915e-126	7	hid
CG4797	8.83447e-130	0.45281	0.396	0.134	1.23223e-125	7	CG4797
GstD21	1.15095e-127	0.997432	0.787	0.546	1.60534e-123	7	GstD2
Agpat3	1.33879e-127	0.593502	0.667	0.367	1.86734e-123	7	Agpat3
cold	3.09194e-127	0.320481	0.257	0.06	4.31263e-123	7	cold
Hsp271	5.5117e-127	0.765401	0.935	0.82	7.68772e-123	7	Hsp27
CG42673	3.36148e-126	0.341765	0.251	0.058	4.68859e-122	7	CG42673
sws	3.12959e-125	0.316645	0.273	0.068	4.36515e-121	7	sws
Pex11	5.28397e-125	0.428426	0.386	0.128	7.37008e-121	7	Pex11
spict1	1.11987e-124	0.508878	0.563	0.257	1.56199e-120	7	spict
Hsp231	2.37876e-123	0.978573	0.981	0.967	3.3179e-119	7	Hsp23
CG11791	2.53242e-123	0.497786	0.516	0.22	3.53222e-119	7	CG11791
Frl1	2.93024e-123	0.531979	0.739	0.416	4.0871e-119	7	Frl
Sbp2	1.28586e-122	0.333019	0.272	0.069	1.79351e-118	7	Sbp2
stas	2.82911e-121	0.457238	0.446	0.17	3.94604e-117	7	stas
CG33229	3.6883e-121	0.51144	0.558	0.254	5.14444e-117	7	CG33229
Tspo1	6.00876e-121	0.513673	0.873	0.676	8.38101e-117	7	Tspo
mys1	7.50442e-120	0.513639	0.552	0.255	1.04672e-115	7	mys
Bmcp1	2.00909e-119	0.454407	0.452	0.177	2.80228e-115	7	Bmcp
E(spl)m3-HLH1	2.61034e-119	0.609255	0.889	0.703	3.6409e-115	7	E(spl)m3-HLH
Vps20	5.60191e-119	0.494907	0.637	0.328	7.81354e-115	7	Vps20
CG15012	1.2677e-118	0.512286	0.807	0.555	1.76819e-114	7	CG15012
CG450501	1.62676e-117	0.512071	0.642	0.339	2.26901e-113	7	CG45050
Rab18	1.90998e-117	0.494333	0.586	0.282	2.66404e-113	7	Rab18
Mlc-c1	1.72035e-116	0.525335	0.77	0.497	2.39954e-112	7	Mlc-c
Bsg	7.54704e-116	0.447073	0.452	0.175	1.05266e-111	7	Bsg
AdipoR	1.79824e-115	0.526726	0.64	0.341	2.50819e-111	7	AdipoR
CG12112	1.3484e-114	0.301046	0.254	0.064	1.88075e-110	7	CG12112
CG15098	4.08808e-114	0.489601	0.904	0.736	5.70205e-110	7	CG15098
Vps21	7.21568e-114	0.467722	0.609	0.31	1.00644e-109	7	Vps2
Pis	2.38391e-113	0.437649	0.443	0.174	3.32507e-109	7	Pis
kuz	4.29529e-113	0.485858	0.597	0.294	5.99106e-109	7	kuz
Pmp70	9.87809e-113	0.322555	0.26	0.067	1.3778e-108	7	Pmp70
Hsp70Bc1	1.87523e-112	0.731525	0.657	0.383	2.61557e-108	7	Hsp70Bc
CG9577	2.3205e-112	0.549064	0.704	0.425	3.23664e-108	7	CG9577
prage1	5.13835e-112	0.379058	0.337	0.107	7.16697e-108	7	prage
Chchd2	1.27683e-111	0.421026	0.985	0.939	1.78093e-107	7	Chchd2
CG14478	5.13327e-109	0.515116	0.594	0.306	7.15988e-105	7	CG14478
CG1882	7.4384e-109	0.386761	0.366	0.127	1.03751e-104	7	CG1882
CG5590	7.80625e-109	0.516323	0.763	0.495	1.08882e-104	7	CG5590
Dip-C	3.09538e-107	0.364821	0.315	0.098	4.31744e-103	7	Dip-C
Wwox	3.77959e-106	0.313847	0.264	0.072	5.27177e-102	7	Wwox
CG7611	7.00654e-106	0.330222	0.331	0.107	9.77272e-102	7	CG7611
RhoGDI	8.03353e-106	0.487786	0.774	0.514	1.12052e-101	7	RhoGDI
Pgd	1.42527e-105	0.434229	0.424	0.167	1.98797e-101	7	Pgd
GstD12	7.37763e-105	0.498321	0.99	0.988	1.02903e-100	7	GstD1
CG8839	2.19188e-104	0.402086	0.407	0.154	3.05724e-100	7	CG8839
Hnf4	1.77193e-103	0.436069	0.479	0.207	2.47149e-99	7	Hnf4
sax	2.30798e-103	0.333718	0.256	0.07	3.21916e-99	7	sax
RhoGAP71E	8.54282e-103	0.421549	0.454	0.19	1.19155e-98	7	RhoGAP71E
MESK2	6.38514e-102	0.366138	0.319	0.104	8.906e-98	7	MESK2
CG32039	4.14257e-100	0.401946	0.409	0.163	5.77806e-96	7	CG32039
CG9008	6.78034e-100	0.307056	0.266	0.077	9.45722e-96	7	CG9008
M6	7.82386e-100	0.311159	0.267	0.077	1.09127e-95	7	M6
eIF1	1.94854e-99	0.327467	0.99	0.963	2.71783e-95	7	eIF1
CG6707	2.19467e-99	0.443956	0.511	0.241	3.06113e-95	7	CG6707
Vps601	7.75978e-99	0.475641	0.665	0.388	1.08233e-94	7	Vps60
kay	1.5251e-98	0.418677	0.392	0.154	2.12721e-94	7	kay
Cln32	3.04313e-98	0.508132	0.489	0.222	4.24456e-94	7	Cln3
CG16953	2.32351e-97	0.345635	0.321	0.108	3.24084e-93	7	CG16953
REPTOR-BP	2.47843e-97	0.45524	0.656	0.369	3.45691e-93	7	REPTOR-BP
Got2	3.52616e-97	0.503023	0.726	0.478	4.91828e-93	7	Got2
AhcyL1	7.6082e-97	0.338969	0.319	0.107	1.06119e-92	7	AhcyL1
CG10082	9.22746e-97	0.390902	0.394	0.152	1.28705e-92	7	CG10082
CG17834	3.27887e-95	0.331548	0.292	0.093	4.57337e-91	7	CG17834
Cln7	4.41311e-95	0.322124	0.268	0.081	6.15541e-91	7	Cln7
fbl1	2.85536e-94	0.391876	0.381	0.148	3.98266e-90	7	fbl
Snx3	8.25711e-94	0.41494	0.533	0.261	1.1517e-89	7	Snx3
CG4287	8.61229e-94	0.285009	0.265	0.079	1.20124e-89	7	CG4287
Rho1	2.01388e-93	0.450518	0.848	0.655	2.80896e-89	7	Rho1
CG8031	3.01154e-93	0.419763	0.432	0.185	4.2005e-89	7	CG8031
pasi1	1.43365e-92	0.344539	0.36	0.134	1.99966e-88	7	pasi1
l(1)G0289	2.63214e-92	0.436093	0.902	0.768	3.67131e-88	7	l(1)G0289
Zw	7.71545e-92	0.372023	0.356	0.134	1.07615e-87	7	Zw
CG79701	1.60173e-91	0.535134	0.646	0.388	2.2341e-87	7	CG7970
CG12375	1.59144e-89	0.396371	0.442	0.197	2.21975e-85	7	CG12375
scb	1.8779e-89	0.35797	0.342	0.128	2.6193e-85	7	scb
shrb1	5.85223e-89	0.454398	0.7	0.452	8.16269e-85	7	shrb
CG6762	6.40126e-89	0.316641	0.265	0.082	8.92848e-85	7	CG6762
Rab2	6.45799e-89	0.475807	0.692	0.439	9.0076e-85	7	Rab2
Past11	1.62728e-87	0.423786	0.56	0.299	2.26973e-83	7	Past1
CG4080	3.17107e-87	0.369983	0.375	0.149	4.423e-83	7	CG4080
yip2	5.06275e-85	0.45171	0.515	0.264	7.06152e-81	7	yip2
stai1	7.23102e-84	0.477376	0.681	0.394	1.00858e-79	7	stai
Hsp83	7.3776e-84	0.560498	0.981	0.98	1.02903e-79	7	Hsp83
pcs	1.09814e-83	0.413021	0.463	0.217	1.53169e-79	7	pcs
CG1103	1.39642e-83	0.460278	0.55	0.299	1.94773e-79	7	CG1103
Syb	7.93855e-83	0.437539	0.792	0.581	1.10727e-78	7	Syb
bun2	3.24267e-82	0.417592	0.836	0.629	4.52288e-78	7	bun
Tsp42Ef	3.89229e-82	0.373732	0.334	0.127	5.42896e-78	7	Tsp42Ef
Syx17	1.07636e-81	0.272233	0.26	0.084	1.50131e-77	7	Syx17
CG46661	1.44622e-81	0.539378	0.671	0.45	2.01719e-77	7	CG4666
HSPC300	6.44029e-80	0.299569	0.315	0.115	8.98291e-76	7	HSPC300
Rap1	1.17803e-79	0.370141	0.912	0.785	1.64312e-75	7	Rap1
MSBP	1.27462e-79	0.414974	0.631	0.384	1.77784e-75	7	MSBP
Cyt-b5	1.38714e-79	0.429493	0.812	0.635	1.93478e-75	7	Cyt-b5
CG31717	2.48255e-79	0.419061	0.577	0.335	3.46266e-75	7	CG31717
RhoL	3.73214e-79	0.270239	0.265	0.086	5.20558e-75	7	RhoL
CG15602	7.22005e-79	0.329197	0.328	0.126	1.00705e-74	7	CG15602
Rab111	1.98613e-78	0.430197	0.697	0.46	2.77025e-74	7	Rab11
CG7231	4.81509e-78	0.327816	0.269	0.092	6.71609e-74	7	CG7231
Inx32	9.87276e-78	0.437247	0.811	0.602	1.37705e-73	7	Inx3
elm	1.33688e-76	0.420818	0.48	0.249	1.86468e-72	7	elm
Vta1	2.22631e-75	0.394547	0.534	0.287	3.10526e-71	7	Vta1
Snx6	3.58086e-75	0.347148	0.416	0.189	4.99459e-71	7	Snx6
Sar1	5.20581e-75	0.378439	0.883	0.738	7.26107e-71	7	Sar1
CG33970	2.20041e-74	0.279308	0.259	0.089	3.06913e-70	7	CG33970
TMS1	2.49577e-74	0.368697	0.451	0.22	3.4811e-70	7	TMS1
RanBPM	3.82776e-74	0.310002	0.309	0.118	5.33896e-70	7	RanBPM
Rox8	4.74675e-74	0.389072	0.508	0.266	6.62076e-70	7	Rox8
CG15721	2.71224e-73	0.452099	0.709	0.466	3.78304e-69	7	CG1572
sqh1	3.43547e-73	0.406013	0.755	0.537	4.7918e-69	7	sqh
LamC	3.68039e-73	0.387714	0.504	0.266	5.13341e-69	7	LamC
peb	7.49562e-73	0.475171	0.653	0.417	1.04549e-68	7	peb
w1	1.84554e-72	0.415415	0.917	0.826	2.57416e-68	7	w
stck	1.32049e-71	0.42002	0.577	0.334	1.84182e-67	7	stck
CG32486	2.29964e-71	0.353156	0.408	0.186	3.20753e-67	7	CG32486
Chc	3.29584e-71	0.395865	0.613	0.373	4.59704e-67	7	Chc
CG13603	8.0322e-71	0.307792	0.351	0.146	1.12033e-66	7	CG13603
kibra1	8.1176e-71	0.432749	0.585	0.345	1.13224e-66	7	kibra
CG5902	4.63935e-70	0.39509	0.503	0.276	6.47096e-66	7	CG5902
Rheb	5.25365e-70	0.402739	0.603	0.372	7.32779e-66	7	Rheb
CG6770	8.20027e-70	0.356825	0.997	0.976	1.14377e-65	7	CG6770
Rab81	8.25888e-70	0.344999	0.395	0.182	1.15195e-65	7	Rab8
Debcl	8.81685e-70	0.289626	0.283	0.106	1.22977e-65	7	Debcl
ash2	9.49977e-70	0.342236	0.36	0.157	1.32503e-65	7	ash2
CG31523	4.8104e-69	0.313633	0.315	0.128	6.70955e-65	7	CG31523
pck	1.15488e-68	0.305441	0.283	0.107	1.61083e-64	7	pck
2022-09-01	1.71698e-68	0.350356	0.475	0.244	2.39485e-64	7	2022-09-01
Gdh1	2.26e-68	0.367586	0.892	0.743	3.15225e-64	7	Gdh
CG4572	5.99213e-68	0.38468	0.524	0.293	8.35782e-64	7	CG4572
Amacr	9.86893e-68	0.313046	0.289	0.113	1.37652e-63	7	Amacr
Gbeta13F	5.51102e-67	0.347201	0.905	0.784	7.68678e-63	7	Gbeta13F
Paip2	2.15043e-66	0.350489	0.431	0.212	2.99942e-62	7	Paip2
hoe1	3.33285e-66	0.274723	0.271	0.102	4.64866e-62	7	hoe1
Gp150	1.03631e-65	0.406966	0.749	0.544	1.44545e-61	7	Gp150
CG14812	2.30521e-65	0.376355	0.549	0.32	3.21531e-61	7	CG14812
Smg5	1.53216e-64	0.337316	0.417	0.204	2.13706e-60	7	Smg5
blow	9.48082e-64	0.273685	0.27	0.102	1.32238e-59	7	blow
CG4455	3.11776e-63	0.324154	0.385	0.181	4.34865e-59	7	CG4455
mxt	8.28693e-63	0.287658	0.351	0.155	1.15586e-58	7	mxt
drongo	1.79679e-62	0.364609	0.662	0.446	2.50616e-58	7	drongo
CG6983	2.93125e-62	0.295116	0.306	0.127	4.08851e-58	7	CG6983
Dlic	3.1077e-62	0.354144	0.532	0.3	4.33462e-58	7	Dlic
laza1	9.08924e-62	0.334238	0.399	0.194	1.26777e-57	7	laza
Tsp42Ee	1.17223e-61	0.356645	0.86	0.728	1.63502e-57	7	Tsp42Ee
Chmp11	1.82292e-61	0.380426	0.787	0.594	2.54261e-57	7	Chmp1
aph-1	3.4165e-61	0.303717	0.34	0.151	4.76534e-57	7	aph-1
shep	3.89239e-61	0.372958	0.55	0.322	5.4291e-57	7	shep
Src64B	6.61133e-59	0.267661	0.264	0.102	9.22148e-55	7	Src64B
Rab4	2.53245e-58	0.323107	0.5	0.285	3.53226e-54	7	Rab4
Gadd45	6.96166e-58	0.530298	0.619	0.415	9.71013e-54	7	Gadd45
betaTub60D	1.84296e-57	0.373258	0.546	0.332	2.57056e-53	7	betaTub60D
CG14767	3.67946e-57	0.340684	0.525	0.311	5.13211e-53	7	CG14767
cl	1.13565e-56	0.412777	0.793	0.638	1.584e-52	7	cl
Vha100-1	1.71428e-56	0.261933	0.281	0.117	2.39108e-52	7	Vha100-1
alc	2.52739e-56	0.318328	0.472	0.262	3.5252e-52	7	alc
2022-09-02	3.13341e-56	0.356733	0.682	0.473	4.37049e-52	7	2022-09-02
Hsp70Ab	4.92631e-56	0.275196	0.277	0.116	6.87122e-52	7	Hsp70Ab
Tango9	5.40813e-56	0.263169	0.28	0.117	7.54325e-52	7	Tango9
galectin	5.58573e-56	0.310176	0.323	0.146	7.79098e-52	7	galectin
CG1129	4.35824e-55	0.299991	0.325	0.15	6.07888e-51	7	CG1129
CG10623	6.14031e-55	0.456895	0.608	0.421	8.56451e-51	7	CG10623
CG34125	9.07651e-55	0.348224	0.42	0.223	1.26599e-50	7	CG34125
ALiX	5.5504e-54	0.290289	0.38	0.19	7.74169e-50	7	ALiX
CG14184	1.28151e-53	0.283536	0.347	0.165	1.78746e-49	7	CG14184
Snx1	2.49391e-53	0.268215	0.3	0.133	3.4785e-49	7	Snx1
Men-b	7.71792e-53	0.285862	0.424	0.223	1.0765e-48	7	Men-b
CG13887	1.03056e-52	0.345003	0.587	0.381	1.43742e-48	7	CG13887
Snap29	4.05974e-52	0.273671	0.324	0.151	5.66253e-48	7	Snap29
CG9286	5.41966e-52	0.332035	0.451	0.255	7.55934e-48	7	CG9286
crok	7.31504e-52	0.263999	0.278	0.12	1.0203e-47	7	crok
Roc2	8.0748e-52	0.294446	0.423	0.227	1.12627e-47	7	Roc2
PPP1R15	1.79419e-51	0.279914	0.3	0.137	2.50254e-47	7	PPP1R15
Npc1a	4.52603e-51	0.267067	0.334	0.159	6.31291e-47	7	Npc1a
Rab14	7.8563e-51	0.311532	0.463	0.263	1.0958e-46	7	Rab14
zda	9.11543e-51	0.311437	0.428	0.235	1.27142e-46	7	zda
CG7997	2.12726e-50	0.281925	0.263	0.112	2.9671e-46	7	CG7997
Spt-I	2.86599e-48	0.271544	0.339	0.165	3.99748e-44	7	Spt-I
Mob2	1.20607e-47	0.25884	0.335	0.164	1.68223e-43	7	Mob2
puc	1.887e-47	0.332639	0.433	0.244	2.63199e-43	7	puc
CtBP	3.11904e-47	0.313202	0.767	0.587	4.35043e-43	7	CtBP
Prosalpha5	2.42599e-46	0.297018	0.859	0.754	3.38377e-42	7	Prosalpha5
Act5C2	3.62708e-46	0.35823	0.997	0.997	5.05905e-42	7	Act5C
CG10103	6.93978e-46	0.276739	0.37	0.192	9.67961e-42	7	CG10103
CG3638	1.09495e-45	0.293212	0.363	0.187	1.52724e-41	7	CG3638
Csk	1.30759e-45	0.296893	0.386	0.209	1.82382e-41	7	Csk
poly1	5.2903e-45	0.358799	0.645	0.473	7.3789e-41	7	poly
RhoGAP19D	1.75168e-44	0.298602	0.391	0.213	2.44325e-40	7	RhoGAP19D
CG105271	1.9317e-44	0.273094	0.64	0.426	2.69433e-40	7	CG10527
Yippee	5.73656e-44	0.294779	0.462	0.275	8.00135e-40	7	Yippee
S6k	7.13877e-44	0.31305	0.491	0.303	9.95716e-40	7	S6k
Wdr62	2.03107e-43	0.298565	0.437	0.253	2.83293e-39	7	Wdr62
scu	2.58941e-43	0.328345	0.898	0.815	3.61171e-39	7	scu
zip1	5.10304e-42	0.289427	0.799	0.644	7.11772e-38	7	zip
CG2246	6.4442e-42	0.289763	0.425	0.248	8.98837e-38	7	CG2246
Tre11	1.00513e-41	0.309156	0.417	0.243	1.40195e-37	7	Tre1
Cpr	1.59047e-41	0.290133	0.397	0.229	2.21838e-37	7	Cpr
CG2924	1.88383e-41	0.284715	0.406	0.234	2.62756e-37	7	CG2924
mats	2.17185e-41	0.2599	0.395	0.223	3.0293e-37	7	mats
Yp12	3.33887e-41	0.551658	0.923	0.811	4.65706e-37	7	Yp1
Gdi	3.92651e-41	0.291351	0.759	0.615	5.4767e-37	7	Gdi
GstE141	1.10425e-40	0.505919	0.555	0.389	1.54021e-36	7	GstE14
CG34159	2.10969e-40	0.296682	0.441	0.269	2.94259e-36	7	CG34159
CG10672	5.73889e-40	0.257165	0.316	0.164	8.0046e-36	7	CG10672
Gpat4	1.19686e-39	0.293323	0.423	0.253	1.66938e-35	7	Gpat4
CG62181	2.21864e-39	0.27577	0.458	0.279	3.09456e-35	7	CG6218
Diap11	1.16283e-38	0.258642	0.48	0.29	1.62191e-34	7	Diap1
Six4	1.47806e-38	0.335675	0.799	0.672	2.06159e-34	7	Six4
NAT11	8.21744e-38	0.310756	0.671	0.506	1.14617e-33	7	NAT1
kraken	3.50557e-37	0.300576	0.471	0.299	4.88958e-33	7	kraken
ics	1.39764e-36	0.25692	0.5	0.323	1.94943e-32	7	ics
CG15891	2.15523e-36	0.251186	0.322	0.172	3.00612e-32	7	CG15891
Psn	3.51936e-36	0.250126	0.419	0.251	4.9088e-32	7	Psn
atl	9.43708e-35	0.261993	0.405	0.246	1.31628e-30	7	atl
E(spl)malpha-BFM	1.15487e-34	0.277612	0.332	0.183	1.61081e-30	7	E(spl)malpha-BFM
klar	1.59157e-34	0.29393	0.672	0.511	2.21992e-30	7	klar
CG11781	1.75244e-34	0.292675	0.521	0.353	2.4443e-30	7	CG11781
spen1	2.25297e-32	0.264728	0.679	0.514	3.14244e-28	7	spen
CG1890	4.49837e-32	0.287034	0.517	0.356	6.27433e-28	7	CG1890
Shrm	8.38371e-32	0.251498	0.383	0.231	1.16936e-27	7	Shrm
CG31997	4.26314e-31	0.421976	0.342	0.207	5.94623e-27	7	CG31997
AnxB11	6.06557e-31	0.250248	0.445	0.288	8.46025e-27	7	AnxB11
endos	8.35263e-31	0.253985	0.597	0.437	1.16503e-26	7	endos
MtnA	7.76489e-29	0.523596	0.337	0.204	1.08305e-24	7	MtnA
GstD32	2.10581e-28	0.28011	0.841	0.754	2.93718e-24	7	GstD3
Yp23	8.24538e-24	0.335269	0.958	0.903	1.15007e-19	7	Yp2
fabp	4.34049e-17	0.25382	0.728	0.644	6.05412e-13	7	fabp
dhd	0	3.1658	0.992	0.291	0	8	dhd
osk	0	2.70639	0.765	0.11	0	8	osk
wisp	0	2.02543	0.908	0.077	0	8	wisp
pgc	0	1.99175	0.715	0.084	0	8	pgc
CycB	0	1.75474	0.787	0.1	0	8	CycB
yl	0	1.74749	0.71	0.06	0	8	yl
gnu	0	1.54721	0.759	0.056	0	8	gnu
BigH1	0	1.51086	0.754	0.06	0	8	BigH1
alphaTub67C	0	1.50601	0.754	0.069	0	8	alphaTub67C
CG11674	0	1.36992	0.759	0.072	0	8	CG11674
orb	0	1.3327	0.424	0.042	0	8	orb
Prip	0	1.18448	0.724	0.163	0	8	Prip
Jabba	0	1.1468	0.559	0.029	0	8	Jabba
bru1	0	1.08026	0.609	0.059	0	8	bru1
GstE6	0	1.02864	0.601	0.083	0	8	GstE6
CG14545	0	1.02766	0.629	0.084	0	8	CG14545
swa	0	0.852469	0.449	0.018	0	8	swa
stet	0	0.834077	0.469	0.028	0	8	stet
zpg	0	0.807021	0.483	0.039	0	8	zpg
fs(1)Ya	0	0.770833	0.424	0.02	0	8	fs(1)Ya
Pxt	0	0.7448	0.406	0.018	0	8	Pxt
CG10863	0	0.674203	0.383	0.04	0	8	CG10863
CG14036	0	0.656251	0.381	0.036	0	8	CG14036
CG3831	0	0.631939	0.374	0.03	0	8	CG3831
Drep2	0	0.603633	0.334	0.019	0	8	Drep2
exu	0	0.594454	0.341	0.014	0	8	exu
plu	0	0.589532	0.348	0.013	0	8	plu
ZnT35C	0	0.582027	0.319	0.016	0	8	ZnT35C
fs(1)M3	0	0.551614	0.263	0.009	0	8	fs(1)M3
yin	0	0.544292	0.304	0.016	0	8	yin
Gabat	0	0.543299	0.291	0.015	0	8	Gabat
Rab32	0	0.521099	0.276	0.017	0	8	Rab32
Cyp6a19	0	0.516449	0.27	0.01	0	8	Cyp6a19
CG4991	0	0.497056	0.256	0.012	0	8	CG4991
CG10960	0	0.482171	0.265	0.013	0	8	CG10960
CG18190	4.01369e-290	0.5752	0.351	0.035	5.5983e-286	8	CG18190
Idgf6	2.06268e-283	0.80441	0.519	0.083	2.87703e-279	8	Idgf6
CG7091	5.28542e-282	0.445614	0.253	0.017	7.37211e-278	8	CG7091
Ggt-1	1.05106e-277	0.567582	0.339	0.034	1.46602e-273	8	Ggt-1
CycA	1.21371e-248	0.754761	0.451	0.071	1.69288e-244	8	CycA
me31B	5.55661e-248	1.30186	0.805	0.291	7.75035e-244	8	me31B
rdog	3.64915e-227	0.440031	0.256	0.023	5.08983e-223	8	rdog
26-29-p	1.47757e-218	1.22968	0.844	0.407	2.06091e-214	8	26-29-p
CG10254	4.53549e-214	0.859851	0.381	0.059	6.32611e-210	8	CG10254
smg	5.1997e-202	0.560219	0.298	0.037	7.25254e-198	8	smg
His3.3B	1.8355e-174	1.10654	0.882	0.535	2.56015e-170	8	His3.3B
rdx	6.22092e-174	0.868652	0.557	0.155	8.67694e-170	8	rdx
lok	2.11302e-171	0.953889	0.496	0.124	2.94724e-167	8	lok
Gapdh2	3.93678e-170	1.0635	0.872	0.546	5.49102e-166	8	Gapdh2
Pen1	6.14738e-169	0.774677	0.569	0.157	8.57436e-165	8	Pen
CG42259	5.4503e-166	0.569677	0.384	0.074	7.60207e-162	8	CG42259
RpS5b	4.76063e-164	0.738736	0.997	0.977	6.64013e-160	8	RpS5b
Sod3	3.06242e-152	0.917968	0.704	0.294	4.27147e-148	8	Sod3
CG7840	1.37108e-150	0.765246	0.561	0.178	1.91238e-146	8	CG7840
tral	5.83402e-145	0.966603	0.817	0.452	8.1373e-141	8	tral
gcl	1.65747e-131	0.469455	0.308	0.058	2.31184e-127	8	gcl
Gip	5.74826e-127	0.426886	0.306	0.06	8.01768e-123	8	Gip
RpS10a	1.36771e-123	0.529671	0.291	0.055	1.90768e-119	8	RpS10a
hoip1	1.3883e-120	0.632744	0.995	0.923	1.93641e-116	8	hoip
CG81801	3.4036e-118	0.477078	0.329	0.073	4.74735e-114	8	CG8180
Nap1	6.86009e-114	0.493521	0.998	0.978	9.56846e-110	8	Nap1
CG6287	1.26523e-112	0.685568	0.662	0.294	1.76474e-108	8	CG6287
CG12811	6.01332e-106	0.433299	0.348	0.085	8.38738e-102	8	CG12811
step	1.18433e-105	0.37943	0.263	0.051	1.6519e-101	8	step
glec	3.33155e-102	0.744491	0.556	0.22	4.64684e-98	8	glec
ftz-f11	4.91926e-99	0.815027	0.724	0.376	6.86139e-95	8	ftz-f1
Eip55E	4.39768e-98	0.5446	0.458	0.155	6.13389e-94	8	Eip55E
G9a	2.25099e-97	0.571693	0.416	0.132	3.13968e-93	8	G9a
Sms	4.47935e-90	0.396308	0.263	0.059	6.24779e-86	8	Sms
Tpi	7.51298e-88	0.717322	0.832	0.604	1.04791e-83	8	Tpi
E23	4.3662e-87	0.417431	0.288	0.07	6.08998e-83	8	E23
PyK	4.27808e-86	0.681299	0.694	0.401	5.96707e-82	8	PyK
Smn	1.23306e-83	0.418177	0.336	0.096	1.71987e-79	8	Smn
CG32625	3.38604e-81	0.34346	0.265	0.062	4.72285e-77	8	CG32625
Baldspot	8.34801e-80	0.390447	0.283	0.074	1.16438e-75	8	Baldspot
Pglym78	5.56596e-79	0.623213	0.814	0.576	7.76339e-75	8	Pglym78
CG7627	1.72689e-78	0.407818	0.334	0.1	2.40867e-74	8	CG7627
grp	1.66934e-77	0.435827	0.309	0.088	2.3284e-73	8	grp
CG13773	4.61308e-77	0.471138	0.426	0.157	6.43432e-73	8	CG13773
stai2	1.56031e-72	0.554517	0.732	0.401	2.17632e-68	8	stai
Cdk4	8.75206e-70	0.390986	0.306	0.091	1.22074e-65	8	Cdk4
lola	2.53654e-67	0.421558	0.339	0.113	3.53797e-63	8	lola
ced-6	4.23978e-66	0.527012	0.408	0.161	5.91364e-62	8	ced-6
Cbs	6.26369e-66	0.38922	0.329	0.106	8.73659e-62	8	Cbs
CG31673	1.25984e-65	0.384133	0.316	0.103	1.75722e-61	8	CG31673
skd	1.46416e-64	0.547121	0.473	0.212	2.04221e-60	8	skd
Ald11	2.55418e-64	0.59085	0.677	0.412	3.56257e-60	8	Ald1
Cyp1	3.3056e-62	0.253873	1	1	4.61066e-58	8	Cyp1
CG11899	4.42087e-61	0.440637	0.468	0.205	6.16623e-57	8	CG11899
polo	6.96449e-60	0.3278	0.253	0.072	9.71407e-56	8	polo
CG46385	2.33243e-59	0.607734	0.666	0.417	3.25328e-55	8	CG46385
Cyp6v1	9.06695e-58	0.486425	0.446	0.202	1.26466e-53	8	Cyp6v1
CG40045	2.64803e-56	0.487773	0.902	0.784	3.69347e-52	8	CG40045
Aldh1	8.45055e-56	0.470131	0.636	0.373	1.17868e-51	8	Aldh
Mdh1	1.13589e-55	0.437615	0.913	0.829	1.58433e-51	8	Mdh1
BthD	3.71877e-54	0.567417	0.28	0.094	5.18694e-50	8	BthD
Pcd	8.84583e-53	0.384771	0.344	0.135	1.23382e-48	8	Pcd
CG15771	2.52634e-52	0.369491	0.328	0.124	3.52374e-48	8	CG15771
CG15093	6.00562e-52	0.477808	0.722	0.483	8.37664e-48	8	CG15093
Arl6IP1	9.22848e-52	0.311213	0.276	0.092	1.28719e-47	8	Arl6IP1
Jafrac11	3.10312e-50	0.418786	0.97	0.918	4.32823e-46	8	Jafrac1
Stlk	2.82109e-49	0.349226	0.301	0.111	3.93486e-45	8	Stlk
stg2	2.15477e-48	0.429372	0.724	0.439	3.00548e-44	8	stg
kuk1	2.29022e-48	0.36905	0.346	0.138	3.1944e-44	8	kuk
Gapdh11	5.42838e-48	0.431414	0.877	0.764	7.5715e-44	8	Gapdh1
Rcc1	5.9909e-48	0.526555	0.474	0.247	8.35611e-44	8	Rcc1
UK114	1.65556e-47	0.431707	0.444	0.224	2.30917e-43	8	UK114
Trx-2	1.97075e-46	0.433417	0.894	0.791	2.7488e-42	8	Trx-2
Fkbp39	7.44185e-46	0.398431	0.94	0.822	1.03799e-41	8	Fkbp39
NaPi-III	1.38415e-44	0.354275	0.319	0.13	1.93061e-40	8	NaPi-III
Fdh	1.08686e-43	0.412314	0.755	0.563	1.51595e-39	8	Fdh
Eno1	1.71998e-43	0.414597	0.882	0.775	2.39903e-39	8	Eno
l(3)02640	2.93977e-43	0.377351	0.388	0.182	4.10039e-39	8	l(3)02640
Tao	6.40148e-43	0.387137	0.288	0.113	8.92878e-39	8	Tao
Mkp3	5.15445e-41	0.407581	0.577	0.351	7.18942e-37	8	Mkp3
CG19431	2.06326e-40	0.386449	0.774	0.565	2.87783e-36	8	CG1943
Surf6	5.65863e-40	0.406864	0.507	0.288	7.89266e-36	8	Surf6
GstO1	9.06088e-40	0.282791	0.258	0.096	1.26381e-35	8	GstO1
Arp2	2.54854e-39	0.326813	0.253	0.096	3.5547e-35	8	Arp2
nero	1.14329e-38	0.362286	0.363	0.17	1.59467e-34	8	nero
tzn	1.46102e-38	0.432458	0.529	0.332	2.03783e-34	8	tzn
CG9917	6.22196e-36	0.340081	0.3	0.13	8.6784e-32	8	CG9917
gus	7.45379e-36	0.382559	0.381	0.194	1.03965e-31	8	gus
mRpL12	2.2722e-35	0.409454	0.702	0.542	3.16926e-31	8	mRpL12
pcs1	2.91205e-35	0.377029	0.423	0.226	4.06173e-31	8	pcs
Top2	5.8664e-35	0.351235	0.326	0.151	8.18245e-31	8	Top2
CkIIalpha	6.28431e-35	0.437549	0.744	0.581	8.76535e-31	8	CkIIalpha
mei-P26	3.40699e-34	0.438809	0.361	0.183	4.75207e-30	8	mei-P26
endos1	1.11126e-33	0.378489	0.642	0.44	1.54999e-29	8	endos
Usp7	5.92753e-33	0.301914	0.343	0.165	8.26773e-29	8	Usp7
fabp1	5.99019e-32	0.341995	0.8	0.644	8.35511e-28	8	fabp
Ssb-c31a	7.45474e-32	0.386027	0.516	0.326	1.03979e-27	8	Ssb-c31a
slpr	7.6048e-32	0.402555	0.346	0.177	1.06072e-27	8	slpr
Vha131	1.17382e-31	0.262782	0.95	0.918	1.63724e-27	8	Vha13
CCT2	4.65939e-31	0.348994	0.795	0.677	6.49892e-27	8	CCT2
CD98hc	5.80662e-30	0.286962	0.341	0.171	8.09908e-26	8	CD98hc
CG17896	1.18836e-29	0.361879	0.602	0.418	1.65752e-25	8	CG17896
Got21	1.27186e-29	0.373015	0.656	0.488	1.77399e-25	8	Got2
lost	3.14774e-29	0.341034	0.899	0.826	4.39047e-25	8	lost
UbcE2H	8.19613e-29	0.298115	0.26	0.115	1.1432e-24	8	UbcE2H
CG8507	8.55661e-29	0.39727	0.579	0.411	1.19348e-24	8	CG8507
CG5757	9.62799e-29	0.288204	0.361	0.185	1.34291e-24	8	CG5757
Dph5	1.25189e-28	0.351099	0.762	0.623	1.74614e-24	8	Dph5
Acph-1	2.32649e-28	0.285496	0.281	0.131	3.24499e-24	8	Acph-1
l(3)73Ah	3.30659e-28	0.282643	0.295	0.14	4.61203e-24	8	l(3)73Ah
Fdx2	5.82247e-28	0.348032	0.393	0.226	8.12118e-24	8	Fdx2
akirin	3.15399e-27	0.360338	0.86	0.783	4.39918e-23	8	akirin
Ssdp	3.50852e-27	0.338579	0.371	0.204	4.89369e-23	8	Ssdp
Vha551	1.96654e-26	0.363148	0.74	0.613	2.74293e-22	8	Vha55
mbm	3.85957e-26	0.283676	0.313	0.16	5.38333e-22	8	mbm
mbt	6.26022e-26	0.262518	0.273	0.13	8.73176e-22	8	mbt
Arpc2	6.72741e-26	0.364684	0.448	0.284	9.38339e-22	8	Arpc2
EMRE	1.92786e-25	0.350581	0.398	0.236	2.68898e-21	8	EMRE
pum	5.6334e-25	0.403538	0.484	0.33	7.85747e-21	8	pum
CG93281	1.04082e-24	0.255115	0.28	0.135	1.45174e-20	8	CG9328
CG14210	2.06667e-24	0.340733	0.621	0.458	2.8826e-20	8	CG14210
msk	5.43045e-24	0.340893	0.537	0.376	7.5744e-20	8	msk
HmgD1	9.79781e-24	0.27066	0.777	0.642	1.3666e-19	8	HmgD
Nurf-38	1.20065e-23	0.299918	0.822	0.73	1.67467e-19	8	Nurf-38
Tsp74F	1.35479e-23	0.365025	0.479	0.325	1.88967e-19	8	Tsp74F
Tif-IA	2.30294e-23	0.30064	0.376	0.221	3.21214e-19	8	Tif-IA
CG17202	3.91742e-23	0.334216	0.536	0.381	5.46401e-19	8	CG17202
Nph	6.43081e-23	0.261913	0.912	0.864	8.96969e-19	8	Nph
CG5569	7.90659e-23	0.266761	0.371	0.216	1.10281e-18	8	CG5569
Pgd1	9.68772e-23	0.27688	0.323	0.178	1.35124e-18	8	Pgd
GC1	1.03263e-22	0.272948	0.303	0.163	1.44031e-18	8	GC1
Hsp60A	5.23181e-22	0.284355	0.864	0.779	7.29733e-18	8	Hsp60A
Bka	5.31386e-22	0.321076	0.374	0.226	7.41178e-18	8	Bka
Unr	6.70526e-22	0.376666	0.681	0.549	9.3525e-18	8	Unr
His2Av1	7.08914e-22	0.279534	0.84	0.767	9.88793e-18	8	His2Av
SpdS	2.41091e-21	0.260162	0.656	0.511	3.36274e-17	8	SpdS
Mgstl	3.08567e-21	0.283095	0.329	0.189	4.3039e-17	8	Mgstl
CG15168	4.00911e-21	0.296473	0.511	0.36	5.59191e-17	8	CG15168
CG32767	4.64645e-21	0.357751	0.331	0.193	6.48087e-17	8	CG32767
tko	5.7962e-21	0.287105	0.661	0.527	8.08454e-17	8	tko
cg	1.85157e-20	0.250831	0.29	0.156	2.58257e-16	8	cg
mtgo	2.08104e-20	0.321011	0.368	0.224	2.90264e-16	8	mtgo
Pgm1	3.6114e-20	0.268171	0.398	0.253	5.03718e-16	8	Pgm1
CG44774	1.15676e-19	0.274106	0.429	0.28	1.61344e-15	8	CG44774
Mal-A51	3.75316e-19	0.257837	0.333	0.197	5.23491e-15	8	Mal-A5
Cpsf5	5.6811e-19	0.260686	0.389	0.248	7.92399e-15	8	Cpsf5
vih	1.01997e-18	0.307051	0.403	0.264	1.42265e-14	8	vih
cindr	1.80994e-18	0.271975	0.549	0.398	2.52451e-14	8	cindr
CCT8	2.32208e-18	0.25031	0.804	0.714	3.23884e-14	8	CCT8
Gclm	3.41874e-18	0.299185	0.456	0.315	4.76846e-14	8	Gclm
eIF4E1	3.4333e-18	0.304308	0.787	0.714	4.78877e-14	8	eIF4E1
CG7182	3.47672e-18	0.283705	0.388	0.254	4.84933e-14	8	CG7182
CG28651	4.52763e-18	0.28803	0.466	0.323	6.31514e-14	8	CG2865
Dp	7.0005e-18	0.279698	0.354	0.219	9.7643e-14	8	Dp
mats1	1.48548e-17	0.286471	0.358	0.229	2.07195e-13	8	mats
CG12107	1.70254e-17	0.289077	0.486	0.35	2.3747e-13	8	CG12107
CanB2	2.8595e-17	0.322882	0.541	0.42	3.98843e-13	8	CanB2
dre4	5.82053e-17	0.330872	0.276	0.161	8.11848e-13	8	dre4
CG11980	8.76886e-17	0.257371	0.364	0.234	1.22308e-12	8	CG11980
AIMP1	1.19119e-16	0.268595	0.454	0.326	1.66147e-12	8	AIMP1
san	1.62838e-16	0.26117	0.411	0.274	2.27127e-12	8	san
CG33129	1.78178e-16	0.302423	0.694	0.585	2.48523e-12	8	CG33129
Ccdc58	7.65438e-16	0.286195	0.569	0.445	1.06763e-11	8	Ccdc58
spt4	4.25986e-15	0.254885	0.411	0.289	5.94166e-11	8	spt4
Hrb27C	6.19439e-15	0.269823	0.656	0.561	8.63994e-11	8	Hrb27C
Phf5a	7.07372e-15	0.253275	0.526	0.413	9.86642e-11	8	Phf5a
JIL-1	2.422e-14	0.271736	0.336	0.225	3.37821e-10	8	JIL-1
Chc1	3.45311e-12	0.330545	0.479	0.385	4.8164e-08	8	Chc
shep1	7.09849e-11	0.293848	0.434	0.333	9.90097e-07	8	shep
BicD	2.64585e-08	0.339536	0.271	0.2	0.000369043	8	BicD
CG1648	0	1.51505	0.813	0.079	0	9	CG1648
CG13403	0	1.04531	0.432	0.023	0	9	CG13403
CG10311	0	0.914057	0.472	0.027	0	9	CG10311
nvy	0	0.595908	0.272	0.015	0	9	nvy
ringer	9.88885e-299	0.523484	0.274	0.017	1.3793e-294	9	ringer
CG463391	2.17634e-234	0.903033	0.55	0.105	3.03555e-230	9	CG46339
GILT2	6.01175e-234	0.592762	0.358	0.042	8.38518e-230	9	GILT2
CG318081	2.25398e-189	1.02445	0.63	0.173	3.14385e-185	9	CG31808
SPARC1	5.54302e-165	1.07248	0.945	0.557	7.73141e-161	9	SPARC
GstT4	1.62622e-143	0.538708	0.299	0.046	2.26826e-139	9	GstT4
CG11686	1.26961e-136	0.428397	0.261	0.037	1.77086e-132	9	CG11686
CG9336	2.39164e-126	0.754738	0.411	0.098	3.33586e-122	9	CG9336
zfh1	3.12417e-124	0.454492	0.274	0.045	4.35759e-120	9	zfh1
robo2	3.76145e-124	0.502287	0.33	0.064	5.24647e-120	9	robo2
CG15722	1.9938e-122	0.898244	0.838	0.47	2.78095e-118	9	CG1572
CG13631	3.97843e-121	0.563733	0.345	0.071	5.54911e-117	9	CG13631
CG105272	3.01719e-111	0.822578	0.8	0.428	4.20837e-107	9	CG10527
Prip1	4.18237e-110	0.681946	0.533	0.173	5.83357e-106	9	Prip
CG93282	1.26308e-101	0.646491	0.44	0.13	1.76174e-97	9	CG9328
Idgf61	8.96022e-99	0.566109	0.36	0.091	1.24977e-94	9	Idgf6
CG13377	7.45942e-94	0.540273	0.358	0.096	1.04044e-89	9	CG13377
glec1	8.76578e-84	0.65823	0.543	0.222	1.22265e-79	9	glec
stl1	7.34774e-79	0.768797	0.714	0.4	1.02486e-74	9	stl
hdc1	3.08301e-75	0.635631	0.625	0.304	4.30018e-71	9	hdc
aqz1	1.39451e-70	0.539222	0.975	0.921	1.94506e-66	9	aqz
fz21	6.53238e-65	0.503695	0.35	0.115	9.11136e-61	9	fz2
mamo1	6.67745e-64	0.591367	0.737	0.468	9.3137e-60	9	mamo
CG15211	1.51477e-61	0.420588	0.253	0.068	2.11279e-57	9	CG15211
Glut4EF2	8.57567e-57	0.511105	0.41	0.168	1.19614e-52	9	Glut4EF
Atf3	6.11383e-54	0.429082	0.295	0.096	8.52758e-50	9	Atf3
CG304601	1.30062e-52	0.530542	0.495	0.241	1.8141e-48	9	CG30460
CG99321	4.68573e-51	0.446336	0.381	0.152	6.53566e-47	9	CG9932
betaTub56D1	1.44508e-45	0.402192	0.985	0.956	2.01559e-41	9	betaTub56D
CG142072	5.8648e-45	0.477681	0.512	0.267	8.18022e-41	9	CG14207
trol1	1.17538e-42	0.415192	0.876	0.755	1.63942e-38	9	trol
cindr1	7.42345e-41	0.504336	0.615	0.396	1.03542e-36	9	cindr
Frl2	9.94132e-39	0.433729	0.659	0.429	1.38661e-34	9	Frl
ct1	3.5095e-37	0.424186	0.446	0.227	4.89505e-33	9	ct
DOR2	2.26662e-35	0.399635	0.514	0.289	3.16148e-31	9	DOR
Chd642	1.91946e-33	0.349256	0.909	0.824	2.67726e-29	9	Chd64
LamC1	2.70996e-32	0.490693	0.459	0.275	3.77985e-28	9	LamC
Col4a13	1.44636e-31	0.310571	0.937	0.84	2.01738e-27	9	Col4a1
chrb	3.15034e-31	0.448719	0.451	0.264	4.39409e-27	9	chrb
E(spl)m3-HLH2	1.06979e-28	0.416759	0.825	0.712	1.49214e-24	9	E(spl)m3-HLH
dally	1.61045e-27	0.411747	0.442	0.27	2.24625e-23	9	dally
Nrg	2.59543e-27	0.342644	0.291	0.138	3.62011e-23	9	Nrg
Sirup2	8.6093e-27	0.281943	0.895	0.813	1.20083e-22	9	Sirup
stai3	2.00712e-26	0.405045	0.6	0.407	2.79953e-22	9	stai
Kank1	2.61003e-25	0.378273	0.469	0.295	3.64047e-21	9	Kank
Nuak1	4.03696e-25	0.417152	0.425	0.261	5.63075e-21	9	Nuak1
CG13917	4.2607e-24	0.404275	0.528	0.37	5.94282e-20	9	CG13917
CG34325	1.82765e-23	0.410419	0.43	0.277	2.5492e-19	9	CG34325
rgn1	3.1105e-23	0.411067	0.501	0.341	4.33852e-19	9	rgn
Xrp1	3.79872e-22	0.349701	0.651	0.511	5.29845e-18	9	Xrp1
InR	5.21624e-22	0.368355	0.345	0.197	7.27562e-18	9	InR
CG150981	3.37072e-21	0.307068	0.81	0.745	4.70148e-17	9	CG15098
Clic	1.12027e-20	0.370701	0.47	0.323	1.56255e-16	9	Clic
ps1	5.60235e-20	0.31221	0.697	0.554	7.81416e-16	9	ps
spen2	1.08582e-19	0.343536	0.64	0.521	1.5145e-15	9	spen
aru	1.6897e-19	0.268066	0.255	0.128	2.35679e-15	9	aru
kibra2	2.63439e-19	0.359725	0.499	0.357	3.67445e-15	9	kibra
babos1	3.28732e-19	0.30787	0.771	0.661	4.58516e-15	9	babos
Pdcd41	5.89091e-18	0.286938	0.672	0.567	8.21665e-14	9	Pdcd4
Pka-R21	2.73768e-16	0.320053	0.335	0.206	3.81851e-12	9	Pka-R2
crol1	2.09173e-15	0.310438	0.59	0.484	2.91754e-11	9	crol
Imp1	2.15777e-15	0.291055	0.737	0.675	3.00965e-11	9	Imp
zip2	4.18953e-15	0.300978	0.731	0.652	5.84356e-11	9	zip
AnxB91	8.14656e-15	0.260139	0.339	0.213	1.13628e-10	9	AnxB9
Lk61	9.40696e-15	0.271623	0.737	0.681	1.31208e-10	9	Lk6
Trf2	3.24114e-11	0.270583	0.354	0.253	4.52074e-07	9	Trf2
Diap12	5.25492e-08	0.25806	0.373	0.3	0.000732956	9	Diap1
CG2233	0	1.27401	0.56	0.046	0	10	CG2233
CG14072	0	1.2206	0.61	0.024	0	10	CG14072
CG3168	0	0.742557	0.411	0.032	0	10	CG3168
Npc2f	0	0.659476	0.326	0.012	0	10	Npc2f
Wnt4	0	0.60012	0.27	0.008	0	10	Wnt4
Vago	0	0.507806	0.258	0.009	0	10	Vago
Hexo2	4.39342e-224	0.688299	0.35	0.035	6.12794e-220	10	Hexo2
NLaz	6.12905e-216	1.0545	0.435	0.058	8.54879e-212	10	NLaz
GstT41	1.60014e-161	0.648444	0.345	0.047	2.23188e-157	10	GstT4
Tsp42Ed	1.3047e-149	0.511407	0.27	0.03	1.81979e-145	10	Tsp42Ed
IP3K2	2.30331e-138	0.517002	0.293	0.039	3.21266e-134	10	IP3K2
CG42501	1.8104e-135	1.01079	0.903	0.466	2.52515e-131	10	CG4250
Nrt	1.02205e-133	0.485085	0.267	0.033	1.42556e-129	10	Nrt
CG42342	3.16262e-101	0.497798	0.262	0.042	4.41122e-97	10	CG42342
Timp	8.2523e-101	0.940401	0.667	0.281	1.15103e-96	10	Timp
Prx2540-1	2.28341e-96	0.602052	0.293	0.055	3.1849e-92	10	Prx2540-1
CG15784	5.33851e-90	0.857292	0.6	0.227	7.44615e-86	10	CG15784
Sirup3	1.31613e-86	0.717012	0.981	0.811	1.83573e-82	10	Sirup
CG425661	5.43064e-79	0.576443	0.53	0.183	7.57465e-75	10	CG42566
SPARC2	1.86877e-70	0.661183	0.898	0.561	2.60656e-66	10	SPARC
fax2	1.64152e-65	0.635516	0.78	0.446	2.28959e-61	10	fax
CG301951	5.87606e-53	0.385853	0.305	0.088	8.19593e-49	10	CG30195
CG11825	6.43355e-52	0.510463	0.345	0.115	8.97352e-48	10	CG11825
CG44041	4.86569e-47	0.501343	0.39	0.149	6.78666e-43	10	CG4404
CG150982	3.47595e-45	0.533159	0.891	0.743	4.84826e-41	10	CG15098
CG138682	1.69715e-40	0.509474	0.35	0.138	2.36719e-36	10	CG13868
CG71941	2.4604e-35	0.461321	0.433	0.21	3.43176e-31	10	CG7194
hdc2	3.33113e-35	0.47433	0.558	0.308	4.64626e-31	10	hdc
CG36381	5.56022e-34	0.428478	0.407	0.193	7.75539e-30	10	CG3638
Cys1	3.86572e-33	0.366683	0.331	0.132	5.39191e-29	10	Cys
CG67701	1.03188e-31	0.311298	0.995	0.977	1.43927e-27	10	CG6770
aqz2	2.36226e-31	0.336071	0.967	0.922	3.29489e-27	10	aqz
Xrp11	7.70796e-31	0.489617	0.704	0.51	1.07511e-26	10	Xrp1
miple21	1.20227e-30	0.452207	0.693	0.491	1.67693e-26	10	miple2
Gadd451	6.66361e-30	0.437267	0.629	0.423	9.2944e-26	10	Gadd45
CG427971	7.33086e-29	0.440744	0.421	0.214	1.02251e-24	10	CG42797
stai4	1.07906e-28	0.345771	0.667	0.407	1.50507e-24	10	stai
CG100821	1.68134e-27	0.398657	0.345	0.163	2.34513e-23	10	CG10082
Pdcd42	3.3892e-26	0.411232	0.733	0.566	4.72726e-22	10	Pdcd4
babos2	3.98922e-26	0.394059	0.804	0.661	5.56417e-22	10	babos
stv1	5.43424e-26	0.440146	0.66	0.497	7.57968e-22	10	stv
kek1	6.61481e-26	0.401644	0.778	0.623	9.22634e-22	10	kek1
GstS12	6.16309e-25	0.460035	0.489	0.299	8.59627e-21	10	GstS1
Ccdc85	8.37161e-25	0.335278	0.296	0.135	1.16767e-20	10	Ccdc85
Lk62	2.43667e-21	0.364749	0.799	0.68	3.39867e-17	10	Lk6
ftz-f12	1.80199e-20	0.361704	0.548	0.384	2.51342e-16	10	ftz-f1
Aldh2	7.01418e-20	0.397641	0.548	0.378	9.78337e-16	10	Aldh
Gclm1	1.03728e-18	0.400075	0.478	0.316	1.4468e-14	10	Gclm
CG72202	2.03104e-18	0.325377	0.631	0.469	2.83289e-14	10	CG7220
E(spl)m3-HLH3	2.15541e-18	0.340983	0.823	0.713	3.00637e-14	10	E(spl)m3-HLH
Fdh1	2.78643e-18	0.346258	0.714	0.566	3.88651e-14	10	Fdh
CG142073	5.46605e-18	0.369831	0.435	0.271	7.62405e-14	10	CG14207
Eip93F1	8.15816e-18	0.316788	0.374	0.221	1.1379e-13	10	Eip93F
FER	1.79282e-17	0.324938	0.277	0.141	2.50063e-13	10	FER
Gapdh12	2.92935e-17	0.297753	0.835	0.766	4.08585e-13	10	Gapdh1
E(spl)m2-BFM1	2.96896e-17	0.323296	0.258	0.126	4.1411e-13	10	E(spl)m2-BFM
Frl3	4.44552e-17	0.337403	0.591	0.433	6.20061e-13	10	Frl
trx	1.7979e-15	0.29885	0.296	0.163	2.50771e-11	10	trx
Ald12	1.86521e-15	0.350605	0.567	0.418	2.60159e-11	10	Ald1
mnb1	5.20125e-15	0.38401	0.454	0.325	7.25471e-11	10	mnb
ps2	8.22106e-15	0.317644	0.671	0.556	1.14667e-10	10	ps
Argk1	1.74395e-14	0.333837	0.579	0.434	2.43246e-10	10	Argk
Fas21	4.53394e-14	0.337312	0.574	0.437	6.32394e-10	10	Fas2
CG422401	1.42978e-13	0.337149	0.463	0.332	1.99426e-09	10	CG42240
CG59461	3.54028e-13	0.33656	0.478	0.356	4.93798e-09	10	CG5946
CG7530	1.73208e-12	0.297076	0.366	0.241	2.41591e-08	10	CG7530
Inos1	5.73987e-12	0.319341	0.435	0.316	8.00597e-08	10	Inos
CG304602	6.05853e-12	0.283225	0.374	0.246	8.45044e-08	10	CG30460
Prosap	1.30752e-11	0.253138	0.7	0.611	1.82374e-07	10	Prosap
Smr	9.90244e-11	0.288312	0.511	0.404	1.38119e-06	10	Smr
Thor1	2.18082e-10	0.280917	0.553	0.44	3.04181e-06	10	Thor
stg3	6.88935e-10	0.336859	0.553	0.447	9.60927e-06	10	stg
crp	6.90316e-10	0.303594	0.409	0.303	9.62852e-06	10	crp
CG324861	1.3529e-09	0.257171	0.3	0.198	1.88702e-05	10	CG32486
aay	4.75262e-09	0.274416	0.461	0.37	6.62895e-05	10	aay
l(1)G01931	5.29539e-08	0.258614	0.473	0.383	0.000738601	10	l(1)G0193
RpS19b	0	1.24071	0.568	0.019	0	11	RpS19b
RpS10a1	0	1.22745	0.687	0.047	0	11	RpS10a
bru11	0	1.18231	0.685	0.064	0	11	bru1
CG326251	0	1.0702	0.63	0.055	0	11	CG32625
CG14932	0	1.00632	0.496	0.005	0	11	CG14932
vas	0	0.690229	0.429	0.027	0	11	vas
ovo	0	0.661277	0.377	0.021	0	11	ovo
cona	0	0.654349	0.318	0.004	0	11	cona
stil	0	0.643231	0.39	0.019	0	11	stil
CG9926	6.52359e-305	0.470823	0.273	0.013	9.09911e-301	11	CG9926
moon	2.16374e-277	0.481723	0.263	0.014	3.01799e-273	11	moon
CG5194	2.35696e-261	0.416573	0.256	0.014	3.28749e-257	11	CG5194
zpg1	1.72085e-259	0.726984	0.437	0.045	2.40024e-255	11	zpg
BigH11	2.26623e-216	0.796835	0.514	0.075	3.16094e-212	11	BigH1
BthD1	1.15078e-209	0.921111	0.543	0.089	1.60511e-205	11	BthD
stet1	8.93034e-173	0.491216	0.328	0.037	1.2456e-168	11	stet
Smn1	1.85082e-169	0.732404	0.506	0.095	2.58153e-165	11	Smn
CG140361	1.56468e-165	0.539836	0.337	0.042	2.18242e-161	11	CG14036
CG4570	1.39906e-159	0.549747	0.36	0.049	1.95141e-155	11	CG4570
Ssb-c31a1	2.08136e-150	1.0121	0.814	0.321	2.90308e-146	11	Ssb-c31a
RpS5b1	4.64534e-142	0.903129	0.998	0.977	6.47932e-138	11	RpS5b
CG181901	1.48504e-135	0.445729	0.303	0.04	2.07134e-131	11	CG18190
CG10063	1.33888e-118	0.549436	0.283	0.041	1.86747e-114	11	CG10063
msd1	2.85175e-115	0.499037	0.345	0.06	3.97762e-111	11	msd1
gnu1	4.51976e-114	0.451506	0.39	0.074	6.30416e-110	11	gnu
Cndp2	2.65884e-112	0.431191	0.3	0.047	3.70855e-108	11	Cndp2
Nnf1a1	7.20775e-110	0.550477	0.464	0.108	1.00534e-105	11	Nnf1a
SkpA	2.80816e-108	0.823199	0.958	0.763	3.91682e-104	11	SkpA
CG116741	1.09602e-107	0.543155	0.417	0.09	1.52873e-103	11	CG11674
E(spl)m7-HLH	5.40339e-100	0.899373	0.454	0.12	7.53666e-96	11	E(spl)m7-HLH
RPA21	2.58545e-97	0.727006	0.556	0.181	3.60619e-93	11	RPA2
Fkbp391	3.38164e-94	0.685821	0.965	0.822	4.71671e-90	11	Fkbp39
wisp1	2.68926e-91	0.414769	0.419	0.1	3.75098e-87	11	wisp
CG9705	1.43392e-88	0.52854	0.397	0.098	2.00003e-84	11	CG9705
CG145451	1.27939e-86	0.48086	0.397	0.096	1.78449e-82	11	CG14545
Df311	5.13656e-86	0.658656	0.998	0.951	7.16447e-82	11	Df31
Incenp	1.68538e-83	0.423222	0.335	0.072	2.35076e-79	11	Incenp
TfIIA-S	3.8975e-83	0.799419	0.844	0.536	5.43623e-79	11	TfIIA-S
RPA31	1.89136e-78	0.719588	0.69	0.323	2.63807e-74	11	RPA3
HmgD2	7.27631e-78	0.811181	0.906	0.641	1.0149e-73	11	HmgD
CG19432	1.33532e-74	0.749545	0.873	0.565	1.86251e-70	11	CG1943
Pdcd43	3.43748e-73	0.788998	0.849	0.563	4.79459e-69	11	Pdcd4
Rcd5	7.5978e-73	0.493592	0.422	0.128	1.05974e-68	11	Rcd5
Chrac-14	2.04797e-68	0.533656	0.464	0.157	2.85651e-64	11	Chrac-14
orb1	5.8043e-68	0.360155	0.253	0.051	8.09583e-64	11	orb
lok1	7.93168e-67	0.487751	0.417	0.131	1.10631e-62	11	lok
D11	9.61166e-65	0.628343	0.878	0.664	1.34063e-60	11	D1
fal	1.17768e-64	0.37525	0.253	0.055	1.64263e-60	11	fal
His4r1	3.04178e-64	0.437461	1	0.999	4.24267e-60	11	His4r
HP4	5.55881e-62	0.592464	0.578	0.26	7.75342e-58	11	HP4
glu	1.27101e-61	0.434564	0.36	0.103	1.77281e-57	11	glu
RfC41	3.00723e-60	0.6277	0.568	0.25	4.19449e-56	11	RfC4
CG8223	4.16052e-60	0.457422	0.439	0.15	5.80309e-56	11	CG8223
akirin1	1.90708e-58	0.5786	0.938	0.782	2.66e-54	11	akirin
HipHop	1.68047e-57	0.461673	0.397	0.132	2.34392e-53	11	HipHop
piwi1	2.3446e-56	0.469584	0.422	0.146	3.27025e-52	11	piwi
dUTPase1	1.05455e-55	0.654939	0.923	0.755	1.47088e-51	11	dUTPase
Lsm12a1	3.07632e-55	0.568408	0.844	0.581	4.29085e-51	11	Lsm12a
mnb2	4.32982e-55	0.549483	0.638	0.321	6.03923e-51	11	mnb
CG10880	5.10979e-54	0.438373	0.392	0.134	7.12713e-50	11	CG10880
ball1	1.1354e-53	0.437402	0.362	0.116	1.58366e-49	11	ball
CG8300	3.16703e-53	0.524642	0.442	0.167	4.41737e-49	11	CG8300
Neos	3.91205e-53	0.359456	0.275	0.073	5.45653e-49	11	Neos
aurB1	9.11826e-53	0.416599	0.308	0.088	1.27181e-48	11	aurB
Arl6IP11	1.19412e-51	0.424915	0.313	0.093	1.66556e-47	11	Arl6IP1
Ts	1.24535e-50	0.385581	0.305	0.09	1.73701e-46	11	Ts
mei-P261	7.50406e-50	0.469459	0.457	0.183	1.04667e-45	11	mei-P26
CG7154	1.82132e-49	0.49701	0.471	0.199	2.54038e-45	11	CG7154
Pcd1	1.09797e-48	0.47008	0.377	0.137	1.53144e-44	11	Pcd
CG10336	2.18118e-48	0.361515	0.3	0.089	3.04231e-44	11	CG10336
hrg	7.97945e-48	0.39344	0.33	0.107	1.11297e-43	11	hrg
CG14647	1.14373e-47	0.366951	0.285	0.083	1.59528e-43	11	CG14647
dgt21	9.52067e-47	0.437519	0.377	0.134	1.32794e-42	11	dgt2
His3.3B1	1.26747e-44	0.495518	0.767	0.542	1.76786e-40	11	His3.3B
geminin1	3.66177e-44	0.441844	0.479	0.209	5.10744e-40	11	geminin
Rbfox1	1.94587e-42	0.449501	0.318	0.108	2.71409e-38	11	Rbfox1
Argk2	3.00452e-42	0.408353	0.744	0.43	4.1907e-38	11	Argk
Rcd-1	5.69642e-42	0.601862	0.519	0.266	7.94537e-38	11	Rcd-1
endos2	6.76482e-42	0.548924	0.685	0.441	9.43557e-38	11	endos
Ref1	9.87133e-42	0.526086	0.767	0.539	1.37685e-37	11	Ref1
kuk2	3.22952e-41	0.394358	0.375	0.14	4.50453e-37	11	kuk
pch21	3.31709e-41	0.356995	0.362	0.131	4.62668e-37	11	pch2
wmd	5.36767e-41	0.431182	0.454	0.203	7.48682e-37	11	wmd
CycB1	7.80244e-41	0.264105	0.342	0.12	1.08828e-36	11	CycB
Ssrp	3.37104e-40	0.39717	0.464	0.207	4.70193e-36	11	Ssrp
Lam1	3.6362e-40	0.471177	0.529	0.264	5.07177e-36	11	Lam
Mis12	4.55589e-40	0.342605	0.258	0.078	6.35456e-36	11	Mis12
Nap11	5.92505e-40	0.364472	0.99	0.979	8.26425e-36	11	Nap1
Src64B1	1.58073e-39	0.332902	0.313	0.108	2.2048e-35	11	Src64B
CG316731	5.46405e-38	0.353626	0.3	0.106	7.62126e-34	11	CG31673
ftz-f13	7.58193e-38	0.433573	0.655	0.382	1.05753e-33	11	ftz-f1
Mcm3	1.45071e-37	0.391576	0.347	0.135	2.02345e-33	11	Mcm3
CG158911	2.78761e-37	0.414091	0.407	0.176	3.88816e-33	11	CG15891
CG6693	4.02048e-37	0.35348	0.318	0.115	5.60777e-33	11	CG6693
gpp	9.46277e-37	0.417964	0.484	0.231	1.31987e-32	11	gpp
Bin1	1.02473e-36	0.442192	0.479	0.238	1.42929e-32	11	Bin1
CG11596	2.51168e-36	0.31268	0.261	0.085	3.50329e-32	11	CG11596
RhoGEF4	3.36147e-36	0.332053	0.258	0.083	4.68858e-32	11	RhoGEF4
CG6340	4.42656e-36	0.348031	0.308	0.112	6.17417e-32	11	CG6340
Cks85A	5.42193e-36	0.437188	0.402	0.18	7.56251e-32	11	Cks85A
CG4502	9.38051e-36	0.414221	0.409	0.184	1.30839e-31	11	CG4502
Rab35	1.4316e-35	0.421134	0.481	0.234	1.9968e-31	11	Rab35
mRpL16	2.91701e-35	0.466246	0.588	0.349	4.06865e-31	11	mRpL16
mts	3.64136e-35	0.412861	0.893	0.796	5.07897e-31	11	mts
Naa40	4.17099e-35	0.371408	0.325	0.125	5.8177e-31	11	Naa40
CG4004	7.32978e-35	0.32145	0.33	0.127	1.02236e-30	11	CG4004
smt3	8.67692e-35	0.287379	0.995	0.99	1.21026e-30	11	smt3
Cdk11	1.82497e-34	0.397716	0.372	0.155	2.54547e-30	11	Cdk1
CG11417	2.04439e-34	0.40705	0.494	0.251	2.85151e-30	11	CG11417
baf1	2.29956e-34	0.542417	0.653	0.437	3.20743e-30	11	baf
MED20	3.05896e-34	0.322497	0.258	0.086	4.26664e-30	11	MED20
betaTub56D2	5.10443e-34	0.350806	0.978	0.957	7.11965e-30	11	betaTub56D
CG4951	7.61817e-34	0.311084	0.275	0.096	1.06258e-29	11	CG4951
CycA1	7.67681e-34	0.303264	0.251	0.081	1.07076e-29	11	CycA
Ote	8.64701e-34	0.289841	0.251	0.081	1.20609e-29	11	Ote
Nup35	3.01815e-33	0.369675	0.362	0.154	4.20971e-29	11	Nup35
14-3-3epsilon1	6.84711e-33	0.413669	0.968	0.948	9.55034e-29	11	14-3-3epsilon
His3.3A	1.09068e-32	0.385213	0.896	0.774	1.52128e-28	11	His3.3A
Slbp	2.16324e-32	0.344553	0.385	0.169	3.01729e-28	11	Slbp
eIF4E11	2.31462e-32	0.400589	0.876	0.713	3.22844e-28	11	eIF4E1
Set1	2.97026e-32	0.40902	0.734	0.511	4.14292e-28	11	Set
Rala	5.16431e-32	0.369815	0.34	0.143	7.20319e-28	11	Rala
Psc	6.08946e-32	0.349375	0.367	0.16	8.49358e-28	11	Psc
grp1	1.00727e-31	0.266271	0.266	0.092	1.40495e-27	11	grp
CG17333	1.32472e-31	0.368341	0.365	0.161	1.84771e-27	11	CG17333
CG15309	2.5023e-31	0.332029	0.325	0.128	3.49021e-27	11	CG15309
Rrp11	3.15805e-31	0.268601	0.268	0.094	4.40485e-27	11	Rrp1
Chrac-16	5.56388e-31	0.299518	0.293	0.112	7.7605e-27	11	Chrac-16
TfIIFalpha	1.858e-30	0.385876	0.588	0.358	2.59154e-26	11	TfIIFalpha
snf	1.9263e-30	0.474139	0.558	0.341	2.6868e-26	11	snf
CG4686	2.17902e-30	0.391904	0.429	0.216	3.03929e-26	11	CG4686
CG11590	4.29479e-30	0.405689	0.501	0.27	5.99037e-26	11	CG11590
Dsp1	5.19397e-30	0.344312	0.365	0.163	7.24455e-26	11	Dsp1
CG70541	6.72809e-30	0.266195	0.273	0.101	9.38434e-26	11	CG7054
PCNA1	7.26955e-30	0.479222	0.576	0.349	1.01396e-25	11	PCNA
SmD1	1.16945e-29	0.438137	0.717	0.509	1.63115e-25	11	SmD1
Zfrp8	1.31736e-29	0.283864	0.315	0.128	1.83745e-25	11	Zfrp8
CG9992	1.73845e-29	0.330006	0.31	0.128	2.42478e-25	11	CG9992
CG447741	1.80852e-29	0.489219	0.491	0.28	2.52252e-25	11	CG44774
TfIIS	1.82202e-29	0.37754	0.462	0.239	2.54136e-25	11	TfIIS
CG5380	2.39945e-29	0.271465	0.266	0.098	3.34675e-25	11	CG5380
Pits1	2.76179e-29	0.386575	0.65	0.413	3.85214e-25	11	Pits
Rcc11	3.71535e-29	0.399834	0.464	0.251	5.18217e-25	11	Rcc1
trsn	3.76654e-29	0.40864	0.417	0.211	5.25356e-25	11	trsn
Mlf	4.10775e-29	0.37585	0.387	0.183	5.72949e-25	11	Mlf
Det	4.67095e-29	0.285686	0.258	0.093	6.51504e-25	11	Det
Cdk7	1.67122e-28	0.269636	0.258	0.095	2.33102e-24	11	Cdk7
RanGAP	1.72077e-28	0.304241	0.308	0.127	2.40014e-24	11	RanGAP
SNRPG	1.75471e-28	0.395841	0.829	0.687	2.44747e-24	11	SNRPG
Gart	2.03147e-28	0.409919	0.362	0.171	2.8335e-24	11	Gart
Uba21	2.19004e-28	0.451252	0.568	0.358	3.05467e-24	11	Uba2
Jafrac12	2.67739e-28	0.311587	0.968	0.919	3.73442e-24	11	Jafrac1
CG3226	2.75672e-28	0.383552	0.767	0.573	3.84507e-24	11	CG3226
stai5	2.86594e-28	0.394481	0.663	0.407	3.99742e-24	11	stai
REG	2.93487e-28	0.348613	0.821	0.663	4.09355e-24	11	REG
RfC3	3.28421e-28	0.306009	0.323	0.137	4.58081e-24	11	RfC3
crol2	7.69922e-28	0.390627	0.692	0.482	1.07389e-23	11	crol
dre41	1.39514e-27	0.319841	0.355	0.16	1.94594e-23	11	dre4
DCP1	2.06495e-27	0.324974	0.273	0.109	2.88019e-23	11	DCP1
A16	2.0742e-27	0.33801	0.38	0.181	2.89309e-23	11	A16
Coq7	2.11333e-27	0.366784	0.462	0.248	2.94767e-23	11	Coq7
RfC38	2.87093e-27	0.307267	0.298	0.123	4.00438e-23	11	RfC38
CG13901	3.05935e-27	0.319772	0.357	0.164	4.26717e-23	11	CG13901
InR1	4.21988e-27	0.362546	0.397	0.197	5.88588e-23	11	InR
l(3)026401	1.21393e-26	0.35102	0.377	0.185	1.69319e-22	11	l(3)02640
Su(var)2051	1.89883e-26	0.378832	0.797	0.642	2.64848e-22	11	Su(var)205
Phs	2.70821e-26	0.29941	0.256	0.1	3.77741e-22	11	Phs
His2Av2	3.48675e-26	0.333674	0.891	0.767	4.86332e-22	11	His2Av
Tao1	3.50693e-26	0.280056	0.283	0.115	4.89147e-22	11	Tao
RpII18	3.77875e-26	0.387106	0.757	0.583	5.2706e-22	11	RpII18
CSN6	4.23182e-26	0.310773	0.38	0.184	5.90254e-22	11	CSN6
Ran	9.20567e-26	0.297864	0.95	0.882	1.28401e-21	11	Ran
CG4789	1.06663e-25	0.424361	0.578	0.385	1.48774e-21	11	CG4789
SmD2	1.44903e-25	0.352029	0.797	0.617	2.02111e-21	11	SmD2
CG1910	3.59501e-25	0.383904	0.598	0.392	5.01432e-21	11	CG1910
cg1	8.20805e-25	0.317246	0.337	0.157	1.14486e-20	11	cg
Pa1	1.11043e-24	0.321248	0.283	0.121	1.54883e-20	11	Pa1
CG13994	1.36011e-24	0.306832	0.283	0.121	1.89709e-20	11	CG13994
Mad	1.46908e-24	0.275427	0.266	0.108	2.04907e-20	11	Mad
lawc	1.893e-24	0.395066	0.568	0.354	2.64036e-20	11	lawc
Fen1	2.39988e-24	0.277059	0.251	0.099	3.34735e-20	11	Fen1
arm	2.94586e-24	0.361969	0.439	0.241	4.10888e-20	11	arm
CG1888	5.00032e-24	0.344079	0.377	0.194	6.97444e-20	11	CG1888
Pep	5.26e-24	0.363818	0.772	0.6	7.33665e-20	11	Pep
Non3	5.7138e-24	0.349177	0.643	0.441	7.96961e-20	11	Non3
CG4968	7.01333e-24	0.337923	0.516	0.311	9.78219e-20	11	CG4968
Myd88	7.48406e-24	0.292401	0.298	0.132	1.04388e-19	11	Myd88
Rpb7	4.88569e-23	0.306377	0.365	0.183	6.81457e-19	11	Rpb7
CG8142	5.25223e-23	0.318506	0.298	0.134	7.32581e-19	11	CG8142
CG4045	6.50897e-23	0.332199	0.422	0.233	9.07871e-19	11	CG4045
mRpL48	8.61526e-23	0.350513	0.479	0.286	1.20166e-18	11	mRpL48
Dek	1.08307e-22	0.305409	0.395	0.206	1.51067e-18	11	Dek
MED10	1.21561e-22	0.328455	0.397	0.211	1.69554e-18	11	MED10
Nurf-381	1.33143e-22	0.336815	0.834	0.731	1.85708e-18	11	Nurf-38
RpA-70	1.76848e-22	0.255313	0.253	0.103	2.46667e-18	11	RpA-70
CG7878	1.95743e-22	0.332111	0.382	0.2	2.73022e-18	11	CG7878
rdx1	2.9246e-22	0.297849	0.342	0.166	4.07924e-18	11	rdx
SmB	4.06388e-22	0.30279	0.856	0.769	5.6683e-18	11	SmB
Caf1-180	5.54075e-22	0.306297	0.367	0.187	7.72823e-18	11	Caf1-180
U2af50	7.25065e-22	0.384523	0.63	0.448	1.01132e-17	11	U2af50
trx1	7.79123e-22	0.304028	0.335	0.162	1.08672e-17	11	trx
Ncoa6	9.26453e-22	0.310364	0.36	0.183	1.29222e-17	11	Ncoa6
CG11964	2.37971e-21	0.281189	0.258	0.112	3.31922e-17	11	CG11964
Mapmodulin1	2.82246e-21	0.357377	0.762	0.618	3.93677e-17	11	Mapmodulin
CG14641	3.3836e-21	0.314457	0.315	0.155	4.71945e-17	11	CG14641
rin	3.63683e-21	0.317867	0.779	0.621	5.07265e-17	11	rin
Aos1	5.91548e-21	0.396288	0.494	0.311	8.25091e-17	11	Aos1
Bap60	6.03576e-21	0.332081	0.422	0.239	8.41868e-17	11	Bap60
wap	8.39287e-21	0.31772	0.337	0.173	1.17064e-16	11	wap
CG11699	1.05472e-20	0.342503	0.697	0.545	1.47112e-16	11	CG11699
PyK1	1.10131e-20	0.344587	0.593	0.407	1.53611e-16	11	PyK
atms	1.16967e-20	0.266779	0.333	0.166	1.63146e-16	11	atms
SRPK	1.18629e-20	0.344595	0.546	0.358	1.65463e-16	11	SRPK
Prp31	1.19235e-20	0.266072	0.318	0.154	1.66309e-16	11	Prp31
Rnp4F	1.32419e-20	0.266959	0.268	0.121	1.84698e-16	11	Rnp4F
CG2147	1.51874e-20	0.331152	0.481	0.295	2.11833e-16	11	CG2147
CG31360	3.71147e-20	0.278055	0.298	0.143	5.17676e-16	11	CG31360
CtBP1	3.87334e-20	0.351859	0.752	0.595	5.40253e-16	11	CtBP
Sf3b2	3.95306e-20	0.333893	0.439	0.263	5.51373e-16	11	Sf3b2
mtSSB	8.49029e-20	0.35523	0.603	0.422	1.18423e-15	11	mtSSB
Rga	8.87143e-20	0.309515	0.362	0.197	1.23739e-15	11	Rga
CG3719	1.04185e-19	0.270785	0.251	0.112	1.45318e-15	11	CG3719
jigr11	1.60097e-19	0.25749	0.3	0.142	2.23304e-15	11	jigr1
MBD-like	2.37493e-19	0.328806	0.347	0.189	3.31255e-15	11	MBD-like
CG14220	3.92582e-19	0.287963	0.285	0.139	5.47573e-15	11	CG14220
IPIP	4.09184e-19	0.270465	0.3	0.147	5.70729e-15	11	IPIP
CG4390	6.22099e-19	0.346156	0.548	0.378	8.67704e-15	11	CG4390
CG9643	6.30712e-19	0.264795	0.293	0.143	8.79716e-15	11	CG9643
Dpit47	9.51789e-19	0.279305	0.397	0.224	1.32756e-14	11	Dpit47
CG1542	1.00149e-18	0.312553	0.551	0.375	1.39687e-14	11	CG1542
Fkbp59	1.17994e-18	0.283003	0.839	0.765	1.64578e-14	11	Fkbp59
dod	1.18495e-18	0.391703	0.586	0.425	1.65277e-14	11	dod
NHP21	2.15255e-18	0.280128	0.849	0.71	3.00238e-14	11	NHP2
CG50592	2.1561e-18	0.30163	0.519	0.326	3.00733e-14	11	CG5059
Nxt1	2.26509e-18	0.30511	0.675	0.524	3.15935e-14	11	Nxt1
CG157711	2.3885e-18	0.268553	0.27	0.128	3.33148e-14	11	CG15771
tral1	2.45833e-18	0.310027	0.635	0.462	3.42888e-14	11	tral
U2A	2.73974e-18	0.286257	0.357	0.197	3.82138e-14	11	U2A
stx	3.38624e-18	0.309519	0.295	0.149	4.72312e-14	11	stx
JIL-11	3.65007e-18	0.284936	0.395	0.225	5.09111e-14	11	JIL-1
CG8891	6.32769e-18	0.298955	0.655	0.493	8.82587e-14	11	CG8891
Atu	6.58158e-18	0.285787	0.298	0.149	9.17999e-14	11	Atu
Tango4	7.76501e-18	0.283463	0.355	0.196	1.08306e-13	11	Tango4
Mat1	7.82872e-18	0.256907	0.278	0.137	1.09195e-13	11	Mat1
Pp1-87B	9.53202e-18	0.356192	0.705	0.596	1.32953e-13	11	Pp1-87B
icln	1.12291e-17	0.315014	0.4	0.237	1.56623e-13	11	icln
CG327671	1.76375e-17	0.267199	0.352	0.194	2.46008e-13	11	CG32767
Uch	1.79165e-17	0.33059	0.489	0.322	2.499e-13	11	Uch
CG62871	1.84122e-17	0.463469	0.452	0.304	2.56813e-13	11	CG6287
CSN8	1.9253e-17	0.288133	0.454	0.287	2.68541e-13	11	CSN8
CG12204	2.16239e-17	0.285127	0.328	0.179	3.01611e-13	11	CG12204
Pcmt	2.24773e-17	0.296404	0.392	0.231	3.13513e-13	11	Pcmt
NC2beta	2.38133e-17	0.294798	0.323	0.175	3.32147e-13	11	NC2beta
Nup62	4.05795e-17	0.300038	0.409	0.242	5.66003e-13	11	Nup62
CG57571	4.2853e-17	0.290913	0.34	0.188	5.97714e-13	11	CG5757
crp1	5.09366e-17	0.29883	0.479	0.302	7.10464e-13	11	crp
e(r)	5.25399e-17	0.302046	0.4	0.238	7.32827e-13	11	e(r)
CG4768	5.72692e-17	0.263934	0.35	0.194	7.98791e-13	11	CG4768
mRpL49	5.78658e-17	0.303496	0.695	0.547	8.07112e-13	11	mRpL49
psq	5.84854e-17	0.278261	0.419	0.249	8.15754e-13	11	psq
CG31126	6.88089e-17	0.293577	0.37	0.219	9.59747e-13	11	CG31126
Lk63	7.85929e-17	0.292578	0.801	0.68	1.09621e-12	11	Lk6
CG463851	8.07352e-17	0.337416	0.581	0.423	1.12609e-12	11	CG46385
BicD1	9.8921e-17	0.263144	0.352	0.199	1.37975e-12	11	BicD
asrij	1.01956e-16	0.30015	0.514	0.352	1.42209e-12	11	asrij
BEAF-32	1.2477e-16	0.26024	0.409	0.244	1.74029e-12	11	BEAF-32
mRpS29	1.58711e-16	0.257292	0.34	0.189	2.2137e-12	11	mRpS29
Hel25E	1.81227e-16	0.301963	0.787	0.669	2.52776e-12	11	Hel25E
Mtor	3.26117e-16	0.287925	0.298	0.159	4.54868e-12	11	Mtor
Mcm7	5.95623e-16	0.270418	0.278	0.141	8.30775e-12	11	Mcm7
lid	7.93751e-16	0.299632	0.432	0.278	1.10712e-11	11	lid
shu	1.22228e-15	0.297284	0.36	0.211	1.70483e-11	11	shu
janA	1.40983e-15	0.298994	0.643	0.508	1.96644e-11	11	janA
shep2	1.53476e-15	0.29322	0.496	0.333	2.14068e-11	11	shep
Trf21	2.14238e-15	0.308253	0.404	0.253	2.98819e-11	11	Trf2
CG14434	2.27029e-15	0.260548	0.491	0.326	3.1666e-11	11	CG14434
asf1	3.44081e-15	0.326231	0.427	0.275	4.79924e-11	11	asf1
CG6180	3.45036e-15	0.296056	0.71	0.589	4.81257e-11	11	CG6180
Roc1a	3.62031e-15	0.282126	0.868	0.778	5.04961e-11	11	Roc1a
CG7946	6.75116e-15	0.266514	0.333	0.19	9.41651e-11	11	CG7946
CG2004	8.85468e-15	0.275485	0.38	0.23	1.23505e-10	11	CG2004
CG16985	9.36218e-15	0.261164	0.323	0.182	1.30584e-10	11	CG16985
ctp	1.01703e-14	0.266322	0.849	0.77	1.41856e-10	11	ctp
CG31549	1.31463e-14	0.311838	0.519	0.367	1.83365e-10	11	CG31549
bip2	1.35044e-14	0.313954	0.397	0.253	1.88359e-10	11	bip2
Ubc4	1.89632e-14	0.284155	0.457	0.308	2.64499e-10	11	Ubc4
mRpL14	2.04111e-14	0.285793	0.491	0.339	2.84694e-10	11	mRpL14
lolal1	2.55633e-14	0.299482	0.742	0.641	3.56557e-10	11	lolal
CG34150	2.60962e-14	0.260521	0.293	0.162	3.63989e-10	11	CG34150
Cbp20	2.70553e-14	0.29265	0.449	0.306	3.77367e-10	11	Cbp20
Rpb11	3.60776e-14	0.282792	0.546	0.393	5.0321e-10	11	Rpb11
mahe	4.22363e-14	0.260318	0.283	0.152	5.89112e-10	11	mahe
CG1416	6.0768e-14	0.272144	0.593	0.454	8.47592e-10	11	CG1416
l(2)k09913	6.7113e-14	0.273241	0.467	0.318	9.36092e-10	11	l(2)k09913
CG28652	7.23724e-14	0.2675	0.481	0.324	1.00945e-09	11	CG2865
Taf10	7.83799e-14	0.260716	0.417	0.272	1.09324e-09	11	Taf10
mRpL36	2.70296e-13	0.297063	0.531	0.39	3.77008e-09	11	mRpL36
CG31460	5.35428e-13	0.29086	0.34	0.208	7.46815e-09	11	CG31460
Tfb1	8.06501e-13	0.277532	0.402	0.262	1.12491e-08	11	Tfb1
CG12173	1.01732e-12	0.265527	0.278	0.157	1.41895e-08	11	CG12173
Bx42	1.33225e-12	0.260856	0.377	0.243	1.85822e-08	11	Bx42
CG8778	1.34373e-12	0.277093	0.392	0.264	1.87424e-08	11	CG8778
Mi-2	1.39777e-12	0.273494	0.442	0.301	1.94962e-08	11	Mi-2
Dpy-30L1	1.44013e-12	0.266996	0.337	0.209	2.0087e-08	11	Dpy-30L1
CG14057	1.44622e-12	0.267859	0.375	0.242	2.01718e-08	11	CG14057
mRpS28	3.02577e-12	0.251606	0.697	0.57	4.22034e-08	11	mRpS28
Atg3	3.07618e-12	0.255167	0.337	0.211	4.29065e-08	11	Atg3
ND-24	3.46923e-12	0.27409	0.722	0.614	4.83888e-08	11	ND-24
CG7339	3.67889e-12	0.25343	0.318	0.195	5.13132e-08	11	CG7339
Rrp4	7.01583e-12	0.284124	0.573	0.459	9.78567e-08	11	Rrp4
Vti1b	7.49948e-12	0.261985	0.407	0.272	1.04603e-07	11	Vti1b
Hsc70Cb	9.54673e-12	0.258879	0.501	0.368	1.33158e-07	11	Hsc70Cb
CG10565	1.1457e-11	0.250775	0.553	0.415	1.59803e-07	11	CG10565
CG118991	1.21264e-11	0.301513	0.335	0.211	1.69139e-07	11	CG11899
mRpS14	4.57555e-11	0.262577	0.514	0.391	6.38198e-07	11	mRpS14
rump	5.8951e-11	0.258978	0.434	0.306	8.22248e-07	11	rump
Pp2A-29B	4.06138e-10	0.262673	0.467	0.348	5.66481e-06	11	Pp2A-29B
Srlp	4.31177e-10	0.255998	0.357	0.245	6.01406e-06	11	Srlp
CG11134	1.5898e-09	0.267458	0.491	0.375	2.21746e-05	11	CG11134
SmF	2.03031e-09	0.254273	0.583	0.476	2.83188e-05	11	SmF
CG5676	2.91209e-09	0.2694	0.484	0.371	4.06179e-05	11	CG5676
Aldh3	2.95209e-09	0.279083	0.486	0.38	4.11757e-05	11	Aldh
CG6767	5.10105e-08	0.25905	0.67	0.613	0.000711494	11	CG6767
Mlc2	0	2.17807	0.902	0.186	0	12	Mlc2
up	0	1.82824	0.816	0.113	0	12	up
TpnC73F	0	1.76902	0.767	0.111	0	12	TpnC73F
wupA	0	1.606	0.727	0.082	0	12	wupA
CG5612	0	1.39364	0.649	0.065	0	12	CG5612
Tm2	0	1.38883	0.664	0.067	0	12	Tm2
Mlc1	0	1.242	0.56	0.054	0	12	Mlc1
Mp20	0	1.2059	0.5	0.041	0	12	Mp20
CG5023	0	1.03328	0.549	0.051	0	12	CG5023
l(2)efl	0	1.03199	0.414	0.026	0	12	l(2)efl
Mhc	9.70613e-307	0.755149	0.353	0.021	1.35381e-302	12	Mhc
Zasp66	6.65001e-296	0.944085	0.437	0.035	9.27544e-292	12	Zasp66
CG5597	1.44725e-277	0.826491	0.411	0.033	2.01862e-273	12	CG5597
Act57B	4.71806e-271	1.21002	0.517	0.057	6.58075e-267	12	Act57B
Mf	3.87137e-259	0.961639	0.511	0.057	5.39978e-255	12	Mf
bt	1.97147e-258	0.508564	0.267	0.014	2.74981e-254	12	bt
Neurochondrin	1.17069e-250	0.650099	0.307	0.02	1.63288e-246	12	Neurochondrin
CG5177	1.26947e-237	0.584616	0.299	0.019	1.77066e-233	12	CG5177
CG14687	1.14761e-221	0.663356	0.31	0.023	1.60069e-217	12	CG14687
Mlp60A	1.80677e-219	0.634906	0.296	0.021	2.52008e-215	12	Mlp60A
Prip2	7.72108e-159	1.2534	0.687	0.173	1.07694e-154	12	Prip
mbl	1.14153e-64	0.638478	0.422	0.129	1.59221e-60	12	mbl
Timp1	8.38942e-23	0.460093	0.494	0.287	1.17016e-18	12	Timp
Jafrac13	1.30733e-21	0.356063	0.957	0.919	1.82346e-17	12	Jafrac1
Adk12	3.0243e-10	0.336909	0.307	0.191	4.21829e-06	12	Adk1
Lk64	1.17563e-09	0.301147	0.747	0.681	1.63977e-05	12	Lk6
CG15723	4.89609e-08	0.278433	0.586	0.48	0.000682906	12	CG1572
SPARC3	1.79481e-07	0.252	0.681	0.567	0.0025034	12	SPARC
Mipp1	8.48188e-07	0.263049	0.523	0.433	0.0118305	12	Mipp1
mfas	0	1.53745	0.813	0.033	0	13	mfas
CG13566	0	1.34499	0.561	0.011	0	13	CG13566
CG30154	0	0.955526	0.561	0.018	0	13	CG30154
CG9572	0	0.881568	0.455	0.012	0	13	CG9572
dpn	0	0.519259	0.288	0.006	0	13	dpn
2022-12-01	3.76679e-261	1.0639	0.601	0.048	5.25392e-257	13	2022-12-01
CG2157	9.52463e-252	1.7162	0.258	0.008	1.32849e-247	13	CG2157
Pvf3	4.96261e-227	0.626531	0.338	0.016	6.92185e-223	13	Pvf3
CG6357	4.64875e-216	1.37814	0.848	0.131	6.48408e-212	13	CG6357
CG8854	2.2902e-203	0.581547	0.298	0.014	3.19437e-199	13	CG8854
wb	8.58444e-197	0.822016	0.5	0.044	1.19736e-192	13	wb
vir-1	1.08321e-187	1.1695	0.475	0.042	1.51086e-183	13	vir-1
NLaz1	2.78863e-155	0.947801	0.535	0.062	3.88959e-151	13	NLaz
Fas33	5.42047e-131	1.52893	0.985	0.386	7.56047e-127	13	Fas3
rpr	1.11438e-128	0.812128	0.47	0.059	1.55433e-124	13	rpr
CG45263	1.54322e-113	0.670107	0.399	0.047	2.15248e-109	13	CG45263
CG4199	2.28537e-105	0.617739	0.404	0.051	3.18763e-101	13	CG4199
stl2	1.19365e-104	1.35805	0.96	0.403	1.6649e-100	13	stl
CG8369	1.79367e-103	0.496669	0.328	0.034	2.50181e-99	13	CG8369
Jupiter2	1.40583e-91	1.17605	1	0.791	1.96086e-87	13	Jupiter
CG105273	1.29177e-81	1.17772	0.924	0.434	1.80176e-77	13	CG10527
RhoL1	5.16928e-80	0.713577	0.485	0.093	7.21011e-76	13	RhoL
CG31324	1.71202e-76	0.891639	0.621	0.167	2.38792e-72	13	CG31324
CG463392	1.65117e-75	0.79358	0.52	0.114	2.30305e-71	13	CG46339
fz	3.71003e-69	0.360975	0.258	0.031	5.17475e-65	13	fz
Fas22	5.99251e-66	0.90041	0.904	0.435	8.35836e-62	13	Fas2
CG7702	6.3367e-62	0.524513	0.404	0.079	8.83844e-58	13	CG7702
tsl	2.61244e-55	0.511308	0.263	0.039	3.64383e-51	13	tsl
mamo2	3.48333e-51	0.909236	0.848	0.473	4.85855e-47	13	mamo
CG153651	1.02791e-48	0.519491	0.429	0.108	1.43373e-44	13	CG15365
CG9747	2.78391e-48	0.70652	0.646	0.252	3.883e-44	13	CG9747
stai6	2.88995e-48	0.739548	0.843	0.408	4.0309e-44	13	stai
SPARC4	8.50793e-48	0.851163	0.934	0.565	1.18669e-43	13	SPARC
Traf4	1.3623e-47	0.444262	0.359	0.079	1.90014e-43	13	Traf4
CG31705	3.54811e-47	0.43845	0.338	0.071	4.94891e-43	13	CG31705
Lac	3.75067e-47	0.431408	0.348	0.076	5.23143e-43	13	Lac
AnxB111	2.80035e-46	0.722744	0.697	0.293	3.90593e-42	13	AnxB11
E(spl)m7-HLH1	4.52223e-45	0.835544	0.444	0.124	6.30761e-41	13	E(spl)m7-HLH
babos3	2.09033e-44	0.720217	0.919	0.662	2.9156e-40	13	babos
shg1	1.04063e-42	0.733726	0.753	0.363	1.45148e-38	13	shg
CG150983	2.78212e-42	0.7046	0.97	0.744	3.8805e-38	13	CG15098
CG42327	1.08551e-41	0.343337	0.258	0.048	1.51408e-37	13	CG42327
Ptpmeg2	1.332e-41	0.478404	0.46	0.134	1.85787e-37	13	Ptpmeg2
CG5390	1.87035e-41	0.430037	0.348	0.081	2.60877e-37	13	CG5390
Wdr621	3.45595e-41	0.690068	0.631	0.261	4.82036e-37	13	Wdr62
CG9967	3.46484e-40	0.432698	0.359	0.089	4.83276e-36	13	CG9967
Arc1	6.89371e-40	1.05046	0.434	0.133	9.61535e-36	13	Arc1
ct2	1.10612e-37	0.534269	0.616	0.23	1.54282e-33	13	ct
GILT11	3.40134e-37	0.627179	0.939	0.693	4.74419e-33	13	GILT1
CG8399	4.55872e-37	0.435849	0.323	0.079	6.35851e-33	13	CG8399
CG427972	1.80834e-35	0.545358	0.566	0.215	2.52227e-31	13	CG42797
betaTub60D1	5.9226e-35	0.572613	0.702	0.342	8.26085e-31	13	betaTub60D
cib2	5.7584e-34	0.492157	0.965	0.751	8.03182e-30	13	cib
AnxB92	6.33067e-34	0.464043	0.566	0.213	8.83001e-30	13	AnxB9
ps3	5.74696e-33	0.582003	0.864	0.555	8.01586e-29	13	ps
fax3	1.86495e-31	0.553208	0.818	0.45	2.60124e-27	13	fax
cdi	2.15693e-29	0.371464	0.348	0.103	3.00849e-25	13	cdi
Spn27A	4.2602e-29	0.34074	0.318	0.089	5.94213e-25	13	Spn27A
pck1	1.04132e-28	0.357827	0.374	0.116	1.45243e-24	13	pck
ftz-f14	1.26503e-28	0.523364	0.727	0.385	1.76446e-24	13	ftz-f1
CG12730	1.52917e-28	0.33706	0.308	0.086	2.13288e-24	13	CG12730
CG42674	3.0083e-27	0.451514	0.409	0.145	4.19598e-23	13	CG42674
Cys2	3.82961e-27	0.342521	0.404	0.134	5.34154e-23	13	Cys
CG139171	4.23248e-27	0.56542	0.682	0.372	5.90346e-23	13	CG13917
lolal2	3.29378e-26	0.510746	0.874	0.64	4.59416e-22	13	lolal
E(spl)m2-BFM2	1.37589e-25	0.533234	0.369	0.127	1.91909e-21	13	E(spl)m2-BFM
Df312	1.40874e-25	0.41384	0.99	0.952	1.96492e-21	13	Df31
CG339391	1.93762e-25	0.298751	0.268	0.07	2.7026e-21	13	CG33939
Rbp1-like	1.96103e-25	0.368162	0.343	0.113	2.73524e-21	13	Rbp1-like
chic1	5.83018e-25	0.370045	0.995	0.961	8.13193e-21	13	chic
CG142074	1.99975e-24	0.506654	0.576	0.272	2.78925e-20	13	CG14207
DAAM	2.56299e-23	0.371114	0.429	0.166	3.57485e-19	13	DAAM
dally1	3.11362e-23	0.445261	0.566	0.272	4.34288e-19	13	dally
Jafrac14	3.75905e-23	0.373737	0.99	0.919	5.24312e-19	13	Jafrac1
CG153091	4.70117e-23	0.378138	0.369	0.13	6.5572e-19	13	CG15309
Xrp12	5.4251e-23	0.502406	0.773	0.512	7.56693e-19	13	Xrp1
Nuak11	7.12728e-23	0.404955	0.556	0.263	9.94114e-19	13	Nuak1
mgl	8.96591e-23	0.514076	0.571	0.29	1.25057e-18	13	mgl
cpo	1.29975e-22	0.363409	0.354	0.127	1.81289e-18	13	cpo
nmo	1.64118e-22	0.426146	0.338	0.12	2.28912e-18	13	nmo
chrb1	2.03272e-22	0.510213	0.545	0.267	2.83523e-18	13	chrb
cindr2	2.82433e-22	0.560022	0.687	0.4	3.93938e-18	13	cindr
Frl4	5.24689e-22	0.460796	0.732	0.433	7.31836e-18	13	Frl
GstE1	7.1999e-22	0.476432	0.515	0.24	1.00424e-17	13	GstE1
Lmpt	9.15993e-22	0.360038	0.424	0.173	1.27763e-17	13	Lmpt
CG31729	1.31723e-21	0.320889	0.333	0.115	1.83728e-17	13	CG31729
CG171242	1.41966e-21	0.512851	0.667	0.387	1.98014e-17	13	CG17124
zip3	2.97121e-21	0.472888	0.838	0.652	4.14425e-17	13	zip
CG14834	4.56994e-21	0.646288	0.364	0.144	6.37415e-17	13	CG14834
how	7.3264e-21	0.305187	0.328	0.115	1.02189e-16	13	how
Moe1	7.73024e-21	0.393183	0.96	0.817	1.07821e-16	13	Moe
klar1	1.10871e-20	0.431738	0.773	0.519	1.54643e-16	13	klar
viaf	1.26766e-20	0.53938	0.677	0.446	1.76813e-16	13	viaf
aqz3	1.36238e-20	0.38003	0.975	0.922	1.90024e-16	13	aqz
dome	1.55076e-20	0.340046	0.374	0.144	2.163e-16	13	dome
CG5554	2.44158e-20	0.454293	0.621	0.347	3.40552e-16	13	CG5554
Clic1	2.47723e-20	0.452508	0.596	0.324	3.45524e-16	13	Clic
jim1	2.78049e-20	0.408283	0.51	0.243	3.87823e-16	13	jim
CG62872	4.77309e-20	0.398316	0.591	0.304	6.6575e-16	13	CG6287
CG2691	8.11584e-20	0.35084	0.288	0.098	1.132e-15	13	CG2691
Reg-5	1.41383e-19	0.452695	0.414	0.187	1.972e-15	13	Reg-5
spen3	1.61208e-19	0.42324	0.798	0.522	2.24853e-15	13	spen
mrj	2.23222e-19	0.372266	0.379	0.154	3.1135e-15	13	mrj
trol2	5.64617e-19	0.424749	0.909	0.757	7.87528e-15	13	trol
Pka-R22	6.05006e-19	0.406176	0.455	0.207	8.43862e-15	13	Pka-R2
CG3655	6.36077e-19	0.289142	0.273	0.091	8.872e-15	13	CG3655
CHMP2B	8.55416e-19	0.37715	0.394	0.166	1.19313e-14	13	CHMP2B
bbg	9.1702e-19	0.364043	0.374	0.153	1.27906e-14	13	bbg
blow1	1.02798e-18	0.336413	0.303	0.111	1.43382e-14	13	blow
ena	2.67535e-18	0.36695	0.48	0.232	3.73158e-14	13	ena
cno	1.49335e-17	0.274907	0.328	0.124	2.08293e-13	13	cno
Act5C3	1.96595e-17	0.256678	1	0.997	2.74211e-13	13	Act5C
CG318082	2.17956e-17	0.334974	0.424	0.185	3.04005e-13	13	CG31808
Prosap1	2.97042e-17	0.472994	0.823	0.611	4.14314e-13	13	Prosap
Chmp12	4.6934e-17	0.387806	0.823	0.604	6.54635e-13	13	Chmp1
mtgo1	6.4087e-17	0.381741	0.47	0.226	8.93885e-13	13	mtgo
Chd643	1.00101e-16	0.359891	0.944	0.825	1.3962e-12	13	Chd64
CG99322	1.71973e-16	0.318908	0.369	0.157	2.39868e-12	13	CG9932
Psc1	3.25716e-16	0.302258	0.379	0.162	4.54309e-12	13	Psc
wdb	4.57711e-16	0.353624	0.475	0.238	6.38415e-12	13	wdb
Mob21	7.00987e-16	0.356816	0.384	0.172	9.77736e-12	13	Mob2
betaTub56D3	8.89606e-16	0.3563	0.98	0.957	1.24082e-11	13	betaTub56D
Arpc3A2	9.33052e-16	0.394607	0.662	0.415	1.30142e-11	13	Arpc3A
CG32066	1.14193e-15	0.300558	0.348	0.147	1.59277e-11	13	CG32066
Nrg1	1.19435e-15	0.305134	0.338	0.141	1.66588e-11	13	Nrg
CG44042	1.39662e-15	0.344894	0.354	0.153	1.94801e-11	13	CG4404
tsr1	1.63809e-15	0.271866	1	0.996	2.2848e-11	13	tsr
insc	1.74173e-15	0.306449	0.293	0.115	2.42937e-11	13	insc
crol3	2.7661e-15	0.340378	0.722	0.485	3.85815e-11	13	crol
drongo1	3.35181e-15	0.422342	0.682	0.458	4.6751e-11	13	drongo
kek11	3.38199e-15	0.33626	0.828	0.625	4.7172e-11	13	kek1
Ect4	4.40881e-15	0.276152	0.303	0.12	6.14941e-11	13	Ect4
aru1	6.11726e-15	0.308834	0.313	0.13	8.53236e-11	13	aru
Cyp6v11	8.0382e-15	0.33693	0.424	0.209	1.12117e-10	13	Cyp6v1
hdc3	8.04469e-15	0.416984	0.54	0.312	1.12207e-10	13	hdc
Tre12	8.27328e-15	0.357279	0.485	0.252	1.15396e-10	13	Tre1
bou	8.79368e-15	0.390856	0.697	0.47	1.22654e-10	13	bou
kune1	9.8291e-15	0.26828	0.318	0.132	1.37096e-10	13	kune
tacc	1.04205e-14	0.335051	0.429	0.215	1.45345e-10	13	tacc
Rsf1	1.85071e-14	0.327539	0.586	0.343	2.58137e-10	13	Rsf1
Trf22	2.28803e-14	0.401445	0.465	0.254	3.19134e-10	13	Trf2
phm1	2.46578e-14	0.31184	0.293	0.121	3.43927e-10	13	phm
sd	3.50466e-14	0.296405	0.49	0.263	4.88831e-10	13	sd
CG327672	4.11371e-14	0.302198	0.404	0.195	5.73781e-10	13	CG32767
rgn2	5.44934e-14	0.398571	0.566	0.343	7.60074e-10	13	rgn
Cirl1	5.77175e-14	0.295664	0.348	0.157	8.05044e-10	13	Cirl
Rac22	5.92182e-14	0.321947	0.576	0.335	8.25976e-10	13	Rac2
CG13252	9.59693e-14	0.326604	0.318	0.14	1.33858e-09	13	CG13252
sdt	1.16206e-13	0.267278	0.313	0.135	1.62084e-09	13	sdt
Mlc-c2	1.94515e-13	0.390929	0.727	0.512	2.71309e-09	13	Mlc-c
kuz1	3.61825e-13	0.338691	0.54	0.311	5.04673e-09	13	kuz
CG10283	3.94656e-13	0.250023	0.404	0.194	5.50467e-09	13	CG10283
tna	5.33554e-13	0.277134	0.323	0.144	7.44201e-09	13	tna
CG7523	5.58076e-13	0.283485	0.389	0.189	7.78404e-09	13	CG7523
Diap13	6.91363e-13	0.335566	0.52	0.299	9.64314e-09	13	Diap1
Cyp305a1	7.46018e-13	0.354836	0.298	0.132	1.04055e-08	13	Cyp305a1
Imp2	8.13616e-13	0.349068	0.823	0.675	1.13483e-08	13	Imp
Dlc90F	8.61087e-13	0.367408	0.687	0.479	1.20104e-08	13	Dlc90F
crb	9.6262e-13	0.326724	0.495	0.28	1.34266e-08	13	crb
CG2310	2.22661e-12	0.314889	0.48	0.273	3.10567e-08	13	CG2310
mbl1	3.61094e-12	0.278929	0.303	0.134	5.03654e-08	13	mbl
2022-09-21	7.37397e-12	0.338625	0.702	0.484	1.02852e-07	13	2022-09-02
shep3	7.4756e-12	0.322752	0.545	0.334	1.0427e-07	13	shep
Hsp67Ba	7.4919e-12	0.268243	0.278	0.12	1.04497e-07	13	Hsp67Ba
Arc2	7.65697e-12	0.420812	0.348	0.179	1.06799e-07	13	Arc2
Trxr-1	8.1842e-12	0.34022	0.808	0.658	1.14153e-07	13	Trxr-1
arm1	1.56951e-11	0.276158	0.444	0.243	2.18915e-07	13	arm
gish	2.24001e-11	0.293952	0.439	0.246	3.12437e-07	13	gish
l(3)L1231	2.95516e-11	0.311687	0.485	0.291	4.12186e-07	13	l(3)L1231
sqh2	3.56562e-11	0.290741	0.763	0.548	4.97332e-07	13	sqh
CG34383	4.59442e-11	0.326624	0.364	0.197	6.4083e-07	13	CG34383
l(1)G01932	5.23162e-11	0.325223	0.576	0.383	7.29706e-07	13	l(1)G0193
CG83001	5.99233e-11	0.268965	0.343	0.172	8.35811e-07	13	CG8300
Map205	7.60201e-11	0.259162	0.303	0.143	1.06033e-06	13	Map205
shrb2	1.52202e-10	0.293138	0.662	0.466	2.12292e-06	13	shrb
drk	1.58343e-10	0.281841	0.429	0.24	2.20857e-06	13	drk
Khc	2.10429e-10	0.254279	0.399	0.218	2.93507e-06	13	Khc
CG450502	2.12265e-10	0.256778	0.571	0.356	2.96067e-06	13	CG45050
beta-Spec	4.13179e-10	0.269302	0.424	0.24	5.76303e-06	13	beta-Spec
Tollo	4.17665e-10	0.269891	0.333	0.171	5.8256e-06	13	Tollo
Vps28	4.19815e-10	0.288912	0.49	0.304	5.85558e-06	13	Vps28
scyl2	4.89783e-10	0.28479	0.692	0.491	6.83149e-06	13	scyl
CG6398	2.20855e-09	0.33439	0.571	0.396	3.08048e-05	13	CG6398
Arpc4	2.37795e-09	0.261039	0.727	0.563	3.31676e-05	13	Arpc4
CG100982	2.4166e-09	0.296083	0.439	0.267	3.37067e-05	13	CG10098
Aps	2.48404e-09	0.257906	0.611	0.414	3.46474e-05	13	Aps
pasi11	2.5973e-09	0.276989	0.288	0.147	3.62271e-05	13	pasi1
miple22	2.90778e-09	0.309367	0.667	0.495	4.05577e-05	13	miple2
Smr1	3.81911e-09	0.31553	0.591	0.404	5.3269e-05	13	Smr
SkpA1	4.0024e-09	0.26229	0.879	0.766	5.58254e-05	13	SkpA
Syb1	4.10867e-09	0.260544	0.763	0.592	5.73077e-05	13	Syb
CG80342	5.8722e-09	0.262609	0.616	0.426	8.19055e-05	13	CG8034
Eip63E	6.95019e-09	0.2595	0.359	0.194	9.69412e-05	13	Eip63E
CG18901	7.85875e-09	0.312306	0.535	0.364	0.000109614	13	CG1890
capt2	7.86713e-09	0.268297	0.591	0.407	0.000109731	13	capt
CG10939	8.19795e-09	0.325277	0.525	0.364	0.000114345	13	CG10939
Unr1	1.15601e-08	0.307105	0.707	0.552	0.00016124	13	Unr
AnxB10	1.3574e-08	0.27134	0.338	0.187	0.00018933	13	AnxB10
psq1	1.61638e-08	0.266263	0.409	0.251	0.000225453	13	psq
ed	2.03158e-08	0.250764	0.566	0.39	0.000283365	13	ed
Swim1	2.67972e-08	0.290583	0.662	0.504	0.000373767	13	Swim
Zip102B	3.69531e-08	0.262057	0.389	0.239	0.000515422	13	Zip102B
CG150121	4.2522e-08	0.292316	0.712	0.57	0.000593097	13	CG15012
Uch1	5.04694e-08	0.269543	0.485	0.324	0.000703948	13	Uch
Kank2	2.10578e-07	0.25643	0.46	0.298	0.00293714	13	Kank
CG6115	3.41477e-07	0.255867	0.682	0.526	0.00476291	13	CG6115
Ubi-p5E	3.77705e-07	0.250351	0.591	0.431	0.00526823	13	Ubi-p5E
bip21	5.94512e-07	0.255674	0.399	0.255	0.00829225	13	bip2
E(spl)m3-HLH4	2.61263e-06	0.28479	0.783	0.715	0.036441	13	E(spl)m3-HLH
CG132271	4.32615e-06	0.444376	0.313	0.198	0.0603411	13	CG13227
Vml	0	1.95718	0.527	0.019	0	14	Vml
tsl1	0	1.7398	0.822	0.035	0	14	tsl
CG13003	0	0.846252	0.418	0.009	0	14	CG13003
CG17839	1.69126e-194	0.574811	0.315	0.013	2.35897e-190	14	CG17839
psd	5.7569e-189	1.63395	0.719	0.08	8.02973e-185	14	psd
sn	4.53583e-188	1.5104	0.829	0.112	6.32657e-184	14	sn
wb1	1.64469e-124	0.790691	0.466	0.046	2.29401e-120	14	wb
CG31689	1.76086e-107	0.879325	0.459	0.052	2.45605e-103	14	CG31689
CG339392	3.42451e-99	1.16938	0.507	0.069	4.77651e-95	14	CG33939
CG7512	2.19774e-92	0.433771	0.274	0.021	3.0654e-88	14	CG7512
CG63571	3.39506e-82	0.977598	0.658	0.135	4.73543e-78	14	CG6357
2022-12-11	4.6527e-77	0.64764	0.397	0.052	6.48959e-73	14	2022-12-01
GstD33	1.26157e-73	1.51423	0.986	0.757	1.75964e-69	14	GstD3
GstD13	2.82024e-67	1.1244	1	0.988	3.93368e-63	14	GstD1
CG32280	2.8977e-64	0.900575	0.514	0.105	4.04172e-60	14	CG32280
chic2	2.83885e-59	0.818028	1	0.961	3.95963e-55	14	chic
CG113781	3.47186e-59	0.936142	0.555	0.129	4.84255e-55	14	CG11378
mamo3	8.92558e-59	1.29981	0.911	0.473	1.24494e-54	14	mamo
GILT12	1.6168e-45	1.15472	0.959	0.694	2.25512e-41	14	GILT1
Hr4	7.04674e-44	0.605086	0.322	0.057	9.8288e-40	14	Hr4
Act5C4	1.14433e-41	0.566609	1	0.997	1.59611e-37	14	Act5C
Argk3	5.36167e-40	0.930823	0.836	0.434	7.47846e-36	14	Argk
CG31869	9.1812e-39	0.583402	0.308	0.059	1.28059e-34	14	CG31869
CG71942	3.49561e-38	0.69662	0.623	0.212	4.87567e-34	14	CG7194
rgn3	1.63914e-37	0.880589	0.733	0.342	2.28627e-33	14	rgn
CG313241	1.65929e-37	0.795689	0.534	0.17	2.31437e-33	14	CG31324
bnb2	2.84506e-37	0.758146	0.548	0.176	3.96829e-33	14	bnb
kune2	2.71637e-36	0.703517	0.466	0.132	3.7888e-32	14	kune
pck2	1.79888e-35	0.504214	0.438	0.116	2.50908e-31	14	pck
jbug	1.21035e-34	0.392961	0.253	0.044	1.6882e-30	14	jbug
dome1	3.37416e-34	0.60239	0.479	0.144	4.70628e-30	14	dome
RhoGEF64C	7.92408e-34	0.580879	0.308	0.065	1.10525e-29	14	RhoGEF64C
spri	2.2418e-33	0.722957	0.616	0.247	3.12686e-29	14	spri
CG77021	1.26995e-32	0.43039	0.349	0.081	1.77132e-28	14	CG7702
pasi12	3.0776e-32	0.684111	0.466	0.146	4.29264e-28	14	pasi1
Hsp232	4.70392e-32	0.652698	0.993	0.967	6.56103e-28	14	Hsp23
alc1	8.67177e-32	0.756053	0.651	0.273	1.20954e-27	14	alc
CG105274	1.52117e-31	0.77956	0.801	0.437	2.12173e-27	14	CG10527
ImpL21	3.1287e-31	0.727506	0.89	0.501	4.36391e-27	14	ImpL2
Desat1	7.24317e-30	0.672661	0.822	0.484	1.01028e-25	14	Desat1
cib3	6.28574e-29	0.626181	0.945	0.752	8.76735e-25	14	cib
CG122901	2.87414e-28	0.482413	0.39	0.11	4.00885e-24	14	CG12290
udt1	5.98922e-28	0.383613	0.295	0.067	8.35377e-24	14	udt
Lip41	1.38905e-27	0.570317	0.384	0.109	1.93744e-23	14	Lip4
CG101261	2.16056e-27	0.447513	0.349	0.09	3.01355e-23	14	CG10126
CG7860	7.56249e-27	0.35535	0.267	0.058	1.05482e-22	14	CG7860
CG317291	8.45803e-27	0.478189	0.39	0.115	1.17973e-22	14	CG31729
CG44551	9.28179e-25	0.611089	0.5	0.191	1.29462e-20	14	CG4455
Inx2	2.18613e-24	0.566993	0.781	0.491	3.04921e-20	14	Inx2
aop	3.8674e-24	0.575458	0.945	0.734	5.39426e-20	14	aop
crim1	4.77833e-24	0.438088	0.336	0.095	6.66482e-20	14	crim
GstD92	8.09088e-22	0.662974	0.733	0.416	1.12852e-17	14	GstD9
Jupiter3	9.85757e-22	0.51934	0.952	0.792	1.37493e-17	14	Jupiter
Hsp272	1.37824e-21	0.532711	0.979	0.826	1.92237e-17	14	Hsp27
Act42A2	1.39123e-21	0.429579	0.986	0.876	1.94049e-17	14	Act42A
Uvrag1	1.74123e-21	0.598513	0.432	0.159	2.42867e-17	14	Uvrag
Gp1501	2.11922e-21	0.632069	0.801	0.555	2.95589e-17	14	Gp150
apt	8.33522e-21	0.436898	0.418	0.148	1.1626e-16	14	apt
lolal3	1.17993e-20	0.684055	0.836	0.642	1.64576e-16	14	lolal
fax4	1.48753e-20	0.553252	0.767	0.452	2.07481e-16	14	fax
Amph1	1.75265e-20	0.492318	0.452	0.174	2.44459e-16	14	Amph
shg2	2.79019e-20	0.612704	0.664	0.365	3.89176e-16	14	shg
capt3	7.75874e-20	0.601604	0.705	0.407	1.08219e-15	14	capt
cpo1	8.51472e-20	0.414421	0.37	0.127	1.18763e-15	14	cpo
tsr2	4.15572e-19	0.295935	1	0.996	5.7964e-15	14	tsr
Df313	6.35499e-19	0.371215	1	0.952	8.86394e-15	14	Df31
aqz4	8.52766e-19	0.451391	1	0.922	1.18944e-14	14	aqz
GstD10	1.07839e-18	0.405995	0.349	0.117	1.50413e-14	14	GstD10
His4r2	2.05231e-18	0.304016	1	0.999	2.86256e-14	14	His4r
CG171243	2.11395e-18	0.550916	0.671	0.388	2.94853e-14	14	CG17124
Hsp831	2.60249e-18	0.362019	0.993	0.98	3.62996e-14	14	Hsp83
ELOVL	3.62919e-18	0.484894	0.514	0.231	5.062e-14	14	ELOVL
N1	4.92897e-18	0.453166	0.986	0.93	6.87493e-14	14	N
Hsp262	3.91126e-17	0.499603	0.986	0.95	5.45543e-13	14	Hsp26
CtsB12	4.6785e-17	0.435814	0.959	0.846	6.52557e-13	14	CtsB1
mtd	7.28228e-17	0.378763	0.39	0.149	1.01573e-12	14	mtd
Pka-R23	8.81688e-17	0.48028	0.466	0.208	1.22978e-12	14	Pka-R2
Gp93	5.16376e-16	0.533041	0.719	0.486	7.20241e-12	14	Gp93
Mlc-c3	7.49782e-16	0.50928	0.74	0.513	1.0458e-11	14	Mlc-c
RhoL2	1.26462e-15	0.359062	0.288	0.096	1.76389e-11	14	RhoL
shep4	1.40132e-15	0.452111	0.61	0.335	1.95456e-11	14	shep
CG76752	1.76608e-15	0.396788	0.521	0.253	2.46333e-11	14	CG7675
Xrp13	1.81789e-15	0.469683	0.774	0.513	2.53559e-11	14	Xrp1
Atox1	2.58438e-15	0.436093	0.534	0.284	3.6047e-11	14	Atox1
14-3-3epsilon2	4.75376e-15	0.303272	0.993	0.948	6.63054e-11	14	14-3-3epsilon
Jafrac15	7.14512e-15	0.383099	0.945	0.92	9.96602e-11	14	Jafrac1
Sdc1	8.51357e-15	0.474962	0.719	0.471	1.18747e-10	14	Sdc
CG61151	1.38479e-14	0.482606	0.74	0.526	1.9315e-10	14	CG6115
Cln33	2.10342e-14	0.477684	0.493	0.237	2.93385e-10	14	Cln3
CG67702	2.78458e-14	0.384723	1	0.977	3.88394e-10	14	CG6770
Gbeta13F1	3.86823e-14	0.373652	0.89	0.791	5.39541e-10	14	Gbeta13F
Uch2	5.92143e-14	0.40387	0.575	0.324	8.25921e-10	14	Uch
Frl5	6.2043e-14	0.540614	0.692	0.435	8.65376e-10	14	Frl
Btk29A	9.7769e-14	0.438313	0.308	0.12	1.36368e-09	14	Btk29A
bou1	1.09422e-13	0.423813	0.705	0.47	1.52621e-09	14	bou
Eip74EF	1.21784e-13	0.399269	0.301	0.115	1.69865e-09	14	Eip74EF
Fer2LCH2	7.04031e-13	0.291438	0.938	0.813	9.81983e-09	14	Fer2LCH
Calr	9.69037e-13	0.320404	0.986	0.938	1.35161e-08	14	Calr
Skp2	9.97332e-13	0.345534	0.274	0.101	1.39108e-08	14	Skp2
Manf	1.29675e-12	0.354834	0.842	0.642	1.80871e-08	14	Manf
Rsf11	1.4099e-12	0.401624	0.575	0.344	1.96653e-08	14	Rsf1
Mkp31	1.70701e-12	0.394677	0.603	0.358	2.38094e-08	14	Mkp3
Ccm3	2.07153e-12	0.445727	0.5	0.274	2.88937e-08	14	Ccm3
Arc11	6.22454e-12	0.721989	0.315	0.135	8.68199e-08	14	Arc1
Pdi1	6.31074e-12	0.322849	0.966	0.875	8.80222e-08	14	Pdi
crok1	7.20712e-12	0.346527	0.308	0.129	1.00525e-07	14	crok
CG150984	7.36639e-12	0.401185	0.877	0.746	1.02746e-07	14	CG15098
Hmu	1.34284e-11	0.384791	0.534	0.312	1.87299e-07	14	Hmu
ben1	1.81984e-11	0.340383	0.863	0.778	2.53831e-07	14	ben
fend	2.33242e-11	0.322461	0.432	0.214	3.25326e-07	14	fend
26-29-p1	4.03311e-11	0.439195	0.63	0.421	5.62538e-07	14	26-29-p
blow2	5.88208e-11	0.305833	0.274	0.112	8.20433e-07	14	blow
Arf79F	6.18566e-11	0.352465	0.856	0.742	8.62776e-07	14	Arf79F
Imp3	6.65254e-11	0.346151	0.822	0.675	9.27897e-07	14	Imp
mtgo2	8.08072e-11	0.351907	0.445	0.227	1.1271e-06	14	mtgo
peb1	9.88793e-11	0.461723	0.63	0.431	1.37917e-06	14	peb
Clic2	1.05402e-10	0.527422	0.5	0.326	1.47014e-06	14	Clic
CrebA	1.20595e-10	0.408854	0.432	0.239	1.68205e-06	14	CrebA
Cyp305a11	1.31765e-10	0.272211	0.308	0.132	1.83786e-06	14	Cyp305a1
DnaJ-12	1.45942e-10	0.417003	0.801	0.636	2.03561e-06	14	DnaJ-1
stai7	1.94313e-10	0.381327	0.658	0.411	2.71028e-06	14	stai
NK7.11	4.13695e-10	0.333474	0.397	0.202	5.77022e-06	14	NK7.1
sqh3	4.41409e-10	0.401987	0.747	0.549	6.15677e-06	14	sqh
stv2	8.57536e-10	0.323893	0.705	0.499	1.19609e-05	14	stv
KdelR	8.93791e-10	0.305995	0.918	0.771	1.24666e-05	14	KdelR
sdt1	1.31925e-09	0.323181	0.295	0.135	1.84009e-05	14	sdt
CG7011	1.85219e-09	0.338745	0.404	0.217	2.58343e-05	14	CG7011
CG97471	2.26119e-09	0.343801	0.452	0.255	3.15391e-05	14	CG9747
Trxr-11	2.28541e-09	0.325212	0.815	0.659	3.18768e-05	14	Trxr-1
cathD2	2.45066e-09	0.25846	0.945	0.8	3.41818e-05	14	cathD
Hsc70-31	2.68338e-09	0.273342	0.973	0.875	3.74277e-05	14	Hsc70-3
crb1	4.01487e-09	0.365783	0.479	0.281	5.59994e-05	14	crb
PH4alphaEFB	5.31415e-09	0.349424	0.541	0.347	7.41218e-05	14	PH4alphaEFB
l(3)L12311	5.93215e-09	0.433201	0.466	0.292	8.27417e-05	14	l(3)L1231
Spase251	6.24484e-09	0.30353	0.801	0.635	8.7103e-05	14	Spase25
Syb2	6.64808e-09	0.35726	0.747	0.593	9.27274e-05	14	Syb
Gdi1	7.04314e-09	0.341604	0.774	0.623	9.82377e-05	14	Gdi
CG151681	8.65034e-09	0.315638	0.548	0.364	0.000120655	14	CG15168
Inx33	8.65903e-09	0.395537	0.788	0.614	0.000120776	14	Inx3
mgl1	8.99752e-09	0.368191	0.486	0.292	0.000125497	14	mgl
vari	9.62859e-09	0.375191	0.418	0.237	0.0001343	14	vari
Pcyt1	1.05315e-08	0.359908	0.527	0.339	0.000146893	14	Pcyt1
Hsp67Bc1	1.52918e-08	0.339965	0.712	0.52	0.00021329	14	Hsp67Bc
corto	1.76322e-08	0.303018	0.486	0.304	0.000245933	14	corto
CG9302	1.88047e-08	0.298378	0.384	0.205	0.000262288	14	CG9302
miple23	2.34397e-08	0.365584	0.678	0.495	0.000326937	14	miple2
Hsp70Bc2	2.39069e-08	0.485594	0.589	0.4	0.000333454	14	Hsp70Bc
CG100983	4.99785e-08	0.414081	0.432	0.268	0.0006971	14	CG10098
Arpc41	6.11565e-08	0.327658	0.705	0.563	0.000853012	14	Arpc4
CaBP1	7.04657e-08	0.328097	0.699	0.56	0.000982855	14	CaBP1
slgA1	9.19067e-08	0.293322	0.486	0.304	0.00128191	14	slgA
beta-Spec1	1.07665e-07	0.262981	0.411	0.241	0.00150172	14	beta-Spec
Eip75B1	1.16077e-07	0.314063	0.699	0.545	0.00161904	14	Eip75B
CG55541	1.23796e-07	0.329898	0.521	0.349	0.00172671	14	CG5554
eIF4H1	1.30145e-07	0.288328	0.795	0.654	0.00181527	14	eIF4H1
CG139921	1.36931e-07	0.676459	0.411	0.252	0.00190991	14	CG13992
spen4	1.94109e-07	0.315487	0.685	0.524	0.00270743	14	spen
psq2	2.07873e-07	0.301641	0.418	0.252	0.00289941	14	psq
CG13698	2.3811e-07	0.311826	0.397	0.238	0.00332115	14	CG13698
Lamp11	2.78434e-07	0.265308	0.712	0.523	0.0038836	14	Lamp1
Psc2	3.09443e-07	0.416176	0.308	0.163	0.00431611	14	Psc
Men-b1	3.70962e-07	0.290369	0.397	0.235	0.00517418	14	Men-b
Arp3	4.07337e-07	0.290514	0.473	0.308	0.00568153	14	Arp3
cpa	4.64973e-07	0.301466	0.404	0.238	0.00648544	14	cpa
Dlc90F1	5.41092e-07	0.327916	0.61	0.48	0.00754715	14	Dlc90F
CG51122	5.65564e-07	0.306155	0.603	0.446	0.00788848	14	CG5112
Ppa	6.48373e-07	0.258969	0.37	0.211	0.00904351	14	Ppa
Inos2	6.98442e-07	0.292527	0.479	0.318	0.00974187	14	Inos
Hsp682	7.51968e-07	0.450754	0.678	0.524	0.0104885	14	Hsp68
CkIalpha	7.83129e-07	0.29583	0.555	0.398	0.0109231	14	CkIalpha
betaTub60D2	8.74985e-07	0.309558	0.493	0.345	0.0122043	14	betaTub60D
CtBP2	1.15824e-06	0.326383	0.719	0.598	0.0161552	14	CtBP
Ufd1-like	1.22624e-06	0.252745	0.438	0.273	0.0171035	14	Ufd1-like
CG45721	1.30202e-06	0.263896	0.473	0.306	0.0181606	14	CG4572
Arc21	1.43318e-06	0.280645	0.322	0.18	0.01999	14	Arc2
E(spl)mbeta-HLH1	1.6269e-06	0.358949	0.849	0.807	0.022692	14	E(spl)mbeta-HLH
2022-09-22	1.73952e-06	0.314948	0.637	0.486	0.0242629	14	2022-09-02
Ubi-p5E1	1.78967e-06	0.296982	0.61	0.431	0.0249623	14	Ubi-p5E
Spp1	1.8345e-06	0.299896	0.685	0.538	0.0255876	14	Spp
Atx2	1.99562e-06	0.26298	0.473	0.323	0.027835	14	Atx2
Spase22-231	2.8598e-06	0.323343	0.685	0.582	0.0398885	14	Spase22-23
Rala1	3.18468e-06	0.26316	0.281	0.147	0.0444199	14	Rala
chrb2	3.52824e-06	0.296082	0.425	0.269	0.0492118	14	chrb
Ubi-p63E1	3.95423e-06	0.309571	0.61	0.46	0.0551536	14	Ubi-p63E
Arpc3A3	4.32217e-06	0.289634	0.562	0.417	0.0602856	14	Arpc3A
2022-09-11	4.8117e-06	0.279421	0.404	0.258	0.0671136	14	2022-09-01
Inx71	5.13911e-06	0.285294	0.425	0.275	0.0716804	14	Inx7
ergic53	5.56641e-06	0.303504	0.603	0.47	0.0776403	14	ergic53
AP-1sigma	6.3549e-06	0.263245	0.377	0.237	0.0886382	14	AP-1sigma
CG139172	6.58099e-06	0.27446	0.521	0.374	0.0917917	14	CG13917
CG150122	6.59877e-06	0.301079	0.685	0.571	0.0920396	14	CG15012
CG19433	7.23895e-06	0.303296	0.699	0.571	0.100969	14	CG1943
Rpn9	7.63077e-06	0.264013	0.658	0.524	0.106434	14	Rpn9
CG304603	7.64567e-06	0.25388	0.397	0.248	0.106642	14	CG30460
Rap11	8.77824e-06	0.269548	0.89	0.792	0.122439	14	Rap1
ogre1	9.3524e-06	0.25302	0.555	0.397	0.130447	14	ogre
CG56761	1.37549e-05	0.267463	0.514	0.373	0.191853	14	CG5676
Mi-21	1.57315e-05	0.262316	0.445	0.303	0.219423	14	Mi-2
CG32369	1.70682e-05	0.268366	0.466	0.326	0.238067	14	CG32369
Rpt2	1.75239e-05	0.272228	0.562	0.436	0.244423	14	Rpt2
Tollo1	2.12617e-05	0.276104	0.295	0.172	0.296558	14	Tollo
Prosalpha7	2.91545e-05	0.252912	0.842	0.744	0.406647	14	Prosalpha7
Nuak12	2.99159e-05	0.261414	0.397	0.265	0.417268	14	Nuak1
NUCB1	3.67656e-05	0.265541	0.644	0.513	0.512806	14	NUCB1
Rheb1	4.31088e-05	0.273262	0.514	0.386	0.601281	14	Rheb
Socs36E	4.36074e-05	0.252283	0.37	0.239	0.608235	14	Socs36E
CG67071	4.62309e-05	0.272721	0.384	0.258	0.644829	14	CG6707
Khc1	4.76117e-05	0.250186	0.342	0.219	0.664088	14	Khc
zip4	4.96357e-05	0.286073	0.774	0.654	0.692318	14	zip
SH3PX11	7.8775e-05	0.292907	0.342	0.219	1	14	SH3PX1
Acbp1	9.03796e-05	0.303745	0.486	0.373	1	14	Acbp1
pico	9.19442e-05	0.275371	0.582	0.471	1	14	pico
Cnx99A	0.000168869	0.290399	0.637	0.557	1	14	Cnx99A
AnxB112	0.000199197	0.251878	0.411	0.297	1	14	AnxB11
CG23101	0.000331991	0.25724	0.384	0.274	1	14	CG2310
CG42821	0	1.20449	0.312	0.003	0	15	CG42821
CG42822	0	0.685618	0.275	0.002	0	15	CG42822
Dro	1.3128e-221	1.89745	0.275	0.006	1.8311e-217	15	Dro
CG17919	1.4747e-206	0.51731	0.294	0.008	2.05691e-202	15	CG17919
CG301971	5.15549e-156	1.29551	0.67	0.06	7.19087e-152	15	CG30197
CAH2	1.50453e-91	0.881268	0.339	0.025	2.09852e-87	15	CAH2
CG15772	1.31813e-85	1.16667	0.294	0.02	1.83853e-81	15	CG15772
CG13117	5.18688e-85	0.666394	0.275	0.018	7.23467e-81	15	CG13117
CG101262	3.27495e-81	0.913174	0.606	0.089	4.5679e-77	15	CG10126
CG80661	6.12804e-72	0.748741	0.569	0.085	8.54739e-68	15	CG8066
CG78601	6.61419e-69	0.719349	0.45	0.057	9.22547e-65	15	CG7860
Cys3	7.98184e-65	1.03177	0.679	0.134	1.11331e-60	15	Cys
CG301541	3.08169e-63	0.467345	0.275	0.023	4.29833e-59	15	CG30154
CG93361	7.68129e-62	2.15583	0.56	0.105	1.07139e-57	15	CG9336
CG319971	2.12666e-59	1.52877	0.752	0.212	2.96627e-55	15	CG31997
CG15210	6.08991e-49	0.541472	0.266	0.028	8.49421e-45	15	CG15210
Fas34	3.02969e-44	1.14051	0.899	0.39	4.22581e-40	15	Fas3
CG63572	7.57614e-37	0.707034	0.55	0.137	1.05672e-32	15	CG6357
vir-11	4.11223e-35	0.567361	0.294	0.045	5.73574e-31	15	vir-1
CG153473	2.04858e-33	0.868893	0.688	0.225	2.85737e-29	15	CG15347
CG133211	1.50882e-32	0.813321	0.294	0.048	2.10451e-28	15	CG13321
Zip99C1	8.40537e-31	0.743033	0.404	0.094	1.17238e-26	15	Zip99C
cib4	1.56223e-28	0.995199	0.945	0.753	2.17899e-24	15	cib
Lip42	2.44568e-28	0.782996	0.431	0.109	3.41123e-24	15	Lip4
CG150985	4.13597e-28	0.71892	0.963	0.745	5.76885e-24	15	CG15098
Arc12	3.25736e-27	0.995072	0.468	0.135	4.54336e-23	15	Arc1
CG320911	9.76871e-25	0.518323	0.339	0.078	1.36254e-20	15	CG32091
Npc2a1	5.3771e-24	0.842414	0.954	0.851	7.49998e-20	15	Npc2a
Oda1	7.80997e-24	0.560287	1	0.98	1.08933e-19	15	Oda
fax5	5.69839e-23	0.625023	0.872	0.452	7.94811e-19	15	fax
CG94271	6.63685e-22	0.735392	0.367	0.103	9.25708e-18	15	CG9427
crq2	7.73111e-22	0.451031	0.661	0.256	1.07833e-17	15	crq
Fer1HCH2	1.45697e-21	1.11223	0.945	0.817	2.03218e-17	15	Fer1HCH
MtnA1	1.86259e-21	2.11379	0.514	0.211	2.59795e-17	15	MtnA
Fer2LCH3	5.31758e-21	1.00769	0.945	0.813	7.41696e-17	15	Fer2LCH
Hsp233	2.06935e-19	0.902104	1	0.967	2.88633e-15	15	Hsp23
mgl2	7.32838e-19	0.483662	0.661	0.291	1.02216e-14	15	mgl
ifc	1.41232e-18	0.447188	0.404	0.128	1.9699e-14	15	ifc
CG19434	2.18202e-18	0.556138	0.89	0.57	3.04348e-14	15	CG1943
AnxB93	3.30309e-18	0.668979	0.541	0.215	4.60715e-14	15	AnxB9
CG15724	7.72735e-18	0.697735	0.798	0.48	1.07781e-13	15	CG1572
Cam1	9.8887e-18	0.706891	1	0.987	1.37928e-13	15	Cam
pck3	1.1764e-17	0.511179	0.376	0.117	1.64085e-13	15	pck
E(spl)malpha-BFM1	5.50516e-17	1.20532	0.468	0.191	7.6786e-13	15	E(spl)malpha-BFM
CaMKI1	1.69628e-16	0.358899	0.394	0.127	2.36598e-12	15	CaMKI
GstE32	2.02186e-16	0.485609	0.431	0.152	2.82009e-12	15	GstE3
Sap-r2	2.88047e-16	0.485436	0.963	0.762	4.01767e-12	15	Sap-r
cathD3	1.79069e-15	0.601825	0.927	0.801	2.49766e-11	15	cathD
CG70542	1.99637e-15	0.279457	0.339	0.104	2.78454e-11	15	CG7054
sqh4	2.04812e-15	0.633769	0.826	0.549	2.85672e-11	15	sqh
Hsp832	2.62606e-15	0.428898	1	0.98	3.66283e-11	15	Hsp83
Tsp42Ee1	4.35365e-15	0.530333	0.936	0.736	6.07247e-11	15	Tsp42Ee
Ect41	6.156e-15	0.525454	0.358	0.121	8.58639e-11	15	Ect4
Inx34	7.81898e-15	0.665084	0.817	0.614	1.09059e-10	15	Inx3
CG5065	1.3192e-14	0.282131	0.294	0.086	1.84002e-10	15	CG5065
[truncated: 375 more rows]
