# Supplementary material for: Single-cell transcriptomics identifies Keap1-Nrf2 regulated collective invasion in a Drosophila tumor model
Source: eLife. 2022 Nov 2;11:e80956. doi: 10.7554/eLife.80956 (PMC9708074; doi:10.7554/eLife.80956)
Supplement: Figure 1—source data 1. — Related to Figure 1C. [file elife-80956-fig1-data1.xlsx]

## Sheet: Fig2_Intensity_RFP
Figure 1 - Source Data 1
Related to Figure 1C
microns	RFP_IntDen	GFP_IntDen	DAPI_IntDen
0	5.0317	7.8056	10.4563
0.1294	5.0317	7.6032	10.5476
0.2589	5.1032	7.4484	10.5476
0.3883	5.1627	7.5754	10.5516
0.5178	5.0317	7.6468	10.4484
0.6472	5.1071	7.7381	10.2778
0.7766	5.131	7.7024	10.1032
0.9061	5.1151	7.6111	9.9722
1.0355	5.0278	7.4206	9.8452
1.165	5.1548	7.3135	9.8413
1.2944	5.2738	7.3571	9.754
1.4238	5.3849	7.4563	9.6786
1.5533	5.3413	7.5595	9.5675
1.6827	5.4286	7.6429	9.5833
1.8122	5.5675	7.6667	9.5476
1.9416	5.6984	7.6548	9.5079
2.0711	5.8492	7.496	9.4881
2.2005	5.8413	7.5873	9.4643
2.3299	5.9365	7.5278	9.5
2.4594	5.8929	7.4087	9.5635
2.5888	5.7778	7.373	9.5873
2.7183	5.8373	7.1865	9.6151
2.8477	6.0437	7.1151	9.7063
2.9771	6.0516	7.2302	9.8373
3.1066	6.2024	7.377	9.7857
3.236	6.1865	7.5675	9.6865
3.3655	6.2103	7.7302	9.4762
3.4949	6.3452	7.8373	9.4841
3.6243	6.2976	7.7817	9.4524
3.7538	6.3175	7.746	9.3254
3.8832	6.3056	7.7857	9.2659
4.0127	6.2381	7.8452	9.2302
4.1421	6.1905	7.7579	9.1746
4.2715	6.1429	7.7103	9.2262
4.401	6.373	7.7024	9.254
4.5304	6.3214	7.4841	9.4603
4.6599	6.4444	7.3651	9.5714
4.7893	6.377	7.3571	9.8571
4.9187	6.504	7.3452	10.0794
5.0482	6.5833	7.373	10.3175
5.1776	6.627	7.4127	10.6905
5.3071	6.6032	7.5556	11.1111
5.4365	6.6667	7.5833	11.619
5.5659	6.9643	7.6111	12.0913
5.6954	7.0079	7.6111	12.5317
5.8248	7.119	7.746	12.9802
5.9543	7.1389	7.9246	13.3532
6.0837	7.3651	7.9484	13.7341
6.2132	7.4722	8.004	14.0595
6.3426	7.4841	8.0714	14.5556
6.472	7.5992	8.0675	15.2183
6.6015	7.6587	7.9722	16.2381
6.7309	7.5913	7.9762	17.373
6.8604	7.7341	8.0317	18.3532
6.9898	8.131	7.9325	19.0397
7.1192	8.3571	7.8651	19.5159
7.2487	8.6786	7.9087	20.0794
7.3781	8.6389	8.2262	20.9286
7.5076	8.7659	8.4127	21.5317
7.637	9.0238	8.4246	21.5952
7.7664	9.2063	8.496	21.3611
7.8959	9.2976	8.5833	21.4683
8.0253	9.5635	8.8532	21.8294
8.1548	9.8651	9.2103	22.5476
8.2842	10.25	9.631	23.5833
8.4136	10.5794	9.9325	24.7421
8.5431	10.8254	10.0992	25.8056
8.6725	11.1548	10.0675	26.7976
8.802	11.7381	10.0833	27.2183
8.9314	12.0635	10.1508	27.7341
9.0608	12.4246	10.3333	28.5476
9.1903	12.6786	10.5079	30.1548
9.3197	13.3849	10.6786	32.4762
9.4492	13.9206	10.9643	34.754
9.5786	14.5794	11.4087	37.1905
9.7081	15.3532	11.8889	40.0833
9.8375	16	12.1905	42.996
9.9669	16.5119	12.0437	44.6627
10.0964	17.1429	12.1151	45.1865
10.2258	17.7143	12.5952	46.1349
10.3553	18.2579	12.619	48.631
10.4847	18.9405	12.1905	51.5357
10.6141	19.6151	12.1429	54.0595
10.7436	20.3968	12.3373	55.4325
10.873	20.9484	12.5	55.4603
11.0025	21.5516	12.5833	55.2659
11.1319	22.1786	12.8056	56.7262
11.2613	22.373	12.9563	60.0913
11.3908	22.7778	13.0635	64.9048
11.5202	22.8214	13.3056	71.6706
11.6497	22.7778	13.5159	79.1825
11.7791	22.2817	13.5079	83.0397
11.9085	22.5873	13.6984	82.7302
12.038	22.2897	13.9167	80.6944
12.1674	22.2302	14.123	78.1468
12.2969	22.3571	14.131	75.0516
12.4263	22.1944	13.9524	71.2183
12.5557	22.3849	13.4365	66.1508
12.6852	22.7262	13.0556	60.9524
12.8146	23.1349	12.873	56.5556
12.9441	22.877	12.7619	53.5198
13.0735	22.8056	12.6071	51.8016
13.2029	22.5317	12.6944	51.9246
13.3324	22.5437	12.7063	54.5794
13.4618	22.6944	12.8571	60.0595
13.5913	22.5754	12.9484	65.6944
13.7207	22.3056	12.996	68.9167
13.8502	22.2857	12.9802	70.631
13.9796	22.0635	12.9881	72.5794
14.109	21.8413	12.9563	76.0595
14.2385	21.9524	12.7857	78.873
14.3679	21.8413	12.4762	77.9325
14.4974	21.7897	12.25	73.8373
14.6268	21.4167	11.8571	69.623
14.7562	20.7659	11.7222	66.4683
14.8857	20.1071	11.8214	63.4683
15.0151	19.6151	11.7857	61.1746
15.1446	19.4127	11.8135	59.2103
15.274	19.0079	12.1627	56.1151
15.4034	18.5357	12.7421	51.8373
15.5329	18.1905	12.7976	49.4643
15.6623	17.9881	12.7341	48.3214
15.7918	17.869	12.4246	47.7897
15.9212	18.1786	12.3452	47.5357
16.0506	18.2817	12.5357	47.2778
16.1801	18.369	12.9444	46.7143
16.3095	18.2857	13.0397	46.6468
16.439	17.9524	12.7857	47.6349
16.5684	17.9444	12.6468	49.5913
16.6978	18.0913	12.6071	52.246
16.8273	18.0595	12.9841	54.6468
16.9567	18.127	13.2302	55.0516
17.0862	18.0357	13.1786	52.3532
17.2156	18.2897	12.75	47.8175
17.3451	18.0952	12.1984	43.496
17.4745	17.8968	11.9524	39.8095
17.6039	17.2579	11.8849	37.3611
17.7334	17.0198	12.0794	36.1706
17.8628	16.8929	12.004	36.3373
17.9923	16.8135	12.0833	37.6825
18.1217	16.4286	12.1349	39.6825
18.2511	16.1429	12.25	42.2778
18.3806	15.9246	12.4325	44.9325
18.51	15.9365	12.4365	47.0714
18.6395	15.7937	12.2222	48.5913
18.7689	15.619	11.9722	49.7341
18.8983	15.4881	11.877	50.3849
19.0278	15.2103	11.754	50.7063
19.1572	15.4087	11.6786	50.3492
19.2867	15.6349	11.3611	49.869
19.4161	15.873	11.3175	49.9325
19.5455	16.0675	11.4325	50.8175
19.675	15.9365	11.5635	52.6706
19.8044	15.9444	11.6587	54.7897
19.9339	15.6389	11.9246	56.2024
20.0633	15.7063	12.1746	55.8532
20.1927	15.8532	12.2302	55.5595
20.3222	16.0437	12.246	56.4365
20.4516	16.1508	12.3056	58.0238
20.5811	16.127	12.369	58.8373
20.7105	16.4286	12.5794	58.3849
20.84	16.5079	12.877	57.3929
20.9694	16.6825	13.1786	56.9246
21.0988	16.5952	13.3929	57.1151
21.2283	16.7857	13.7143	56.6389
21.3577	16.9683	13.9881	55.5516
21.4872	16.9802	14.119	54.6548
21.6166	17.127	14.4762	53.7897
21.746	17.1429	14.9048	52
21.8755	16.9405	15.0952	49.0317
22.0049	16.8492	15.1429	46.5317
22.1344	16.9484	15.1508	45.2976
22.2638	17.004	14.9841	44.8333
22.3932	17.0675	14.627	44.7579
22.5227	17.0397	14.4127	45.3214
22.6521	17.0357	14.5516	46.9167
22.7816	17.3095	14.869	49.0675
22.911	17.7421	15.0913	50.5556
23.0404	17.6389	15.2063	51.5397
23.1699	17.3016	15.3333	52.1349
23.2993	16.5278	15.381	52.4246
23.4288	16.119	15.2619	52.5635
23.5582	15.5317	14.8413	52.8651
23.6876	15.0079	14.2579	54.5238
23.8171	14.5198	13.7778	57.7024
23.9465	14.131	13.5794	60.7381
24.076	13.996	13.7579	62.6825
24.2054	13.8929	13.8849	64.6111
24.3348	13.7183	14.1667	67.254
24.4643	13.6389	14.1389	69.3452
24.5937	13.5992	14.0198	69.5476
24.7232	13.25	14.0635	68.0714
24.8526	13.1032	14.2897	66.3849
24.9821	13.2341	14.6071	65.6548
25.1115	13.1667	14.504	66.3849
25.2409	13.5476	14.5675	67.7579
25.3704	13.6349	14.5159	69.123
25.4998	13.75	14.5556	70.4762
25.6293	13.9484	14.373	72.5556
25.7587	13.7937	14.4048	75.4286
25.8881	13.7222	14.5556	79.2302
26.0176	13.4405	14.7659	83.5833
26.147	13.4286	14.7183	85.8413
26.2765	13.2619	14.7937	84.2064
26.4059	12.9881	14.6825	80.7936
26.5353	12.9325	14.4643	77.627
26.6648	12.7302	14.2262	75.7143
26.7942	12.7262	14.4325	74.9524
26.9237	12.5238	14.4246	74.75
27.0531	12.4365	14.4683	75.0992
27.1825	12.4484	14.6548	75.6786
27.312	12.2619	14.8175	75.0873
27.4414	12.0992	14.8849	73.6627
27.5709	12.2143	14.75	72.496
27.7003	12.3968	14.7579	72.8452
27.8297	12.25	14.7976	75.2738
27.9592	12.1508	14.8849	81.0556
28.0886	12.2579	14.8611	88.3492
28.2181	12.381	14.9167	94.4444
28.3475	11.9365	14.7262	98.8929
28.477	11.8968	14.623	100.913
28.6064	11.8651	14.8571	99.9921
28.7358	12.0992	14.8294	96.1071
28.8653	12.0635	14.6032	90.4286
28.9947	12.1548	14.8373	82.3056
29.1242	12.377	15.2341	72.6587
29.2536	12.5159	15.2897	63.9167
29.383	12.4444	15.7738	57.0079
29.5125	12.3214	16.6706	53.1151
29.6419	12.5476	17.5357	51.6389
29.7714	12.3056	17.6984	52.9405
29.9008	12.1706	17.2857	56.2262
30.0302	12.0794	16.9246	58.746
30.1597	11.7183	16.8016	60.4603
30.2891	11.5397	17.0159	63.3889
30.4186	11.3651	17.3889	67.4603
30.548	11.2381	17.4524	70.5635
30.6774	11.2698	17.4246	71.123
30.8069	11.5952	17.8016	71.5635
30.9363	11.5119	18.25	73.4564
31.0658	11.4603	18.373	76.0198
31.1952	11.2857	18.0714	77.4921
31.3246	11.3294	17.9683	77.119
31.4541	11.3571	18.0873	74.8175
31.5835	11.2937	18.4603	72.3929
31.713	11.3492	18.8175	71.5913
31.8424	11.0159	19.1151	71.2897
31.9718	10.6587	19.1944	70.6706
32.1013	10.5159	19.1389	70.7698
32.2307	10.3373	19.254	72.2778
32.3602	10.2976	19.7897	75.7857
32.4896	10.2817	20.0635	80.9048
32.6191	10.504	20.6746	85.131
32.7485	10.6627	20.8651	86.9008
32.8779	10.3135	20.6984	86.3413
33.0074	10.25	20.0833	83.7262
33.1368	10.3611	19.9087	79.4564
33.2663	10.504	20.1825	74.1548
33.3957	10.6706	21.0278	70.5436
33.5251	10.8056	21.8175	69.0436
33.6546	10.7381	22.3135	69.2698
33.784	10.5952	22.5754	70.4127
33.9135	10.2976	22.6548	71.8571
34.0429	10	22.873	73.1825
34.1723	9.7619	23.1786	73.5635
34.3018	9.6865	23.2341	74.5317
34.4312	9.631	23.3016	77.5
34.5607	9.373	23.4683	81.4484
34.6901	9.1865	23.6548	85.8929
34.8195	8.9802	23.7143	90.6944
34.949	8.7619	24.0238	94.6667
35.0784	8.5317	23.881	96.8492
35.2079	8.4405	23.1349	96.1468
35.3373	8.4405	22.5556	92.7341
35.4667	8.4286	22.631	90.5992
35.5962	8.1508	22.9683	90.8373
35.7256	8.119	23.123	91.4643
35.8551	8.2817	23.3016	90.6746
35.9845	8.127	23.0635	90.0119
36.114	8.123	23.0913	90.6944
36.2434	8.0079	23.2183	92.3095
36.3728	8.0556	23.131	94.0317
36.5023	8.1508	23.123	94.5595
36.6317	8.3095	23.0516	92.9405
36.7612	8.5952	22.9881	89.6627
36.8906	8.7262	23.0754	86.1746
37.02	8.6468	23.377	82.9048
37.1495	8.4881	24.1905	79.5754
37.2789	8.5556	24.9405	75.377
37.4084	8.6746	25.0397	71.1349
37.5378	8.9008	24.9405	67.1905
37.6672	9.1627	25.6032	63.7579
37.7967	9.3532	26.7302	60.4048
37.9261	9.6786	27.2063	56.9087
38.0556	9.8016	27.3492	53.5278
38.185	9.9325	27.2698	51.8849
38.3144	9.9286	26.9206	52.5873
38.4439	9.7659	26.9127	54.2262
38.5733	9.5675	27.1508	56.6905
38.7028	9.3532	27.0675	60.1349
38.8322	9.1468	27.119	65.0595
38.9616	8.8968	27.3254	70.2064
39.0911	8.7738	27.8452	73.7064
39.2205	8.7778	28.3413	75.7579
39.35	8.9643	28.3571	77.3214
39.4794	9.0595	27.9484	79.3333
39.6088	9.0119	27.6667	81.6151
39.7383	8.9008	27.7381	84.123
39.8677	8.9405	27.8611	87.3016
39.9972	8.9444	27.8135	91.6071
40.1266	8.8214	27.7619	96.2421
40.2561	8.6984	27.7421	99.7778
40.3855	8.6944	27.6508	101.683
40.5149	8.5119	27.2937	102.389
40.6444	8.377	27.0278	101.409
40.7738	8.2976	26.7103	98.1032
40.9033	8.2143	26.6389	93.5635
41.0327	8.2421	27.0079	89.1111
41.1621	8.0675	27.4087	84.6627
41.2916	8.0317	27.746	80.131
41.421	7.9881	27.877	74.627
41.5505	7.9325	28.1032	67.5119
41.6799	8.0556	28.2024	59.4405
41.8093	8.0079	28.2659	52.254
41.9388	7.9762	28.3056	47.3373
42.0682	7.9048	28.1151	44.2857
42.1977	7.6389	27.9524	42.7579
42.3271	7.3373	28	42.1111
42.4565	7.2024	28.0754	41.6468
42.586	7.2222	28.1032	41.3492
42.7154	6.9762	27.9643	41.1984
42.8449	7.0437	27.7024	41.3373
42.9743	7.0317	27.5437	41.7976
43.1037	6.8532	27.627	42.754
43.2332	6.8452	28.0595	44.131
43.3626	6.873	27.9881	45.5794
43.4921	6.8333	27.2341	46.7897
43.6215	6.9286	27.0357	48.1825
43.7509	6.8056	27.6786	50.7817
43.8804	6.5119	28.2817	55.3095
44.0098	6.4206	28.1627	61.0317
44.1393	6.3294	27.3452	66.3333
44.2687	6.0159	26.7063	70.5198
44.3982	5.9484	26.5675	73.873
44.5276	6.0079	26.6508	78.1746
44.657	6.0476	27.2381	83.4444
44.7865	5.9365	27.3095	88.8611
44.9159	5.9286	27.3135	92.9524
45.0454	5.9563	27.3492	94.3095
45.1748	6.0873	27.3492	93.3492
45.3042	6.2897	27.6905	91.1905
45.4337	6.5238	28.3373	89.3492
45.5631	6.6151	29.1032	87.996
45.6926	6.6468	29.6071	87.1984
45.822	6.7937	29.9444	86.2421
45.9514	6.7897	29.7222	85.3452
46.0809	6.9405	29.123	84.4603
46.2103	6.9563	28.7778	83.0238
46.3398	6.9048	28.6944	81.5397
46.4692	6.7659	28.3611	82.7698
46.5986	6.6984	27.8889	87.254
46.7281	6.5913	27.9325	93.2698
46.8575	6.6468	28.2619	98.5635
46.987	6.627	28.6111	100.936
47.1164	6.8413	28.7302	103.309
47.2458	6.9841	28.6944	106.968
47.3753	7.0437	28.2817	110.996
47.5047	6.9325	27.8651	114.484
47.6342	6.9325	28.123	117.441
47.7636	6.9484	28.4206	119.087
47.8931	7.0198	29.0278	118.96
48.0225	6.9365	29.9881	116.321
48.1519	6.7817	31.1508	111.179
48.2814	6.5754	32.6905	104.226
48.4108	6.7659	34.0397	97.5397
48.5403	6.6706	34.4127	91.2619
48.6697	6.7619	34.9921	85.7738
48.7991	6.7897	35.9325	82.9325
48.9286	6.9246	37.4206	84.373
49.058	7.1548	38.0198	87.627
49.1875	6.8929	38.373	90.4722
49.3169	6.6587	38.119	93.4444
49.4463	6.2778	37.4524	95.9643
49.5758	5.9563	36.6944	97.5198
49.7052	5.8929	36.6984	98.4683
49.8347	5.7937	37.8175	99.0476
49.9641	5.7817	38.0079	99.5675
50.0935	5.6944	37.7976	100.726
50.223	5.6944	37.5	103.258
50.3524	5.7063	37.3373	105.139
50.4819	5.8056	37.4444	104.567
50.6113	5.7103	38.1984	104.758
50.7407	5.8294	39.0238	105.147
50.8702	5.6905	39.4405	103.909
50.9996	5.7738	39.2063	101.496
51.1291	5.7897	39.1389	100.504
51.2585	5.7143	39.0873	99.75
51.388	5.7341	39.1786	97.2262
51.5174	5.7183	39.2937	92.373
51.6468	5.8175	39.4921	85.4802
51.7763	5.6667	39.6706	77.2817
51.9057	5.7659	40.2857	70.0119
52.0352	5.7738	40.4325	65.8016
52.1646	5.4405	39.6032	65.4524
52.294	5.4127	38.877	67.3849
52.4235	5.5873	38.631	69.1508
52.5529	5.5	39.2302	70.6627
52.6824	5.3333	40.5357	71.881
52.8118	5.1667	41.246	74.2857
52.9412	5.0833	40.377	77.4444
53.0707	4.9524	38.5952	80.8016
53.2001	4.996	37.7222	83.5873
53.3296	5.0437	37.5516	85.6071
53.459	5.0397	37.6151	86.3611
53.5884	5.0714	37.5833	85.9722
53.7179	5.2421	38.2421	84.5436
53.8473	5.369	39.1627	82.2698
53.9768	5.2857	39.2381	78.6548
54.1062	5.2698	38.1944	73.5079
54.2356	5.2976	37.7698	67.5714
54.3651	5.1111	38.0476	61.3452
54.4945	5.2619	38.6667	55.6667
54.624	5.3889	39.4444	50.8849
54.7534	5.3492	40.1429	46.4484
54.8829	5.3571	39.5238	42.6071
55.0123	5.1429	38.0476	40
55.1417	4.9802	36.8651	37.9206
55.2712	4.8373	36.7976	35.9563
55.4006	4.8968	37.3611	34.0278
55.5301	4.8849	37.7381	31.9206
55.6595	4.869	37.4881	29.9762
55.7889	4.8333	37.4722	28.5516
55.9184	4.7857	38.131	28.7381
56.0478	4.7024	39.0714	30.7817
56.1773	4.5238	39.5119	33.1627
56.3067	4.4683	39.7024	35.6627
56.4361	4.4802	39.9603	38.4365
56.5656	4.4286	39.9484	41.4206
56.695	4.4286	39.75	45.2262
56.8245	4.4563	39.7619	49.8373
56.9539	4.3651	40.4087	54.8889
57.0833	4.5595	41.6786	61.2579
57.2128	4.7183	43.7183	68.9167
57.3422	4.7619	45.9127	75.881
57.4717	4.8889	46.5079	80.4286
57.6011	4.8968	45.496	82.877
57.7305	4.6944	44.3254	84.2897
57.86	4.6984	42.1905	83.2381
57.9894	4.5952	39.8214	78.7262
58.1189	4.5357	38.3135	71.7659
58.2483	4.4722	37.377	63.7659
58.3778	4.3175	36.3016	55.9881
58.5072	4.0952	35.1944	47.2341
58.6366	4.1111	33.4683	37.2262
58.7661	4.0159	30.9087	28.004
58.8955	3.7778	28.4048	21.25
59.025	3.5873	26.4921	16.4563
59.1544	3.373	25.0675	13.0913
59.2838	3.1905	23.6389	10.7381
59.4133	2.9484	21.8651	8.9683
59.5427	2.7778	20.0476	7.5317
59.6722	2.6349	18.1865	6.2579
59.8016	2.5238	16.2817	5.3373
59.931	2.4881	14.5913	4.5595
60.0605	2.4405	13.2222	3.9325
60.1899	2.131	12.2778	3.4722
60.3194	1.7976	11.2143	3.0913
60.4488	1.4365	9.8611	2.7897
60.5782	1.2222	8.381	2.5675
60.7077	1.0119	7.4683	2.2976
60.8371	0.9048	6.6627	2.1627
60.9666	0.8571	6.0675	2.0238
61.096	0.8889	5.4167	1.7857
61.2254	0.8413	4.9643	1.7063
61.3549	0.9048	4.7421	1.6587
61.4843	0.9881	4.2897	1.5079
61.6138	1.1071	4.0238	1.4444
61.7432	1.1706	3.8492	1.4722
61.8726	1.1111	3.7024	1.4246
