# Supplementary material for: Single-cell transcriptomics identifies Keap1-Nrf2 regulated collective invasion in a Drosophila tumor model
Source: eLife. 2022 Nov 2;11:e80956. doi: 10.7554/eLife.80956 (PMC9708074; doi:10.7554/eLife.80956)
Supplement: Figure 1—source data 2. — Related to Figure 1D. [file elife-80956-fig1-data2.xlsx]

## Sheet: Sheet1
Figure 1 - Source Data 2
Related to Figure 1D
stage	phenotype	percentage	trials	n	Total (N)	Average
early	Fused egg chambers	0.08	T1	85	280	0.0605326
early	Fused egg chambers	0.0357143	T2	42
early	Fused egg chambers	0.00809717	T3	47
early	Fused egg chambers	0.0503597	T4	76
early	Fused egg chambers	0.128492	T5	30
mid	Multilayer	0.808571	T1	85	280	0.832477
mid	Multilayer	0.923469	T2	42
mid	Multilayer	0.8583	T3	47
mid	Multilayer	0.884892	T4	76
mid	Multilayer	0.687151	T5	30
late	Germline cell-death	0.614286	T1	85	280	0.518599
late	Germline cell-death	0.627551	T2	42
late	Germline cell-death	0.534413	T3	47
late	Germline cell-death	0.442446	T4	76
late	Germline cell-death	0.374302	T5	30
