# Supplementary material for: Single-cell transcriptomics identifies Keap1-Nrf2 regulated collective invasion in a Drosophila tumor model
Source: eLife. 2022 Nov 2;11:e80956. doi: 10.7554/eLife.80956 (PMC9708074; doi:10.7554/eLife.80956)
Supplement: Figure 4—source data 1. — Related to Figure 4C. [file elife-80956-fig4-data1.xlsx]

## Sheet: Sheet1
Figure 4 – source data 1: Regulon Specificity Scores (RSS) of regulons enriched in the subclusters of cluster 7 in tjTS>lglRNAi (72h) scRNA-Seq dataset.
Regulon	# genes	cluster 7_0	cluster 7_4	cluster 7_1	cluster 7_3	cluster 7_2
kay	(242g)	0.230025	0.175633	0.286887	0.183981	0.210748
Usf	(12g)	0.215285	0.154148	0.297553	0.202506	0.210969
Jra	(486g)	0.243806	0.176436	0.2827	0.195456	0.18995
srp	(365g)	0.236308	0.174494	0.289325	0.19069	0.196997
ftz-f1_extended	(82g)	0.239347	0.170779	0.288658	0.189719	0.19798
Atf3_extended	(266g)	0.264866	0.174842	0.271211	0.194172	0.182356
Hr4	(139g)	0.261564	0.181164	0.270954	0.19855	0.175533
Hnf4	(297g)	0.265982	0.176117	0.270606	0.198304	0.176625
h	(35g)	0.28596	0.150408	0.258523	0.194667	0.190966
Ets21C_extended	(114g)	0.302816	0.184051	0.234812	0.192169	0.170669
CrebA	(240g)	0.301451	0.180326	0.237055	0.201045	0.165058
