# Supplementary material for: Single-cell transcriptomics identifies Keap1-Nrf2 regulated collective invasion in a Drosophila tumor model
Source: eLife. 2022 Nov 2;11:e80956. doi: 10.7554/eLife.80956 (PMC9708074; doi:10.7554/eLife.80956)
Supplement: Figure 5—source data 1. — Related to Figure 5B. [file elife-80956-fig5-data1.xlsx]

## Sheet: Sheet1
Figure 5 - Source Data 1
Related to Figure 5B
sample	time	Replicate	percent
lglIR	early	1	8
lglIR	middle	1	80.86
lglIR	late	1	61.43
lglIR	early	2	3.57
lglIR	middle	2	92.35
lglIR	late	2	62.76
lglIR	early	3	0.81
lglIR	middle	3	85.83
lglIR	late	3	53.44
lglIR+cncIR	early	1	5.9
lglIR+cncIR	middle	1	25.06
lglIR+cncIR	late	1	12.53
lglIR+cncIR	early	2	5.94
lglIR+cncIR	middle	2	22.77
lglIR+cncIR	late	2	12.87
lglIR+cncIR	early	3	0.66
lglIR+cncIR	middle	3	33.77
lglIR+cncIR	late	3	1.32
lglIR+Keap1IR	early	1	1.75
lglIR+Keap1IR	middle	1	51.58
lglIR+Keap1IR	late	1	5.26
lglIR+Keap1IR	early	2	0.92
lglIR+Keap1IR	middle	2	32.26
lglIR+Keap1IR	late	2	10.6
lglIR+Keap1IR	early	3	0.76
lglIR+Keap1IR	middle	3	22.53
lglIR+Keap1IR	late	3	13.67
