# Supplementary material for: Single-cell transcriptomics identifies Keap1-Nrf2 regulated collective invasion in a Drosophila tumor model
Source: eLife. 2022 Nov 2;11:e80956. doi: 10.7554/eLife.80956 (PMC9708074; doi:10.7554/eLife.80956)
Supplement: Figure 6—source data 1. [file elife-80956-fig6-data1.xlsx]

## Sheet: Sheet1
Figure 6 - Source Data 1
Related to Figure 6B
sample.id	genotype	prop. volume
1	lglIR	0.159367
2	lglIR	0.282717
3	lglIR	0.182377
4	lglIR	0.133879
5	lglIR	0.318013
6	lglIR	0.187443
7	lglIR	0.304465
8	lglIR	0.185557
9	lglIR	0.20663
1	lglIR+Keap1	0.170139
2	lglIR+Keap1	0.406749
3	lglIR+Keap1	0.241681
4	lglIR+Keap1	0.252001
5	lglIR+Keap1	0.697528
6	lglIR+Keap1	0.257942
7	lglIR+Keap1	0.299067
8	lglIR+Keap1	0.33413
9	lglIR+Keap1	0.690662
10	lglIR+Keap1	0.684551
