# Supplementary material for: Single-cell transcriptomics identifies Keap1-Nrf2 regulated collective invasion in a Drosophila tumor model
Source: eLife. 2022 Nov 2;11:e80956. doi: 10.7554/eLife.80956 (PMC9708074; doi:10.7554/eLife.80956)
Supplement: Figure 6—source data 2. — Related to Figure 6D. [file elife-80956-fig6-data2.xlsx]

## Sheet: Sheet1
Figure 6 - Source Data 2
Related to Figure 6D
sample_id	genotype	phenotype	location	intensity
1	lglIR	multilayer	anterior epithelia	2.51871
2	lglIR	multilayer	anterior epithelia	1.69451
6	lglIR	multilayer	anterior epithelia	1.8533
9	lglIR	multilayer	anterior epithelia	2.95277
1	lglIR	multilayer	posterior epithelia	2.48808
2	lglIR	multilayer	posterior epithelia	2.07313
3	lglIR	multilayer	posterior epithelia	2.1671
4	lglIR	multilayer	posterior epithelia	1.99539
5	lglIR	multilayer	posterior epithelia	2.71688
6	lglIR	multilayer	posterior epithelia	2.07381
7	lglIR	multilayer	posterior epithelia	1.8551
8	lglIR	multilayer	posterior epithelia	2.97452
10	lglIR	multilayer	posterior epithelia	2.66396
1	lglIR	monolayer	lateral epithelia	1.47189
2	lglIR	monolayer	lateral epithelia	1.46907
3	lglIR	monolayer	lateral epithelia	1.44727
4	lglIR	monolayer	lateral epithelia	1.47268
5	lglIR	monolayer	lateral epithelia	1.45057
7	lglIR	monolayer	lateral epithelia	1.44545
8	lglIR	monolayer	lateral epithelia	1.43692
9	lglIR	monolayer	lateral epithelia	1.43524
10	lglIR	monolayer	lateral epithelia	1.4423
1	lglIR+Keap1	multilayer	anterior epithelia	2.75783
2	lglIR+Keap1	multilayer	anterior epithelia	3.22692
3	lglIR+Keap1	multilayer	anterior epithelia	2.20933
4	lglIR+Keap1	multilayer	anterior epithelia	2.36728
5	lglIR+Keap1	multilayer	anterior epithelia	3.12952
6	lglIR+Keap1	multilayer	anterior epithelia	3.38152
7	lglIR+Keap1	multilayer	anterior epithelia	2.97115
9	lglIR+Keap1	multilayer	anterior epithelia	3.02189
1	lglIR+Keap1	multilayer	posterior epithelia	2.42967
2	lglIR+Keap1	multilayer	posterior epithelia	2.79729
3	lglIR+Keap1	multilayer	posterior epithelia	2.71121
4	lglIR+Keap1	multilayer	posterior epithelia	4.31043
5	lglIR+Keap1	multilayer	posterior epithelia	3.41966
6	lglIR+Keap1	multilayer	posterior epithelia	3.43658
7	lglIR+Keap1	multilayer	posterior epithelia	2.52151
8	lglIR+Keap1	multilayer	posterior epithelia	2.55866
9	lglIR+Keap1	multilayer	posterior epithelia	3.47726
10	lglIR+Keap1	multilayer	posterior epithelia	3.10799
1	lglIR+Keap1	monolayer	lateral epithelia	1.4901
2	lglIR+Keap1	monolayer	lateral epithelia	1.53966
3	lglIR+Keap1	monolayer	lateral epithelia	1.58845
4	lglIR+Keap1	monolayer	lateral epithelia	1.36886
5	lglIR+Keap1	monolayer	lateral epithelia	1.4489
6	lglIR+Keap1	monolayer	lateral epithelia	1.47428
7	lglIR+Keap1	monolayer	lateral epithelia	1.41218
8	lglIR+Keap1	monolayer	lateral epithelia	1.53409
9	lglIR+Keap1	monolayer	lateral epithelia	1.50867
10	lglIR+Keap1	monolayer	lateral epithelia	1.32119
