# Supplementary material for: Single-cell transcriptomics identifies Keap1-Nrf2 regulated collective invasion in a Drosophila tumor model
Source: eLife. 2022 Nov 2;11:e80956. doi: 10.7554/eLife.80956 (PMC9708074; doi:10.7554/eLife.80956)
Supplement: Source data 1. [file elife-80956-data1.xlsx]

## Sheet: Step2_MotifEnrichment
Source Data 1: Enriched transcription-factor binding motifs detected in genes expressed in the cells of cluster 7.
motifDb	geneSet	motif	NES	AUC	highlightedTFs	TFinDB	TF_highConf	TF_lowConf	nEnrGenes	rankAtMax	enrichedGenes
5kbUpTx	Abl_w001	transfac_pro__M08187	3.77	0.0516	Abl	**	Abl (inferredBy_Orthology).		632	2941	14-3-3epsilon;14-3-3zeta;18w;Abl;Acsl;Act5C;Adi1;Adk3;AGO1;Akap200;Akt1;alpha-Man-IIb;AMPdeam;aop;AP-1gamma;AP-2alpha;aPKC;Aps;apt;Arf79F;Argk;arm;Arp2;aru;Asx;Atet;Atf3;Atg1;Atg17;Atg18a;Atg8a;Atpalpha;Atx2;babo;bark;baz;bbg;beat-IIIc;ben;Best1;beta-Spec;betaTub60D;betaTub97EF;bif;Bmcp;bou;brat;Bsg;BtbVII;Btk29A;bun;Bx;C3G;cact;Cam;CanA-14F;CAP;caps;capt;capu;CASK;Cbl;cdc14;Cdc42;CdGAPr;cdi;ced-…
5kbUpTx	Atf-2_w001	transfac_pro__M07678	4.8	0.0573	Atf-2	*	crc (directAnnotation).	Atf-2; Atf3; CG44247; CrebA; CrebB; Jra; kay (inferredBy_MotifSimilarity). Xbp1 (inferredBy_MotifSimilarity_n_Orthology).	8	288	cdc14;CG14985;CIAPIN1;Dhc64C;how;mgl;Myo31DF;trx
5kbUpTx	Atf-2_w001	factorbook__v-JUN	3.72	0.0475	Atf-2	*	Jra (inferredBy_Orthology).	Atf-2; Atf3; Atf6; CG44247; CrebA; CrebB; crc; kay (inferredBy_MotifSimilarity). Xbp1 (inferredBy_MotifSimilarity_n_Orthology).	13	801	cdc14;CG14985;CG34383;CIAPIN1;CrebA;Dhc64C;hng3;how;Klp98A;Myo31DF;Plc21C;Slik;trx
5kbUpTx	Atf-2_w001	cisbp__M4557	3.69	0.0473	Atf-2	*	Jra (inferredBy_Orthology).	Atf-2; Atf3; Atf6; CG44247; CrebA; CrebB; crc; kay (inferredBy_MotifSimilarity). Xbp1 (inferredBy_MotifSimilarity_n_Orthology).	16	1149	cdc14;CG13506;CG14985;CG30456;CG34383;CIAPIN1;ckn;CrebA;Dhc64C;hng3;how;Klp98A;Myo31DF;Plc21C;Slik;trx
5kbUpTx	Atf-2_w001	homer__ATGACGTCATCC_c-Jun-CRE	3.68	0.0472	Atf-2	*		Atf-2; Atf3; Atf6; CG44247; CrebA; CrebB; Jra; crc; kay (inferredBy_MotifSimilarity). Xbp1 (inferredBy_MotifSimilarity_n_Orthology).	5	91	cdc14;CG34383;Dhc64C;Klp98A;Myo31DF
5kbUpTx	Atf-2_w001	homer__ATGACGTCATCN_JunD	3.55	0.046	Atf-2	*	Jra (inferredBy_Orthology).	Atf-2; Atf3; Atf6; CG44247; CrebA; CrebB; cnc; crc; kay (inferredBy_MotifSimilarity). Xbp1 (inferredBy_MotifSimilarity_n_Orthology).	6	193	cdc14;CG34383;CIAPIN1;Dhc64C;Klp98A;Myo31DF
5kbUpTx	Atf-2_w001	cisbp__M5952	3.54	0.0459	Atf-2	*	Xbp1 (inferredBy_Orthology).	Atf-2; Atf3; Atf6; CG44247; CrebA; CrebB; Jra; crc; kay (inferredBy_MotifSimilarity).	8	422	cdc14;CG14985;CG34383;CIAPIN1;Dhc64C;mgl;Myo31DF;trx
5kbUpTx	Atf-2_w001	taipale__XBP1_DBD_GATGACGTCATC	3.53	0.0458	Atf-2	*	Xbp1 (inferredBy_Orthology).	Atf-2; Atf3; Atf6; CG44247; CrebA; CrebB; Jra; crc; kay (inferredBy_MotifSimilarity).	8	420	cdc14;CG14985;CG34383;CIAPIN1;Dhc64C;mgl;Myo31DF;trx
5kbUpTx	Atf-2_w001	transfac_pro__M01187	3.49	0.0454	Atf-2	*		Atf-2; Atf3; CG44247; CrebA; CrebB; Jra; crc; kay (inferredBy_MotifSimilarity). E2f1; Xbp1 (inferredBy_MotifSimilarity_n_Orthology).	6	232	cdc14;CG30456;CIAPIN1;Dhc64C;mgl;Myo31DF
5kbUpTx	Atf-2_w001	transfac_pro__M07680	3.49	0.0454	Atf-2	*	CrebA (directAnnotation).	Atf-2; Atf3; Atf6; CG44247; CrebB; Jra; crc; kay (inferredBy_MotifSimilarity). Xbp1 (inferredBy_MotifSimilarity_n_Orthology).	6	170	cdc14;CG34383;CIAPIN1;Dhc64C;mgl;Myo31DF
5kbUpTx	Atf-2_w001	jaspar__MA1069.1	3.2	0.0428	Atf-2	*		Atf-2; Atf3; Atf6; CG44247; CrebA; CrebB; Jra; crc; kay (inferredBy_MotifSimilarity). Xbp1 (inferredBy_MotifSimilarity_n_Orthology).	7	332	cdc14;CG30456;CG34383;CIAPIN1;CrebA;Dhc64C;Myo31DF
5kbUpTx	Atf-2_w001	cisbp__M0265	3.15	0.0423	Atf-2	*		Atf-2; Atf3; Atf6; CG44247; CrebA; CrebB; Jra; crc; kay (inferredBy_MotifSimilarity). Xbp1 (inferredBy_MotifSimilarity_n_Orthology).	6	251	cdc14;CG30456;CG34383;CIAPIN1;Dhc64C;Myo31DF
5kbUpTx	Atf-2_w001	cisbp__M0283	3.1	0.0419	Atf-2	*		Atf-2; Atf3; Atf6; CG44247; CrebA; CrebB; Jra; crc; kay (inferredBy_MotifSimilarity). Xbp1 (inferredBy_MotifSimilarity_n_Orthology).	7	266	cdc14;CG30456;CG34383;CIAPIN1;CrebA;Dhc64C;Myo31DF
5kbUpTx	Atf-2_w001	swissregulon__hs__JUN.p2	3.07	0.0416	Atf-2	*	Jra (inferredBy_Orthology).	Atf-2; Atf3; Atf6; CG44247; CrebA; CrebB; crc; kay (inferredBy_MotifSimilarity). Xbp1 (inferredBy_MotifSimilarity_n_Orthology).	7	307	cdc14;CG30456;CG34383;CIAPIN1;CrebA;Dhc64C;Myo31DF
5kbUpTx	Atf-2_w001	cisbp__M5323	3.03	0.0412	Atf-2	*		Atf-2; Atf3; Atf6; CG44247; CrebA; CrebB; Jra; kay (inferredBy_MotifSimilarity). Xbp1 (inferredBy_MotifSimilarity_n_Orthology).	5	113	cdc14;CG34383;CIAPIN1;Dhc64C;Myo31DF
5kbUpTx	Atf-2_w001	taipale__CREB3_full_NNRTGACGTCAYCN	3.01	0.0411	Atf-2	*		Atf-2; Atf3; Atf6; CG44247; CrebA; CrebB; Jra; kay (inferredBy_MotifSimilarity). Xbp1 (inferredBy_MotifSimilarity_n_Orthology).	5	107	cdc14;CG34383;CIAPIN1;Dhc64C;Myo31DF
5kbUpTx	Atf3_w001	transfac_pro__M07678	3.08	0.0699	Atf3	*	crc (directAnnotation).	Atf-2; Atf3; CG44247; CrebA; CrebB; Jra; kay (inferredBy_MotifSimilarity). Xbp1 (inferredBy_MotifSimilarity_n_Orthology).	137	1008	Acsl;alpha-Spec;Amph;AnxB9;aop;AP-1gamma;Arc2;bbc;cbt;CenB1A;CG10365;CG12065;CG12290;CG12945;CG13117;CG13887;CG13917;CG14207;CG17746;CG31176;CG32369;CG32521;CG34325;CG34417;CG3638;CG3655;CG42394;CG42673;CG42674;CG42748;CG43658;CG44085;CG5151;CG5399;CG6051;CG6231;CG6767;CG7029;CG8547;CG8620;CG9932;cher;chrb;cnc;CtBP;cv-2;DOR;Dys;E23;Eip63E;Fas2;FBXO11;fend;Fit1;fs(1)h;Gclc;GEFmeso;glec;Glut4EF;gpp…
5kbUpTx	Atf6_top50	cisbp__M3447	3.87	0.0746	Atf6	*	Xbp1 (inferredBy_Orthology).	Atf6; CrebA (inferredBy_MotifSimilarity).	4	199	beat-IIIc;CG13366;CG34382;dysc
5kbUpTx	Atf6_top50	transfac_public__M00538	3.67	0.0717	Atf6	*	Xbp1 (inferredBy_Orthology).	Atf6; CrebA (inferredBy_MotifSimilarity).	4	230	beat-IIIc;CG13366;CG34382;dysc
5kbUpTx	BEAF-32_w001	jaspar__MA0536.1	6.54	0.0366	BEAF-32	*		BEAF-32; pnr (inferredBy_MotifSimilarity).	590	4822	128up;14-3-3epsilon;14-3-3zeta;Aatf;AdenoK;Adk2;AGO2;Ahcy;AIMP2;AlaRS;Alg-2;alien;aralar1;Arf79F;ArfGAP1;Arpc4;Art1;Art7;AsnRS;AspRS;Atg12;Atg3;Atox1;ATPsynCF6;ATPsynF;ATPsynG;babos;Bacc;bai;Bap55;Bap60;bbg;BEAF-32;beg;ben;beta-Man;betaTub56D;betaTub97EF;bic;BicD;Bka;bonsai;BuGZ;bur;bys;CaBP1;Cat;Catsup;Cbp80;Ccs;Cdc37;CDK2AP1;cg;CG10139;CG10286;CG10340;CG10343;CG10470;CG10543;CG10565;CG10576;CG1…
5kbUpTx	BEAF-32_w001	cisbp__M2330	6.47	0.0363	BEAF-32	*	pnr (directAnnotation).	BEAF-32 (inferredBy_MotifSimilarity).	594	4893	128up;14-3-3epsilon;14-3-3zeta;26-29-p;Aatf;AdenoK;Adk2;AGO2;Ahcy;AIMP2;AlaRS;Alg-2;alien;aralar1;Arf79F;ArfGAP1;Arpc4;Art1;Art7;AsnRS;AspRS;Atg12;Atg3;Atox1;ATPsynCF6;ATPsynF;ATPsynG;Bacc;bai;Bap55;Bap60;bbg;BEAF-32;beg;betaTub56D;betaTub97EF;bic;BicD;Bka;bonsai;BuGZ;bur;bys;CaBP1;Cat;Catsup;Ccs;Cdc37;CDK2AP1;cg;CG10139;CG10286;CG10340;CG10343;CG10470;CG10543;CG10565;CG10576;CG10932;CG11030;CG11…
5kbUpTx	BEAF-32_w001	cisbp__M2325	6.06	0.0347	BEAF-32	**	BEAF-32 (directAnnotation).	pnr (inferredBy_MotifSimilarity).	582	4992	128up;14-3-3epsilon;14-3-3zeta;Aatf;AdenoK;AdSS;AGO2;Ahcy;AIMP2;AlaRS;Alg-2;alien;Arf79F;ArfGAP1;Arp3;Arpc4;Art1;Art7;asf1;AsnRS;AspRS;Atg12;Atg3;Atox1;ATPsyndelta;ATPsynF;ATPsynG;babos;Bacc;bai;Bap55;Bap60;bbg;BEAF-32;beg;ben;beta-PheRS;betaTub56D;betaTub97EF;bic;BicD;Bka;bonsai;BuGZ;bur;bys;CaBP1;Cam;Capr;Cat;Catsup;Cbp80;Ccs;CDK2AP1;cg;CG10139;CG10286;CG10340;CG10470;CG10565;CG10576;CG11030;CG…
5kbUpTx	BEAF-32_w001	jaspar__MA0529.1	5.88	0.034	BEAF-32	*		BEAF-32; pnr (inferredBy_MotifSimilarity).	548	4819	128up;14-3-3epsilon;14-3-3zeta;Aatf;AdenoK;AdSS;AGO2;Ahcy;AIMP2;Alg-2;Arf79F;ArfGAP1;Arpc4;Art1;Art7;AsnRS;AspRS;Atg12;Atg3;Atox1;ATPsynCF6;ATPsyndelta;ATPsynF;babos;Bacc;bai;Bap55;Bap60;bbg;BEAF-32;ben;beta-PheRS;betaTub56D;betaTub97EF;bic;BicD;Bka;bonsai;BuGZ;bys;CaBP1;Cam;Capr;Cat;Catsup;Cbp80;Ccs;CDK2AP1;cg;CG10139;CG10286;CG10340;CG10470;CG10565;CG10576;CG11030;CG11076;CG11077;CG11137;CG1116…
5kbUpTx	bigmax_top50	cisbp__M4646	4.1	0.0454	bigmax	*	Max (inferredBy_Orthology).	Mitf; Usf; bigmax (inferredBy_MotifSimilarity_n_Orthology).	1	24	fbp
5kbUpTx	bigmax_top50	cisbp__M2956	4.01	0.0445	bigmax	*	tgo (inferredBy_Orthology).	bigmax (inferredBy_MotifSimilarity).	1	34	fbp
5kbUpTx	bigmax_top50	transfac_public__M00236	4.01	0.0445	bigmax	*	tgo (inferredBy_Orthology).	bigmax (inferredBy_MotifSimilarity).	1	34	fbp
5kbUpTx	bigmax_top50	transfac_public__M00121	4.01	0.0445	bigmax	*	Usf (inferredBy_Orthology).	SREBP; bigmax (inferredBy_MotifSimilarity). Max; Mitf; Myc; tgo (inferredBy_MotifSimilarity_n_Orthology).	1	34	fbp
5kbUpTx	bigmax_top50	cisbp__M4080	4	0.0444	bigmax	*	Usf (inferredBy_Orthology).	SREBP; bigmax (inferredBy_MotifSimilarity). Max; Mitf; Myc; tgo (inferredBy_MotifSimilarity_n_Orthology).	1	35	fbp
5kbUpTx	bigmax_top50	cisbp__M4081	4	0.0444	bigmax	*	Usf (inferredBy_Orthology).	SREBP; bigmax; cyc (inferredBy_MotifSimilarity). Max; Mitf; Mondo; tgo (inferredBy_MotifSimilarity_n_Orthology).	1	35	fbp
5kbUpTx	bigmax_top50	cisbp__M0181	3.98	0.0442	bigmax	**	bigmax (inferredBy_Orthology).	Mondo (inferredBy_MotifSimilarity). tgo (inferredBy_MotifSimilarity_n_Orthology).	2	434	Fadd;fbp
5kbUpTx	bigmax_top50	transfac_public__M00122	3.95	0.0439	bigmax	*	Usf (inferredBy_Orthology).	SREBP; bigmax; cyc (inferredBy_MotifSimilarity). Max; Mitf; Mondo; tgo (inferredBy_MotifSimilarity_n_Orthology).	1	40	fbp
5kbUpTx	bigmax_top50	transfac_public__M00539	3.65	0.0408	bigmax	*	tgo (inferredBy_Orthology).	SREBP; bigmax; cyc (inferredBy_MotifSimilarity). Mitf; Mondo; Usf (inferredBy_MotifSimilarity_n_Orthology).	1	74	fbp
5kbUpTx	bigmax_top50	taipale__USF1_DBD_RTCACGTGAY	3.64	0.0407	bigmax	*	Usf (inferredBy_Orthology).	SREBP; bigmax; cwo; cyc (inferredBy_MotifSimilarity). Mitf; Mondo; tgo (inferredBy_MotifSimilarity_n_Orthology).	1	75	fbp
5kbUpTx	bigmax_top50	cisbp__M2957	3.61	0.0404	bigmax	*	tgo (inferredBy_Orthology).	SREBP; bigmax; cyc (inferredBy_MotifSimilarity). Mitf; Mondo; Usf (inferredBy_MotifSimilarity_n_Orthology).	1	146	fbp
5kbUpTx	bigmax_top50	transfac_pro__M07635	3.6	0.0403	bigmax	*		Mitf; SREBP; cwo; cyc; tgo (inferredBy_MotifSimilarity). Mondo; Usf; bigmax; cnc (inferredBy_MotifSimilarity_n_Orthology).	1	146	fbp
5kbUpTx	bigmax_top50	cisbp__M5943	3.59	0.0402	bigmax	*	Usf (inferredBy_Orthology).	SREBP; bigmax; cwo; cyc (inferredBy_MotifSimilarity). Mitf; Mondo; tgo (inferredBy_MotifSimilarity_n_Orthology).	1	146	fbp
5kbUpTx	bigmax_top50	taipale__TFEB_full_RTCACGTGAY	3.15	0.0356	bigmax	*	Mitf (inferredBy_Orthology).	SREBP; Usf; bigmax; cwo; cyc (inferredBy_MotifSimilarity). Mondo; cnc; tgo (inferredBy_MotifSimilarity_n_Orthology).	1	146	fbp
5kbUpTx	bigmax_top50	cisbp__M5931	3.06	0.0347	bigmax	*	Mitf (inferredBy_Orthology).	SREBP; Usf; bigmax; cwo; cyc (inferredBy_MotifSimilarity). Mondo; cnc; tgo (inferredBy_MotifSimilarity_n_Orthology).	1	146	fbp
5kbUpTx	bigmax_top50perTarget	cisbp__M4646	4.71	0.0323	bigmax	*	Max (inferredBy_Orthology).	Mitf; Usf; bigmax (inferredBy_MotifSimilarity_n_Orthology).	4	587	AdenoK;Fadd;fbp;Gclm
5kbUpTx	bigmax_top50perTarget	cisbp__M4080	4.25	0.0295	bigmax	*	Usf (inferredBy_Orthology).	SREBP; bigmax (inferredBy_MotifSimilarity). Max; Mitf; Myc; tgo (inferredBy_MotifSimilarity_n_Orthology).	2	38	fbp;Gclm
5kbUpTx	bigmax_top50perTarget	transfac_public__M00121	4.23	0.0294	bigmax	*	Usf (inferredBy_Orthology).	SREBP; bigmax (inferredBy_MotifSimilarity). Max; Mitf; Myc; tgo (inferredBy_MotifSimilarity_n_Orthology).	2	44	fbp;Gclm
5kbUpTx	bigmax_top50perTarget	cisbp__M4081	4.06	0.0283	bigmax	*	Usf (inferredBy_Orthology).	SREBP; bigmax; cyc (inferredBy_MotifSimilarity). Max; Mitf; Mondo; tgo (inferredBy_MotifSimilarity_n_Orthology).	10	2802	AdenoK;AsnS;CG11882;CG14688;CG18622;CG9286;Fadd;fbp;Gclm;rdgBbeta
5kbUpTx	bigmax_top50perTarget	transfac_public__M00122	3.97	0.0278	bigmax	*	Usf (inferredBy_Orthology).	SREBP; bigmax; cyc (inferredBy_MotifSimilarity). Max; Mitf; Mondo; tgo (inferredBy_MotifSimilarity_n_Orthology).	10	2847	AdenoK;AsnS;CG11882;CG14688;CG18622;CG9286;Fadd;fbp;Gclm;rdgBbeta
5kbUpTx	bigmax_top50perTarget	taipale__USF1_DBD_RTCACGTGAY	3.67	0.0259	bigmax	*	Usf (inferredBy_Orthology).	SREBP; bigmax; cwo; cyc (inferredBy_MotifSimilarity). Mitf; Mondo; tgo (inferredBy_MotifSimilarity_n_Orthology).	2	116	fbp;Gclm
5kbUpTx	bigmax_top50perTarget	cisbp__M5943	3.63	0.0257	bigmax	*	Usf (inferredBy_Orthology).	SREBP; bigmax; cwo; cyc (inferredBy_MotifSimilarity). Mitf; Mondo; tgo (inferredBy_MotifSimilarity_n_Orthology).	2	116	fbp;Gclm
5kbUpTx	bigmax_top50perTarget	cisbp__M5107	3.21	0.0231	bigmax	*	Mondo (directAnnotation).	bigmax (inferredBy_MotifSimilarity).	3	461	CG11334;fbp;Gclm
5kbUpTx	bigmax_w001	cisbp__M0187	3.51	0.0192	bigmax	*	SREBP (inferredBy_Orthology).	Mitf; Mondo; Usf; bigmax (inferredBy_MotifSimilarity_n_Orthology).	43	278	Arl1;brm;bru2;cbt;CG2246;CG31098;CG3902;CG42724;CG4364;CG6767;CG9240;Clic;Dek;Gclm;Gmap;Hmgs;hts;Lar;lid;Lpin;Mi-2;Mkp3;NaPi-III;Pdp1;Pino;Pis;poly;ppl;Prosap;pyd;RNASEK;sm;Tom7;Trap1;Vha14-1;Vha16-1;Vha26;Vha36-1;Vha44;Vha55;Vha68-2;VhaAC45;Xbp1
5kbUpTx	BtbVII_w001	transfac_pro__M07857	3.64	0.0545	BtbVII	**	BtbVII (directAnnotation).		256	4484	26-29-p;aay;Abi;Abl;Acsl;Adgf-A;AhcyL1;Ank;AP-2alpha;Asx;Atg101;Atpalpha;Baldspot;bel;Best1;blow;BtbVII;btsz;CAH2;CaMKII;CAP;Caper;Capr;cdc14;cdi;ced-6;CG10082;CG10089;CG10479;CG11050;CG1146;CG12065;CG12655;CG13117;CG13124;CG13921;CG14073;CG15211;CG15309;CG17508;CG31038;CG31523;CG31650;CG31715;CG32264;CG32365;CG32369;CG32767;CG32772;CG32850;CG3295;CG33229;CG3402;CG34126;CG34383;CG34417;CG3726;CG4…
5kbUpTx	Cf2_w001	transfac_public__M00013	3.08	0.045	Cf2	**	Cf2 (directAnnotation).		244	4831	26-29-p;4E-T;Abl;Abp1;Adi1;Adk1;ago;AGO1;AhcyL1;Ank;AnxB11;AP-1gamma;apt;ari-2;Asph;Atf3;B4;babo;Bx;CAH2;CalpA;ced-6;Cerk;cert;Cf2;CG10082;CG10353;CG10444;CG10543;CG11360;CG12065;CG12163;CG12290;CG12945;CG13124;CG13252;CG13384;CG13917;CG14441;CG14817;CG15309;CG1673;CG16791;CG18508;CG30089;CG30377;CG31635;CG3164;CG31808;CG32066;CG32147;CG32369;CG32485;CG32549;CG32772;CG32803;CG3558;CG4041;CG4101;C…
5kbUpTx	Cf2_w001	cisbp__M2544	3.08	0.0449	Cf2	**	Cf2 (directAnnotation).		244	4824	26-29-p;4E-T;Abl;Abp1;Adi1;Adk1;ago;AGO1;AhcyL1;Ank;AnxB11;AP-1gamma;apt;ari-2;Asph;Atf3;B4;babo;Bx;CAH2;CalpA;ced-6;Cerk;cert;Cf2;CG10082;CG10353;CG10444;CG10543;CG11360;CG12065;CG12163;CG12290;CG12945;CG13124;CG13252;CG13384;CG13917;CG14441;CG14817;CG15309;CG1673;CG16791;CG18508;CG30089;CG30377;CG31635;CG3164;CG31808;CG32066;CG32147;CG32369;CG32485;CG32549;CG32772;CG32803;CG3558;CG4041;CG4101;C…
5kbUpTx	CG12054_w001	cisbp__M0530	3.03	0.0431	CG12054	**	CG12054 (inferredBy_Orthology).		103	491	14-3-3epsilon;Adi1;ben;br;Bsg;Btk29A;bun;CaBP1;Cam;cg;CG14073;CG1888;CG2865;CG31195;CG34417;CG3655;CG3726;CG43658;CG43736;CG5151;CG8034;CG9932;CkIalpha;CkIIbeta;cnc;cpb;cpo;CrebA;crol;ctp;CycG;Cyp18a1;Dl;dnc;dom;ebi;EcR;ed;eIF5B;Eip75B;Eip93F;fax;Fmr1;fok;fru;fs(1)h;ftz-f1;GEFmeso;Glut4EF;h;HDAC4;hdc;heph;hid;Hr4;Hsc70-3;Imp;Indy;Inx3;klu;kst;lawc;Lerp;Lk6;lola;mamo;Mapmodulin;mask;mei-P26;mgl;Mn…
5kbUpTx	CG12071_top50	transfac_pro__M06297	3.11	0.0905	CG12071	**	CG12071 (inferredBy_Orthology).		5	252	B4;edl;mura;Psc;Ptp99A
5kbUpTx	CG12071_w001	transfac_pro__M02827	3.26	0.0523	CG12071	**	CG12071 (inferredBy_Orthology).		141	999	Adk3;Atg17;Atg8a;bark;ben;bif;Bmcp;bru2;cact;caps;CG10082;CG10383;CG10479;CG1129;CG13868;CG14073;CG14478;CG15309;CG2865;CG30089;CG30377;CG31635;CG32369;CG33298;CG33970;CG42238;CG42673;CG43736;CG45050;CG4768;CG5541;CG5953;CG6191;CG6966;CG8180;CG8312;CG9008;CG9932;CHES-1-like;chrb;cic;Csk;csw;ct;cv-c;cwo;Cyp18a1;Dmtn;dos;Drak;Dyrk2;Ect4;Eip63E;Eip75B;Eip93F;elav;Fas2;Frl;ftz-f1;glec;Glut4EF;gpp;HDA…
5kbUpTx	CHES-1-like_top50perTarget	cisbp__M0748	3.05	0.108	CHES-1-like	*		CHES-1-like; slp1; slp2 (inferredBy_MotifSimilarity). FoxK; FoxP; fd102C; fd59A; fkh; foxo (inferredBy_MotifSimilarity_n_Orthology).	4	253	CG15309;dally;lbk;robo2
5kbUpTx	CHES-1-like_w001	cisbp__M0721	3.36	0.0463	CHES-1-like	*		CHES-1-like; bin; fd59A; slp1; slp2 (inferredBy_MotifSimilarity). FoxK; FoxP; croc; fd102C; fd64A; fkh; foxo (inferredBy_MotifSimilarity_n_Orthology).	596	2431	14-3-3epsilon;14-3-3zeta;18w;a;aay;Abl;Actn;Adi1;AdSS;AGO1;AhcyL1;Akap200;Aldh;alph;alpha-Est7;AMPdeam;aop;AP-1gamma;aPKC;apt;arm;Asap;ASPP;Atf3;Atg13;Atg17;Atg18a;Atg3;Atg8a;Atpalpha;babo;bark;bbg;ben;beta-Spec;betaTub60D;betaTub97EF;bif;Bmcp;bowl;brat;brk;bru2;Bsg;Btk29A;btsz;bun;c11.1;C3G;Cam;CaMKII;CanA-14F;CAP;capt;cdc14;cdi;ced-6;CenG1A;cer;cert;cg;CG10089;CG10383;CG10479;CG10543;CG10939;CG…
5kbUpTx	CHES-1-like_w001	hocomoco__FOXG1_HUMAN.H10MO.D	3.35	0.0462	CHES-1-like	*	slp1 (inferredBy_Orthology).	CHES-1-like; fd59A (inferredBy_MotifSimilarity). FoxP; croc; fd64A (inferredBy_MotifSimilarity_n_Orthology).	604	2338	14-3-3epsilon;14-3-3zeta;18w;aay;Abl;Act5C;Actn;Acyp2;Adi1;AGO1;alpha-Est7;alpha-Est9;AMPdeam;aop;AP-1gamma;AP-1sigma;aPKC;Aps;apt;Argk;arm;ASPP;Atf3;Atg13;Atg17;Atg18a;Atg4a;Atg8a;Atpalpha;babo;Baldspot;bbg;ben;Best1;beta-Spec;betaTub60D;betaTub97EF;bmm;bowl;brat;brk;bru2;Bsg;Btk29A;btsz;bun;bves;c11.1;C3G;Cam;CanA-14F;CAP;Caper;capt;Cbl;cdc14;Cdep;cdi;ced-6;CenG1A;cer;cert;Cf2;cg;CG10089;CG1036…
5kbUpTx	CHES-1-like_w001	cisbp__M0718	3.21	0.0454	CHES-1-like	*	FoxK (inferredBy_Orthology).	CHES-1-like; bin; slp1 (inferredBy_MotifSimilarity). FoxP; croc; fd102C; fd59A; fd64A; fkh; foxo (inferredBy_MotifSimilarity_n_Orthology).	479	1804	14-3-3zeta;18w;a;aay;Actn;Adi1;AdSS;AGO1;AhcyL1;Akap200;alpha-Est7;AMPdeam;aop;AP-1gamma;apt;arm;ASPP;Atf3;Atg17;Atg3;Atg8a;Atpalpha;babo;bark;bbg;ben;beta-Spec;betaTub60D;betaTub97EF;bowl;brat;brk;Bsg;bsk;Btk29A;btsz;bun;C3G;Cam;CaMKII;CanA-14F;CAP;capt;cdc14;cdi;ced-6;CenG1A;cer;cg;CG10383;CG10479;CG10543;CG10939;CG1129;CG11486;CG12004;CG12025;CG12054;CG12091;CG12576;CG13124;CG13252;CG13366;CG1…
5kbUpTx	CHES-1-like_w001	cisbp__M0749	3.21	0.0454	CHES-1-like	*	fd102C; foxo (inferredBy_Orthology).	CHES-1-like; FoxP; slp2 (inferredBy_MotifSimilarity). FoxK; bin; slp1 (inferredBy_MotifSimilarity_n_Orthology).	538	2150	14-3-3zeta;18w;a;aay;Abl;Actn;Adi1;AdSS;AGO1;AhcyL1;Akap200;Aldh;alpha-Est7;alpha-Man-IIb;alpha-Spec;AMPdeam;aop;AP-1gamma;aPKC;apt;arm;Asph;ASPP;Atf3;Atg17;Atg18a;Atg3;Atg8a;Atpalpha;bark;bbg;ben;beta-Spec;betaTub60D;betaTub97EF;bif;Bmcp;bowl;brat;brk;Bsg;Btk29A;btsz;bun;C3G;Cam;CanA-14F;CAP;capt;cdc14;cdi;ced-6;CenG1A;cer;cert;Cf2;cg;CG10089;CG10383;CG10479;CG10543;CG10939;CG1129;CG11486;CG1202…
5kbUpTx	CHES-1-like_w001	cisbp__M0750	3.16	0.0451	CHES-1-like	*	FoxP (inferredBy_Orthology).	CHES-1-like; bin; slp1 (inferredBy_MotifSimilarity). FoxK; bs; croc; fd59A; fd64A; fd96Ca; fd96Cb; fkh; foxo (inferredBy_MotifSimilarity_n_Orthology).	543	2186	14-3-3zeta;18w;a;aay;Abl;Acsl;Actn;Adi1;AdSS;AGO1;AhcyL1;Akap200;Aldh;alpha-Est7;alpha-Spec;AMPdeam;aop;AP-1gamma;apt;arm;ASPP;Atf3;Atg13;Atg17;Atg3;Atg8a;Atpalpha;babo;bbg;ben;beta-Spec;betaTub60D;betaTub97EF;bif;Bmcp;bowl;brat;brk;bru2;Bsg;Btk29A;btsz;bun;bves;C3G;Cam;CaMKII;CanA-14F;CAP;capt;cdc14;cdi;ced-6;CenG1A;cer;cert;Cf2;cg;CG10383;CG10479;CG10543;CG1129;CG11486;CG12004;CG12025;CG12054;C…
5kbUpTx	CHES-1-like_w001	cisbp__M0727	3.05	0.0444	CHES-1-like	*		CHES-1-like; bin; fd59A; slp1; slp2 (inferredBy_MotifSimilarity). FoxK; FoxP; croc; fd102C; fd64A; fkh; foxo (inferredBy_MotifSimilarity_n_Orthology).	630	2620	14-3-3epsilon;14-3-3zeta;18w;a;aay;Abl;Actn;Acyp2;Adgf-A;Adi1;AGO1;AhcyL1;Akap200;Aldh;alph;alpha-Est7;alpha-Man-IIb;AMPdeam;aop;AP-1gamma;AP-1sigma;aPKC;apt;Argk;arm;ASPP;Atf3;Atg13;Atg17;Atg18a;Atg3;Atg8a;Atpalpha;Atx2;babo;bark;bbg;ben;Best1;beta-Spec;betaTub60D;betaTub97EF;Bmcp;bowl;brat;brk;bru2;Bsg;Btk29A;btsz;bun;c11.1;C3G;Cam;CanA-14F;CAP;Caper;capt;cdc14;cdi;ced-6;CenG1A;cer;Cf2;cg;CG100…
5kbUpTx	CHES-1-like_w001	cisbp__M0757	3.03	0.0443	CHES-1-like	*		CHES-1-like; bin; slp1 (inferredBy_MotifSimilarity). FoxK; FoxP; croc; fd102C; fd59A; fd64A; fkh; foxo (inferredBy_MotifSimilarity_n_Orthology).	659	2758	14-3-3epsilon;14-3-3zeta;18w;a;aay;Abl;Actn;Acyp2;Adgf-A;Adi1;AdSS;AGO1;AhcyL1;Akap200;alph;alpha-Est7;alpha-Spec;AMPdeam;aop;AP-1gamma;aPKC;apt;Argk;arm;ASPP;Atf3;Atg13;Atg17;Atg18a;Atg3;Atg8a;Atpalpha;Atx2;babo;Baldspot;bark;bbg;ben;Best1;beta-Spec;betaTub60D;betaTub97EF;Bmcp;bowl;brat;brk;bru2;Bsg;bsk;Btk29A;btsz;bun;bves;c11.1;C3G;Cam;CaMKII;CanA-14F;CAP;Caper;capt;cdc14;cdi;ced-6;CenG1A;cer;…
5kbUpTx	Cip4_top50	hdpi__TRIP10	3.41	0.103	Cip4	**	Cip4 (inferredBy_Orthology).		4	212	cv-2;dysc;KCNQ;Plc21C
5kbUpTx	cnc_top50	cisbp__M6038	6.71	0.228	cnc	*		kay (inferredBy_MotifSimilarity). Jra; cnc (inferredBy_MotifSimilarity_n_Orthology).	18	407	Btk29A;bun;CG5151;Chd64;cnc;CrebA;Fas1;insc;jvl;kuz;Lac;luna;Mlc-c;puc;scb;shep;Tm1;Xrp1
5kbUpTx	cnc_top50	taipale__Jdp2_DBD_ATGASTCAT_repr	6.7	0.228	cnc	*		kay (inferredBy_MotifSimilarity). Jra; cnc (inferredBy_MotifSimilarity_n_Orthology).	17	403	Btk29A;bun;CG5151;Chd64;cnc;CrebA;Fas1;insc;jvl;kuz;Lac;luna;Mlc-c;puc;scb;shep;Xrp1
5kbUpTx	cnc_top50	taipale_tf_pairs__BACH1_ATGACTCAT_HT	6.33	0.218	cnc	**	cnc (inferredBy_Orthology).		13	216	Btk29A;bun;CG5151;CrebA;Fas1;insc;jvl;kuz;Lac;Mlc-c;puc;shep;Xrp1
5kbUpTx	cnc_top50	cisbp__M5589	6.33	0.218	cnc	*		kay (inferredBy_MotifSimilarity). Jra; cnc (inferredBy_MotifSimilarity_n_Orthology).	13	206	Btk29A;bun;CG5151;CrebA;Fas1;jvl;kuz;Lac;luna;Mlc-c;puc;shep;Xrp1
5kbUpTx	cnc_top50	cisbp__M5587	6.12	0.213	cnc	*		Jra; kay (inferredBy_MotifSimilarity). cnc (inferredBy_MotifSimilarity_n_Orthology).	15	379	Btk29A;bun;CG5151;CrebA;Fas1;insc;jvl;kuz;Lac;luna;Mlc-c;puc;scb;shep;Xrp1
5kbUpTx	cnc_top50	taipale__JDP2_full_ATGASTCAT	6.1	0.212	cnc	*		kay (inferredBy_MotifSimilarity). Jra; cnc (inferredBy_MotifSimilarity_n_Orthology).	20	713	Btk29A;bun;CG5151;Chd64;cnc;CrebA;Csk;Fas1;insc;jvl;kuz;Lac;luna;Mlc-c;par-1;puc;scb;shep;Tm1;Xrp1
5kbUpTx	cnc_top50	taipale__JDP2_DBD_ATGASTCAT	6.09	0.212	cnc	*		Jra; kay (inferredBy_MotifSimilarity). cnc (inferredBy_MotifSimilarity_n_Orthology).	15	372	Btk29A;bun;CG5151;CrebA;Fas1;insc;jvl;kuz;Lac;luna;Mlc-c;puc;scb;shep;Xrp1
5kbUpTx	cnc_top50	taipale__NFE2_DBD_NATGASTCATN	5.92	0.208	cnc	**	cnc (inferredBy_Orthology).	Jra; kay (inferredBy_MotifSimilarity_n_Orthology).	24	961	baz;Btk29A;bun;CG5151;CG5953;Chd64;cnc;CrebA;Csk;Fas1;hid;insc;jvl;kuz;Lac;Lk6;luna;mbc;Mlc-c;puc;scb;shep;Tm1;Xrp1
5kbUpTx	cnc_top50	cisbp__M5659	5.79	0.204	cnc	**	cnc (inferredBy_Orthology).	Jra; kay (inferredBy_MotifSimilarity_n_Orthology).	24	1205	baz;Btk29A;bun;CG10939;CG5151;CG5953;Chd64;cnc;CrebA;Csk;Fas1;insc;jvl;kuz;Lac;Lk6;luna;Mlc-c;par-1;puc;scb;shep;Tm1;Xrp1
5kbUpTx	cnc_top50	cisbp__M4608	5.55	0.198	cnc	*	Jra (inferredBy_Orthology).	kay (inferredBy_MotifSimilarity). cnc (inferredBy_MotifSimilarity_n_Orthology).	26	1422	baz;Btk29A;bun;CG5151;CG5953;Chd64;cnc;CrebA;Csk;Fas1;hid;insc;jvl;Klp98A;kuz;Lac;luna;mbc;Mlc-c;Paip2;puc;scb;shep;Tm1;vari;Xrp1
5kbUpTx	cnc_top50	homer__ATGACTCATC_AP-1	5.5	0.197	cnc	*	Jra (inferredBy_Orthology).	kay (inferredBy_MotifSimilarity). cnc; maf-S; mor (inferredBy_MotifSimilarity_n_Orthology).	19	494	Btk29A;bun;CG5151;Chd64;cnc;CrebA;Fas1;insc;jvl;kuz;Lac;luna;mbc;Mlc-c;puc;scb;shep;Tm1;Xrp1
5kbUpTx	cnc_top50	hocomoco__JUND_HUMAN.H10MO.A	5.35	0.193	cnc	*	Jra (inferredBy_Orthology).	kay (inferredBy_MotifSimilarity). cnc (inferredBy_MotifSimilarity_n_Orthology).	26	1502	baz;Btk29A;bun;CG5151;CG5953;Chd64;cnc;CrebA;Csk;Fas1;hid;insc;jvl;Klp98A;kuz;Lac;luna;mbc;Mlc-c;Paip2;puc;scb;shep;Tm1;vari;Xrp1
5kbUpTx	cnc_top50	scertf__spivak.GCN4	5.35	0.193	cnc	*		Jra; kay (inferredBy_MotifSimilarity). NFAT; cnc (inferredBy_MotifSimilarity_n_Orthology).	12	259	Btk29A;bun;CG5151;CrebA;Fas1;insc;kuz;Lac;Mlc-c;puc;shep;Xrp1
5kbUpTx	cnc_top50	cisbp__M4570	5.31	0.192	cnc	*	Jra (inferredBy_Orthology).	cnc; kay; mor (inferredBy_MotifSimilarity_n_Orthology).	30	2275	baz;Btk29A;bun;CG10939;CG5151;CG5953;Chd64;cnc;CrebA;Csk;Fas1;hid;insc;jvl;Klp98A;kuz;Lac;Lk6;luna;mbc;Mlc-c;Paip2;par-1;puc;scb;shep;spin;Tm1;vari;Xrp1
5kbUpTx	cnc_top50	hocomoco__FOS_HUMAN.H10MO.A	5.28	0.191	cnc	*	kay (inferredBy_Orthology).	Jra (inferredBy_MotifSimilarity). cnc; mor (inferredBy_MotifSimilarity_n_Orthology).	24	1048	baz;Btk29A;bun;CG5151;CG5953;Chd64;cnc;CrebA;Csk;Fas1;insc;jvl;Klp98A;kuz;Lac;luna;mbc;Mlc-c;puc;scb;shep;Tm1;vari;Xrp1
5kbUpTx	cnc_top50	swissregulon__sacCer__GCN4	5.27	0.191	cnc	*		Jra; kay (inferredBy_MotifSimilarity). NFAT; cnc (inferredBy_MotifSimilarity_n_Orthology).	18	738	Btk29A;bun;CG5151;Chd64;cnc;CrebA;Csk;Fas1;insc;jvl;kuz;Lac;luna;Mlc-c;puc;scb;shep;Xrp1
5kbUpTx	cnc_top50	cisbp__M6318	5.22	0.189	cnc	*	Jra (inferredBy_Orthology).	kay (inferredBy_MotifSimilarity). cnc (inferredBy_MotifSimilarity_n_Orthology).	26	1550	baz;Btk29A;bun;CG5151;CG5953;Chd64;cnc;CrebA;Csk;Fas1;hid;insc;jvl;Klp98A;kuz;Lac;luna;mbc;Mlc-c;Paip2;puc;scb;shep;Tm1;vari;Xrp1
5kbUpTx	cnc_top50	yetfasco__YER064C_2094	5.2	0.189	cnc	*		Jra; kay (inferredBy_MotifSimilarity). cnc (inferredBy_MotifSimilarity_n_Orthology).	21	917	Btk29A;bun;CG5151;Chd64;cnc;CrebA;Csk;Fas1;hid;insc;jvl;kuz;Lac;luna;mbc;Mlc-c;puc;scb;shep;Tm1;Xrp1
5kbUpTx	cnc_top50	homer__GATGACTCATCN_Jun-AP1	5.11	0.186	cnc	*	Jra (inferredBy_Orthology).	kay (inferredBy_MotifSimilarity). cnc; mor (inferredBy_MotifSimilarity_n_Orthology).	23	1093	baz;Btk29A;bun;CG5151;CG5953;Chd64;cnc;CrebA;Fas1;hid;insc;jvl;kuz;Lac;luna;mbc;Mlc-c;puc;scb;shep;Tm1;vari;Xrp1
5kbUpTx	cnc_top50	hocomoco__FOSL2_HUMAN.H10MO.A	5.06	0.185	cnc	*	kay (inferredBy_Orthology).	Jra; cnc; mor (inferredBy_MotifSimilarity_n_Orthology).	26	1392	baz;Btk29A;bun;CG5151;CG5953;Chd64;cnc;CrebA;Csk;Fas1;hid;insc;jvl;Klp98A;kuz;Lac;luna;mbc;Mlc-c;Paip2;puc;scb;shep;Tm1;vari;Xrp1
5kbUpTx	cnc_top50	transfac_pro__M04693	5.06	0.185	cnc	*	kay (inferredBy_Orthology).	Jra (inferredBy_MotifSimilarity). NFAT; cnc (inferredBy_MotifSimilarity_n_Orthology).	32	2273	baz;Btk29A;bun;CG5151;CG5953;Chd64;cnc;CrebA;Csk;Fas1;hid;insc;jvl;Klp98A;kuz;Lac;Lk6;luna;mbc;Mlc-c;par-1;pes;puc;RNaseX25;Sap-r;scb;shep;Tm1;Tsp42Ee;vari;vsg;Xrp1
5kbUpTx	cnc_top50	cisbp__M4684	5.05	0.185	cnc	*		Jra; kay (inferredBy_MotifSimilarity). cnc (inferredBy_MotifSimilarity_n_Orthology).	35	2931	baz;Btk29A;bun;CG10939;CG5151;CG5953;Chd64;cnc;CrebA;Csk;Fas1;hid;insc;jvl;Klp98A;kuz;Lac;Lk6;luna;mbc;Mlc-c;Paip2;par-1;pes;puc;RNaseX25;Sap-r;scb;shep;spin;Tm1;Tsp42Ee;vari;vsg;Xrp1
5kbUpTx	cnc_top50	yetfasco__YEL009C_1363	4.93	0.182	cnc	*		Jra; kay (inferredBy_MotifSimilarity). NFAT; cnc; maf-S; tj (inferredBy_MotifSimilarity_n_Orthology).	20	786	Btk29A;bun;CG5151;Chd64;cnc;CrebA;Fas1;hid;insc;jvl;kuz;Lac;luna;Mlc-c;puc;scb;shep;Tm1;vari;Xrp1
5kbUpTx	cnc_top50	cisbp__M4506	4.91	0.181	cnc	*	Jra (inferredBy_Orthology).	kay (inferredBy_MotifSimilarity). cnc; mor (inferredBy_MotifSimilarity_n_Orthology).	24	1320	baz;Btk29A;bun;CG5151;CG5953;Chd64;cnc;CrebA;Csk;Fas1;hid;insc;jvl;kuz;Lac;luna;mbc;Mlc-c;puc;scb;shep;Tm1;vari;Xrp1
5kbUpTx	cnc_top50	hocomoco__FOSB_HUMAN.H10MO.C	4.7	0.176	cnc	*	kay (inferredBy_Orthology).	Jra (inferredBy_MotifSimilarity). cnc; mor (inferredBy_MotifSimilarity_n_Orthology).	27	1550	baz;Btk29A;bun;CG5151;CG5953;Chd64;cnc;CrebA;Csk;Fas1;hid;insc;jvl;Klp98A;kuz;Lac;luna;mbc;Mlc-c;Paip2;puc;scb;shep;spin;Tm1;vari;Xrp1
5kbUpTx	cnc_top50	cisbp__M4623	4.64	0.174	cnc	*	Jra (inferredBy_Orthology).	kay (inferredBy_MotifSimilarity). cnc (inferredBy_MotifSimilarity_n_Orthology).	24	1232	baz;Btk29A;bun;CG5151;CG5953;Chd64;cnc;CrebA;Csk;Fas1;insc;jvl;Klp98A;kuz;Lac;luna;mbc;Mlc-c;puc;scb;shep;Tm1;vari;Xrp1
5kbUpTx	cnc_top50	hocomoco__JUNB_HUMAN.H10MO.C	4.35	0.167	cnc	*	Jra (inferredBy_Orthology).	cnc; kay; mor (inferredBy_MotifSimilarity_n_Orthology).	28	1550	baz;Btk29A;bun;CG5151;CG5953;Chd64;cnc;CrebA;Csk;Fas1;hid;insc;jvl;Klp98A;kuz;Lac;luna;mbc;Mlc-c;Paip2;par-1;puc;RNaseX25;scb;shep;Tm1;vari;Xrp1
5kbUpTx	cnc_top50	cisbp__M6230	4.35	0.167	cnc	*	kay (inferredBy_Orthology).	Jra; cnc; mor (inferredBy_MotifSimilarity_n_Orthology).	26	1490	baz;Btk29A;bun;CG5151;CG5953;Chd64;cnc;CrebA;Csk;Fas1;hid;insc;jvl;Klp98A;kuz;Lac;luna;mbc;Mlc-c;Paip2;puc;scb;shep;Tm1;vari;Xrp1
5kbUpTx	cnc_top50	cisbp__M4607	4.31	0.166	cnc	*	kay (inferredBy_Orthology).	Jra (inferredBy_MotifSimilarity). cnc; maf-S (inferredBy_MotifSimilarity_n_Orthology).	31	2243	baz;Btk29A;bun;CG10939;CG5151;CG5953;Chd64;cnc;CrebA;Csk;Fas1;hid;insc;jvl;Klp98A;kuz;Lac;luna;mbc;Mlc-c;Paip2;par-1;pes;puc;RNaseX25;scb;shep;spin;Tm1;vari;Xrp1
5kbUpTx	cnc_top50	hocomoco__FOSL2_MOUSE.H10MO.A	4.23	0.163	cnc	*	kay (inferredBy_Orthology).	Jra; cnc; mor (inferredBy_MotifSimilarity_n_Orthology).	26	1567	baz;Btk29A;bun;CG5151;CG5953;Chd64;cnc;CrebA;Csk;Fas1;hid;insc;jvl;Klp98A;kuz;Lac;luna;mbc;Mlc-c;Paip2;puc;scb;shep;Tm1;vari;Xrp1
5kbUpTx	cnc_top50	transfac_pro__M04699	4.21	0.163	cnc	*	maf-S (inferredBy_Orthology).	cnc; tj (inferredBy_MotifSimilarity_n_Orthology).	13	360	Btk29A;bun;Chd64;cnc;jvl;kuz;Lac;mbc;pes;puc;Sap-r;shep;Tm1
5kbUpTx	cnc_top50	neph__UW.Motif.0001	4.2	0.163	cnc	*		kay (inferredBy_MotifSimilarity). Jra; cnc (inferredBy_MotifSimilarity_n_Orthology).	17	504	Btk29A;bun;CG5151;cnc;CrebA;Fas1;hid;insc;jvl;kuz;Lac;luna;Mlc-c;puc;shep;Tm1;Xrp1
5kbUpTx	cnc_top50	cisbp__M2979	4.04	0.159	cnc	**	cnc (inferredBy_Orthology).	Jra (inferredBy_MotifSimilarity_n_Orthology).	27	1573	baz;Btk29A;bun;CG5151;CG5953;Chd64;cnc;CrebA;Csk;Fas1;hid;insc;jvl;Klp98A;kuz;Lac;Lk6;luna;mbc;Mlc-c;par-1;puc;RNaseX25;scb;shep;Tm1;Xrp1
5kbUpTx	cnc_top50	homer__NNATGASTCATH_Fra1	4.03	0.158	cnc	*		Jra; kay (inferredBy_MotifSimilarity). cnc; mor (inferredBy_MotifSimilarity_n_Orthology).	27	1210	baz;Btk29A;bun;CG5151;Chd64;cnc;CrebA;Csk;Fas1;hid;insc;jvl;Klp98A;kuz;Lac;luna;mbc;Mlc-c;pes;puc;Sap-r;scb;shep;spin;Tm1;vari;Xrp1
5kbUpTx	cnc_top50	hocomoco__JUN_HUMAN.H10MO.A	4.01	0.158	cnc	*	Jra (inferredBy_Orthology).	kay (inferredBy_MotifSimilarity). cnc; mor (inferredBy_MotifSimilarity_n_Orthology).	20	715	Btk29A;bun;CG5151;Chd64;cnc;CrebA;Fas1;hid;insc;jvl;kuz;Lac;luna;mbc;Mlc-c;puc;scb;shep;Tm1;Xrp1
5kbUpTx	cnc_top50	cisbp__M6319	3.9	0.155	cnc	*	Jra (inferredBy_Orthology).	kay (inferredBy_MotifSimilarity). cnc; mor (inferredBy_MotifSimilarity_n_Orthology).	19	617	Btk29A;bun;CG5151;Chd64;cnc;CrebA;Fas1;hid;insc;kuz;Lac;luna;mbc;Mlc-c;puc;scb;shep;Tm1;Xrp1
5kbUpTx	cnc_top50	transfac_public__M00495	3.78	0.152	cnc	**	cnc (inferredBy_Orthology).	Jra (inferredBy_MotifSimilarity_n_Orthology).	26	1550	baz;Btk29A;bun;CG5151;CG5953;Chd64;cnc;CrebA;Csk;Fas1;insc;jvl;Klp98A;kuz;Lac;Lk6;luna;mbc;Mlc-c;par-1;puc;RNaseX25;scb;shep;Tm1;Xrp1
5kbUpTx	cnc_top50	yetfasco__YIL056W_2091	3.71	0.15	cnc	*		Jra; kay (inferredBy_MotifSimilarity). cnc; mor (inferredBy_MotifSimilarity_n_Orthology).	29	2118	baz;Btk29A;bun;CG5151;CG5953;Chd64;cnc;CrebA;Csk;Fas1;hid;insc;jvl;Klp98A;kuz;Lac;luna;mbc;Mlc-c;Paip2;par-1;pes;puc;Sap-r;scb;shep;Tm1;vari;Xrp1
5kbUpTx	cnc_top50	jaspar__MA0591.1	3.7	0.15	cnc	*	maf-S (inferredBy_Orthology).	Jra; cnc; kay; tj (inferredBy_MotifSimilarity_n_Orthology).	31	2759	baz;Btk29A;bun;CG34382;CG5151;CG5953;Chd64;cnc;CrebA;Csk;Dg;Fas1;hid;insc;jvl;kuz;Lac;LIMK1;luna;mbc;Paip2;par-1;pes;puc;Sap-r;scb;shep;spin;Tm1;vari;Xrp1
5kbUpTx	cnc_top50	transfac_public__M00490	3.68	0.149	cnc	**	cnc (inferredBy_Orthology).	Jra; kay (inferredBy_MotifSimilarity_n_Orthology).	25	1567	baz;Btk29A;bun;CG5151;CG5953;Chd64;cnc;CrebA;Csk;Fas1;hid;insc;jvl;Klp98A;kuz;Lac;luna;mbc;Mlc-c;par-1;puc;scb;shep;Tm1;Xrp1
5kbUpTx	cnc_top50	swissregulon__hs__NFE2L2.p2	3.64	0.148	cnc	**	cnc (inferredBy_Orthology).	maf-S (inferredBy_MotifSimilarity_n_Orthology).	36	3496	baz;Btk29A;bun;CG1572;CG34382;CG5151;CG5953;Chd64;cnc;CrebA;Csk;Dg;Fas1;hid;insc;jvl;Klp98A;kuz;Lac;LIMK1;Lk6;luna;mbc;Mlc-c;Paip2;par-1;pes;puc;Sap-r;scb;shep;spin;Tm1;vari;vsg;Xrp1
5kbUpTx	cnc_top50	homer__HTGCTGAGTCAT_Nrf2	3.58	0.147	cnc	**	cnc (inferredBy_Orthology).	maf-S; tj (inferredBy_MotifSimilarity_n_Orthology).	39	4780	baz;Btk29A;bun;CG1572;CG34382;CG5151;CG5953;CG7695;Chd64;cnc;CrebA;Csk;Dg;Fas1;hid;insc;jvl;Klp98A;kuz;Lac;Lamp1;LIMK1;Lk6;luna;mbc;Mlc-c;Paip2;par-1;pes;puc;RNaseX25;Sap-r;scb;shep;spin;Tm1;vari;vsg;Xrp1
5kbUpTx	cnc_top50	cisbp__M2980	3.58	0.147	cnc	**	cnc (inferredBy_Orthology).	Jra; kay (inferredBy_MotifSimilarity_n_Orthology).	23	1366	baz;Btk29A;bun;CG5151;Chd64;cnc;Csk;Fas1;hid;insc;jvl;Klp98A;kuz;Lac;luna;mbc;Mlc-c;par-1;puc;scb;shep;Tm1;Xrp1
5kbUpTx	cnc_top50	homer__GATGACTCAGCA_NF-E2	3.57	0.146	cnc	**	cnc (inferredBy_Orthology).	maf-S (inferredBy_MotifSimilarity). Jra; kay; tj (inferredBy_MotifSimilarity_n_Orthology).	34	3260	baz;Btk29A;bun;CG34382;CG5151;CG5953;Chd64;cnc;CrebA;Csk;Dg;Fas1;hid;insc;jvl;Klp98A;kuz;Lac;Lamp1;LIMK1;Lk6;luna;mbc;Paip2;par-1;pes;puc;Sap-r;scb;shep;spin;Tm1;vari;Xrp1
5kbUpTx	cnc_top50	cisbp__M4526	3.53	0.145	cnc	*	mor (inferredBy_Orthology).	Jra; cnc; ewg; kay; maf-S; tj (inferredBy_MotifSimilarity_n_Orthology).	28	1309	baz;Btk29A;bun;CG5151;CG5953;Chd64;cnc;CrebA;Csk;Fas1;hid;insc;jvl;Klp98A;kuz;Lac;luna;mbc;Mlc-c;Paip2;par-1;puc;scb;shep;spin;Tm1;vari;Xrp1
5kbUpTx	cnc_top50	cisbp__M6229	3.45	0.143	cnc	*	kay (inferredBy_Orthology).	Jra; cnc; ewg; maf-S; tj (inferredBy_MotifSimilarity_n_Orthology).	13	434	Btk29A;bun;CG5151;cnc;Fas1;insc;kuz;mbc;puc;scb;shep;Tm1;Xrp1
5kbUpTx	cnc_top50	cisbp__M6334	3.42	0.142	cnc	*	maf-S (inferredBy_Orthology).	tj (inferredBy_MotifSimilarity). cnc (inferredBy_MotifSimilarity_n_Orthology).	31	2214	baz;Btk29A;CG1572;CG34382;CG5151;CG5953;Chd64;cnc;CrebA;Csk;Dg;Fas1;hid;insc;jvl;kuz;Lac;LIMK1;Lk6;luna;mbc;Paip2;par-1;pes;puc;Sap-r;shep;spin;Tm1;vari;Xrp1
5kbUpTx	cnc_top50	homer__NATGASTCABNN_Fosl2	3.42	0.142	cnc	*	kay (inferredBy_Orthology).	Jra (inferredBy_MotifSimilarity). cnc; mor (inferredBy_MotifSimilarity_n_Orthology).	16	492	Btk29A;bun;CG5151;Chd64;cnc;Fas1;hid;insc;Lac;luna;mbc;Mlc-c;puc;scb;shep;Xrp1
5kbUpTx	cnc_top50	homer__AWWNTGCTGAGTCAT_Bach1	3.38	0.141	cnc	**	cnc (inferredBy_Orthology).	maf-S (inferredBy_MotifSimilarity). tj (inferredBy_MotifSimilarity_n_Orthology).	37	3848	baz;Btk29A;bun;CG10939;CG1572;CG34382;CG5151;CG5953;Chd64;cnc;CrebA;Csk;Dg;Fas1;hid;insc;jvl;Klp98A;kuz;Lac;Lamp1;LIMK1;Lk6;luna;mbc;Paip2;par-1;pes;puc;RNaseX25;Sap-r;scb;shep;spin;Tm1;vari;Xrp1
5kbUpTx	cnc_top50	factorbook__NFE2	3.28	0.139	cnc	**	cnc (inferredBy_Orthology).	maf-S (inferredBy_MotifSimilarity). Jra; kay; tj (inferredBy_MotifSimilarity_n_Orthology).	28	2171	baz;Btk29A;CG10939;CG5151;CG5953;Chd64;cnc;CrebA;Csk;Dg;Fas1;hid;insc;kuz;Lac;Lamp1;luna;mbc;Paip2;par-1;pes;puc;Sap-r;scb;shep;spin;Tm1;Xrp1
5kbUpTx	cnc_top50	transfac_public__M00037	3.26	0.138	cnc	**	cnc; maf-S (inferredBy_Orthology).	Jra; ewg; kay; tj (inferredBy_MotifSimilarity_n_Orthology).	12	441	Btk29A;CG5151;Chd64;cnc;hid;insc;Lac;luna;Paip2;puc;Tm1;vari
5kbUpTx	cnc_top50	jaspar__MA0501.1	3.23	0.137	cnc	**	cnc (inferredBy_Orthology).	maf-S (inferredBy_MotifSimilarity). tj (inferredBy_MotifSimilarity_n_Orthology).	18	885	baz;Btk29A;CG5151;CG5953;Chd64;cnc;hid;insc;kuz;Lac;luna;mbc;Paip2;pes;puc;Sap-r;Tm1;Xrp1
5kbUpTx	cnc_top50	cisbp__M4629	3.2	0.137	cnc	**	cnc (inferredBy_Orthology).	maf-S (inferredBy_MotifSimilarity). tj (inferredBy_MotifSimilarity_n_Orthology).	23	1428	baz;Btk29A;CG5151;CG5953;Chd64;cnc;CrebA;Dg;hid;insc;kuz;Lac;luna;mbc;Paip2;par-1;pes;puc;Sap-r;shep;spin;Tm1;Xrp1
5kbUpTx	cnc_top50	cisbp__M4093	3.17	0.136	cnc	*		tj (inferredBy_MotifSimilarity). cnc; maf-S (inferredBy_MotifSimilarity_n_Orthology).	13	612	Btk29A;Chd64;cnc;CrebA;hid;jvl;kuz;Lac;luna;mbc;pes;puc;shep
5kbUpTx	cnc_top50	transfac_public__M00035	3.13	0.135	cnc	*		tj (inferredBy_MotifSimilarity). cnc; maf-S (inferredBy_MotifSimilarity_n_Orthology).	9	266	cnc;hid;jvl;kuz;luna;mbc;pes;puc;shep
5kbUpTx	cnc_top50	swissregulon__hs__BACH2.p2	3.13	0.135	cnc	**	cnc (inferredBy_Orthology).	Jra; kay; mor (inferredBy_MotifSimilarity_n_Orthology).	26	1460	baz;Btk29A;bun;CG5151;CG5953;Chd64;cnc;CrebA;Fas1;hid;insc;jvl;Klp98A;kuz;Lac;luna;mbc;Mlc-c;pes;puc;scb;shep;spin;Tm1;vari;Xrp1
5kbUpTx	cnc_top50	cisbp__M3617	3.11	0.134	cnc	**	cnc (inferredBy_Orthology).	Jra; ewg; kay; maf-S; tj (inferredBy_MotifSimilarity_n_Orthology).	10	360	Btk29A;CG5151;Chd64;cnc;Lac;luna;Paip2;puc;Tm1;vari
5kbUpTx	cnc_top50perTarget	swissregulon__sacCer__GCN4	5.55	0.0667	cnc	*		Jra; kay (inferredBy_MotifSimilarity). NFAT; cnc (inferredBy_MotifSimilarity_n_Orthology).	447	2740	18w;AGO1;AGO2;Akap200;ALiX;aop;aPKC;Arf51F;Arp2;Arpc2;Asap;Atg17;Atg4b;Atg8a;Atpalpha;B4;bark;baz;Best1;blow;Bmcp;Bsg;Btk29A;bun;CAP;Caper;capt;CenG1A;cer;cert;CG10077;CG10082;CG10098;CG10126;CG10283;CG10337;CG10413;CG10527;CG10874;CG10939;CG11050;CG11426;CG1146;CG11486;CG11537;CG12004;CG12012;CG12054;CG12065;CG12730;CG13124;CG13255;CG13907;CG13917;CG14073;CG15012;CG15111;CG15209;CG15211;CG15861;…
5kbUpTx	cnc_top50perTarget	scertf__spivak.GCN4	5.53	0.0666	cnc	*		Jra; kay (inferredBy_MotifSimilarity). NFAT; cnc (inferredBy_MotifSimilarity_n_Orthology).	459	2900	18w;Act42A;AGO1;AGO2;Akap200;ALiX;aop;aPKC;Arp2;Arpc2;Atg17;Atg4b;Atpalpha;B4;bark;baz;Best1;betaTub97EF;blow;Bmcp;brk;Bsg;Btk29A;bun;CAP;Caper;capt;Cbl;CenG1A;cer;cert;CG10077;CG10082;CG10098;CG10126;CG10283;CG10337;CG10353;CG10413;CG10527;CG10939;CG1105;CG11050;CG11426;CG1146;CG12004;CG12012;CG12054;CG12065;CG12655;CG12730;CG12746;CG13124;CG13255;CG13698;CG13893;CG13907;CG13917;CG14073;CG14478;…
5kbUpTx	cnc_top50perTarget	transfac_pro__M04693	5.5	0.0664	cnc	*	kay (inferredBy_Orthology).	Jra (inferredBy_MotifSimilarity). NFAT; cnc (inferredBy_MotifSimilarity_n_Orthology).	488	3127	18w;AGO1;AGO2;Akap200;ALiX;aop;aPKC;Arpc2;Arpc4;ASPP;Atpalpha;Atx2;B4;bark;baz;Best1;blow;brk;Bsg;Btk29A;bun;CalpB;CAP;Caper;capt;Cbl;CenG1A;cer;cert;CG10082;CG10098;CG10103;CG10126;CG10283;CG10337;CG10376;CG10413;CG10527;CG10874;CG10939;CG11050;CG11426;CG1146;CG11791;CG12004;CG12012;CG12054;CG12065;CG12163;CG12655;CG12730;CG12746;CG13124;CG13252;CG13384;CG13698;CG13868;CG13887;CG13893;CG13907;CG…
5kbUpTx	cnc_top50perTarget	cisbp__M4684	5.48	0.0662	cnc	*		Jra; kay (inferredBy_MotifSimilarity). cnc (inferredBy_MotifSimilarity_n_Orthology).	456	2738	18w;AGO1;AGO2;Akap200;ALiX;aop;aPKC;Arf51F;Arpc2;Arpc4;Atpalpha;Atx2;B4;bark;baz;Best1;blow;brk;Bsg;Btk29A;bun;CalpB;CAP;Caper;capt;Cbl;CenG1A;cert;CG10082;CG10098;CG10103;CG10126;CG10283;CG10337;CG10376;CG10413;CG10527;CG10874;CG10939;CG11050;CG11426;CG1146;CG12004;CG12012;CG12054;CG12065;CG12163;CG12655;CG12730;CG12746;CG13124;CG13698;CG13784;CG13887;CG13907;CG13917;CG13921;CG15012;CG15098;CG15…
5kbUpTx	cnc_top50perTarget	taipale__NFE2_DBD_NATGASTCATN	5.35	0.0653	cnc	**	cnc (inferredBy_Orthology).	Jra; kay (inferredBy_MotifSimilarity_n_Orthology).	534	3460	18w;Ada2b;AdipoR;AGO2;Akap200;ALiX;AMPdeam;aop;aPKC;Arf51F;Arpc2;Asap;ASPP;Atet;Atg17;Atg18a;Atpalpha;Atx2;B4;Baldspot;bark;baz;be;Best1;blow;Bsg;Btk29A;bun;CAP;Caper;capt;Cbl;Cdc42;CenG1A;cert;CG10082;CG10089;CG10098;CG10103;CG10126;CG10283;CG10337;CG10353;CG10376;CG10527;CG10916;CG10939;CG1105;CG11050;CG11125;CG11426;CG1146;CG11486;CG11537;CG11791;CG12004;CG12012;CG12054;CG12065;CG12655;CG12730…
5kbUpTx	cnc_top50perTarget	hocomoco__FOSL2_HUMAN.H10MO.A	5.34	0.0653	cnc	*	kay (inferredBy_Orthology).	Jra; cnc; mor (inferredBy_MotifSimilarity_n_Orthology).	633	4447	18w;Act42A;Ada2b;AdipoR;AGO1;AGO2;Akap200;ALiX;alpha-Est7;AMPdeam;aop;Apc;aPKC;Arp2;Arpc2;Arpc4;Asap;ASPP;Atg17;Atg18a;Atg8a;atl;Atpalpha;ATPCL;Atx2;B4;Baldspot;bark;baz;be;Best1;betaggt-I;betaTub97EF;blow;Bmcp;brk;Bruce;Bsg;Btk29A;bun;CalpA;CalpB;CAP;Caper;capt;cathD;Cbl;CenB1A;CenG1A;cer;cert;CG10077;CG10082;CG10098;CG10103;CG10126;CG10283;CG10337;CG10353;CG10376;CG10413;CG10527;CG10874;CG10916…
5kbUpTx	cnc_top50perTarget	taipale__JDP2_full_ATGASTCAT	5.28	0.0649	cnc	*		kay (inferredBy_MotifSimilarity). Jra; cnc (inferredBy_MotifSimilarity_n_Orthology).	627	4664	18w;Acsl;Act42A;Ada2b;Adgf-A;AdipoR;AGO1;AGO2;Akap200;ALiX;alpha-Est7;AMPdeam;aop;aPKC;Arf51F;Arp2;Arpc2;Arpc4;Asap;ASPP;Atet;Atg17;Atg18a;Atg4b;Atg8a;Atpalpha;Atx2;B4;Baldspot;bark;baz;Best1;betaTub97EF;blow;brk;Bsg;Btk29A;bun;C3G;CalpB;CAP;Caper;capt;Cbl;Cdc42;CenG1A;cert;CG10077;CG10082;CG10089;CG10098;CG10103;CG10126;CG10283;CG10337;CG10353;CG10376;CG10413;CG10527;CG10874;CG10916;CG10939;CG11…
5kbUpTx	cnc_top50perTarget	cisbp__M4570	5.24	0.0646	cnc	*	Jra (inferredBy_Orthology).	cnc; kay; mor (inferredBy_MotifSimilarity_n_Orthology).	655	4947	18w;Act42A;Ada2b;AGO1;AGO2;Akap200;ALiX;alpha-Est7;AMPdeam;AnxB10;aop;Apc;aPKC;Aps;Arf51F;Arp2;Arpc2;Asap;ASPP;Asx;Atg18a;atl;Atpalpha;Atx2;B4;Baldspot;bark;baz;be;Best1;betaggt-I;betaTub97EF;blow;brk;Bsg;Btk29A;bun;C3G;CalpA;CalpB;CAP;Caper;capt;Cbl;Cdc42;CenB1A;CenG1A;cer;cert;CG10082;CG10098;CG10103;CG10126;CG10283;CG10337;CG10353;CG10376;CG10413;CG10527;CG10874;CG10916;CG10939;CG11050;CG11125…
5kbUpTx	cnc_top50perTarget	taipale_tf_pairs__BACH1_ATGACTCAT_HT	5.23	0.0645	cnc	**	cnc (inferredBy_Orthology).		572	3927	18w;Acsl;Act42A;Ada2b;Adgf-A;AdipoR;AGO1;AGO2;Akap200;ALiX;alpha-Est7;aop;Apc;aPKC;Arf51F;Arp2;Arpc2;Arpc4;Asap;ASPP;Atg17;Atg18a;Atg4b;Atg8a;atl;Atpalpha;Atx2;B4;bark;baz;Best1;betaggt-I;betaTub97EF;blow;Bmcp;brk;Bsg;Btk29A;bun;C3G;CalpA;CalpB;CAP;Caper;capt;Cbl;Cdc42;CenB1A;CenG1A;cer;cert;CG10077;CG10082;CG10098;CG10126;CG10283;CG10337;CG10376;CG10413;CG10527;CG10874;CG10939;CG1105;CG11050;CG1…
5kbUpTx	cnc_top50perTarget	taipale__JDP2_DBD_ATGASTCAT	5.23	0.0645	cnc	*		Jra; kay (inferredBy_MotifSimilarity). cnc (inferredBy_MotifSimilarity_n_Orthology).	639	4952	18w;Act42A;Ada2b;Adgf-A;AdipoR;AGO1;AGO2;Akap200;ALiX;alpha-Est7;AMPdeam;aop;Apc;aPKC;Arf51F;Arp2;Arpc2;Arpc4;Asap;ASPP;Atet;Atg17;Atg18a;Atg4b;Atg8a;Atpalpha;Atx2;B4;Baldspot;bark;baz;be;Best1;betaggt-I;betaTub97EF;blow;brk;Bsg;Btk29A;bun;C3G;CalpB;CAP;Caper;capt;Cbl;Cdc42;CenG1A;cer;cert;CG10082;CG10098;CG10103;CG10126;CG10283;CG10337;CG10353;CG10376;CG10413;CG10527;CG10874;CG10916;CG10939;CG11…
5kbUpTx	cnc_top50perTarget	cisbp__M5589	5.21	0.0644	cnc	*		kay (inferredBy_MotifSimilarity). Jra; cnc (inferredBy_MotifSimilarity_n_Orthology).	635	4977	18w;Acsl;Act42A;Ada2b;Adgf-A;AdipoR;AGO1;AGO2;Akap200;ALiX;alpha-Est7;aop;Apc;aPKC;Aps;Arf51F;Arp2;Arpc2;Arpc4;Asap;ASPP;Atet;Atg17;Atg18a;Atg4b;Atg8a;Atpalpha;Atx2;B4;Baldspot;bark;baz;be;Best1;betaTub97EF;blow;brk;Bsg;Btk29A;bun;CalpB;CAP;Caper;capt;Cbl;Cdc42;CenG1A;cer;cert;CG10077;CG10082;CG10089;CG10098;CG10103;CG10126;CG10283;CG10337;CG10353;CG10376;CG10413;CG10527;CG10874;CG10916;CG10939;C…
5kbUpTx	cnc_top50perTarget	cisbp__M5587	5.16	0.064	cnc	*		Jra; kay (inferredBy_MotifSimilarity). cnc (inferredBy_MotifSimilarity_n_Orthology).	618	4811	18w;Act42A;Ada2b;Adgf-A;AdipoR;AGO1;AGO2;Akap200;ALiX;alpha-Est7;aop;Apc;aPKC;Arf51F;Arpc2;Arpc4;Asap;ASPP;Atet;Atg17;Atg18a;Atg4b;Atg8a;Atpalpha;Atx2;B4;Baldspot;bark;baz;be;Best1;betaggt-I;betaTub97EF;blow;brk;Bsg;Btk29A;bun;CalpB;CAP;Caper;capt;Cbl;Cdc42;CenG1A;cer;cert;CG10077;CG10082;CG10089;CG10098;CG10103;CG10126;CG10283;CG10337;CG10353;CG10376;CG10413;CG10527;CG10874;CG10916;CG10939;CG110…
5kbUpTx	cnc_top50perTarget	cisbp__M5659	5.16	0.064	cnc	**	cnc (inferredBy_Orthology).	Jra; kay (inferredBy_MotifSimilarity_n_Orthology).	638	4965	18w;Acsl;Act42A;Ada2b;AdipoR;AGO1;AGO2;Akap200;ALiX;alpha-Est7;AMPdeam;Ank;AnxB10;aop;aPKC;Aps;Arf51F;Arp2;Arpc2;Asap;Asph;ASPP;Atet;Atg17;Atg18a;Atg4b;Atpalpha;Atx2;B4;Baldspot;bark;baz;be;Best1;betaTub97EF;blow;brk;Bsg;Btk29A;bun;CalpB;CAP;Caper;capt;Cbl;Cdc42;ced-6;CenG1A;cert;CG10082;CG10089;CG10098;CG10103;CG10126;CG10283;CG10337;CG10353;CG10376;CG10413;CG10465;CG10527;CG10874;CG10916;CG1093…
5kbUpTx	cnc_top50perTarget	cisbp__M4623	5.15	0.0639	cnc	*	Jra (inferredBy_Orthology).	kay (inferredBy_MotifSimilarity). cnc (inferredBy_MotifSimilarity_n_Orthology).	617	4453	18w;Act42A;Ada2b;AGO1;AGO2;Akap200;ALiX;alpha-Est7;AMPdeam;AnxB10;aop;Apc;aPKC;Arf51F;Arp2;Arpc2;Asap;ASPP;Atg17;Atg18a;Atg4b;Atg8a;atl;Atpalpha;Atx2;B4;Baldspot;bark;baz;be;Best1;betaggt-I;betaTub97EF;blow;Bmcp;brk;Bsg;Btk29A;bun;C3G;CalpB;CAP;Caper;capt;Cbl;Cdc42;CenB1A;CenG1A;cer;cert;CG10082;CG10098;CG10103;CG10126;CG10283;CG10337;CG10353;CG10376;CG10413;CG10527;CG10874;CG10916;CG10939;CG1105…
5kbUpTx	cnc_top50perTarget	taipale__Jdp2_DBD_ATGASTCAT_repr	5.12	0.0638	cnc	*		kay (inferredBy_MotifSimilarity). Jra; cnc (inferredBy_MotifSimilarity_n_Orthology).	666	4963	18w;Act42A;Ada2b;Adar;Adgf-A;AdipoR;AGO1;AGO2;Akap200;ALiX;alpha-Est7;AMPdeam;Ank;aop;aPKC;Aps;Arf51F;Arp2;Arpc2;Arpc4;Asap;Asph;ASPP;Atet;Atg17;Atg18a;Atg4b;Atg8a;Atpalpha;Atx2;B4;Baldspot;bark;baz;bchs;be;Best1;betaTub97EF;blow;brk;Bsg;Btk29A;bun;C3G;CalpB;CAP;Caper;capt;Cbl;Cdc42;CenG1A;cer;cert;CG10082;CG10089;CG10098;CG10103;CG10126;CG10283;CG10337;CG10353;CG10376;CG10413;CG10527;CG10874;CG1…
5kbUpTx	cnc_top50perTarget	hocomoco__FOS_HUMAN.H10MO.A	5.12	0.0637	cnc	*	kay (inferredBy_Orthology).	Jra (inferredBy_MotifSimilarity). cnc; mor (inferredBy_MotifSimilarity_n_Orthology).	654	4762	18w;Acsl;Act42A;Ada2b;AdipoR;AGO1;AGO2;Akap200;ALiX;alpha-Est7;AMPdeam;aop;Apc;aPKC;Aps;Arf51F;Arp2;Arpc2;Arpc4;Asap;ASPP;Atg17;Atg18a;Atg4b;Atg8a;Atg9;atl;Atpalpha;ATPCL;Atx2;B4;Baldspot;bark;baz;be;Best1;betaggt-I;betaTub97EF;blow;Bmcp;brk;Bruce;Bsg;Btk29A;bun;C3G;CalpA;CalpB;CAP;Caper;capt;Cbl;Cdc42;CenB1A;CenG1A;cer;cert;CG10082;CG10098;CG10103;CG10126;CG10283;CG10337;CG10353;CG10376;CG10413;…
5kbUpTx	cnc_top50perTarget	cisbp__M4607	5.09	0.0635	cnc	*	kay (inferredBy_Orthology).	Jra (inferredBy_MotifSimilarity). cnc; maf-S (inferredBy_MotifSimilarity_n_Orthology).	586	4230	18w;Act42A;Ada2b;Adgf-A;AGO1;AGO2;Akap200;ALiX;alpha-Est7;AMPdeam;AnxB10;aop;aPKC;Arf51F;Arp2;Arpc2;Asap;ASPP;Atg17;Atg18a;atl;Atpalpha;Atx2;B4;Baldspot;bark;baz;Best1;betaggt-I;betaTub97EF;blow;brk;Bsg;Btk29A;bun;C3G;CalpB;CAP;Caper;capt;Cbl;Cdc42;CenB1A;CenG1A;cer;cert;CG10082;CG10098;CG10103;CG10126;CG10283;CG10337;CG10353;CG10376;CG10413;CG10527;CG10874;CG10916;CG10939;CG11050;CG11125;CG11357…
5kbUpTx	cnc_top50perTarget	cisbp__M6038	5.07	0.0634	cnc	*		kay (inferredBy_MotifSimilarity). Jra; cnc (inferredBy_MotifSimilarity_n_Orthology).	624	4630	18w;Act42A;Ada2b;Adar;Adgf-A;AdipoR;AGO1;AGO2;Akap200;ALiX;alpha-Est7;AMPdeam;aop;aPKC;Arf51F;Arp2;Arpc2;Arpc4;Asap;Asph;ASPP;Atet;Atg17;Atg18a;Atg4b;Atg8a;Atpalpha;Atx2;B4;Baldspot;bark;baz;bchs;be;Best1;betaggt-I;betaTub97EF;blow;Bsg;Btk29A;bun;CalpB;CAP;Caper;capt;Cbl;Cdc42;CenB1A;CenG1A;cert;CG10082;CG10089;CG10098;CG10103;CG10126;CG10283;CG10337;CG10353;CG10376;CG10413;CG10527;CG10874;CG1091…
5kbUpTx	cnc_top50perTarget	homer__GATGACTCATCN_Jun-AP1	4.98	0.0627	cnc	*	Jra (inferredBy_Orthology).	kay (inferredBy_MotifSimilarity). cnc; mor (inferredBy_MotifSimilarity_n_Orthology).	624	4447	18w;Acsl;Act42A;Ada2b;AGO1;AGO2;Akap200;ALiX;AMPdeam;aop;Apc;aPKC;Arf51F;Arp2;Arpc2;Arpc4;ASPP;Atg17;Atg4b;atl;Atpalpha;Atx2;B4;Baldspot;bark;baz;be;Best1;betaggt-I;betaTub97EF;blow;brk;Bsg;Btk29A;bun;CalpB;CAP;Caper;capt;Cbl;Cdc42;CenB1A;CenG1A;cer;cert;CG10082;CG10089;CG10098;CG10103;CG10126;CG10283;CG10337;CG10353;CG10376;CG10413;CG10527;CG10874;CG10916;CG10939;CG1105;CG11050;CG11125;CG11426;C…
5kbUpTx	cnc_top50perTarget	hocomoco__FOSB_HUMAN.H10MO.C	4.95	0.0626	cnc	*	kay (inferredBy_Orthology).	Jra (inferredBy_MotifSimilarity). cnc; mor (inferredBy_MotifSimilarity_n_Orthology).	673	4946	18w;Acsl;Act42A;Ada2b;AdipoR;AGO1;AGO2;Akap200;ALiX;alpha-Est7;AMPdeam;aop;AP-1sigma;Apc;aPKC;Arf51F;Arp2;Arpc2;Arpc4;Asap;Asph;ASPP;Atg17;Atg4b;Atg9;atl;Atpalpha;ATPCL;Atx2;B4;Baldspot;bark;baz;bchs;be;Best1;betaggt-I;betaTub97EF;blow;Bmcp;brk;Bsg;Btk29A;bun;CalpA;CalpB;CAP;Caper;capt;cathD;Cbl;Cdc42;ced-6;CenB1A;CenG1A;cer;cert;CG10077;CG10082;CG10089;CG10098;CG10103;CG10126;CG10283;CG10337;CG1…
5kbUpTx	cnc_top50perTarget	hocomoco__JUND_HUMAN.H10MO.A	4.93	0.0624	cnc	*	Jra (inferredBy_Orthology).	kay (inferredBy_MotifSimilarity). cnc (inferredBy_MotifSimilarity_n_Orthology).	458	2695	Act42A;Ada2b;AGO1;AGO2;Akap200;ALiX;aop;Arf51F;Arp2;Arpc2;Arpc4;Atg4b;Atpalpha;Atx2;B4;bark;baz;Best1;betaggt-I;betaTub97EF;blow;brk;Bsg;Btk29A;bun;CAP;Caper;capt;Cbl;CenB1A;CenG1A;cer;cert;CG10082;CG10098;CG10103;CG10126;CG10283;CG10337;CG10376;CG10413;CG10527;CG10874;CG10939;CG11050;CG11125;CG11426;CG1146;CG12004;CG12012;CG12054;CG12065;CG12163;CG12746;CG13124;CG13252;CG13384;CG13698;CG13784;CG…
5kbUpTx	cnc_top50perTarget	homer__NNATGASTCATH_Fra1	4.89	0.0621	cnc	*		Jra; kay (inferredBy_MotifSimilarity). cnc; mor (inferredBy_MotifSimilarity_n_Orthology).	503	3101	18w;Act42A;AGO1;AGO2;Akap200;ALiX;aop;Apc;aPKC;Arf51F;Arp2;Arpc2;Atg17;Atg4b;atl;Atpalpha;Atx2;B4;Baldspot;bark;baz;Best1;betaggt-I;betaTub97EF;blow;brk;Bsg;Btk29A;bun;CalpB;CAP;Caper;capt;Cbl;CenG1A;cert;CG10082;CG10098;CG10126;CG10283;CG10337;CG10376;CG10413;CG10527;CG10916;CG10939;CG1105;CG11050;CG11125;CG11426;CG1146;CG12004;CG12012;CG12054;CG12065;CG12163;CG12746;CG13124;CG13252;CG13255;CG13…
5kbUpTx	cnc_top50perTarget	yetfasco__YER064C_2094	4.84	0.0618	cnc	*		Jra; kay (inferredBy_MotifSimilarity). cnc (inferredBy_MotifSimilarity_n_Orthology).	653	4813	18w;Act42A;Ada2b;AdipoR;AGO1;AGO2;Akap200;ALiX;alpha-Est7;AMPdeam;aop;AP-1sigma;aPKC;Aps;Arf51F;Arp2;Arpc2;Arpc4;Asap;Asph;ASPP;Atet;Atg17;Atg18a;Atg4b;Atg8a;atl;Atpalpha;B4;Baldspot;bark;baz;bchs;Best1;betaggt-I;betaTub97EF;blow;Bmcp;brk;Bsg;Btk29A;bun;C3G;CalpB;CAP;Caper;capt;Cbl;cdc14;Cdc42;CenG1A;cer;cert;CG10077;CG10082;CG10089;CG10098;CG10103;CG10126;CG10283;CG10337;CG10353;CG10376;CG10413;…
5kbUpTx	cnc_top50perTarget	cisbp__M4608	4.78	0.0614	cnc	*	Jra (inferredBy_Orthology).	kay (inferredBy_MotifSimilarity). cnc (inferredBy_MotifSimilarity_n_Orthology).	544	3536	18w;Act42A;Ada2b;AGO1;AGO2;Akap200;ALiX;alpha-Est7;aop;Arf51F;Arpc2;Arpc4;Asap;Atg17;Atpalpha;ATPCL;Atx2;B4;bark;baz;Best1;betaggt-I;betaTub97EF;blow;Bmcp;brk;Bsg;Btk29A;bun;CalpB;CAP;Caper;capt;Cbl;CenB1A;CenG1A;cer;cert;CG10082;CG10098;CG10103;CG10126;CG10283;CG10337;CG10353;CG10376;CG10413;CG10527;CG10874;CG10916;CG10939;CG11050;CG11125;CG11426;CG1146;CG11486;CG11537;CG11753;CG12004;CG12012;CG…
5kbUpTx	cnc_top50perTarget	cisbp__M6318	4.72	0.061	cnc	*	Jra (inferredBy_Orthology).	kay (inferredBy_MotifSimilarity). cnc (inferredBy_MotifSimilarity_n_Orthology).	471	2870	18w;Act42A;Ada2b;AGO1;AGO2;Akap200;ALiX;aop;Arf51F;Arp2;Arpc2;Atg4b;Atpalpha;Atx2;B4;bark;baz;Best1;betaggt-I;betaTub97EF;blow;brk;Bsg;Btk29A;bun;CAP;Caper;capt;Cbl;CenB1A;CenG1A;cer;cert;CG10082;CG10098;CG10103;CG10126;CG10283;CG10337;CG10376;CG10413;CG10527;CG10874;CG10939;CG11050;CG11125;CG11426;CG1146;CG12004;CG12012;CG12054;CG12065;CG12163;CG12655;CG12730;CG12746;CG13124;CG13252;CG13255;CG13…
5kbUpTx	cnc_top50perTarget	hocomoco__JUNB_HUMAN.H10MO.C	4.68	0.0607	cnc	*	Jra (inferredBy_Orthology).	cnc; kay; mor (inferredBy_MotifSimilarity_n_Orthology).	392	2192	18w;Act42A;AGO2;Akap200;ALiX;aop;Arpc2;ASPP;Atpalpha;B4;bark;baz;Best1;betaggt-I;betaTub97EF;blow;Bsg;Btk29A;bun;CAP;Caper;capt;Cbl;CenG1A;cer;cert;CG10082;CG10098;CG10126;CG10283;CG10337;CG10376;CG10413;CG10527;CG11050;CG11125;CG11426;CG1146;CG12004;CG12012;CG12054;CG12065;CG12655;CG12730;CG13124;CG13255;CG13384;CG13698;CG13893;CG13907;CG13917;CG15012;CG15098;CG15211;CG15861;CG1677;CG16791;CG175…
5kbUpTx	cnc_top50perTarget	cisbp__M4526	4.66	0.0606	cnc	*	mor (inferredBy_Orthology).	Jra; cnc; ewg; kay; maf-S; tj (inferredBy_MotifSimilarity_n_Orthology).	655	4897	18w;Act42A;Ada2b;AGO1;AGO2;Akap200;ALiX;alpha-Est7;AMPdeam;AnxB10;aop;AP-1sigma;Apc;aPKC;Arf51F;Arp2;Arpc2;Arpc4;Asph;ASPP;Atg17;Atg4b;atl;Atpalpha;ATPCL;Atx2;B4;Baldspot;bark;baz;be;Best1;betaggt-I;betaTub97EF;blow;brk;Bsg;bsk;Btk29A;bun;C3G;CalpB;CAP;Caper;capt;cathD;Cbl;Cdc42;ced-6;CenB1A;CenG1A;cer;cert;CG10082;CG10098;CG10103;CG10126;CG10283;CG10337;CG10353;CG10376;CG10413;CG10527;CG10543;CG…
5kbUpTx	cnc_top50perTarget	hocomoco__JUN_HUMAN.H10MO.A	4.63	0.0603	cnc	*	Jra (inferredBy_Orthology).	kay (inferredBy_MotifSimilarity). cnc; mor (inferredBy_MotifSimilarity_n_Orthology).	518	3323	18w;Acsl;Act42A;Ada2b;AGO1;AGO2;Akap200;ALiX;aop;Apc;aPKC;Arp2;Arpc2;Arpc4;ASPP;atl;Atpalpha;Atx2;B4;bark;baz;Best1;betaggt-I;betaTub97EF;blow;brk;Bsg;Btk29A;bun;CalpA;CalpB;CAP;Caper;capt;Cbl;CenB1A;CenG1A;cer;cert;CG10082;CG10089;CG10098;CG10103;CG10126;CG10283;CG10337;CG10376;CG10413;CG10527;CG10874;CG10916;CG10939;CG11050;CG11125;CG11426;CG1146;CG11753;CG12004;CG12012;CG12054;CG12065;CG12163;…
5kbUpTx	cnc_top50perTarget	hocomoco__FOSL2_MOUSE.H10MO.A	4.63	0.0603	cnc	*	kay (inferredBy_Orthology).	Jra; cnc; mor (inferredBy_MotifSimilarity_n_Orthology).	613	4543	18w;Act42A;Ada2b;Adgf-A;AdipoR;AGO1;AGO2;Akap200;ALiX;AMPdeam;AnxB10;aop;Apc;aPKC;Arf51F;Arp2;Arpc2;Arpc4;ASPP;Atg17;Atg4b;Atg9;atl;Atpalpha;Atx2;B4;Baldspot;bark;baz;be;Best1;betaggt-I;betaTub97EF;blow;brk;Bsg;Btk29A;bun;CalpB;CAP;Caper;capt;Cbl;Cdc42;CenB1A;CenG1A;cer;cert;CG10082;CG10089;CG10098;CG10103;CG10126;CG10283;CG10337;CG10353;CG10376;CG10413;CG10527;CG10874;CG10916;CG10939;CG1105;CG11…
5kbUpTx	cnc_top50perTarget	cisbp__M2979	4.62	0.0603	cnc	**	cnc (inferredBy_Orthology).	Jra (inferredBy_MotifSimilarity_n_Orthology).	510	3541	18w;Act42A;AGO1;AGO2;Akap200;ALiX;alpha-Est7;AMPdeam;AnxB10;aop;aPKC;Aps;Arf51F;Arp2;Arpc2;Asap;ASPP;Atet;Atg18a;atl;Atpalpha;Atx2;B4;Baldspot;bark;baz;Best1;betaggt-I;betaTub97EF;blow;Bsg;Btk29A;bun;CAP;Caper;capt;Cdc42;CenG1A;cert;CG10082;CG10098;CG10126;CG10283;CG10337;CG10376;CG10527;CG10874;CG10916;CG10939;CG1105;CG11125;CG11426;CG1146;CG11486;CG11537;CG11791;CG12004;CG12012;CG12054;CG12655;…
5kbUpTx	cnc_top50perTarget	cisbp__M6230	4.6	0.0601	cnc	*	kay (inferredBy_Orthology).	Jra; cnc; mor (inferredBy_MotifSimilarity_n_Orthology).	642	4962	18w;Acsl;Act42A;Ada2b;Adar;Adgf-A;AdipoR;AGO1;AGO2;Akap200;ALiX;AMPdeam;AnxB10;aop;Apc;aPKC;Arf51F;Arp2;Arpc2;Arpc4;ASPP;Atg17;Atg18a;Atg4b;Atg9;atl;Atpalpha;Atx2;B4;Baldspot;bark;baz;be;Best1;betaggt-I;betaTub97EF;blow;brk;Bsg;Btk29A;bun;CalpB;CAP;Caper;capt;Cbl;Cdc42;CenB1A;CenG1A;cer;cert;CG10082;CG10089;CG10098;CG10103;CG10126;CG10283;CG10337;CG10353;CG10376;CG10413;CG10527;CG10874;CG10916;CG…
5kbUpTx	cnc_top50perTarget	cisbp__M4506	4.53	0.0596	cnc	*	Jra (inferredBy_Orthology).	kay (inferredBy_MotifSimilarity). cnc; mor (inferredBy_MotifSimilarity_n_Orthology).	559	3820	18w;Act42A;Ada2b;AGO1;AGO2;Akap200;ALiX;AMPdeam;AnxB10;aop;Arf51F;Arp2;Arpc2;atl;Atpalpha;Atx2;B4;Baldspot;bark;baz;be;Best1;betaTub97EF;blow;brk;Bsg;Btk29A;bun;CalpB;CAP;Caper;capt;Cbl;cdc14;CenB1A;CenG1A;cer;cert;CG10082;CG10089;CG10098;CG10103;CG10126;CG10283;CG10337;CG10353;CG10376;CG10413;CG10527;CG10874;CG10916;CG10939;CG11050;CG11125;CG11357;CG11426;CG1146;CG11753;CG12004;CG12012;CG12054;C…
5kbUpTx	cnc_top50perTarget	homer__ATGACTCATC_AP-1	4.51	0.0595	cnc	*	Jra (inferredBy_Orthology).	kay (inferredBy_MotifSimilarity). cnc; maf-S; mor (inferredBy_MotifSimilarity_n_Orthology).	628	4552	18w;Acsl;Act42A;Ada2b;AGO1;AGO2;Akap200;ALiX;alpha-Est7;AMPdeam;aop;Apc;aPKC;Arf51F;Arp2;Arpc2;Arpc4;Asap;Asph;ASPP;Atg4b;atl;Atpalpha;ATPCL;Atx2;B4;Baldspot;bark;baz;be;Best1;betaggt-I;betaTub97EF;blow;brk;Bsg;Btk29A;bun;CalpB;CAP;Caper;capt;cathD;Cbl;Cdc42;CenB1A;CenG1A;cer;cert;CG10082;CG10098;CG10103;CG10126;CG10283;CG10337;CG10353;CG10376;CG10413;CG10527;CG10874;CG10916;CG10939;CG11050;CG111…
5kbUpTx	cnc_top50perTarget	yetfasco__YEL009C_1363	4.42	0.0588	cnc	*		Jra; kay (inferredBy_MotifSimilarity). NFAT; cnc; maf-S; tj (inferredBy_MotifSimilarity_n_Orthology).	438	2704	18w;Acsl;Act42A;AGO1;AGO2;Akap200;ALiX;aop;aPKC;Arf51F;Arp2;Arpc2;ASPP;Atg17;Atg4b;atl;Atpalpha;B4;Baldspot;bark;baz;Best1;betaggt-I;betaTub97EF;blow;brk;Bsg;Btk29A;bun;CalpA;CAP;Caper;capt;Cdc42;CenB1A;CenG1A;cer;cert;CG10089;CG10098;CG10126;CG10283;CG10337;CG10413;CG10527;CG10939;CG11050;CG11125;CG11426;CG1146;CG11486;CG11753;CG12004;CG12012;CG12054;CG12065;CG12655;CG12730;CG13252;CG13255;CG133…
5kbUpTx	cnc_top50perTarget	yetfasco__YIL056W_2091	4.39	0.0587	cnc	*		Jra; kay (inferredBy_MotifSimilarity). cnc; mor (inferredBy_MotifSimilarity_n_Orthology).	345	1859	18w;Act42A;AGO2;Akap200;ALiX;aop;Arpc2;Atpalpha;B4;bark;baz;Best1;betaTub97EF;blow;brk;Btk29A;bun;CAP;Caper;capt;CenG1A;cer;cert;CG10098;CG10126;CG10283;CG10337;CG10527;CG11050;CG11426;CG12004;CG12012;CG12054;CG12065;CG12655;CG12730;CG13384;CG13784;CG13893;CG13907;CG13917;CG14073;CG15012;CG15861;CG1677;CG16791;CG17019;CG17574;CG17746;CG17834;CG18659;CG1890;CG1943;CG2938;CG2991;CG30015;CG30423;CG3…
5kbUpTx	cnc_top50perTarget	cisbp__M6319	4.35	0.0584	cnc	*	Jra (inferredBy_Orthology).	kay (inferredBy_MotifSimilarity). cnc; mor (inferredBy_MotifSimilarity_n_Orthology).	529	3472	18w;Acsl;Act42A;Ada2b;AGO1;AGO2;Akap200;ALiX;aop;Apc;aPKC;Arp2;Arpc2;Arpc4;ASPP;atl;Atpalpha;Atx2;B4;bark;baz;Best1;betaggt-I;betaTub97EF;blow;brk;Bsg;Btk29A;bun;CalpA;CalpB;CAP;Caper;capt;Cbl;CenB1A;CenG1A;cer;cert;CG10082;CG10089;CG10098;CG10103;CG10126;CG10283;CG10337;CG10376;CG10413;CG10527;CG10874;CG10916;CG10939;CG11050;CG11125;CG11426;CG1146;CG11753;CG12004;CG12012;CG12054;CG12065;CG12163;…
5kbUpTx	cnc_top50perTarget	transfac_public__M00495	4.16	0.0571	cnc	**	cnc (inferredBy_Orthology).	Jra (inferredBy_MotifSimilarity_n_Orthology).	284	1520	18w;AGO1;AGO2;Akap200;ALiX;Arf51F;Arpc2;Atpalpha;B4;bark;baz;Best1;blow;Bsg;Btk29A;bun;CAP;Caper;CenG1A;cert;CG10098;CG10126;CG10283;CG10337;CG10376;CG11426;CG1146;CG12012;CG12054;CG12655;CG13698;CG15861;CG1677;CG16791;CG17574;CG17834;CG18659;CG1890;CG1943;CG2765;CG30015;CG30069;CG30456;CG31038;CG31324;CG31523;CG31637;CG32137;CG32365;CG32369;CG33229;CG33970;CG34417;CG3529;CG3770;CG4025;CG4101;CG4…
5kbUpTx	cnc_top50perTarget	transfac_public__M00490	3.87	0.0551	cnc	**	cnc (inferredBy_Orthology).	Jra; kay (inferredBy_MotifSimilarity_n_Orthology).	559	4214	18w;Acsl;Act42A;Ada2b;Adgf-A;AGO1;AGO2;Akap200;ALiX;aop;Aps;Arf51F;Arp2;Arpc2;ASPP;Asx;Atg17;Atg4b;atl;Atpalpha;Atx2;B4;Baldspot;bark;baz;bchs;Best1;betaTub97EF;blow;brk;Bsg;BtbVII;Btk29A;bun;CaMKI;CAP;Caper;capt;Cbl;Cdc42;CenG1A;cert;CG10082;CG10098;CG10126;CG10283;CG10337;CG10376;CG10527;CG10874;CG10916;CG1105;CG11125;CG11426;CG1146;CG11537;CG12012;CG12054;CG12655;CG12730;CG12746;CG13124;CG1325…
5kbUpTx	cnc_top50perTarget	cisbp__M2980	3.86	0.055	cnc	**	cnc (inferredBy_Orthology).	Jra; kay (inferredBy_MotifSimilarity_n_Orthology).	590	4592	18w;Acsl;Act42A;Ada2b;Adgf-A;AGO1;AGO2;Akap200;ALiX;AnxB10;aop;Aps;Arf51F;Arp2;Arpc2;ASPP;Asx;Atg17;Atg4b;atl;Atpalpha;Atx2;B4;Baldspot;bark;baz;bchs;Best1;betaTub97EF;blow;Bmcp;brk;Bsg;BtbVII;Btk29A;bun;CaMKI;CAP;Caper;capt;Cbl;Cdc42;CenG1A;cer;cert;CG10082;CG10098;CG10126;CG10283;CG10337;CG10376;CG10413;CG10527;CG10874;CG10916;CG1105;CG11125;CG11357;CG11426;CG1146;CG11537;CG12004;CG12012;CG1205…
5kbUpTx	cnc_top50perTarget	neph__UW.Motif.0001	3.79	0.0545	cnc	*		kay (inferredBy_MotifSimilarity). Jra; cnc (inferredBy_MotifSimilarity_n_Orthology).	439	2848	Acsl;Act42A;AGO1;AGO2;Akap200;ALiX;aop;aPKC;Arp2;Arpc2;Arpc4;ASPP;Atg4b;Atpalpha;Atx2;B4;bark;baz;Best1;betaggt-I;betaTub97EF;blow;brk;Bsg;Btk29A;bun;CalpB;CAP;Caper;capt;Cbl;Cdc42;CenB1A;CenG1A;cer;cert;CG10082;CG10089;CG10098;CG10126;CG10283;CG10337;CG10376;CG10413;CG10527;CG10874;CG10939;CG11050;CG11125;CG11426;CG1146;CG12004;CG12012;CG12054;CG12065;CG12163;CG12655;CG12746;CG13124;CG13252;CG13…
5kbUpTx	cnc_top50perTarget	swissregulon__hs__BACH2.p2	3.7	0.0538	cnc	**	cnc (inferredBy_Orthology).	Jra; kay; mor (inferredBy_MotifSimilarity_n_Orthology).	638	4923	18w;Act42A;Ada2b;Adar;AGO1;AGO2;Akap200;ALiX;alpha-Est7;AMPdeam;AnxB10;aop;AP-1sigma;Apc;aPKC;Arf51F;Arp2;Arpc2;Arpc4;Asx;Atg17;Atg4b;atl;Atpalpha;Atx2;B4;Baldspot;bark;baz;bchs;be;bel;Best1;betaggt-I;betaTub97EF;blow;brk;Bsg;Btk29A;bun;C3G;CalpA;CalpB;CAP;Caper;capt;Cdc42;ced-6;CenB1A;CenG1A;cer;cert;CG10082;CG10098;CG10126;CG10283;CG10337;CG10353;CG10376;CG10413;CG10527;CG10874;CG10916;CG10939;…
5kbUpTx	cnc_top50perTarget	transfac_pro__M04681	3.45	0.0522	cnc	*	Jra (inferredBy_Orthology).	Atf-2; Atf3; Atf6; CG44247; CrebA; CrebB; REPTOR-BP; cnc; kay (inferredBy_MotifSimilarity). Xbp1 (inferredBy_MotifSimilarity_n_Orthology).	315	2104	Acsl;aop;aPKC;ASPP;Atg18a;Atpalpha;Atxn7;B4;Best1;blow;Bmcp;Bsg;BtbVII;Btk29A;bun;C3G;CalpA;CAP;Cbl;CD98hc;cdc14;CenB1A;CenG1A;cert;CG10089;CG10103;CG10337;CG10353;CG10413;CG10527;CG10939;CG1105;CG1146;CG11486;CG12054;CG12065;CG12945;CG13124;CG13252;CG13698;CG13868;CG13887;CG13917;CG14441;CG14478;CG14767;CG15209;CG15211;CG15611;CG1572;CG1640;CG1677;CG17574;CG17746;CG2698;CG2865;CG30069;CG3008;CG3…
5kbUpTx	cnc_top50perTarget	cisbp__M6229	3.42	0.052	cnc	*	kay (inferredBy_Orthology).	Jra; cnc; ewg; maf-S; tj (inferredBy_MotifSimilarity_n_Orthology).	509	3786	18w;Act42A;Ada2b;AGO1;AGO2;Akap200;ALiX;aop;AP-1sigma;Arf51F;Arp2;Arpc2;ASPP;Asx;Atg17;Atg4b;atl;Atpalpha;Atx2;B4;Baldspot;bark;baz;be;Best1;betaggt-I;betaTub97EF;blow;brk;Bsg;BtbVII;Btk29A;bun;CAP;Caper;capt;cathD;Cbl;CenB1A;CenG1A;cer;cert;CG10082;CG10089;CG10098;CG10126;CG10283;CG10337;CG10527;CG10874;CG11050;CG11125;CG11357;CG11426;CG1146;CG11753;CG12012;CG12054;CG12065;CG12655;CG13124;CG1316…
5kbUpTx	cnc_top50perTarget	transfac_pro__M07682	3.38	0.0517	cnc	*	CrebB (directAnnotation).	Atf-2; Atf3; Atf6; CG44247; CrebA; Jra; REPTOR-BP; cnc; crc; kay (inferredBy_MotifSimilarity). Xbp1 (inferredBy_MotifSimilarity_n_Orthology).	298	1888	Acsl;ALiX;aPKC;ASPP;Atpalpha;blow;Bmcp;Bsg;BtbVII;Btk29A;bun;C3G;CalpA;CAP;Cbl;CD98hc;cdc14;CenB1A;CenG1A;CG10077;CG10082;CG10089;CG10103;CG10337;CG10353;CG10413;CG10527;CG10939;CG1105;CG11170;CG1146;CG11486;CG12004;CG12054;CG12065;CG12159;CG12945;CG13124;CG13868;CG13887;CG13917;CG14441;CG14478;CG14767;CG15611;CG1572;CG1640;CG1677;CG17574;CG17746;CG18659;CG2698;CG30015;CG30069;CG3008;CG30377;CG30…
5kbUpTx	cnc_top50perTarget	transfac_pro__M07572	3.09	0.0496	cnc	*		Atf-2; Atf3; Atf6; CG44247; CrebA; CrebB; Jra; REPTOR-BP; cnc; crc; kay (inferredBy_MotifSimilarity). Xbp1 (inferredBy_MotifSimilarity_n_Orthology).	193	1033	ASPP;Atpalpha;Best1;Bmcp;Bsg;BtbVII;bun;C3G;CAP;CD98hc;cdc14;CenB1A;CenG1A;CG10089;CG10103;CG10337;CG10353;CG10413;CG10527;CG1105;CG1146;CG11486;CG12945;CG13124;CG13868;CG13887;CG14478;CG14767;CG15611;CG17746;CG2698;CG30069;CG30377;CG30456;CG30460;CG31038;CG31635;CG31650;CG32066;CG32137;CG32369;CG34417;CG3638;CG42238;CG42524;CG43693;CG4393;CG4404;CG45049;CG45050;CG5830;CG6051;CG6231;CG6805;CG6959…
5kbUpTx	cnc_top50perTarget	hocomoco__SMRC1_MOUSE.H10MO.B	3.09	0.0496	cnc	*	mor (inferredBy_Orthology).	Jra; cnc; ewg; kay; maf-S; tj (inferredBy_MotifSimilarity_n_Orthology).	460	2927	18w;Act42A;AGO1;AGO2;Akap200;ALiX;aop;Arpc2;Arpc4;atl;Atpalpha;Atx2;B4;bark;baz;Best1;betaTub97EF;blow;brk;Bsg;BtbVII;Btk29A;bun;CAP;Caper;capt;CenB1A;CenG1A;cer;cert;CG10082;CG10098;CG10126;CG10283;CG10337;CG10376;CG10413;CG10527;CG10916;CG11050;CG11125;CG11426;CG1146;CG11753;CG12004;CG12012;CG12054;CG12065;CG12163;CG12730;CG13124;CG13255;CG13384;CG13698;CG13784;CG13868;CG13893;CG13907;CG13917;C…
5kbUpTx	cnc_top50perTarget	hocomoco__ATF7_HUMAN.H10MO.D	3.07	0.0495	cnc	*		Atf-2; Atf3; Atf6; CG44247; CrebA; CrebB; Jra; REPTOR-BP; cnc; crc; kay (inferredBy_MotifSimilarity). Xbp1 (inferredBy_MotifSimilarity_n_Orthology).	351	2369	Acsl;ALiX;AMPdeam;aop;aPKC;ASPP;Atg17;Atpalpha;B4;Best1;blow;Bmcp;Bsg;BtbVII;Btk29A;bun;C3G;CalpA;CAP;Cbl;CD98hc;cdc14;CenB1A;CenG1A;CG10077;CG10089;CG10103;CG10337;CG10353;CG10413;CG10527;CG10939;CG1105;CG11170;CG11357;CG1146;CG11486;CG11791;CG12054;CG12065;CG12581;CG12655;CG12945;CG13252;CG13698;CG13868;CG13887;CG13917;CG14441;CG14478;CG14767;CG15611;CG1572;CG1640;CG1677;CG16953;CG17574;CG17746…
5kbUpTx	cnc_top50perTarget	stark__TGACGTCAT	3.06	0.0494	cnc	*	CrebA (directAnnotation).	Atf-2; Atf3; Atf6; CG44247; CrebB; Jra; REPTOR-BP; cnc; crc; kay (inferredBy_MotifSimilarity). Xbp1 (inferredBy_MotifSimilarity_n_Orthology).	78	347	Atpalpha;Bmcp;Bsg;bun;C3G;cdc14;CenB1A;CenG1A;CG10413;CG12945;CG13868;CG13887;CG17746;CG30069;CG30377;CG30456;CG30460;CG3638;CG43693;CG4393;CG45049;CG45050;CG5065;CG5830;CG9005;cpo;cv-2;cv-c;DOR;dysc;E2f1;Eb1;Eip75B;ens;fdl;gish;glec;Glut4EF;Gprk2;heph;Hr4;htt;Ilk;Jra;kay;Khc;LamC;loco;luna;mamo;mbl;Mbs;Myo31DF;Pdk1;psq;Ptp61F;puc;Pvr;Rcd2;REPTOR;Roc2;rod;sbb;scramb1;scrib;shn;shot;slim;Snx3;stck…
5kbUpTx	cnc_top50perTarget	cisbp__M6467	3.02	0.0491	cnc	*	mor (inferredBy_Orthology).	Jra; cnc; ewg; kay; maf-S; tj (inferredBy_MotifSimilarity_n_Orthology).	459	2937	18w;Act42A;AGO1;AGO2;Akap200;ALiX;aop;Arpc2;Arpc4;atl;Atpalpha;Atx2;B4;bark;baz;Best1;betaTub97EF;blow;brk;Bsg;BtbVII;Btk29A;bun;CAP;Caper;capt;CenB1A;CenG1A;cer;cert;CG10082;CG10098;CG10126;CG10283;CG10337;CG10376;CG10413;CG10527;CG10916;CG11050;CG11125;CG11426;CG1146;CG11753;CG12004;CG12012;CG12054;CG12065;CG12163;CG12730;CG13124;CG13255;CG13384;CG13698;CG13784;CG13868;CG13893;CG13907;CG13917;C…
5kbUpTx	cnc_top50perTarget	homer__ATGACGTCATCN_JunD	3.01	0.0491	cnc	*	Jra (inferredBy_Orthology).	Atf-2; Atf3; Atf6; CG44247; CrebA; CrebB; cnc; crc; kay (inferredBy_MotifSimilarity). Xbp1 (inferredBy_MotifSimilarity_n_Orthology).	236	1337	Acsl;ASPP;Atpalpha;Atxn7;B4;Best1;blow;Bmcp;Bsg;BtbVII;Btk29A;bun;C3G;CalpA;CAP;CD98hc;cdc14;CenB1A;CenG1A;CG10089;CG10103;CG10337;CG10353;CG10413;CG10527;CG1105;CG1146;CG11486;CG12065;CG12945;CG13124;CG13868;CG13887;CG13917;CG14478;CG14767;CG15611;CG1572;CG1677;CG17746;CG2698;CG30069;CG30377;CG30456;CG30460;CG31038;CG31635;CG31650;CG31729;CG32066;CG32137;CG32147;CG32369;CG34417;CG3638;CG42238;CG…
5kbUpTx	cnc_w001	cisbp__M4570	4.5	0.0447	cnc	*	Jra (inferredBy_Orthology).	cnc; kay; mor (inferredBy_MotifSimilarity_n_Orthology).	811	2804	14-3-3epsilon;14-3-3zeta;a;Abl;Abp1;Act42A;Act5C;Actn;Ada2b;Ady43A;ago;AGO2;Akap200;Alh;ALiX;alph;alpha-Est3;alpha-Est7;alpha-Est9;alpha-Man-IIb;alphaTub84B;AnxB9;aop;AP-1gamma;AP-1mu;aph-1;aPKC;apt;Arf51F;Arf79F;Argk;Arp3;Arpc1;Arpc2;aru;Atf3;Atg1;Atg4a;Atpalpha;Atx2;B4;babos;barc;bark;baz;bbc;bbg;Best1;betaTub60D;betaTub97EF;bic;bif;blow;brat;brk;bru2;Bsg;Btk29A;btsz;bun;by;cact;Cad87A;CAH2;Cal…
5kbUpTx	cnc_w001	taipale__NFE2_DBD_NATGASTCATN	4.47	0.0446	cnc	**	cnc (inferredBy_Orthology).	Jra; kay (inferredBy_MotifSimilarity_n_Orthology).	951	3438	14-3-3epsilon;14-3-3zeta;18w;a;Abl;Abp1;Actn;Ada2b;AdipoR;Adk1;ago;AGO2;Akap200;Aldh-III;Alg-2;Alh;ALiX;alph;alpha-Est3;alpha-Est9;alpha-Man-IIb;alphaSnap;alphaTub84B;AMPdeam;AnxB11;AnxB9;aop;AP-1gamma;AP-1mu;aPKC;apt;Arc2;Arf51F;Arf79F;Argk;Arp1;Arp3;Arpc1;Arpc2;Asap;ASPP;Atet;Atf3;Atf6;Atg1;Atg17;Atg18a;Atg4a;Atpalpha;Atx2;B4;babos;Baldspot;barc;bark;baz;bbc;bbg;be;Best1;beta-Spec;betaTub60D;bi…
5kbUpTx	cnc_w001	cisbp__M5659	4.47	0.0446	cnc	**	cnc (inferredBy_Orthology).	Jra; kay (inferredBy_MotifSimilarity_n_Orthology).	741	2614	14-3-3epsilon;14-3-3zeta;18w;a;Abl;Abp1;Actn;ago;AGO2;Akap200;Aldh-III;Alh;ALiX;alph;alpha-Est9;alpha-Man-IIb;alphaTub84B;AnxB9;aop;AP-1gamma;AP-1mu;aph-1;aPKC;apt;Arf51F;Argk;Arp1;Arp3;Arpc1;Arpc2;Asap;Atet;Atf3;Atf6;Atg1;Atg4a;Atg4b;Atpalpha;Atx2;B4;babos;barc;bark;baz;bbc;bbg;Best1;beta-Spec;betaTub60D;betaTub97EF;bic;bif;bip1;blow;brat;bru2;Bsg;Btk29A;btsz;bun;by;cact;Cad87A;Cam;CAP;Caper;cap…
5kbUpTx	cnc_w001	scertf__spivak.GCN4	4.45	0.0445	cnc	*		Jra; kay (inferredBy_MotifSimilarity). NFAT; cnc (inferredBy_MotifSimilarity_n_Orthology).	670	2222	14-3-3epsilon;14-3-3zeta;18w;a;Abi;Abl;Abp1;Act5C;Actn;Ady43A;AGO1;AGO2;Akap200;Alh;ALiX;alpha-Est9;alphaTub84B;AnxB9;aop;AP-1mu;aph-1;aPKC;apt;Argk;Arp1;Arp2;Arp3;Arpc1;Arpc2;Atf3;Atg4b;Atpalpha;B4;babos;barc;bark;baz;bbc;bbg;Best1;betaTub60D;bic;bif;blow;brat;bru2;Bsg;Btk29A;btsz;bun;by;cact;Cad87A;CAH2;Cam;CAP;Caper;capt;capu;Cbl;cbt;CdGAPr;CenG1A;cer;cert;Cf2;CG10055;CG10082;CG10098;CG10126;C…
5kbUpTx	cnc_w001	cisbp__M4684	4.44	0.0445	cnc	*		Jra; kay (inferredBy_MotifSimilarity). cnc (inferredBy_MotifSimilarity_n_Orthology).	581	1752	14-3-3epsilon;14-3-3zeta;a;Abl;Actn;AGO2;Akap200;ALiX;alphaTub84B;AnxB9;aop;AP-1mu;apt;Argk;Arp3;Arpc1;Arpc2;Arpc4;Arpc5;Atf3;Atpalpha;Atx2;B4;babos;barc;bark;baz;bbc;bbg;Best1;beta-Spec;betaTub60D;bic;bif;blow;brat;Bsg;Btk29A;bun;by;cact;CalpB;Cam;CAP;Caper;capt;capu;Cbl;cbt;Cdep;CdGAPr;CenG1A;cert;Cf2;CG10055;CG10062;CG10098;CG10103;CG10126;CG10283;CG10376;CG10527;CG11141;CG11426;CG1146;CG11658…
5kbUpTx	cnc_w001	cisbp__M4623	4.44	0.0444	cnc	*	Jra (inferredBy_Orthology).	kay (inferredBy_MotifSimilarity). cnc (inferredBy_MotifSimilarity_n_Orthology).	599	1887	14-3-3zeta;18w;a;Abl;Act42A;Act5C;Actn;Ady43A;AGO1;AGO2;Akap200;Alh;ALiX;alpha-Est9;alphaTub84B;aop;aph-1;apt;Arf79F;Argk;Arp2;Arp3;Arpc1;Arpc2;aru;Atf3;Atg1;atl;Atpalpha;B4;babos;barc;bark;baz;bbc;bbg;Best1;betaggt-I;betaTub60D;betaTub97EF;bic;bif;blow;brat;bru2;Bsg;Btk29A;bun;by;cact;Cam;CAP;Caper;capt;capu;CASK;cbt;CdGAPr;cdi;CenG1A;cert;Cf2;CG10082;CG10098;CG10126;CG10283;CG10337;CG10376;CG10…
5kbUpTx	cnc_w001	hocomoco__FOSB_HUMAN.H10MO.C	4.36	0.044	cnc	*	kay (inferredBy_Orthology).	Jra (inferredBy_MotifSimilarity). cnc; mor (inferredBy_MotifSimilarity_n_Orthology).	754	2464	14-3-3epsilon;14-3-3zeta;18w;a;Abl;Abp1;Act42A;Act5C;Actn;Ady43A;AGO2;Akap200;Akt1;Alh;ALiX;alpha-Est3;alpha-Est9;alphaTub84B;AnxB9;aop;aph-1;apt;Arf51F;Arf79F;Arp3;Arpc1;Arpc2;aru;Atf3;Atg1;Atpalpha;Atx2;B4;babos;barc;bark;baz;bbc;bbg;Best1;beta-Spec;betaggt-I;betaTub60D;betaTub97EF;bic;bif;blow;brat;brk;bru2;Bsg;Btk29A;btsz;bun;bves;by;cact;Cam;CAP;Caper;capt;capu;CASK;Cbl;cbt;CdGAPr;cdi;CenG1A…
5kbUpTx	cnc_w001	swissregulon__sacCer__GCN4	4.35	0.044	cnc	*		Jra; kay (inferredBy_MotifSimilarity). NFAT; cnc (inferredBy_MotifSimilarity_n_Orthology).	787	2740	14-3-3epsilon;14-3-3zeta;18w;a;Abi;Abl;Abp1;Act5C;Actn;Ady43A;AGO1;AGO2;Akap200;Alh;ALiX;alpha-Est9;alpha-Man-IIb;alphaTub84B;AnxB9;aop;AP-1mu;aph-1;aPKC;apt;Arf51F;Argk;arm;Arp1;Arp2;Arp3;Arpc1;Arpc2;Asap;Atf3;Atg17;Atg4a;Atg4b;Atg8a;Atpalpha;B4;babos;barc;bark;baz;bbc;bbg;bc10;bdg;Best1;betaTub60D;bic;bif;blow;Bmcp;brat;bru2;Bsg;Btk29A;btsz;bun;bves;by;cact;Cad87A;CAH2;Cam;CAP;Caper;capt;capu;C…
5kbUpTx	cnc_w001	cisbp__M4607	4.35	0.044	cnc	*	kay (inferredBy_Orthology).	Jra (inferredBy_MotifSimilarity). cnc; maf-S (inferredBy_MotifSimilarity_n_Orthology).	676	2183	14-3-3epsilon;14-3-3zeta;18w;a;Abl;Act42A;Act5C;Actn;Ady43A;ago;AGO1;AGO2;Akap200;Alh;ALiX;alpha-Est9;alphaTub84B;aop;AP-1mu;aph-1;apt;Arf51F;Arf79F;Argk;Arp3;Arpc1;Arpc2;aru;Atf3;Atg1;Atg4a;Atpalpha;B4;babos;barc;bark;baz;bbc;bbg;Best1;betaggt-I;betaTub60D;betaTub97EF;bic;bif;blow;brat;bru2;Bsg;Btk29A;bun;by;cact;Cad87A;CalpB;Cam;CAP;Caper;capt;capu;CASK;cbt;CdGAPr;cdi;CenG1A;cer;cert;Cf2;CG1008…
5kbUpTx	cnc_w001	hocomoco__JUND_HUMAN.H10MO.A	4.34	0.0439	cnc	*	Jra (inferredBy_Orthology).	kay (inferredBy_MotifSimilarity). cnc (inferredBy_MotifSimilarity_n_Orthology).	670	2131	14-3-3zeta;a;Abl;Abp1;Act42A;Act5C;Actn;Ady43A;AGO2;Akap200;Alh;ALiX;alpha-Est9;alphaTub84B;AnxB9;aop;AP-1mu;aph-1;apt;Arf51F;Arf79F;Argk;Arp3;Arpc1;Arpc2;Atf3;Atg1;Atpalpha;B4;babos;barc;bark;baz;bbc;bbg;Best1;betaTub60D;betaTub97EF;bic;bif;blow;brat;brk;bru2;Bsg;Btk29A;btsz;bun;bves;by;cact;Cam;CAP;Caper;capt;capu;CASK;Cbl;cbt;CdGAPr;cdi;CenG1A;cert;Cf2;CG10055;CG10082;CG10098;CG10103;CG10126;C…
5kbUpTx	cnc_w001	hocomoco__FOSL2_HUMAN.H10MO.A	4.3	0.0437	cnc	*	kay (inferredBy_Orthology).	Jra; cnc; mor (inferredBy_MotifSimilarity_n_Orthology).	928	3335	14-3-3epsilon;14-3-3zeta;18w;a;Abl;Act42A;Act5C;Actn;Ada2b;Ady43A;ago;AGO2;Akap200;Akt1;Aldh-III;Alh;ALiX;alph;alpha-Est10;alpha-Est3;alpha-Est9;alphaTub84B;AnxB9;aop;AOX3;AP-1gamma;AP-1mu;aph-1;aPKC;apt;Arf79F;Argk;Arp1;Arp2;Arp3;Arpc1;Arpc2;Arpc4;Arpc5;aru;Asap;ASPP;Atf3;Atg1;Atg17;Atg4a;atl;Atpalpha;Atx2;B4;babos;Baldspot;barc;bark;baz;bbc;bbg;bc10;Best1;beta-Spec;betaggt-I;betaTub60D;betaTub9…
5kbUpTx	cnc_w001	yetfasco__YER064C_2094	4.27	0.0436	cnc	*		Jra; kay (inferredBy_MotifSimilarity). cnc (inferredBy_MotifSimilarity_n_Orthology).	878	3089	14-3-3epsilon;14-3-3zeta;18w;a;Abl;Abp1;Act42A;Act5C;Actn;Ady43A;ago;AGO1;AGO2;Akap200;Akt1;Aldh-III;Alh;ALiX;alph;alpha-Est9;alphaTub84B;AMPdeam;AnxB9;aop;AP-1-2beta;AP-1gamma;AP-1mu;aph-1;aPKC;apt;Arf51F;Arf79F;Argk;Arp1;Arp2;Arp3;Arpc1;Arpc2;Arpc4;Asap;Atf3;Atg1;Atg4a;atl;Atpalpha;B4;babos;barc;bark;baz;bbc;bbg;Best1;beta-Spec;betaggt-I;betaTub60D;betaTub97EF;bic;bif;bip1;blow;brat;brk;bru2;Bs…
5kbUpTx	cnc_w001	hocomoco__FOS_HUMAN.H10MO.A	4.27	0.0436	cnc	*	kay (inferredBy_Orthology).	Jra (inferredBy_MotifSimilarity). cnc; mor (inferredBy_MotifSimilarity_n_Orthology).	901	3160	14-3-3epsilon;14-3-3zeta;18w;a;Abl;Abp1;Act42A;Act5C;Actn;Ady43A;AGO2;Akap200;Akt1;Alh;ALiX;alph;alpha-Est10;alpha-Est7;alpha-Est9;alphaTub84B;AnxB9;aop;AP-1mu;Apc;aph-1;aPKC;apt;Arf51F;Arf79F;Argk;Arp1;Arp2;Arp3;Arpc1;Arpc2;Arpc4;aru;ASPP;Atf3;Atg1;Atg18a;atl;Atpalpha;Atx2;B4;babos;barc;bark;baz;bbc;bbg;bdg;Best1;beta-Spec;betaggt-I;betaTub60D;betaTub97EF;bic;bif;blow;brat;brk;bru2;Bsg;Btk29A;bt…
5kbUpTx	cnc_w001	transfac_pro__M04693	4.25	0.0435	cnc	*	kay (inferredBy_Orthology).	Jra (inferredBy_MotifSimilarity). NFAT; cnc (inferredBy_MotifSimilarity_n_Orthology).	744	2508	14-3-3epsilon;14-3-3zeta;a;Abl;Abp1;Actn;AGO2;Akap200;Alg-2;Alh;ALiX;alpha-Est9;alphaTub84B;AnxB9;aop;AP-1mu;aPKC;apt;Argk;Arp3;Arpc1;Arpc2;Arpc4;Arpc5;Atf3;Atg1;Atpalpha;Atx2;B4;babos;barc;bark;baz;bbc;bbg;Best1;beta-Spec;betaTub60D;bic;bif;blow;brat;bru2;Bsg;Btk29A;bun;bves;by;cact;CalpB;Cam;CAP;Caper;capt;capu;Cbl;cbt;Cdep;CdGAPr;cdi;CenG1A;cert;Cf2;CG10055;CG10062;CG10082;CG10098;CG10103;CG10…
5kbUpTx	cnc_w001	taipale__JDP2_full_ATGASTCAT	4.25	0.0435	cnc	*		kay (inferredBy_MotifSimilarity). Jra; cnc (inferredBy_MotifSimilarity_n_Orthology).	1174	4764	14-3-3epsilon;14-3-3zeta;18w;a;Abi;Abl;Abp1;Acsl;Act42A;Actn;Ada2b;Adgf-A;AdipoR;ago;AGO1;AGO2;Akap200;Aldh-III;Alg-2;Alh;ALiX;alph;alpha-Est3;alpha-Est7;alpha-Est9;alpha-Man-IIb;alphaSnap;alphaTub84B;AMPdeam;Amph;AnxB11;AnxB9;aop;AP-1gamma;AP-1mu;aph-1;aPKC;apt;Arc2;Arf51F;Arf79F;Argk;arm;Arp1;Arp2;Arp3;Arpc1;Arpc2;Arpc4;Arpc5;Asap;ASPP;Atet;Atf3;Atf6;Atg1;Atg17;Atg18a;Atg4a;Atg4b;Atg8a;Atpalpha…
5kbUpTx	cnc_w001	cisbp__M4608	4.25	0.0435	cnc	*	Jra (inferredBy_Orthology).	kay (inferredBy_MotifSimilarity). cnc (inferredBy_MotifSimilarity_n_Orthology).	984	3611	14-3-3epsilon;14-3-3zeta;18w;a;Abi;Abl;Abp1;Act42A;Act5C;Actn;Ada2b;Ady43A;ago;AGO1;AGO2;Akap200;Akt1;Aldh-III;Alh;ALiX;alph;alpha-Est10;alpha-Est3;alpha-Est7;alpha-Est9;alphaTub84B;AnxB9;aop;AOX3;AP-1gamma;AP-1mu;aph-1;apt;Arf51F;Arf79F;Argk;Arp1;Arp3;Arpc1;Arpc2;Arpc4;Arpc5;aru;Asap;Atf3;Atf6;Atg1;Atg17;Atg4a;Atpalpha;ATPCL;Atx2;B4;babos;barc;bark;baz;bbc;bbg;Best1;beta-Spec;betaggt-I;betaTub60…
5kbUpTx	cnc_w001	taipale__JDP2_DBD_ATGASTCAT	4.23	0.0434	cnc	*		Jra; kay (inferredBy_MotifSimilarity). cnc (inferredBy_MotifSimilarity_n_Orthology).	633	2148	14-3-3epsilon;14-3-3zeta;18w;a;Abl;Actn;AGO2;Akap200;Alh;ALiX;alph;alpha-Est9;alpha-Man-IIb;alphaTub84B;aop;AP-1mu;aph-1;aPKC;apt;Argk;Arp1;Arp3;Arpc1;Arpc2;Atg4a;Atg4b;Atpalpha;B4;babos;barc;bark;bbc;bbg;Best1;betaTub60D;bic;bif;bip1;blow;brat;Bsg;Btk29A;btsz;bun;by;cact;Cad87A;Cam;CAP;Caper;capt;capu;CASK;Cbl;cbt;CdGAPr;CenG1A;cert;Cf2;CG10055;CG10082;CG10098;CG10126;CG10283;CG10337;CG10413;CG1…
5kbUpTx	cnc_w001	cisbp__M6318	4.22	0.0433	cnc	*	Jra (inferredBy_Orthology).	kay (inferredBy_MotifSimilarity). cnc (inferredBy_MotifSimilarity_n_Orthology).	707	2308	14-3-3zeta;a;Abl;Abp1;Act42A;Act5C;Actn;Ady43A;AGO2;Akap200;Alh;ALiX;alpha-Est9;alphaTub84B;AnxB9;aop;AP-1mu;aph-1;apt;Arf51F;Arf79F;Argk;Arp3;Arpc1;Arpc2;Atf3;Atg1;Atg4b;Atpalpha;B4;babos;barc;bark;baz;bbc;bbg;Best1;beta-Spec;betaggt-I;betaTub60D;betaTub97EF;bic;bif;blow;brat;brk;bru2;Bsg;Btk29A;btsz;bun;bves;by;cact;Cam;CAP;Caper;capt;capu;CASK;Cbl;cbt;CdGAPr;cdi;CenG1A;cer;cert;Cf2;CG10055;CG1…
5kbUpTx	cnc_w001	homer__NNATGASTCATH_Fra1	4.2	0.0432	cnc	*		Jra; kay (inferredBy_MotifSimilarity). cnc; mor (inferredBy_MotifSimilarity_n_Orthology).	869	3101	14-3-3epsilon;14-3-3zeta;18w;a;Abl;Abp1;Act42A;Act5C;Actn;Ady43A;ago;AGO1;AGO2;Akap200;Akt1;Alh;ALiX;alph;alpha-Est10;alpha-Est9;alphaTub84B;AnxB9;aop;AP-1mu;Apc;aph-1;aPKC;apt;Arf51F;Argk;arm;Arp1;Arp2;Arp3;Arpc1;Arpc2;Atf3;Atg1;Atg17;Atg4b;atl;Atpalpha;Atx2;B4;babos;Baldspot;barc;bark;baz;bbc;bbg;bdg;Best1;betaggt-I;betaTub60D;betaTub97EF;bic;bif;blow;brat;brk;bru2;Bsg;Btk29A;btsz;bun;bves;by;c…
5kbUpTx	cnc_w001	homer__GATGACTCATCN_Jun-AP1	4.18	0.0431	cnc	*	Jra (inferredBy_Orthology).	kay (inferredBy_MotifSimilarity). cnc; mor (inferredBy_MotifSimilarity_n_Orthology).	888	3142	14-3-3epsilon;14-3-3zeta;18w;a;Abl;Abp1;Act42A;Act5C;Actn;Ada2b;Ady43A;ago;AGO1;AGO2;AhcyL1;Akap200;Alh;ALiX;alph;alpha-Est10;alpha-Est3;alpha-Est9;alphaTub84B;AnxB9;aop;AOX3;AP-1mu;Apc;aph-1;aPKC;apt;Arf51F;Arf79F;Argk;Arp1;Arp2;Arp3;Arpc1;Arpc2;Arpc4;aru;Atf3;Atg1;Atpalpha;Atx2;B4;babos;Baldspot;barc;bark;baz;bbc;bbg;Best1;beta-Spec;betaggt-I;betaTub60D;betaTub97EF;bic;bif;blow;brat;brk;bru2;Bs…
5kbUpTx	cnc_w001	taipale_tf_pairs__BACH1_ATGACTCAT_HT	4.16	0.043	cnc	**	cnc (inferredBy_Orthology).		853	3054	14-3-3epsilon;14-3-3zeta;a;Abi;Abl;Abp1;Acsl;Actn;Adgf-A;AGO1;AGO2;Akap200;Akt1;Aldh-III;Alh;ALiX;alph;alpha-Est7;alpha-Est9;alpha-Spec;alphaTub84B;AnxB9;aop;AP-1mu;Apc;aph-1;aPKC;apt;Arf51F;Argk;arm;Arp1;Arp2;Arp3;Arpc1;Arpc2;Asap;ASPP;Ate1;Atf3;Atg17;Atg18a;Atg4a;Atg4b;Atg8a;Atpalpha;Atx2;B4;babos;baf;barc;bark;baz;bbc;bbg;bc10;bdg;Best1;betaggt-I;betaTub60D;betaTub97EF;bic;bif;blow;brat;brk;br…
5kbUpTx	cnc_w001	cisbp__M5589	4.16	0.043	cnc	*		kay (inferredBy_MotifSimilarity). Jra; cnc (inferredBy_MotifSimilarity_n_Orthology).	1010	4034	14-3-3epsilon;14-3-3zeta;18w;a;Abi;Abl;Abp1;Actn;Adgf-A;AdipoR;ago;AGO2;Akap200;Aldh-III;Alh;ALiX;alph;alpha-Est9;alpha-Man-IIb;alphaSnap;alphaTub84B;AnxB9;aop;AP-1gamma;AP-1mu;aph-1;aPKC;apt;Arf51F;Argk;arm;Arp1;Arp3;Arpc1;Arpc2;Arpc4;Arpc5;Asap;ASPP;Atf3;Atf6;Atg1;Atg18a;Atg4a;Atg4b;Atg8a;Atpalpha;Atx2;B4;babos;Baldspot;barc;bark;baz;bbc;bbg;bc10;bdg;Best1;beta-Spec;betaTub60D;betaTub97EF;bic;b…
5kbUpTx	cnc_w001	cisbp__M5587	4.15	0.043	cnc	*		Jra; kay (inferredBy_MotifSimilarity). cnc (inferredBy_MotifSimilarity_n_Orthology).	515	1651	14-3-3epsilon;14-3-3zeta;a;Abl;Actn;AGO2;Akap200;Alh;ALiX;alphaTub84B;aop;AP-1mu;apt;Argk;Arp1;Arp3;Arpc1;Arpc2;Atpalpha;B4;babos;barc;bbc;bbg;Best1;betaTub60D;bic;bip1;blow;brat;Btk29A;btsz;bun;by;cact;Cad87A;CAP;Caper;capt;capu;CASK;Cbl;cbt;CdGAPr;CenG1A;Cf2;CG10055;CG10082;CG10098;CG10126;CG10283;CG10413;CG10479;CG10939;CG11050;CG11122;CG11141;CG11426;CG11593;CG12004;CG12007;CG12012;CG12054;CG…
5kbUpTx	cnc_w001	cisbp__M4506	4.09	0.0427	cnc	*	Jra (inferredBy_Orthology).	kay (inferredBy_MotifSimilarity). cnc; mor (inferredBy_MotifSimilarity_n_Orthology).	1024	3894	14-3-3epsilon;14-3-3zeta;18w;a;Abi;Abl;Abp1;Act42A;Act5C;Actn;Ada2b;Ady43A;ago;AGO1;AGO2;AhcyL1;Akap200;Akt1;Aldh-III;Alg-2;Alh;ALiX;alph;alpha-Est10;alpha-Est3;alpha-Est9;alpha-Man-IIb;alphaTub84B;AMPdeam;AnxB10;AnxB9;aop;AOX3;AP-1-2beta;AP-1gamma;AP-1mu;aph-1;apt;Arf51F;Arf79F;Argk;Arp2;Arp3;Arpc1;Arpc2;aru;Atf3;Atf6;Atg1;Atg4a;atl;Atpalpha;Atx2;B4;babos;Baldspot;barc;bark;baz;bbc;bbg;be;Best1;…
5kbUpTx	cnc_w001	cisbp__M2979	4.02	0.0424	cnc	**	cnc (inferredBy_Orthology).	Jra (inferredBy_MotifSimilarity_n_Orthology).	455	1385	14-3-3epsilon;14-3-3zeta;a;Abl;Actn;AGO2;Akap200;ALiX;alpha-Man-IIb;alphaTub84B;AP-1mu;apt;Arp1;Arp3;Arpc1;Arpc2;Atg1;Atg4a;Atpalpha;B4;babos;barc;bark;baz;bbc;Best1;betaTub60D;bic;blow;brat;bru2;Bsg;Btk29A;bun;by;cact;Cad87A;CAP;Caper;capu;cbt;CdGAPr;CenG1A;cert;CG10098;CG10126;CG10283;CG10337;CG10795;CG11141;CG11873;CG12007;CG12012;CG12054;CG12655;CG13117;CG13314;CG13366;CG13506;CG13698;CG13751…
5kbUpTx	cnc_w001	taipale__Jdp2_DBD_ATGASTCAT_repr	4.02	0.0423	cnc	*		kay (inferredBy_MotifSimilarity). Jra; cnc (inferredBy_MotifSimilarity_n_Orthology).	1209	4951	14-3-3epsilon;14-3-3zeta;18w;a;Abi;Abl;Abp1;Act42A;Act5C;Actn;Ada2b;Adar;Adgf-A;AdipoR;Adk1;Ady43A;ago;AGO1;AGO2;Akap200;Akt1;Aldh-III;Alg-2;Alh;ALiX;alph;alpha-Est3;alpha-Est7;alpha-Est9;alpha-Man-IIb;alphaSnap;alphaTub84B;AMPdeam;Amph;Ank;AnxB11;AnxB9;aop;AP-1gamma;AP-1mu;aph-1;aPKC;Aps;apt;Arc2;Arf51F;Arf79F;Argk;arm;Arp1;Arp2;Arp3;Arpc1;Arpc2;Arpc4;Arpc5;Asap;Asph;ASPP;Atet;Atf3;Atf6;Atg1;Atg…
5kbUpTx	cnc_w001	hocomoco__JUN_HUMAN.H10MO.A	3.99	0.0422	cnc	*	Jra (inferredBy_Orthology).	kay (inferredBy_MotifSimilarity). cnc; mor (inferredBy_MotifSimilarity_n_Orthology).	955	3545	14-3-3epsilon;14-3-3zeta;18w;a;aay;Abl;Abp1;Acsl;Act42A;Act5C;Actn;Ada2b;Ady43A;AGO1;AGO2;Akap200;Akt1;Aldh-III;Alh;ALiX;alph;alpha-Est10;alpha-Est3;alpha-Est9;alphaTub84B;AnxB9;aop;AOX3;AP-1mu;Apc;aph-1;aPKC;apt;Arf79F;Argk;Arp2;Arp3;Arpc1;Arpc2;Arpc4;Arpc5;aru;ASPP;Atf3;Atg1;Atg4b;atl;Atpalpha;Atx2;B4;babos;barc;bark;baz;bbc;bbg;bdg;Best1;beta-Spec;betaggt-I;betaTub60D;betaTub97EF;bic;bif;bip1;…
5kbUpTx	cnc_w001	homer__ATGACTCATC_AP-1	3.97	0.0421	cnc	*	Jra (inferredBy_Orthology).	kay (inferredBy_MotifSimilarity). cnc; maf-S; mor (inferredBy_MotifSimilarity_n_Orthology).	962	3545	14-3-3epsilon;14-3-3zeta;18w;a;Abl;Abp1;Act42A;Act5C;Actn;Ada2b;Ady43A;ago;AGO1;AGO2;AhcyL1;Akap200;Akt1;Aldh-III;Alh;ALiX;alph;alpha-Est10;alpha-Est3;alpha-Est9;alphaTub84B;AnxB9;aop;AOX3;AP-1gamma;AP-1mu;Apc;aph-1;aPKC;apt;Arf51F;Arf79F;Argk;Arp1;Arp2;Arp3;Arpc1;Arpc2;Arpc4;Arpc5;aru;ASPP;Atf3;Atg1;Atg4b;Atpalpha;Atx2;B4;babos;Baldspot;barc;bark;baz;bbc;bbg;be;Best1;beta-Spec;betaggt-I;betaTub6…
5kbUpTx	cnc_w001	cisbp__M6038	3.97	0.0421	cnc	*		kay (inferredBy_MotifSimilarity). Jra; cnc (inferredBy_MotifSimilarity_n_Orthology).	1183	4998	14-3-3epsilon;14-3-3zeta;18w;a;Abi;Abl;Abp1;Act42A;Act5C;Actn;Ada2b;Adar;Adgf-A;AdipoR;Adk1;ago;AGO1;AGO2;Akap200;Akt1;Aldh-III;Alg-2;Alh;ALiX;alph;alpha-Est3;alpha-Est7;alpha-Est9;alpha-Man-IIb;alphaSnap;alphaTub84B;AMPdeam;Amph;AnxB11;AnxB9;aop;AP-1gamma;AP-1mu;Apc;aph-1;aPKC;apt;Arf51F;Arf79F;Argk;arm;Arp1;Arp2;Arp3;Arpc1;Arpc2;Arpc4;Arpc5;Asap;Asph;ASPP;Atet;Atf3;Atf6;Atg1;Atg17;Atg18a;Atg4a;…
5kbUpTx	cnc_w001	cisbp__M6230	3.94	0.0419	cnc	*	kay (inferredBy_Orthology).	Jra; cnc; mor (inferredBy_MotifSimilarity_n_Orthology).	549	1720	14-3-3epsilon;14-3-3zeta;a;Abl;Act42A;Actn;Ady43A;AGO2;Akap200;Alh;ALiX;alpha-Est9;alphaTub84B;aop;AP-1mu;apt;Arp3;Arpc1;Arpc2;Atf3;Atpalpha;B4;babos;barc;bark;baz;bbc;bbg;Best1;betaTub60D;betaTub97EF;bic;bif;blow;brat;bru2;Bsg;Btk29A;btsz;bun;by;cact;Cam;CAP;Caper;capt;capu;CASK;cbt;CdGAPr;cdi;CenG1A;cert;Cf2;CG10082;CG10098;CG10126;CG10283;CG10337;CG10376;CG10413;CG10527;CG11050;CG11125;CG11141…
5kbUpTx	cnc_w001	hocomoco__JUNB_HUMAN.H10MO.C	3.93	0.0419	cnc	*	Jra (inferredBy_Orthology).	cnc; kay; mor (inferredBy_MotifSimilarity_n_Orthology).	607	1888	14-3-3epsilon;14-3-3zeta;18w;a;Abl;Actn;Ady43A;ago;AGO2;Akap200;Alh;ALiX;alpha-Est9;alphaTub84B;aop;AOX3;aph-1;apt;Arf79F;Argk;Arp1;Arp3;Arpc1;Arpc2;aru;ASPP;Atf3;Atpalpha;B4;babos;barc;bark;baz;bbc;bbg;Best1;betaggt-I;betaTub60D;betaTub97EF;bic;bif;blow;brat;Bsg;Btk29A;btsz;bun;by;cact;Cam;CAP;Caper;capt;capu;CASK;Cbl;cbt;CdGAPr;cdi;CenG1A;cer;cert;Cf2;CG10082;CG10098;CG10126;CG10283;CG10337;CG1…
5kbUpTx	cnc_w001	hocomoco__FOSL2_MOUSE.H10MO.A	3.93	0.0419	cnc	*	kay (inferredBy_Orthology).	Jra; cnc; mor (inferredBy_MotifSimilarity_n_Orthology).	525	1615	14-3-3epsilon;14-3-3zeta;a;Abl;Act42A;Actn;Ady43A;AGO2;Akap200;Alh;ALiX;alpha-Est9;alphaTub84B;aop;AP-1mu;apt;Arp3;Arpc1;Arpc2;Atf3;Atpalpha;B4;babos;barc;bark;baz;bbc;bbg;Best1;betaTub60D;betaTub97EF;bic;bif;blow;brat;bru2;Btk29A;btsz;bun;by;cact;Cam;CAP;Caper;capt;capu;CASK;cbt;CdGAPr;cdi;CenG1A;cert;Cf2;CG10098;CG10126;CG10283;CG10337;CG10376;CG10413;CG10527;CG11050;CG11125;CG11141;CG11426;CG1…
5kbUpTx	cnc_w001	yetfasco__YIL056W_2091	3.9	0.0417	cnc	*		Jra; kay (inferredBy_MotifSimilarity). cnc; mor (inferredBy_MotifSimilarity_n_Orthology).	618	1977	14-3-3zeta;18w;a;Abl;Abp1;Act42A;Actn;Ady43A;ago;AGO2;Akap200;Aldh-III;Alh;ALiX;alpha-Est9;alphaTub84B;aop;AP-1mu;apt;Arf79F;Argk;Arp3;Arpc1;Arpc2;Atf3;Atpalpha;B4;babos;barc;bark;baz;bbc;bbg;Best1;betaTub60D;betaTub97EF;bic;bif;bip1;blow;brat;brk;bru2;Btk29A;bun;by;cact;Cam;CAP;Caper;capt;capu;CASK;cbt;CdGAPr;cdi;CenG1A;cer;cert;Cf2;CG10055;CG10098;CG10126;CG10283;CG10337;CG10527;CG10795;CG11050…
5kbUpTx	cnc_w001	cisbp__M6319	3.85	0.0415	cnc	*	Jra (inferredBy_Orthology).	kay (inferredBy_MotifSimilarity). cnc; mor (inferredBy_MotifSimilarity_n_Orthology).	939	3478	14-3-3epsilon;14-3-3zeta;18w;a;aay;Abl;Abp1;Acsl;Act42A;Act5C;Actn;Ada2b;Ady43A;AGO1;AGO2;Akap200;Akt1;Aldh-III;Alh;ALiX;alph;alpha-Est10;alpha-Est3;alpha-Est9;alpha-Spec;alphaTub84B;AnxB9;aop;AOX3;AP-1mu;Apc;aph-1;aPKC;apt;Arf79F;Argk;Arp2;Arp3;Arpc1;Arpc2;Arpc4;Arpc5;aru;ASPP;Atf3;Atg1;atl;Atpalpha;Atx2;B4;babos;barc;bark;baz;bbc;bbg;bdg;Best1;beta-Spec;betaggt-I;betaTub60D;betaTub97EF;bic;bif;…
5kbUpTx	cnc_w001	transfac_public__M00495	3.81	0.0413	cnc	**	cnc (inferredBy_Orthology).	Jra (inferredBy_MotifSimilarity_n_Orthology).	450	1403	14-3-3epsilon;14-3-3zeta;18w;a;Abl;Actn;AGO1;AGO2;Akap200;ALiX;alpha-Man-IIb;alphaTub84B;AP-1mu;apt;Arf51F;Arp1;Arp3;Arpc1;Arpc2;Atf3;Atg1;Atg4a;Atpalpha;B4;barc;bark;bbc;Best1;betaTub60D;bic;blow;brat;Bsg;Btk29A;bun;by;cact;Cad87A;Cam;CAP;Caper;capu;cbt;CdGAPr;CenG1A;cert;Cf2;CG10098;CG10126;CG10283;CG10337;CG10376;CG11141;CG1146;CG11873;CG12007;CG12012;CG12054;CG12655;CG13117;CG13314;CG13366;CG…
5kbUpTx	cnc_w001	yetfasco__YEL009C_1363	3.79	0.0412	cnc	*		Jra; kay (inferredBy_MotifSimilarity). NFAT; cnc; maf-S; tj (inferredBy_MotifSimilarity_n_Orthology).	666	2269	14-3-3zeta;a;Abl;Abp1;Acsl;Act42A;Act5C;Actn;Ady43A;AGO2;Akap200;Akt1;Alh;ALiX;alpha-Est9;alphaTub84B;AnxB9;aop;AP-1mu;aph-1;aPKC;apt;Argk;Arp2;Arp3;Arpc1;Arpc2;ASPP;Atf3;Atg1;Atg4b;atl;Atpalpha;B4;babos;barc;bark;baz;bbc;bbg;Best1;betaggt-I;betaTub60D;betaTub97EF;bic;bif;blow;brat;brk;bru2;Bsg;Btk29A;bun;Bx;by;cact;Cam;CAP;Caper;capt;capu;CASK;cbt;Cdc42;CdGAPr;cdi;CenB1A;CenG1A;cer;Cf2;CG10055;C…
5kbUpTx	cnc_w001	cisbp__M4526	3.76	0.041	cnc	*	mor (inferredBy_Orthology).	Jra; cnc; ewg; kay; maf-S; tj (inferredBy_MotifSimilarity_n_Orthology).	602	1885	14-3-3zeta;18w;a;Abl;Act42A;Act5C;Actn;Ady43A;AGO1;AGO2;Akap200;Akt1;Alh;ALiX;alpha-Est9;alphaTub84B;aop;aph-1;apt;Argk;Arp3;Arpc1;Arpc2;aru;Atf3;Atg1;atl;Atpalpha;B4;babos;barc;bark;baz;bbc;bbg;Best1;betaggt-I;betaTub60D;bic;bif;blow;brat;bru2;Bsg;Btk29A;btsz;bun;by;cact;Cam;CAP;Caper;capt;capu;CASK;cbt;CdGAPr;cdi;CenG1A;cert;CG10055;CG10098;CG10126;CG10283;CG10337;CG10376;CG10413;CG10527;CG1079…
5kbUpTx	cnc_w001	cisbp__M2980	3.44	0.0394	cnc	**	cnc (inferredBy_Orthology).	Jra; kay (inferredBy_MotifSimilarity_n_Orthology).	714	2505	14-3-3epsilon;14-3-3zeta;18w;a;Abl;Abp1;Acsl;Act42A;Act5C;Actn;Ada2b;Adgf-A;Ady43A;AGO1;Akap200;Akt1;Aldh-III;Alh;ALiX;alph;alpha-Est9;alpha-Man-IIb;alphaTub84B;Amph;AnxB9;aop;AP-1gamma;AP-1mu;apt;Arf51F;Arf79F;Argk;Arp1;Arp2;Arp3;Arpc1;Arpc2;Atf3;Atg1;Atg17;Atg4b;Atpalpha;Atx2;B4;babos;Baldspot;barc;bark;baz;bbc;bbg;Best1;betaTub60D;betaTub97EF;bic;bif;blow;brat;brk;bru2;Bsg;Btk29A;bun;by;cact;C…
5kbUpTx	cnc_w001	transfac_public__M00490	3.42	0.0393	cnc	**	cnc (inferredBy_Orthology).	Jra; kay (inferredBy_MotifSimilarity_n_Orthology).	720	2549	14-3-3epsilon;14-3-3zeta;18w;a;Abl;Abp1;Acsl;Act42A;Act5C;Actn;Ada2b;Adgf-A;Ady43A;AGO1;Akap200;Akt1;Aldh-III;Alh;ALiX;alph;alpha-Est9;alphaTub84B;Amph;AnxB9;aop;AP-1gamma;AP-1mu;apt;Arf51F;Arf79F;Argk;Arp1;Arp2;Arp3;Arpc1;Arpc2;Atf3;Atg1;Atg17;Atg4b;Atpalpha;Atx2;B4;babos;Baldspot;barc;bark;baz;bbc;bbg;Best1;betaTub60D;betaTub97EF;bic;bif;blow;brat;brk;bru2;Bsg;Btk29A;bun;by;cact;Cad87A;CAP;Cape…
5kbUpTx	cnc_w001	hocomoco__SMRC1_MOUSE.H10MO.B	3.35	0.039	cnc	*	mor (inferredBy_Orthology).	Jra; cnc; ewg; kay; maf-S; tj (inferredBy_MotifSimilarity_n_Orthology).	741	2622	14-3-3zeta;18w;a;Abl;Abp1;Act42A;Act5C;Actn;Ady43A;AGO1;AGO2;Akap200;Alh;ALiX;alpha-Est3;alpha-Est9;alphaTub84B;AnxB9;aop;AOX3;AP-1mu;apt;Arf79F;Argk;Arp3;Arpc1;Arpc2;Arpc4;aru;Atf3;Atg1;atl;Atpalpha;Atx2;B4;babos;barc;bark;baz;bbc;bbg;Best1;betaTub60D;betaTub97EF;bic;bif;bip1;blow;brat;brk;bru2;Bsg;Btk29A;btsz;bun;bves;by;cact;Cam;CAP;Caper;capt;capu;CASK;cbt;CdGAPr;cdi;CenB1A;CenG1A;cer;cert;Cf…
5kbUpTx	cnc_w001	cisbp__M6467	3.29	0.0387	cnc	*	mor (inferredBy_Orthology).	Jra; cnc; ewg; kay; maf-S; tj (inferredBy_MotifSimilarity_n_Orthology).	558	1816	14-3-3zeta;a;Abl;Abp1;Act42A;Act5C;Actn;Ady43A;AGO2;Akap200;Alh;ALiX;alpha-Est9;alphaTub84B;AnxB9;aop;AP-1mu;apt;Argk;Arp3;Arpc1;Arpc2;aru;Atf3;Atpalpha;Atx2;B4;babos;barc;bark;baz;bbc;bbg;Best1;betaTub60D;betaTub97EF;bic;blow;brat;brk;bru2;Bsg;Btk29A;btsz;bun;by;cact;Cam;CAP;Caper;capt;capu;CASK;cbt;CdGAPr;CenB1A;CenG1A;cer;cert;Cf2;CG10055;CG10098;CG10126;CG10283;CG10337;CG10413;CG10527;CG11050…
5kbUpTx	cnc_w001	swissregulon__hs__BACH2.p2	3.26	0.0385	cnc	**	cnc (inferredBy_Orthology).	Jra; kay; mor (inferredBy_MotifSimilarity_n_Orthology).	675	2327	14-3-3epsilon;14-3-3zeta;18w;a;Abl;Act5C;Actn;Ady43A;AGO1;AGO2;Akap200;Alh;ALiX;alph;alpha-Est10;alpha-Est9;alphaTub84B;AnxB10;AnxB9;aop;apt;Arf79F;Argk;Arp2;Arp3;Arpc1;Arpc2;aru;Atf3;Atg1;Atpalpha;Atx2;B4;babos;Baldspot;barc;bark;baz;bbc;bbg;Best1;betaTub60D;betaTub97EF;bic;bif;blow;brat;bru2;Bsg;Btk29A;btsz;bun;by;cact;Cam;CAP;Caper;capt;capu;CASK;cbt;CdGAPr;cdi;CenG1A;cer;cert;Cf2;CG10098;CG10…
5kbUpTx	cnc_w001	neph__UW.Motif.0001	3.21	0.0383	cnc	*		kay (inferredBy_MotifSimilarity). Jra; cnc (inferredBy_MotifSimilarity_n_Orthology).	494	1621	14-3-3zeta;a;Abl;Acsl;Actn;Ady43A;AGO2;Akap200;Alh;ALiX;alphaTub84B;AnxB9;aop;AP-1mu;apt;Argk;Arp3;Arpc1;Arpc2;ASPP;Atf3;Atpalpha;Atx2;B4;babos;barc;bark;bbg;Best1;betaTub60D;brat;bru2;Bsg;Btk29A;bun;by;cact;Cam;CAP;Caper;capt;capu;CASK;Cdc42;CdGAPr;cdi;CenB1A;CenG1A;cert;CG10055;CG10098;CG10126;CG10283;CG10337;CG10413;CG10527;CG11050;CG11125;CG11141;CG11426;CG1146;CG11658;CG12004;CG12012;CG12054…
5kbUpTx	cnc_w001	stark__TGACGTCAT	3.08	0.0376	cnc	*	CrebA (directAnnotation).	Atf-2; Atf3; Atf6; CG44247; CrebB; Jra; REPTOR-BP; cnc; crc; kay (inferredBy_MotifSimilarity). Xbp1 (inferredBy_MotifSimilarity_n_Orthology).	117	303	alphaTub84B;Argk;Atpalpha;BicD;BRWD3;Bsg;bun;by;C3G;cbt;cdc14;CenB1A;CG10413;CG12384;CG12945;CG13366;CG13868;CG13887;CG1635;CG17746;CG30069;CG30377;CG30456;CG30460;CG32264;CG32982;CG34383;CG3638;CG42673;CG43693;CG44085;CG45049;CG45050;CG5065;CG5830;CG8176;CG9005;cora;cpo;CrebB;cv-2;cv-c;Dhc64C;dysc;Eb1;Egfr;Eip75B;elm;ens;eya;fdl;Flo2;gish;glec;Glut4EF;Gprk2;heph;hts;htt;Ilk;IP3K1;jbug;Jra;kay;Kh…
5kbUpTx	cnc_w001	transfac_pro__M04681	3.07	0.0376	cnc	*	Jra (inferredBy_Orthology).	Atf-2; Atf3; Atf6; CG44247; CrebA; CrebB; REPTOR-BP; cnc; kay (inferredBy_MotifSimilarity). Xbp1 (inferredBy_MotifSimilarity_n_Orthology).	294	914	14-3-3zeta;Abi;Abl;alpha-Spec;alphaTub84B;AnxB9;AP-2alpha;Argk;Arp1;ASPP;Atpalpha;babo;bbg;beta-Spec;BicD;Bmcp;BRWD3;Bsg;BtbVII;bun;by;C3G;Cad87A;Cam;CAP;cbt;Ccm3;CD98hc;cdc14;CenB1A;CenG1A;CG10089;CG10103;CG10337;CG10365;CG10413;CG10527;CG1105;CG1146;CG11486;CG12290;CG12384;CG12945;CG13124;CG13868;CG13887;CG14275;CG14767;CG14883;CG14985;CG15611;CG1572;CG1635;CG16717;CG17746;CG18343;CG2698;CG3006…
5kbUpTx	cnc_w005	cisbp__M4684	5.71	0.0832	cnc	*		Jra; kay (inferredBy_MotifSimilarity). cnc (inferredBy_MotifSimilarity_n_Orthology).	298	2935	Act42A;AGO1;aop;Arpc4;bark;baz;Best1;blow;Bsg;Btk29A;bun;CAP;capt;cert;CG10098;CG10103;CG10126;CG10413;CG10874;CG10916;CG10939;CG11050;CG1146;CG12004;CG12163;CG12655;CG12730;CG13252;CG13698;CG13784;CG13907;CG13921;CG14073;CG15012;CG15098;CG15211;CG1677;CG16791;CG17019;CG17574;CG17834;CG18659;CG1890;CG1943;CG2938;CG30377;CG30423;CG31038;CG31324;CG31523;CG31694;CG31710;CG31729;CG32137;CG32365;CG323…
5kbUpTx	cnc_w005	scertf__spivak.GCN4	5.67	0.0829	cnc	*		Jra; kay (inferredBy_MotifSimilarity). NFAT; cnc (inferredBy_MotifSimilarity_n_Orthology).	287	2900	Act42A;AGO1;aop;Arp2;Atg17;bark;baz;Best1;blow;Bmcp;Bsg;Btk29A;bun;CAP;capt;cert;CG10077;CG10098;CG10126;CG10413;CG10939;CG1105;CG11050;CG1146;CG12004;CG12655;CG12730;CG13698;CG13907;CG14073;CG15012;CG15211;CG1677;CG16791;CG17019;CG17574;CG17834;CG18659;CG1890;CG1943;CG2938;CG30377;CG30423;CG31038;CG31324;CG31523;CG31694;CG32137;CG32365;CG32369;CG33144;CG33970;CG34228;CG34417;CG3529;CG3638;CG4025…
5kbUpTx	cnc_w005	swissregulon__sacCer__GCN4	5.55	0.0818	cnc	*		Jra; kay (inferredBy_MotifSimilarity). NFAT; cnc (inferredBy_MotifSimilarity_n_Orthology).	279	2740	AGO1;aop;Arp2;Atg17;Atg8a;bark;baz;Best1;blow;Bmcp;Bsg;Btk29A;bun;CAP;capt;cert;CG10077;CG10098;CG10126;CG10413;CG10874;CG10939;CG11050;CG1146;CG11486;CG11537;CG12004;CG12730;CG13907;CG14073;CG15012;CG15211;CG1677;CG16791;CG17019;CG17574;CG17834;CG18659;CG1890;CG1943;CG2938;CG30423;CG31038;CG31324;CG31523;CG31694;CG32137;CG32369;CG33144;CG33970;CG34228;CG34417;CG3529;CG4025;CG4101;CG42238;CG42524…
5kbUpTx	cnc_w005	homer__NNATGASTCATH_Fra1	5.53	0.0816	cnc	*		Jra; kay (inferredBy_MotifSimilarity). cnc; mor (inferredBy_MotifSimilarity_n_Orthology).	304	3071	Act42A;AGO1;aop;Arp2;Atg17;atl;bark;baz;Best1;betaggt-I;blow;Bsg;Btk29A;bun;CAP;capt;cert;CG10098;CG10126;CG10413;CG10916;CG10939;CG1105;CG11050;CG11125;CG1146;CG12004;CG12163;CG13252;CG13698;CG13907;CG13921;CG14073;CG15012;CG15098;CG15211;CG1677;CG16791;CG17574;CG17834;CG18659;CG18858;CG1890;CG1943;CG2938;CG30423;CG31038;CG31523;CG31694;CG31710;CG31729;CG32137;CG32369;CG33144;CG33970;CG34228;CG3…
5kbUpTx	cnc_w005	homer__GATGACTCATCN_Jun-AP1	5.5	0.0813	cnc	*	Jra (inferredBy_Orthology).	kay (inferredBy_MotifSimilarity). cnc; mor (inferredBy_MotifSimilarity_n_Orthology).	377	4467	Acsl;Act42A;AGO1;alpha-Est7;AMPdeam;aop;Arp2;Arpc4;Atg17;atl;bark;baz;be;Best1;betaggt-I;blow;Bsg;Btk29A;bun;CAP;capt;CenB1A;cert;CG10089;CG10098;CG10103;CG10126;CG10413;CG10874;CG10916;CG10939;CG1105;CG11050;CG11125;CG1146;CG11486;CG11537;CG12004;CG12163;CG12581;CG12655;CG12730;CG13252;CG13698;CG13784;CG13868;CG13907;CG13921;CG14073;CG14767;CG15012;CG15098;CG15211;CG15611;CG1572;CG16721;CG1677;C…
5kbUpTx	cnc_w005	cisbp__M4570	5.49	0.0813	cnc	*	Jra (inferredBy_Orthology).	cnc; kay; mor (inferredBy_MotifSimilarity_n_Orthology).	393	4947	Act42A;AGO1;alpha-Est7;AMPdeam;AnxB10;aop;Aps;Arp2;Asx;atl;bark;baz;be;Best1;betaggt-I;blow;Bsg;Btk29A;bun;CalpA;CAP;capt;CenB1A;cert;CG10098;CG10103;CG10126;CG10413;CG10874;CG10916;CG10939;CG11050;CG11125;CG1146;CG11486;CG11537;CG11791;CG12004;CG12163;CG12581;CG12655;CG12730;CG13252;CG13698;CG13784;CG13907;CG13921;CG14073;CG14767;CG15012;CG15098;CG15211;CG1572;CG1677;CG16791;CG17019;CG17574;CG17…
5kbUpTx	cnc_w005	hocomoco__FOSL2_HUMAN.H10MO.A	5.48	0.0812	cnc	*	kay (inferredBy_Orthology).	Jra; cnc; mor (inferredBy_MotifSimilarity_n_Orthology).	385	4447	Act42A;AdipoR;AGO1;alpha-Est7;AMPdeam;aop;Arp2;Arpc4;Atg17;Atg8a;atl;bark;baz;be;Best1;betaggt-I;blow;Bmcp;Bsg;Btk29A;bun;CalpA;CAP;capt;cathD;CenB1A;cert;CG10077;CG10098;CG10103;CG10126;CG10413;CG10874;CG10916;CG10939;CG1105;CG11050;CG11125;CG1146;CG11486;CG11537;CG12004;CG12163;CG12581;CG12655;CG12730;CG13252;CG13698;CG13868;CG13907;CG13921;CG14073;CG15012;CG15098;CG15211;CG15611;CG1572;CG1677;…
5kbUpTx	cnc_w005	taipale_tf_pairs__BACH1_ATGACTCAT_HT	5.42	0.0806	cnc	**	cnc (inferredBy_Orthology).		350	4030	Acsl;Act42A;Adgf-A;AdipoR;AGO1;alpha-Est7;aop;Arp2;Arpc4;Atg17;Atg8a;atl;bark;baz;Best1;betaggt-I;blow;Bmcp;Bsg;Btk29A;bun;CalpA;CAP;capt;CenB1A;cert;CG10077;CG10098;CG10126;CG10413;CG10874;CG10939;CG1105;CG11050;CG11125;CG1146;CG11486;CG11537;CG12004;CG12163;CG12655;CG12730;CG13252;CG13698;CG13784;CG13868;CG13907;CG13921;CG14073;CG15012;CG15098;CG15211;CG1677;CG16791;CG16953;CG17574;CG17834;CG18…
5kbUpTx	cnc_w005	hocomoco__FOS_HUMAN.H10MO.A	5.36	0.0801	cnc	*	kay (inferredBy_Orthology).	Jra (inferredBy_MotifSimilarity). cnc; mor (inferredBy_MotifSimilarity_n_Orthology).	359	4098	Act42A;AGO1;alpha-Est7;aop;Aps;Arp2;Arpc4;Atg17;Atg8a;Atg9;atl;bark;baz;be;Best1;betaggt-I;blow;Bsg;Btk29A;bun;CAP;capt;CenB1A;cert;CG10098;CG10103;CG10126;CG10413;CG10874;CG10916;CG10939;CG11050;CG11125;CG1146;CG11486;CG11537;CG12004;CG12163;CG12655;CG12730;CG13252;CG13698;CG13784;CG13907;CG13921;CG14073;CG15012;CG15098;CG15211;CG15611;CG1677;CG16791;CG17019;CG17574;CG17834;CG18659;CG18858;CG189…
5kbUpTx	cnc_w005	cisbp__M5589	5.34	0.0799	cnc	*		kay (inferredBy_MotifSimilarity). Jra; cnc (inferredBy_MotifSimilarity_n_Orthology).	380	4977	Acsl;Act42A;Adgf-A;AdipoR;AGO1;alpha-Est7;aop;Aps;Arp2;Arpc4;Atg17;Atg8a;bark;baz;be;Best1;blow;Bsg;Btk29A;bun;CAP;capt;cert;CG10077;CG10089;CG10098;CG10103;CG10126;CG10413;CG10874;CG10916;CG10939;CG1105;CG11050;CG11125;CG1146;CG11486;CG11791;CG12004;CG12163;CG12655;CG12730;CG13698;CG13784;CG13907;CG13921;CG14073;CG15012;CG15098;CG15211;CG1677;CG16791;CG17019;CG17574;CG17834;CG18659;CG1890;CG1943…
5kbUpTx	cnc_w005	taipale__NFE2_DBD_NATGASTCATN	5.33	0.0798	cnc	**	cnc (inferredBy_Orthology).	Jra; kay (inferredBy_MotifSimilarity_n_Orthology).	343	3806	Adar;AdipoR;AMPdeam;aop;Arp2;Asph;Atg17;bark;baz;be;Best1;blow;Bsg;Btk29A;bun;CAP;capt;ced-6;cert;CG10089;CG10098;CG10103;CG10126;CG10916;CG10939;CG1105;CG11050;CG11125;CG1146;CG11486;CG11537;CG11791;CG12004;CG12655;CG12730;CG13252;CG13698;CG13784;CG13907;CG13921;CG14073;CG14767;CG15012;CG15098;CG15211;CG16721;CG1677;CG16791;CG17019;CG17514;CG17574;CG17834;CG18659;CG1890;CG1943;CG2938;CG30159;CG3…
5kbUpTx	cnc_w005	taipale__JDP2_full_ATGASTCAT	5.33	0.0798	cnc	*		kay (inferredBy_MotifSimilarity). Jra; cnc (inferredBy_MotifSimilarity_n_Orthology).	393	4976	Acsl;Act42A;Adgf-A;AdipoR;AGO1;alpha-Est7;AMPdeam;aop;Arp2;Arpc4;Atg17;Atg8a;bark;baz;be;Best1;blow;Bsg;Btk29A;bun;CAP;capt;cert;CG10077;CG10089;CG10098;CG10103;CG10126;CG10413;CG10874;CG10916;CG10939;CG1105;CG11050;CG11125;CG11357;CG1146;CG11486;CG11537;CG11791;CG12004;CG12163;CG12655;CG12730;CG13252;CG13698;CG13784;CG13907;CG13921;CG14073;CG14767;CG15012;CG15098;CG15211;CG1677;CG16791;CG17019;C…
5kbUpTx	cnc_w005	transfac_pro__M04693	5.28	0.0794	cnc	*	kay (inferredBy_Orthology).	Jra (inferredBy_MotifSimilarity). NFAT; cnc (inferredBy_MotifSimilarity_n_Orthology).	391	4996	Act42A;Adar;AdipoR;AGO1;aop;Arp2;Arpc4;Atg17;Atg9;atl;bark;baz;Best1;blow;Bmcp;Bsg;Btk29A;bun;CalpA;CAP;capt;cdc14;cert;CG10098;CG10103;CG10126;CG10413;CG10874;CG10916;CG10939;CG1105;CG11050;CG11125;CG1146;CG11486;CG11537;CG11791;CG12004;CG12163;CG12655;CG12730;CG13252;CG13698;CG13784;CG13868;CG13907;CG13921;CG14073;CG15012;CG15098;CG15211;CG15611;CG1677;CG16791;CG17019;CG17574;CG17834;CG18659;CG…
5kbUpTx	cnc_w005	hocomoco__JUND_HUMAN.H10MO.A	5.25	0.0791	cnc	*	Jra (inferredBy_Orthology).	kay (inferredBy_MotifSimilarity). cnc (inferredBy_MotifSimilarity_n_Orthology).	282	2695	Act42A;AGO1;aop;Arp2;Arpc4;bark;baz;Best1;betaggt-I;blow;Bsg;Btk29A;bun;CAP;capt;CenB1A;cert;CG10098;CG10103;CG10126;CG10413;CG10874;CG10939;CG11050;CG11125;CG1146;CG12004;CG12163;CG13252;CG13698;CG13784;CG13907;CG13921;CG14073;CG15012;CG15098;CG15211;CG1677;CG16791;CG17019;CG17574;CG17834;CG18659;CG18858;CG1890;CG1943;CG2938;CG30423;CG31038;CG31324;CG31523;CG31694;CG31710;CG31729;CG32137;CG32369…
5kbUpTx	cnc_w005	cisbp__M4623	5.17	0.0784	cnc	*	Jra (inferredBy_Orthology).	kay (inferredBy_MotifSimilarity). cnc (inferredBy_MotifSimilarity_n_Orthology).	377	4570	Act42A;AGO1;alpha-Est7;AMPdeam;AnxB10;aop;Arp2;Atg17;Atg8a;atl;bark;baz;be;Best1;betaggt-I;blow;Bmcp;Bsg;Btk29A;bun;CAP;capt;CenB1A;cert;CG10098;CG10103;CG10126;CG10413;CG10874;CG10916;CG10939;CG11050;CG11125;CG11357;CG1146;CG11486;CG11791;CG12004;CG12163;CG12655;CG12730;CG13252;CG13698;CG13784;CG13907;CG13921;CG14073;CG14767;CG15012;CG15098;CG15211;CG15611;CG1572;CG1677;CG16791;CG17019;CG17574;C…
5kbUpTx	cnc_w005	taipale__JDP2_DBD_ATGASTCAT	5.17	0.0784	cnc	*		Jra; kay (inferredBy_MotifSimilarity). cnc (inferredBy_MotifSimilarity_n_Orthology).	376	4772	Act42A;Adgf-A;AdipoR;alpha-Est7;AMPdeam;aop;Arp2;Arpc4;Atg17;Atg8a;bark;baz;be;Best1;betaggt-I;blow;Bsg;Btk29A;bun;CAP;capt;cert;CG10098;CG10103;CG10126;CG10413;CG10874;CG10916;CG10939;CG1105;CG11050;CG11125;CG11357;CG1146;CG11486;CG11537;CG11791;CG12004;CG12655;CG12730;CG13698;CG13784;CG13907;CG13921;CG14073;CG15012;CG15098;CG15211;CG15309;CG1677;CG16791;CG17019;CG17574;CG17834;CG18659;CG1890;CG…
5kbUpTx	cnc_w005	cisbp__M4607	5.16	0.0783	cnc	*	kay (inferredBy_Orthology).	Jra (inferredBy_MotifSimilarity). cnc; maf-S (inferredBy_MotifSimilarity_n_Orthology).	387	4878	Act42A;Adar;Adgf-A;AGO1;alpha-Est7;AMPdeam;Ank;AnxB10;aop;Arp2;Atg17;atl;bark;baz;Best1;betaggt-I;blow;Bsg;Btk29A;bun;CAP;capt;cdc14;CenB1A;cert;CG10089;CG10098;CG10103;CG10126;CG10413;CG10874;CG10916;CG10939;CG11050;CG11125;CG11357;CG1146;CG11486;CG11537;CG11791;CG12004;CG12163;CG12655;CG12730;CG13252;CG13698;CG13784;CG13868;CG13907;CG13921;CG14073;CG14767;CG15012;CG15098;CG15211;CG15611;CG1572;…
5kbUpTx	cnc_w005	hocomoco__FOSB_HUMAN.H10MO.C	5.16	0.0783	cnc	*	kay (inferredBy_Orthology).	Jra (inferredBy_MotifSimilarity). cnc; mor (inferredBy_MotifSimilarity_n_Orthology).	391	4728	Acsl;Act42A;AGO1;alpha-Est7;AMPdeam;aop;Arp2;Arpc4;Asph;Atg17;Atg9;atl;bark;baz;be;Best1;betaggt-I;blow;Bmcp;Bsg;Btk29A;bun;CAP;capt;cathD;CenB1A;cert;CG10077;CG10089;CG10098;CG10103;CG10126;CG10413;CG10874;CG10916;CG10939;CG11050;CG11125;CG11357;CG1146;CG11486;CG11537;CG12004;CG12163;CG12581;CG12655;CG12730;CG13252;CG13698;CG13784;CG13868;CG13907;CG13921;CG14073;CG15012;CG15098;CG15211;CG15611;C…
5kbUpTx	cnc_w005	cisbp__M5659	5.14	0.0781	cnc	**	cnc (inferredBy_Orthology).	Jra; kay (inferredBy_MotifSimilarity_n_Orthology).	324	3591	Acsl;AGO1;AMPdeam;aop;Aps;Arp2;bark;baz;Best1;blow;Bsg;Btk29A;bun;CAP;capt;cert;CG10089;CG10098;CG10103;CG10126;CG10413;CG10874;CG10916;CG10939;CG11050;CG1146;CG11486;CG11537;CG12004;CG12655;CG1275;CG13698;CG13784;CG13907;CG13921;CG14073;CG14767;CG15012;CG15098;CG15211;CG1677;CG16791;CG17019;CG17574;CG17834;CG18659;CG1943;CG2938;CG30159;CG30377;CG30423;CG31038;CG31324;CG31523;CG31694;CG31729;CG32…
5kbUpTx	cnc_w005	cisbp__M5587	5.1	0.0778	cnc	*		Jra; kay (inferredBy_MotifSimilarity). cnc (inferredBy_MotifSimilarity_n_Orthology).	377	4920	Act42A;Adgf-A;AdipoR;AGO1;alpha-Est7;AMPdeam;aop;Arp2;Arpc4;Atg17;Atg8a;bark;baz;be;Best1;betaggt-I;blow;Bsg;Btk29A;bun;CAP;capt;cert;CG10077;CG10089;CG10098;CG10103;CG10126;CG10413;CG10874;CG10916;CG10939;CG1105;CG11050;CG11125;CG1146;CG11486;CG11791;CG12004;CG12655;CG12730;CG13698;CG13784;CG13907;CG13921;CG14073;CG15012;CG15098;CG15211;CG15309;CG1677;CG16791;CG17019;CG17574;CG17834;CG18659;CG18…
5kbUpTx	cnc_w005	cisbp__M6038	5.08	0.0776	cnc	*		kay (inferredBy_MotifSimilarity). Jra; cnc (inferredBy_MotifSimilarity_n_Orthology).	382	4629	Act42A;Adar;Adgf-A;AdipoR;AGO1;alpha-Est7;AMPdeam;aop;Arp2;Arpc4;Asph;Atg17;Atg8a;bark;baz;be;Best1;betaggt-I;blow;Bsg;Btk29A;bun;CAP;capt;CenB1A;cert;CG10089;CG10098;CG10103;CG10126;CG10413;CG10874;CG10916;CG10939;CG1105;CG11050;CG11125;CG11357;CG1146;CG11486;CG11791;CG12004;CG12163;CG12655;CG12730;CG13698;CG13784;CG13907;CG13921;CG14073;CG14767;CG15012;CG15211;CG1677;CG16791;CG17019;CG17574;CG1…
5kbUpTx	cnc_w005	taipale__Jdp2_DBD_ATGASTCAT_repr	5.07	0.0775	cnc	*		kay (inferredBy_MotifSimilarity). Jra; cnc (inferredBy_MotifSimilarity_n_Orthology).	400	4935	Act42A;Adar;Adgf-A;AdipoR;AGO1;alpha-Est7;AMPdeam;Ank;aop;Aps;Arp2;Arpc4;Asph;Atg17;Atg8a;bark;baz;be;Best1;blow;Bsg;Btk29A;bun;CAP;capt;cert;CG10089;CG10098;CG10103;CG10126;CG10413;CG10874;CG10916;CG10939;CG1105;CG11050;CG11125;CG11357;CG1146;CG11486;CG11537;CG11791;CG12004;CG12163;CG12655;CG12730;CG1275;CG13698;CG13784;CG13907;CG13921;CG14073;CG14767;CG15012;CG15098;CG15211;CG15611;CG1572;CG167…
5kbUpTx	cnc_w005	cisbp__M4608	5.06	0.0774	cnc	*	Jra (inferredBy_Orthology).	kay (inferredBy_MotifSimilarity). cnc (inferredBy_MotifSimilarity_n_Orthology).	397	4962	Acsl;Act42A;AdipoR;AGO1;alpha-Est7;AMPdeam;aop;Arp2;Arpc4;Atg17;Atg9;atl;bark;baz;be;Best1;betaggt-I;blow;Bmcp;Bsg;Btk29A;bun;CalpA;CAP;capt;cdc14;CenB1A;cert;CG10077;CG10098;CG10103;CG10126;CG10413;CG10874;CG10916;CG10939;CG11050;CG11125;CG11357;CG1146;CG11486;CG11537;CG11791;CG12004;CG12163;CG12581;CG12655;CG12730;CG13252;CG13698;CG13784;CG13868;CG13907;CG13921;CG14073;CG14767;CG15012;CG15098;C…
5kbUpTx	cnc_w005	cisbp__M6318	5.06	0.0774	cnc	*	Jra (inferredBy_Orthology).	kay (inferredBy_MotifSimilarity). cnc (inferredBy_MotifSimilarity_n_Orthology).	291	2886	Act42A;AGO1;aop;Arp2;Arpc4;bark;baz;Best1;betaggt-I;blow;Bsg;Btk29A;bun;CAP;capt;CenB1A;cert;CG10098;CG10103;CG10126;CG10413;CG10874;CG10939;CG11050;CG11125;CG1146;CG12004;CG12163;CG12655;CG12730;CG13252;CG13698;CG13784;CG13907;CG13921;CG14073;CG15012;CG15098;CG15211;CG1677;CG16791;CG17019;CG17574;CG17834;CG18659;CG18858;CG1890;CG1943;CG2938;CG30423;CG31038;CG31324;CG31523;CG31694;CG31710;CG31729…
5kbUpTx	cnc_w005	yetfasco__YIL056W_2091	4.92	0.0762	cnc	*		Jra; kay (inferredBy_MotifSimilarity). cnc; mor (inferredBy_MotifSimilarity_n_Orthology).	349	4214	Act42A;AdipoR;AGO1;AMPdeam;aop;Asph;Atg17;atl;bark;baz;Best1;betaggt-I;blow;Bmcp;Bsg;Btk29A;bun;CAP;capt;cdc14;cert;CG10077;CG10089;CG10098;CG10126;CG10413;CG10874;CG10916;CG10939;CG11050;CG11125;CG11357;CG11486;CG12004;CG12163;CG12581;CG12655;CG12730;CG13252;CG13698;CG13784;CG13868;CG13907;CG13921;CG14073;CG15012;CG15098;CG15211;CG15611;CG1677;CG16791;CG17019;CG17574;CG17834;CG18659;CG1890;CG194…
5kbUpTx	cnc_w005	homer__ATGACTCATC_AP-1	4.89	0.0759	cnc	*	Jra (inferredBy_Orthology).	kay (inferredBy_MotifSimilarity). cnc; maf-S; mor (inferredBy_MotifSimilarity_n_Orthology).	339	3753	Act42A;AGO1;AMPdeam;aop;Arp2;Arpc4;Asph;bark;baz;be;Best1;betaggt-I;blow;Bsg;Btk29A;bun;CAP;capt;CenB1A;cert;CG10098;CG10103;CG10126;CG10413;CG10916;CG10939;CG11050;CG11125;CG1146;CG11486;CG12004;CG12163;CG12581;CG12655;CG12730;CG13252;CG13698;CG13784;CG13907;CG13921;CG14073;CG15012;CG15098;CG15211;CG15611;CG1677;CG16791;CG17019;CG17574;CG17834;CG18659;CG18858;CG1890;CG1943;CG2938;CG30377;CG30423…
5kbUpTx	cnc_w005	cisbp__M4526	4.87	0.0757	cnc	*	mor (inferredBy_Orthology).	Jra; cnc; ewg; kay; maf-S; tj (inferredBy_MotifSimilarity_n_Orthology).	402	4983	Act42A;AGO1;alpha-Est7;AMPdeam;AnxB10;aop;Arp2;Arpc4;Asph;Atg17;atl;bark;baz;be;Best1;betaggt-I;blow;Bsg;Btk29A;bun;CAP;capt;cathD;cdc14;ced-6;CenB1A;cert;CG10098;CG10103;CG10126;CG10413;CG10874;CG10916;CG10939;CG11050;CG11125;CG11357;CG1146;CG11537;CG12004;CG12163;CG12581;CG12655;CG12730;CG13252;CG13698;CG13784;CG13868;CG13907;CG13921;CG14073;CG14767;CG15012;CG15098;CG15211;CG15611;CG1572;CG1672…
5kbUpTx	cnc_w005	yetfasco__YER064C_2094	4.85	0.0755	cnc	*		Jra; kay (inferredBy_MotifSimilarity). cnc (inferredBy_MotifSimilarity_n_Orthology).	366	4247	Act42A;AdipoR;AGO1;alpha-Est7;AMPdeam;aop;Aps;Arp2;Arpc4;Asph;Atg17;atl;bark;baz;Best1;betaggt-I;blow;Bmcp;Bsg;Btk29A;bun;CAP;capt;cert;CG10077;CG10089;CG10098;CG10103;CG10126;CG10413;CG10874;CG10916;CG10939;CG11050;CG11125;CG11357;CG1146;CG11486;CG11537;CG11791;CG12004;CG12163;CG12655;CG12730;CG13252;CG13698;CG13784;CG13907;CG13921;CG14073;CG14767;CG15012;CG15098;CG15211;CG1677;CG16791;CG17019;C…
5kbUpTx	cnc_w005	transfac_public__M00490	4.73	0.0745	cnc	**	cnc (inferredBy_Orthology).	Jra; kay (inferredBy_MotifSimilarity_n_Orthology).	359	4771	Acsl;Act42A;Adgf-A;AGO1;AnxB10;aop;Aps;Arp2;Asx;Atg17;atl;bark;baz;Best1;blow;Bmcp;Bsg;Btk29A;bun;CaMKI;CAP;capt;cert;CG10098;CG10126;CG10413;CG10874;CG10916;CG1105;CG11125;CG11357;CG1146;CG11537;CG12004;CG12163;CG12655;CG12730;CG13252;CG13698;CG13784;CG13907;CG13921;CG14073;CG14767;CG15012;CG15098;CG15211;CG15309;CG1677;CG16791;CG17019;CG17574;CG17834;CG18659;CG1890;CG1943;CG2938;CG30377;CG31038…
5kbUpTx	cnc_w005	cisbp__M4506	4.7	0.0742	cnc	*	Jra (inferredBy_Orthology).	kay (inferredBy_MotifSimilarity). cnc; mor (inferredBy_MotifSimilarity_n_Orthology).	389	4904	Act42A;AdipoR;AGO1;alpha-Est7;AMPdeam;AnxB10;aop;Aps;Arp2;Atg17;atl;bark;baz;be;Best1;betaggt-I;blow;Bsg;Btk29A;bun;CalpA;CAP;capt;cathD;cdc14;CenB1A;cert;CG10089;CG10098;CG10103;CG10126;CG10413;CG10874;CG10916;CG10939;CG11050;CG11125;CG11357;CG1146;CG11537;CG12004;CG12112;CG12163;CG12581;CG12655;CG12730;CG13252;CG13698;CG13784;CG13868;CG13907;CG13921;CG14073;CG14767;CG15012;CG15098;CG15211;CG156…
5kbUpTx	cnc_w005	hocomoco__JUN_HUMAN.H10MO.A	4.68	0.0741	cnc	*	Jra (inferredBy_Orthology).	kay (inferredBy_MotifSimilarity). cnc; mor (inferredBy_MotifSimilarity_n_Orthology).	317	3335	Acsl;Act42A;AGO1;aop;Arp2;Arpc4;atl;bark;baz;Best1;betaggt-I;blow;Bsg;Btk29A;bun;CalpA;CAP;capt;CenB1A;cert;CG10089;CG10098;CG10103;CG10126;CG10413;CG10874;CG10916;CG10939;CG11050;CG11125;CG1146;CG12004;CG12163;CG12655;CG12730;CG13698;CG13784;CG13868;CG13907;CG13921;CG14073;CG15012;CG15098;CG15211;CG1677;CG16791;CG17019;CG17574;CG17834;CG18659;CG18858;CG1890;CG1943;CG2938;CG30423;CG31038;CG31324;…
5kbUpTx	cnc_w005	cisbp__M6230	4.67	0.0739	cnc	*	kay (inferredBy_Orthology).	Jra; cnc; mor (inferredBy_MotifSimilarity_n_Orthology).	369	4559	Acsl;Act42A;Adgf-A;AdipoR;AGO1;AMPdeam;AnxB10;aop;Arp2;Arpc4;Atg17;Atg9;atl;bark;baz;be;Best1;betaggt-I;blow;Bsg;Btk29A;bun;CAP;capt;CenB1A;cert;CG10089;CG10098;CG10103;CG10126;CG10413;CG10874;CG10916;CG10939;CG11050;CG11125;CG1146;CG11537;CG12004;CG12163;CG12581;CG12655;CG12730;CG13252;CG13698;CG13784;CG13907;CG13921;CG14073;CG15012;CG15098;CG15211;CG15611;CG1572;CG1677;CG16791;CG17019;CG17574;C…
5kbUpTx	cnc_w005	hocomoco__FOSL2_MOUSE.H10MO.A	4.63	0.0736	cnc	*	kay (inferredBy_Orthology).	Jra; cnc; mor (inferredBy_MotifSimilarity_n_Orthology).	387	4956	Acsl;Act42A;Adar;Adgf-A;AdipoR;AGO1;AMPdeam;AnxB10;aop;Arp2;Arpc4;Atg17;Atg9;atl;bark;baz;be;Best1;betaggt-I;blow;Bsg;Btk29A;bun;CAP;capt;CenB1A;cert;CG10089;CG10098;CG10103;CG10126;CG10413;CG10874;CG10916;CG10939;CG1105;CG11050;CG11125;CG1146;CG11537;CG11791;CG12004;CG12163;CG12581;CG12655;CG12730;CG13252;CG13698;CG13784;CG13907;CG13921;CG14073;CG14767;CG15012;CG15098;CG15211;CG15611;CG1572;CG16…
5kbUpTx	cnc_w005	hocomoco__JUNB_HUMAN.H10MO.C	4.61	0.0734	cnc	*	Jra (inferredBy_Orthology).	cnc; kay; mor (inferredBy_MotifSimilarity_n_Orthology).	314	3414	Act42A;AGO1;aop;Arpc4;Atg17;atl;bark;baz;Best1;betaggt-I;blow;Bsg;Btk29A;bun;CAP;capt;cdc14;cert;CG10098;CG10126;CG10413;CG10916;CG10939;CG11050;CG11125;CG1146;CG12004;CG12163;CG12655;CG12730;CG13698;CG13784;CG13907;CG13921;CG14073;CG15012;CG15098;CG15211;CG15611;CG1677;CG16791;CG17574;CG17834;CG18659;CG1890;CG1943;CG2938;CG30154;CG30159;CG30423;CG31038;CG31324;CG31523;CG31694;CG31710;CG32137;CG3…
5kbUpTx	cnc_w005	cisbp__M2980	4.59	0.0733	cnc	**	cnc (inferredBy_Orthology).	Jra; kay (inferredBy_MotifSimilarity_n_Orthology).	315	3745	Acsl;Act42A;Adgf-A;AGO1;aop;Aps;Arp2;Atg17;atl;bark;baz;Best1;blow;Bsg;Btk29A;bun;CAP;capt;cert;CG10098;CG10126;CG10874;CG10916;CG11125;CG1146;CG11537;CG12655;CG13252;CG13698;CG13784;CG13907;CG13921;CG14073;CG15098;CG15211;CG1677;CG16791;CG17574;CG17834;CG18659;CG1890;CG1943;CG2938;CG31038;CG31324;CG31523;CG31694;CG31710;CG31729;CG32091;CG32137;CG32147;CG32365;CG32369;CG33144;CG33970;CG34417;CG35…
5kbUpTx	cnc_w005	cisbp__M6319	4.49	0.0723	cnc	*	Jra (inferredBy_Orthology).	kay (inferredBy_MotifSimilarity). cnc; mor (inferredBy_MotifSimilarity_n_Orthology).	323	3472	Acsl;Act42A;AGO1;aop;Arp2;Arpc4;atl;bark;baz;Best1;betaggt-I;blow;Bsg;Btk29A;bun;CalpA;CAP;capt;CenB1A;cert;CG10089;CG10098;CG10103;CG10126;CG10413;CG10874;CG10916;CG10939;CG11050;CG11125;CG1146;CG12004;CG12163;CG12655;CG12730;CG13698;CG13784;CG13868;CG13907;CG13921;CG14073;CG15012;CG15098;CG15211;CG1677;CG16791;CG17019;CG17574;CG17834;CG18659;CG18858;CG1890;CG1943;CG2938;CG30423;CG31038;CG31324;…
5kbUpTx	cnc_w005	cisbp__M2979	4.41	0.0716	cnc	**	cnc (inferredBy_Orthology).	Jra (inferredBy_MotifSimilarity_n_Orthology).	312	3489	Act42A;AGO1;alpha-Est7;AMPdeam;AnxB10;aop;Aps;Arp2;atl;bark;baz;Best1;betaggt-I;blow;Bsg;Btk29A;bun;CAP;capt;cert;CG10098;CG10126;CG10874;CG10916;CG10939;CG1105;CG11125;CG1146;CG11486;CG11537;CG11791;CG12004;CG12655;CG12730;CG13698;CG13784;CG13907;CG14073;CG14767;CG15012;CG15098;CG15211;CG15611;CG1677;CG16791;CG17574;CG17834;CG18659;CG1890;CG1943;CG2938;CG30377;CG30423;CG31038;CG31324;CG31523;CG3…
5kbUpTx	cnc_w005	yetfasco__YEL009C_1363	4.28	0.0705	cnc	*		Jra; kay (inferredBy_MotifSimilarity). NFAT; cnc; maf-S; tj (inferredBy_MotifSimilarity_n_Orthology).	298	3161	Acsl;Act42A;AGO1;aop;Arp2;Atg17;atl;bark;baz;Best1;betaggt-I;blow;Bmcp;Bsg;Btk29A;bun;CalpA;CAP;capt;CenB1A;cert;CG10077;CG10089;CG10098;CG10126;CG10413;CG10874;CG10939;CG11050;CG11125;CG1146;CG11486;CG12004;CG12655;CG12730;CG13252;CG13698;CG13784;CG13907;CG14073;CG15012;CG15211;CG15611;CG1677;CG16791;CG17574;CG17834;CG18659;CG1890;CG1943;CG2938;CG30377;CG30423;CG31038;CG31324;CG31523;CG31694;CG3…
5kbUpTx	cnc_w005	neph__UW.Motif.0001	4.09	0.0688	cnc	*		kay (inferredBy_MotifSimilarity). Jra; cnc (inferredBy_MotifSimilarity_n_Orthology).	258	2513	Acsl;Act42A;AGO1;aop;Arp2;Arpc4;bark;baz;Best1;betaggt-I;blow;Bsg;Btk29A;bun;CAP;capt;CenB1A;cert;CG10089;CG10098;CG10126;CG10413;CG10939;CG11050;CG11125;CG1146;CG12004;CG12163;CG12655;CG13252;CG13698;CG13784;CG13907;CG13921;CG14073;CG15012;CG1677;CG16791;CG17574;CG17834;CG18659;CG1890;CG1943;CG2938;CG30377;CG30423;CG31038;CG31324;CG31523;CG31694;CG31710;CG31729;CG32137;CG32365;CG32369;CG33970;CG…
5kbUpTx	cnc_w005	transfac_public__M00495	4.03	0.0682	cnc	**	cnc (inferredBy_Orthology).	Jra (inferredBy_MotifSimilarity_n_Orthology).	352	4499	Adgf-A;AGO1;alpha-Est7;AMPdeam;AnxB10;aop;Aps;Arp2;Arpc4;Asph;Asx;Atg17;atl;bark;baz;Best1;betaggt-I;blow;Bsg;Btk29A;bun;CAP;capt;cert;CG10089;CG10098;CG10126;CG10413;CG10874;CG10916;CG10939;CG1105;CG11050;CG11125;CG1146;CG11486;CG11537;CG11791;CG12004;CG12655;CG12730;CG13698;CG13784;CG13907;CG13921;CG14073;CG14767;CG15012;CG15098;CG15211;CG15611;CG1677;CG16791;CG17019;CG17574;CG17834;CG18659;CG1…
5kbUpTx	cnc_w005	swissregulon__hs__BACH2.p2	3.77	0.0659	cnc	**	cnc (inferredBy_Orthology).	Jra; kay; mor (inferredBy_MotifSimilarity_n_Orthology).	368	4457	Act42A;Adar;AGO1;AMPdeam;AnxB10;aop;Arp2;Arpc4;Asx;Atg17;atl;bark;baz;be;Best1;blow;Bsg;Btk29A;bun;CAP;capt;CenB1A;cert;CG10098;CG10126;CG10413;CG10874;CG10916;CG10939;CG1105;CG11050;CG11125;CG11357;CG1146;CG11537;CG12004;CG12163;CG12581;CG12655;CG12730;CG13698;CG13784;CG13868;CG13907;CG13921;CG14767;CG15012;CG15098;CG15211;CG15611;CG1572;CG1677;CG16791;CG17019;CG17574;CG17834;CG18659;CG18858;CG1…
5kbUpTx	cnc_w005	homer__NATGASTCABNN_Fosl2	3.45	0.0631	cnc	*	kay (inferredBy_Orthology).	Jra (inferredBy_MotifSimilarity). cnc; mor (inferredBy_MotifSimilarity_n_Orthology).	319	3649	Acsl;Act42A;AGO1;aop;Arp2;Asx;atl;bark;baz;Best1;betaggt-I;blow;Bsg;Btk29A;bun;CAP;capt;CenB1A;cert;CG10098;CG10126;CG10413;CG10874;CG10916;CG10939;CG11050;CG11125;CG1146;CG12004;CG12163;CG12655;CG12730;CG13252;CG13698;CG13907;CG13921;CG14073;CG15012;CG15098;CG15211;CG1677;CG16791;CG17574;CG17834;CG18659;CG18858;CG1890;CG1943;CG2938;CG30423;CG31038;CG31324;CG31523;CG31694;CG31710;CG31729;CG32137;…
5kbUpTx	cnc_w005	hocomoco__SMRC1_MOUSE.H10MO.B	3.44	0.0629	cnc	*	mor (inferredBy_Orthology).	Jra; cnc; ewg; kay; maf-S; tj (inferredBy_MotifSimilarity_n_Orthology).	383	4976	Act42A;AdipoR;AGO1;aop;Arp2;Arpc4;Asx;Atg17;atl;bark;baz;be;Best1;betaggt-I;blow;Bmcp;Bsg;Btk29A;bun;CalpA;CAP;capt;cdc14;CenB1A;cert;CG10089;CG10098;CG10103;CG10126;CG10413;CG10874;CG10916;CG10939;CG11050;CG11125;CG11357;CG1146;CG11486;CG11537;CG12004;CG12112;CG12163;CG12581;CG12655;CG12730;CG13252;CG13698;CG13784;CG13868;CG13907;CG13921;CG14073;CG15012;CG15098;CG15211;CG15611;CG1677;CG16791;CG1…
5kbUpTx	cnc_w005	cisbp__M6229	3.37	0.0623	cnc	*	kay (inferredBy_Orthology).	Jra; cnc; ewg; maf-S; tj (inferredBy_MotifSimilarity_n_Orthology).	292	3446	Act42A;AGO1;aop;Arp2;Asx;Atg17;atl;bark;baz;be;Best1;betaggt-I;blow;Bsg;Btk29A;bun;CAP;capt;cathD;CenB1A;cert;CG10089;CG10126;CG10874;CG11050;CG11125;CG11357;CG1146;CG12655;CG13698;CG13784;CG13907;CG13921;CG15611;CG1572;CG1677;CG16791;CG17574;CG17834;CG18659;CG18858;CG1890;CG1943;CG30377;CG30423;CG31038;CG31324;CG31523;CG31710;CG32137;CG32369;CG32767;CG33144;CG33970;CG34228;CG34417;CG3529;CG3638;…
5kbUpTx	cnc_w005	cisbp__M6467	3.36	0.0622	cnc	*	mor (inferredBy_Orthology).	Jra; cnc; ewg; kay; maf-S; tj (inferredBy_MotifSimilarity_n_Orthology).	285	2933	Act42A;AGO1;aop;Arpc4;atl;bark;baz;Best1;blow;Bsg;Btk29A;bun;CAP;capt;CenB1A;cert;CG10098;CG10126;CG10413;CG10916;CG11050;CG11125;CG1146;CG12004;CG12163;CG12730;CG13698;CG13784;CG13868;CG13907;CG13921;CG14073;CG15012;CG15098;CG15211;CG15611;CG1677;CG16791;CG17019;CG17574;CG17834;CG18659;CG1890;CG1943;CG2938;CG30423;CG31038;CG31324;CG31523;CG31694;CG31710;CG32137;CG32369;CG32767;CG33144;CG33970;CG…
5kbUpTx	cnc_w005	hocomoco__SMRC1_HUMAN.H10MO.D	3.11	0.06	cnc	*	mor (inferredBy_Orthology).	Jra; cnc; ewg; kay; maf-S; tj (inferredBy_MotifSimilarity_n_Orthology).	249	2691	Act42A;AGO1;aop;Asx;bark;baz;Best1;blow;Bsg;Btk29A;bun;CAP;capt;cdc14;cert;CG10098;CG10126;CG10413;CG11050;CG11125;CG1146;CG11486;CG12004;CG12655;CG12730;CG13698;CG13907;CG15012;CG15611;CG1572;CG1677;CG16791;CG17574;CG17834;CG18659;CG18858;CG1890;CG1943;CG2938;CG30423;CG31038;CG31324;CG31523;CG31710;CG32137;CG32365;CG32369;CG33144;CG33970;CG34228;CG34417;CG4025;CG4101;CG4199;CG42238;CG42524;CG426…
5kbUpTx	crc_w001	transfac_pro__M07678	3.42	0.0432	crc	**	crc (directAnnotation).	Atf-2; Atf3; CG44247; CrebA; CrebB; Jra; kay (inferredBy_MotifSimilarity). Xbp1 (inferredBy_MotifSimilarity_n_Orthology).	346	1530	14-3-3epsilon;Abi;Acsl;Adar;AGO2;Alg-2;ALiX;alpha-Est9;alpha-Spec;AMPdeam;Amph;AnxB9;aop;AP-1gamma;AP-2alpha;aPKC;apt;Argk;Arpc2;Asx;Atpalpha;beta-Spec;Bsg;bun;by;c11.1;C3G;Cam;Ccm3;CD98hc;cdc14;CdGAPr;CenB1A;CG10365;CG10395;CG10413;CG1105;CG11050;CG11357;CG11486;CG11791;CG12007;CG12065;CG12290;CG12384;CG12567;CG12945;CG13117;CG13124;CG13377;CG13868;CG13887;CG14207;CG14985;CG15012;CG15611;CG1572;…
5kbUpTx	crc_w001	cisbp__M4624	3.18	0.0419	crc	*	Jra (inferredBy_Orthology).	Atf-2; Atf3; Atf6; CG44247; CrebA; CrebB; REPTOR-BP; crc; kay (inferredBy_MotifSimilarity). Xbp1 (inferredBy_MotifSimilarity_n_Orthology).	392	1834	14-3-3zeta;Abi;Acsl;AdSS;Akt1;ALiX;alpha-Est9;alpha-Spec;AMPdeam;AnxB9;AP-2alpha;aPKC;apt;Arc1;Argk;Arp1;ASPP;Atpalpha;B4;baf;bbg;Best1;beta-Spec;blow;Bmcp;Bsg;bun;by;C3G;CalpA;Cam;CAP;Ccm3;CD98hc;cdc14;CenB1A;CG10089;CG10103;CG10353;CG10365;CG10413;CG10527;CG10939;CG1103;CG1105;CG1146;CG11486;CG12004;CG12065;CG12163;CG12290;CG12384;CG12945;CG13124;CG13192;CG13366;CG13868;CG13887;CG14207;CG14275;…
5kbUpTx	crc_w001	taipale__XBP1_DBD_GATGACGTCATC	3.13	0.0416	crc	*	Xbp1 (inferredBy_Orthology).	Atf-2; Atf3; Atf6; CG44247; CrebA; CrebB; Jra; crc; kay (inferredBy_MotifSimilarity).	131	495	14-3-3zeta;Abi;ALiX;alpha-Spec;Argk;Atpalpha;Bsg;bun;by;C3G;CAP;CD98hc;cdc14;CenB1A;CG10365;CG10413;CG11486;CG12384;CG12945;CG13868;CG13887;CG14985;CG15611;CG17746;CG18343;CG2698;CG30069;CG30377;CG30460;CG31650;CG32264;CG32369;CG32521;CG34417;CG3638;CG42673;CG43693;CG4393;CG44085;CG45049;CG45050;CG5065;CG5830;CG5946;CG6051;CG6231;CG8176;CG9005;CG9328;CG9932;CG9967;cora;cpo;CrebB;crp;Csk;cv-2;cv-c…
5kbUpTx	crc_w001	transfac_pro__M07684	3.12	0.0416	crc	*	Jra (directAnnotation).	Atf-2; Atf3; Atf6; CG44247; CrebA; CrebB; REPTOR-BP; crc; kay (inferredBy_MotifSimilarity). Xbp1 (inferredBy_MotifSimilarity_n_Orthology).	280	1228	14-3-3zeta;Abi;AdSS;Akt1;ALiX;alpha-Spec;AnxB9;AP-2alpha;Argk;Arp1;ASPP;Atpalpha;baf;bbg;Best1;beta-Spec;blow;Bmcp;Bsg;bun;by;C3G;CAP;Ccm3;CD98hc;cdc14;CenB1A;CG10103;CG10365;CG10413;CG10527;CG1103;CG1105;CG1146;CG11486;CG12065;CG12290;CG12384;CG12945;CG13117;CG13124;CG13868;CG13887;CG14207;CG14275;CG14478;CG14985;CG15083;CG15611;CG1572;CG1677;CG17508;CG17746;CG18343;CG18508;CG2218;CG2698;CG30069…
5kbUpTx	crc_w001	cisbp__M5952	3.11	0.0415	crc	*	Xbp1 (inferredBy_Orthology).	Atf-2; Atf3; Atf6; CG44247; CrebA; CrebB; Jra; crc; kay (inferredBy_MotifSimilarity).	213	903	14-3-3zeta;Abi;AdSS;Akt1;ALiX;alpha-Spec;AP-2alpha;apt;Argk;Atpalpha;beta-Spec;blow;Bsg;bun;by;C3G;Cam;CAP;CD98hc;cdc14;CenB1A;CG10103;CG10365;CG10413;CG1105;CG11486;CG12065;CG12290;CG12384;CG12945;CG13868;CG13887;CG14985;CG15611;CG1677;CG17508;CG17746;CG18343;CG2698;CG30069;CG30377;CG30460;CG31635;CG31650;CG32264;CG32369;CG32521;CG32982;CG33144;CG34417;CG3638;CG42258;CG42673;CG43066;CG43693;CG43…
5kbUpTx	crc_w001	taipale__Jdp2_DBD_NATGACGTCAYN	3.07	0.0413	crc	*		Atf-2; Atf3; Atf6; CG44247; CrebA; CrebB; Jra; REPTOR-BP; crc; kay (inferredBy_MotifSimilarity). Xbp1 (inferredBy_MotifSimilarity_n_Orthology).	287	1242	14-3-3zeta;Abi;AdSS;ALiX;alpha-Est9;alpha-Spec;AnxB9;AP-2alpha;Argk;Arp1;Atpalpha;baf;bbg;Best1;beta-Spec;Bmcp;Bsg;btsz;bun;by;C3G;CalpA;CAP;Ccm3;CD98hc;cdc14;CenB1A;CG10089;CG10103;CG10365;CG10413;CG10527;CG1103;CG1105;CG1146;CG11486;CG12065;CG12290;CG12384;CG12945;CG13124;CG13192;CG13868;CG13887;CG14207;CG14275;CG14478;CG14767;CG14985;CG15394;CG15611;CG1572;CG1677;CG17544;CG17746;CG18343;CG2218…
5kbUpTx	crc_w001	taipale__JDP2_DBD_NATGACGTCAYN	3.07	0.0413	crc	*		Atf-2; Atf3; Atf6; CG44247; CrebA; CrebB; Jra; REPTOR-BP; crc; kay (inferredBy_MotifSimilarity). Xbp1 (inferredBy_MotifSimilarity_n_Orthology).	496	2514	14-3-3zeta;Abi;Acsl;Act5C;AdSS;AGO1;Alg-2;ALiX;alpha-Est9;alpha-Spec;AMPdeam;AnxB9;AP-2alpha;aPKC;apt;Arc1;Argk;Arp1;ASPP;Atpalpha;aux;B4;baf;bbg;Best1;beta-Spec;blow;Bmcp;bou;Bsg;Btk29A;btsz;bun;by;C3G;Cad99C;CalpA;Cam;CAP;Ccm3;CD98hc;cdc14;cdi;CenB1A;Cf2;CG10089;CG10103;CG10353;CG10365;CG10413;CG10527;CG10939;CG1103;CG1105;CG11357;CG11378;CG1146;CG11486;CG11537;CG11791;CG12004;CG12065;CG12290;C…
5kbUpTx	crc_w001	taipale__JDP2_full_NATGACGTCAYN	3.04	0.0411	crc	*		Atf-2; Atf3; Atf6; CG44247; CrebA; CrebB; Jra; REPTOR-BP; crc; kay (inferredBy_MotifSimilarity). Xbp1 (inferredBy_MotifSimilarity_n_Orthology).	250	1056	14-3-3zeta;Abi;AdSS;alpha-Est9;alpha-Spec;AnxB9;AP-2alpha;Argk;Arp1;Atpalpha;baf;Best1;beta-Spec;Bmcp;Bsg;btsz;bun;by;C3G;CAP;Ccm3;CD98hc;cdc14;CenB1A;CG10089;CG10103;CG10365;CG10413;CG10527;CG1103;CG1105;CG1146;CG11486;CG12065;CG12290;CG12384;CG12945;CG13124;CG13868;CG13887;CG14207;CG14275;CG14478;CG14985;CG15394;CG15611;CG1572;CG1677;CG17544;CG17746;CG18343;CG2698;CG30069;CG30089;CG30377;CG3045…
5kbUpTx	crc_w001	transfac_pro__M07686	3.03	0.0411	crc	*	kay (directAnnotation).	Atf-2; Atf3; Atf6; CG44247; CrebA; CrebB; Jra; crc (inferredBy_MotifSimilarity). Xbp1 (inferredBy_MotifSimilarity_n_Orthology).	248	1092	14-3-3zeta;Abi;AdSS;Akt1;ALiX;alpha-Spec;AnxB9;AP-2alpha;Argk;Arp1;ASPP;Atpalpha;baf;bbg;beta-Spec;blow;Bsg;bun;by;C3G;CAP;Ccm3;CD98hc;cdc14;CenB1A;CG10103;CG10365;CG10413;CG10527;CG1105;CG1146;CG11486;CG12065;CG12290;CG12384;CG12945;CG13124;CG13192;CG13252;CG13868;CG13887;CG14207;CG14275;CG14478;CG14985;CG15083;CG15611;CG1572;CG1677;CG17508;CG17746;CG18343;CG2698;CG30069;CG30089;CG30377;CG30456;…
5kbUpTx	CrebA_top50perTarget	transfac_pro__M07678	3.22	0.049	CrebA	*	crc (directAnnotation).	Atf-2; Atf3; CG44247; CrebA; CrebB; Jra; kay (inferredBy_MotifSimilarity). Xbp1 (inferredBy_MotifSimilarity_n_Orthology).	121	1516	AP-1gamma;AP-2alpha;Argk;babo;by;Cam;Ccm3;CD98hc;cdc14;CG1105;CG11050;CG11486;CG13124;CG13377;CG15611;CG1572;CG17514;CG17715;CG30159;CG30414;CG30460;CG31121;CG31324;CG31729;CG31869;CG32521;CG32982;CG33774;CG40178;CG40191;CG42748;CG43658;CG43693;CG5065;CG5151;CG6218;CG6231;CG8177;CG8399;CG8671;CG9003;CG9304;CG9328;CG9338;CG9801;Chd64;CkIIalpha;cnc;cno;cpo;Csk;cv-2;Cyp12a4;DAAM;Dad;Dbp80;Dl;Doa;Eb1…
5kbUpTx	CrebA_w001	transfac_pro__M07678	3.35	0.0372	CrebA	*	crc (directAnnotation).	Atf-2; Atf3; CG44247; CrebA; CrebB; Jra; kay (inferredBy_MotifSimilarity). Xbp1 (inferredBy_MotifSimilarity_n_Orthology).	162	524	Abi;Alg-2;alpha-Est9;alpha-Spec;alphaTub84B;AMPdeam;AnxB9;AP-2alpha;aPKC;Argk;Arp10;Atpalpha;Bsg;bun;by;Cam;CanA-14F;Ccm3;CD98hc;cdc14;CenB1A;CG10337;CG10365;CG10413;CG1105;CG11486;CG11791;CG12065;CG12290;CG12384;CG12945;CG13124;CG13917;CG14985;CG15611;CG1677;CG17746;CG30069;CG3008;CG30159;CG31650;CG32369;CG32521;CG32850;CG32982;CG3638;CG42674;CG42748;CG43658;CG44085;CG5065;CG5151;CG6051;CG7029;C…
5kbUpTx	CrebB_top50	transfac_pro__M02048	5.36	0.146	CrebB	*		Atf-2; Atf3; Atf6; CG44247; CrebA; CrebB; Jra; crc; kay (inferredBy_MotifSimilarity). Xbp1 (inferredBy_MotifSimilarity_n_Orthology).	17	4047	CG10383;CG7130;ckn;cno;CrebB;dtn;gcl;IP3K1;koi;MESR3;Rab30;raw;RhoGAP92B;Rip11;Rok;stmA;tou
5kbUpTx	CrebB_top50	homer__ATGACGTCATCN_JunD	5.14	0.14	CrebB	*	Jra (inferredBy_Orthology).	Atf-2; Atf3; Atf6; CG44247; CrebA; CrebB; cnc; crc; kay (inferredBy_MotifSimilarity). Xbp1 (inferredBy_MotifSimilarity_n_Orthology).	8	619	CG10383;CrebB;gcl;IP3K1;koi;MESR3;raw;RhoGAP92B
5kbUpTx	CrebB_top50	hocomoco__ATF7_HUMAN.H10MO.D	5.02	0.138	CrebB	*		Atf-2; Atf3; Atf6; CG44247; CrebA; CrebB; Jra; REPTOR-BP; cnc; crc; kay (inferredBy_MotifSimilarity). Xbp1 (inferredBy_MotifSimilarity_n_Orthology).	17	2737	CG10383;ckn;cno;CrebB;dtn;gcl;IP3K1;Kdm2;Klp10A;koi;MESR3;Rab30;raw;RhoGAP92B;Rip11;Rok;stmA
5kbUpTx	CrebB_top50	cisbp__M4557	4.78	0.132	CrebB	*	Jra (inferredBy_Orthology).	Atf-2; Atf3; Atf6; CG44247; CrebA; CrebB; crc; kay (inferredBy_MotifSimilarity). Xbp1 (inferredBy_MotifSimilarity_n_Orthology).	13	1301	CG10383;ckn;CrebB;gcl;IP3K1;koi;MESR3;raw;RhoGAP92B;Rip11;Rok;stmA;tou
5kbUpTx	CrebB_top50	homer__ATGACGTCATCC_c-Jun-CRE	4.76	0.132	CrebB	*		Atf-2; Atf3; Atf6; CG44247; CrebA; CrebB; Jra; crc; kay (inferredBy_MotifSimilarity). Xbp1 (inferredBy_MotifSimilarity_n_Orthology).	12	1561	CG10383;ckn;CrebB;gcl;IP3K1;koi;MESR3;raw;RhoGAP92B;Rip11;Rok;stmA
5kbUpTx	CrebB_top50	taipale__JDP2_full_NATGACGTCAYN	4.64	0.129	CrebB	*		Atf-2; Atf3; Atf6; CG44247; CrebA; CrebB; Jra; REPTOR-BP; crc; kay (inferredBy_MotifSimilarity). Xbp1 (inferredBy_MotifSimilarity_n_Orthology).	8	513	CG10383;CrebB;gcl;IP3K1;koi;MESR3;raw;RhoGAP92B
5kbUpTx	CrebB_top50	factorbook__v-JUN	4.57	0.127	CrebB	*	Jra (inferredBy_Orthology).	Atf-2; Atf3; Atf6; CG44247; CrebA; CrebB; crc; kay (inferredBy_MotifSimilarity). Xbp1 (inferredBy_MotifSimilarity_n_Orthology).	17	2528	CG10383;ckn;CrebB;dtn;FASN1;gcl;IP3K1;Kdm2;koi;MESR3;Rab30;raw;RhoGAP92B;Rip11;Rok;stmA;tou
5kbUpTx	CrebB_top50	transfac_pro__M01600	4.53	0.126	CrebB	*		CrebB (inferredBy_MotifSimilarity_n_Orthology).	17	3655	CG10383;ckn;cno;CrebB;dtn;FASN1;gcl;IP3K1;Klp10A;koi;MESR3;Nep2;raw;RhoGAP92B;Rip11;stmA;tou
5kbUpTx	CrebB_top50	hocomoco__CREB5_HUMAN.H10MO.D	4.46	0.125	CrebB	*		Atf-2; Atf3; Atf6; CG44247; CG6272; CrebA; CrebB; Jra; REPTOR-BP; crc; kay (inferredBy_MotifSimilarity). Xbp1 (inferredBy_MotifSimilarity_n_Orthology).	19	4392	CG10383;CG5399;ckn;cno;CrebB;dtn;FASN1;gcl;IP3K1;Kdm2;Klp10A;koi;MESR3;raw;RhoGAP92B;Rip11;Rok;stmA;tou
5kbUpTx	CrebB_top50	stark__TGACGTCAT	4.46	0.125	CrebB	*	CrebA (directAnnotation).	Atf-2; Atf3; Atf6; CG44247; CrebB; Jra; REPTOR-BP; cnc; crc; kay (inferredBy_MotifSimilarity). Xbp1 (inferredBy_MotifSimilarity_n_Orthology).	17	3844	CG10383;ckn;cno;CrebB;dtn;gcl;IP3K1;Kdm2;Klp10A;koi;MESR3;raw;RhoGAP92B;Rip11;Rok;stmA;tou
5kbUpTx	CrebB_top50	taipale__Jdp2_DBD_NATGACGTCAYN	4.39	0.123	CrebB	*		Atf-2; Atf3; Atf6; CG44247; CrebA; CrebB; Jra; REPTOR-BP; crc; kay (inferredBy_MotifSimilarity). Xbp1 (inferredBy_MotifSimilarity_n_Orthology).	8	626	CG10383;CrebB;gcl;IP3K1;koi;MESR3;raw;RhoGAP92B
5kbUpTx	CrebB_top50	homer__NGRTGACGTCAY_Atf7	4.38	0.123	CrebB	*		Atf-2; Atf3; Atf6; CG44247; CrebA; CrebB; Jra; REPTOR-BP; crc; kay (inferredBy_MotifSimilarity). Xbp1 (inferredBy_MotifSimilarity_n_Orthology).	11	981	CG10383;ckn;CrebB;IP3K1;koi;MESR3;raw;RhoGAP92B;Rok;stmA;tou
5kbUpTx	CrebB_top50	taipale__Creb5_DBD_NATGACGTCAYN	4.38	0.123	CrebB	*		Atf-2; Atf3; Atf6; CG44247; CrebA; CrebB; Jra; REPTOR-BP; crc; kay (inferredBy_MotifSimilarity). Xbp1 (inferredBy_MotifSimilarity_n_Orthology).	8	662	CG10383;CrebB;gcl;IP3K1;koi;MESR3;raw;RhoGAP92B
5kbUpTx	CrebB_top50	cisbp__M5590	4.33	0.122	CrebB	*		Atf-2; Atf3; Atf6; CG44247; CrebA; CrebB; Jra; REPTOR-BP; crc; kay (inferredBy_MotifSimilarity). Xbp1 (inferredBy_MotifSimilarity_n_Orthology).	17	3226	CG10383;ckn;cno;CrebB;dtn;gcl;IP3K1;Kdm2;Klp10A;koi;MESR3;raw;RhoGAP92B;Rip11;Rok;stmA;tou
5kbUpTx	CrebB_top50	jaspar__MA1070.1	4.31	0.121	CrebB	*		Atf3; Atf6; CrebA; CrebB; Jra; kay (inferredBy_MotifSimilarity). E2f1; Xbp1 (inferredBy_MotifSimilarity_n_Orthology).	13	1832	CG10383;cno;CrebB;gcl;IP3K1;Klp10A;koi;MESR3;raw;RhoGAP92B;Rok;stmA;tou
5kbUpTx	CrebB_top50	cisbp__M0346	4.25	0.12	CrebB	*		Atf-2; Atf3; Atf6; CG44247; CrebA; CrebB; Jra; cnc; kay (inferredBy_MotifSimilarity). Xbp1 (inferredBy_MotifSimilarity_n_Orthology).	10	1130	CG10383;ckn;cno;CrebB;IP3K1;koi;MESR3;raw;RhoGAP92B;stmA
5kbUpTx	CrebB_top50	transfac_pro__M07574	4.24	0.12	CrebB	*		Atf3; Atf6; CrebA; CrebB; Jra; REPTOR-BP (inferredBy_MotifSimilarity).	10	1072	CG10383;cno;CrebB;gcl;IP3K1;koi;MESR3;raw;RhoGAP92B;stmA
5kbUpTx	CrebB_top50	cisbp__M0259	4.22	0.119	CrebB	*		Atf3; Atf6; CrebA; CrebB; Jra; kay (inferredBy_MotifSimilarity). E2f1; Xbp1 (inferredBy_MotifSimilarity_n_Orthology).	13	1832	CG10383;cno;CrebB;gcl;IP3K1;Klp10A;koi;MESR3;raw;RhoGAP92B;Rok;stmA;tou
5kbUpTx	CrebB_top50	transfac_pro__M07572	4.21	0.119	CrebB	*		Atf-2; Atf3; Atf6; CG44247; CrebA; CrebB; Jra; REPTOR-BP; cnc; crc; kay (inferredBy_MotifSimilarity). Xbp1 (inferredBy_MotifSimilarity_n_Orthology).	8	806	CG10383;CrebB;gcl;IP3K1;koi;MESR3;raw;RhoGAP92B
5kbUpTx	CrebB_top50	cisbp__M4624	4.17	0.118	CrebB	*	Jra (inferredBy_Orthology).	Atf-2; Atf3; Atf6; CG44247; CrebA; CrebB; REPTOR-BP; crc; kay (inferredBy_MotifSimilarity). Xbp1 (inferredBy_MotifSimilarity_n_Orthology).	14	1771	CG10383;ckn;CrebB;dtn;gcl;IP3K1;Kdm2;koi;MESR3;raw;RhoGAP92B;Rok;stmA;tou
5kbUpTx	CrebB_top50	cisbp__M5293	4.15	0.118	CrebB	*		Atf-2; Atf3; Atf6; CG44247; CrebA; CrebB; Jra; REPTOR-BP; kay (inferredBy_MotifSimilarity). Xbp1 (inferredBy_MotifSimilarity_n_Orthology).	18	3226	CG10383;ckn;cno;CrebB;dtn;FASN1;gcl;IP3K1;Kdm2;Klp10A;koi;MESR3;raw;RhoGAP92B;Rip11;Rok;stmA;tou
5kbUpTx	CrebB_top50	homer__NRRTGACGTCAT_Atf2	4.13	0.117	CrebB	*		Atf-2; Atf3; Atf6; CG44247; CrebA; CrebB; Jra; crc; kay (inferredBy_MotifSimilarity). Xbp1 (inferredBy_MotifSimilarity_n_Orthology).	14	1621	CG10383;ckn;cno;CrebB;gcl;IP3K1;koi;MESR3;raw;RhoGAP92B;Rip11;Rok;stmA;tou
5kbUpTx	CrebB_top50	flyfactorsurvey__Atf-2_SANGER_5_FBgn0050420	4.12	0.117	CrebB	*	CG44247 (directAnnotation).	Atf-2; Atf3; Atf6; CrebA; CrebB; Jra; crc; kay (inferredBy_MotifSimilarity). Xbp1 (inferredBy_MotifSimilarity_n_Orthology).	9	1301	CG10383;ckn;CrebB;IP3K1;koi;MESR3;raw;RhoGAP92B;stmA
5kbUpTx	CrebB_top50	hocomoco__ATF1_HUMAN.H10MO.B	4.11	0.117	CrebB	**	CrebB (inferredBy_Orthology).	Atf-2; Atf6; CG44247; CG6272; CrebA; Jra; REPTOR-BP; cnc; crc; kay (inferredBy_MotifSimilarity). Xbp1 (inferredBy_MotifSimilarity_n_Orthology).	19	3772	CG10383;CG7443;ckn;cno;CrebB;dtn;FASN1;gcl;IP3K1;Kdm2;Klp10A;koi;MESR3;Rab30;raw;RhoGAP92B;Rok;stmA;tou
5kbUpTx	CrebB_top50	transfac_public__M00036	4.1	0.116	CrebB	*		Atf-2; Atf3; Atf6; CG44247; CrebA; CrebB; Jra; kay (inferredBy_MotifSimilarity). Xbp1 (inferredBy_MotifSimilarity_n_Orthology).	16	2952	CG10383;ckn;cno;CrebB;dtn;gcl;IP3K1;Kdm2;koi;MESR3;raw;RhoGAP92B;Rip11;Rok;stmA;tou
5kbUpTx	CrebB_top50	cisbp__M6039	4.09	0.116	CrebB	*		Atf-2; Atf3; Atf6; CG44247; CrebA; CrebB; Jra; REPTOR-BP; crc; kay (inferredBy_MotifSimilarity). Xbp1 (inferredBy_MotifSimilarity_n_Orthology).	18	3625	CG10383;ckn;cno;CrebB;dtn;FASN1;gcl;IP3K1;Kdm2;Klp10A;koi;MESR3;raw;RhoGAP92B;Rip11;Rok;stmA;tou
5kbUpTx	CrebB_top50	transfac_pro__M04681	4.04	0.115	CrebB	*	Jra (inferredBy_Orthology).	Atf-2; Atf3; Atf6; CG44247; CrebA; CrebB; REPTOR-BP; cnc; kay (inferredBy_MotifSimilarity). Xbp1 (inferredBy_MotifSimilarity_n_Orthology).	16	2734	CG10383;ckn;cno;CrebB;dtn;gcl;IP3K1;Klp10A;koi;MESR3;raw;RhoGAP92B;Rip11;Rok;stmA;tou
5kbUpTx	CrebB_top50	cisbp__M5998	4.04	0.115	CrebB	*		Atf-2; Atf3; Atf6; CG44247; CrebA; CrebB; Jra; REPTOR-BP; crc; kay (inferredBy_MotifSimilarity). Xbp1 (inferredBy_MotifSimilarity_n_Orthology).	9	875	CG10383;CrebB;gcl;IP3K1;koi;MESR3;raw;RhoGAP92B;stmA
5kbUpTx	CrebB_top50	taipale__JDP2_DBD_NATGACGTCAYN	4.01	0.114	CrebB	*		Atf-2; Atf3; Atf6; CG44247; CrebA; CrebB; Jra; REPTOR-BP; crc; kay (inferredBy_MotifSimilarity). Xbp1 (inferredBy_MotifSimilarity_n_Orthology).	17	3708	CG10383;CG5399;ckn;cno;CrebB;gcl;IP3K1;Kdm2;Klp10A;koi;MESR3;raw;RhoGAP92B;Rip11;Rok;stmA;tou
5kbUpTx	CrebB_top50	transfac_pro__M07684	3.98	0.114	CrebB	*	Jra (directAnnotation).	Atf-2; Atf3; Atf6; CG44247; CrebA; CrebB; REPTOR-BP; crc; kay (inferredBy_MotifSimilarity). Xbp1 (inferredBy_MotifSimilarity_n_Orthology).	18	4047	CG10383;ckn;cno;CrebB;dtn;FASN1;gcl;IP3K1;Kdm2;Klp10A;koi;MESR3;raw;RhoGAP92B;Rip11;Rok;stmA;tou
5kbUpTx	CrebB_top50	swissregulon__hs__JUN.p2	3.93	0.112	CrebB	*	Jra (inferredBy_Orthology).	Atf-2; Atf3; Atf6; CG44247; CrebA; CrebB; crc; kay (inferredBy_MotifSimilarity). Xbp1 (inferredBy_MotifSimilarity_n_Orthology).	19	4852	CG10383;ckn;cno;CrebB;dtn;gcl;IP3K1;Kdm2;Klp10A;koi;MESR3;Nep2;Rab30;raw;RhoGAP92B;Rip11;Rok;stmA;tou
5kbUpTx	CrebB_top50	taipale__ATF7_DBD_NNATGACGTCATNN_repr	3.92	0.112	CrebB	*		Atf-2; Atf3; Atf6; CG44247; CrebA; CrebB; Jra; REPTOR-BP; kay (inferredBy_MotifSimilarity). Xbp1 (inferredBy_MotifSimilarity_n_Orthology).	19	4298	CG10383;CG5399;ckn;cno;CrebB;FASN1;gcl;IP3K1;Kdm2;Klp10A;koi;MESR3;Rab30;raw;RhoGAP92B;Rip11;Rok;stmA;tou
5kbUpTx	CrebB_top50	elemento__TGACGTCA	3.9	0.112	CrebB	*		Atf-2; Atf3; Atf6; CG44247; CrebA; CrebB; Jra; crc; kay (inferredBy_MotifSimilarity). Xbp1 (inferredBy_MotifSimilarity_n_Orthology).	15	2713	CG10383;ckn;cno;CrebB;dtn;gcl;IP3K1;Klp10A;koi;MESR3;raw;RhoGAP92B;Rip11;stmA;tou
5kbUpTx	CrebB_top50	transfac_pro__M02772	3.89	0.112	CrebB	*		Atf-2; Atf3; Atf6; CG44247; CrebA; CrebB; Jra; REPTOR-BP; kay (inferredBy_MotifSimilarity). Xbp1 (inferredBy_MotifSimilarity_n_Orthology).	17	2855	CG10383;ckn;cno;CrebB;dtn;gcl;IP3K1;Kdm2;Klp10A;koi;MESR3;raw;RhoGAP92B;Rip11;Rok;stmA;tou
5kbUpTx	CrebB_top50	cisbp__M0283	3.89	0.112	CrebB	*		Atf-2; Atf3; Atf6; CG44247; CrebA; CrebB; Jra; crc; kay (inferredBy_MotifSimilarity). Xbp1 (inferredBy_MotifSimilarity_n_Orthology).	15	2713	CG10383;ckn;cno;CrebB;dtn;gcl;IP3K1;Klp10A;koi;MESR3;raw;RhoGAP92B;Rip11;stmA;tou
5kbUpTx	CrebB_top50	cisbp__M6153	3.89	0.111	CrebB	*		Atf6; CrebB (inferredBy_MotifSimilarity_n_Orthology).	16	2611	CG10383;ckn;cno;CrebB;dtn;gcl;IP3K1;Kdm2;Klp10A;koi;MESR3;Rab30;raw;RhoGAP92B;Rok;tou
5kbUpTx	CrebB_top50	transfac_pro__M01586	3.86	0.111	CrebB	*		Atf-2; Atf3; Atf6; CG44247; CrebA; CrebB; Jra; crc; kay (inferredBy_MotifSimilarity). Xbp1 (inferredBy_MotifSimilarity_n_Orthology).	12	1320	CG10383;ckn;CrebB;gcl;IP3K1;Kdm2;koi;MESR3;raw;RhoGAP92B;Rok;tou
5kbUpTx	CrebB_top50	cisbp__M5323	3.82	0.11	CrebB	*		Atf-2; Atf3; Atf6; CG44247; CrebA; CrebB; Jra; kay (inferredBy_MotifSimilarity). Xbp1 (inferredBy_MotifSimilarity_n_Orthology).	15	2248	CG10383;ckn;CrebB;dtn;gcl;IP3K1;Kdm2;koi;MESR3;raw;RhoGAP92B;Rip11;Rok;stmA;tou
5kbUpTx	CrebB_top50	taipale__CREB3_full_NNRTGACGTCAYCN	3.81	0.11	CrebB	*		Atf-2; Atf3; Atf6; CG44247; CrebA; CrebB; Jra; kay (inferredBy_MotifSimilarity). Xbp1 (inferredBy_MotifSimilarity_n_Orthology).	15	2270	CG10383;ckn;CrebB;dtn;gcl;IP3K1;Kdm2;koi;MESR3;raw;RhoGAP92B;Rip11;Rok;stmA;tou
5kbUpTx	CrebB_top50	transfac_pro__M01863	3.81	0.11	CrebB	*		CrebB (inferredBy_MotifSimilarity_n_Orthology).	16	3006	CG10383;ckn;cno;CrebB;dtn;gcl;IP3K1;Kdm2;Klp10A;koi;MESR3;Rab30;raw;RhoGAP92B;Rok;tou
5kbUpTx	CrebB_top50	jaspar__MA0967.1	3.79	0.109	CrebB	*		Atf-2; Atf3; Atf6; CG44247; CrebA; CrebB; Jra; cnc; crc; kay (inferredBy_MotifSimilarity). Xbp1 (inferredBy_MotifSimilarity_n_Orthology).	12	1590	CG10383;ckn;cno;CrebB;gcl;IP3K1;koi;MESR3;raw;RhoGAP92B;stmA;tou
5kbUpTx	CrebB_top50	hocomoco__ATF3_HUMAN.H10MO.A	3.78	0.109	CrebB	*		Atf6; CrebB (inferredBy_MotifSimilarity_n_Orthology).	16	2638	CG10383;ckn;cno;CrebB;dtn;gcl;IP3K1;Kdm2;Klp10A;koi;MESR3;Rab30;raw;RhoGAP92B;Rok;tou
5kbUpTx	CrebB_top50	transfac_pro__M07668	3.76	0.108	CrebB	*	Atf-2; CG44247 (directAnnotation).	Atf3; CrebA; CrebB; Jra; crc; kay (inferredBy_MotifSimilarity). Xbp1 (inferredBy_MotifSimilarity_n_Orthology).	15	2968	CG10383;CG7443;ckn;CrebB;gcl;IP3K1;koi;MESR3;Rab30;raw;RhoGAP92B;Rip11;Rok;stmA;tou
5kbUpTx	CrebB_top50	taipale__BATF3_DBD_TGATGACGTCATCA	3.73	0.108	CrebB	*		Atf-2; Atf3; Atf6; CG44247; CrebA; CrebB; Jra; kay (inferredBy_MotifSimilarity). Xbp1 (inferredBy_MotifSimilarity_n_Orthology).	14	2488	CG10383;CG5399;ckn;CrebB;gcl;IP3K1;Kdm2;koi;MESR3;Rab30;raw;Rip11;Rok;tou
5kbUpTx	CrebB_top50	cisbp__M5588	3.71	0.107	CrebB	*		Atf-2; Atf3; Atf6; CG44247; CrebA; CrebB; Jra; REPTOR-BP; crc; kay (inferredBy_MotifSimilarity). Xbp1 (inferredBy_MotifSimilarity_n_Orthology).	17	3049	CG10383;ckn;cno;CrebB;dtn;gcl;IP3K1;Kdm2;Klp10A;koi;MESR3;raw;RhoGAP92B;Rip11;Rok;stmA;tou
5kbUpTx	CrebB_top50	cisbp__M5302	3.67	0.107	CrebB	*		Atf-2; Atf3; Atf6; CG44247; CrebA; CrebB; Jra; kay (inferredBy_MotifSimilarity). Xbp1 (inferredBy_MotifSimilarity_n_Orthology).	11	1012	CG10383;ckn;CrebB;dtn;gcl;IP3K1;Kdm2;koi;MESR3;raw;Rok
5kbUpTx	CrebB_top50	transfac_pro__M07686	3.63	0.105	CrebB	*	kay (directAnnotation).	Atf-2; Atf3; Atf6; CG44247; CrebA; CrebB; Jra; crc (inferredBy_MotifSimilarity). Xbp1 (inferredBy_MotifSimilarity_n_Orthology).	17	3338	CG10383;ckn;cno;CrebB;dtn;gcl;IP3K1;Kdm2;koi;MESR3;Rab30;raw;RhoGAP92B;Rip11;Rok;stmA;tou
5kbUpTx	CrebB_top50	cisbp__M4571	3.63	0.105	CrebB	*	Jra (inferredBy_Orthology).	Atf3; REPTOR-BP; kay (inferredBy_MotifSimilarity). CrebB; Xbp1 (inferredBy_MotifSimilarity_n_Orthology).	17	2611	CG10383;CG5399;CG7443;cno;CrebB;FASN1;gcl;IP3K1;Kdm2;koi;MESR3;Rab30;raw;RhoGAP92B;Rip11;Rok;tou
5kbUpTx	CrebB_top50	hocomoco__JDP2_HUMAN.H10MO.D	3.53	0.103	CrebB	*		Atf-2; Atf3; Atf6; CG44247; CrebA; CrebB; Jra; REPTOR-BP; cnc; crc; kay (inferredBy_MotifSimilarity). Xbp1 (inferredBy_MotifSimilarity_n_Orthology).	18	3507	CG10383;ckn;cno;CrebB;dtn;FASN1;gcl;IP3K1;Kdm2;Klp10A;koi;MESR3;raw;RhoGAP92B;Rip11;Rok;stmA;tou
5kbUpTx	CrebB_top50	cisbp__M4747	3.51	0.103	CrebB	*		Atf-2; Atf3; Atf6; CG44247; CrebA; CrebB; Jra; crc; kay (inferredBy_MotifSimilarity). Xbp1 (inferredBy_MotifSimilarity_n_Orthology).	13	2480	CG10383;ckn;cno;CrebB;gcl;IP3K1;koi;MESR3;raw;RhoGAP92B;Rok;stmA;tou
5kbUpTx	CrebB_top50	jaspar__MA0018.2	3.48	0.102	CrebB	**	CrebB (inferredBy_Orthology).	Atf3; CrebA; Jra (inferredBy_MotifSimilarity). Atf6; Xbp1 (inferredBy_MotifSimilarity_n_Orthology).	12	1561	CG10383;ckn;cno;CrebB;dtn;IP3K1;koi;MESR3;raw;RhoGAP92B;stmA;tou
5kbUpTx	CrebB_top50	jaspar__MA0286.1	3.48	0.102	CrebB	*		Atf3; REPTOR-BP (inferredBy_MotifSimilarity). Atf6; CrebB (inferredBy_MotifSimilarity_n_Orthology).	7	757	CG10383;CrebB;gcl;IP3K1;Klp10A;koi;raw
5kbUpTx	CrebB_top50	hocomoco__CREM_HUMAN.H10MO.C	3.48	0.102	CrebB	**	CrebB (inferredBy_Orthology).		16	4047	CG10383;ckn;cno;CrebB;dtn;gcl;IP3K1;Kdm2;koi;MESR3;raw;RhoGAP92B;Rip11;Rok;stmA;tou
5kbUpTx	CrebB_top50	cisbp__M2091	3.47	0.102	CrebB	*		Atf3; REPTOR-BP (inferredBy_MotifSimilarity). Atf6; CrebB (inferredBy_MotifSimilarity_n_Orthology).	7	739	CG10383;CrebB;gcl;IP3K1;Klp10A;koi;raw
5kbUpTx	CrebB_top50	cisbp__M4307	3.47	0.102	CrebB	*		Atf3; REPTOR-BP (inferredBy_MotifSimilarity). Atf6; CrebB (inferredBy_MotifSimilarity_n_Orthology).	7	784	CG10383;CrebB;gcl;IP3K1;Klp10A;koi;raw
5kbUpTx	CrebB_top50	transfac_pro__M01615	3.47	0.102	CrebB	*		Atf3; REPTOR-BP (inferredBy_MotifSimilarity). Atf6; CrebB (inferredBy_MotifSimilarity_n_Orthology).	7	784	CG10383;CrebB;gcl;IP3K1;Klp10A;koi;raw
5kbUpTx	CrebB_top50	yetfasco__YIL036W_585	3.46	0.102	CrebB	*		Atf3; REPTOR-BP (inferredBy_MotifSimilarity). Atf6; CrebB (inferredBy_MotifSimilarity_n_Orthology).	7	784	CG10383;CrebB;gcl;IP3K1;Klp10A;koi;raw
5kbUpTx	CrebB_top50	transfac_pro__M07680	3.45	0.101	CrebB	*	CrebA (directAnnotation).	Atf-2; Atf3; Atf6; CG44247; CrebB; Jra; crc; kay (inferredBy_MotifSimilarity). Xbp1 (inferredBy_MotifSimilarity_n_Orthology).	15	3226	CG10383;ckn;CrebB;dtn;gcl;IP3K1;Kdm2;koi;MESR3;raw;RhoGAP92B;Rip11;Rok;stmA;tou
5kbUpTx	CrebB_top50	jaspar__MA0609.1	3.45	0.101	CrebB	**	CrebB (inferredBy_Orthology).	vri (inferredBy_MotifSimilarity_n_Orthology).	4	246	CrebB;IP3K1;Klp10A;koi
5kbUpTx	CrebB_top50	transfac_pro__M07682	3.44	0.101	CrebB	**	CrebB (directAnnotation).	Atf-2; Atf3; Atf6; CG44247; CrebA; Jra; REPTOR-BP; cnc; crc; kay (inferredBy_MotifSimilarity). Xbp1 (inferredBy_MotifSimilarity_n_Orthology).	18	4047	CG10383;ckn;cno;CrebB;dtn;FASN1;gcl;IP3K1;Kdm2;Klp10A;koi;MESR3;raw;RhoGAP92B;Rip11;Rok;stmA;tou
5kbUpTx	CrebB_top50	transfac_pro__M07670	3.43	0.101	CrebB	*	Atf6 (directAnnotation).	Atf3; CG44247; CrebA; CrebB; Jra; REPTOR-BP; cnc; kay (inferredBy_MotifSimilarity). Xbp1 (inferredBy_MotifSimilarity_n_Orthology).	16	2670	CG10383;ckn;cno;CrebB;dtn;gcl;IP3K1;Kdm2;koi;MESR3;raw;RhoGAP92B;Rip11;Rok;stmA;tou
5kbUpTx	CrebB_top50	cisbp__M6181	3.42	0.101	CrebB	**	CrebB (inferredBy_Orthology).		10	1832	CG10383;CrebB;IP3K1;koi;MESR3;raw;RhoGAP92B;Rip11;stmA;tou
5kbUpTx	CrebB_top50	transfac_pro__M00916	3.4	0.1	CrebB	**	CrebB (inferredBy_Orthology).	Atf3 (inferredBy_MotifSimilarity).	15	2385	CG10383;ckn;CrebB;FASN1;gcl;IP3K1;Kdm2;koi;MESR3;raw;RhoGAP92B;Rip11;Rok;stmA;tou
5kbUpTx	CrebB_top50	jaspar__MA1069.1	3.34	0.0989	CrebB	*		Atf-2; Atf3; Atf6; CG44247; CrebA; CrebB; Jra; crc; kay (inferredBy_MotifSimilarity). Xbp1 (inferredBy_MotifSimilarity_n_Orthology).	16	4047	CG10383;ckn;cno;CrebB;dtn;gcl;IP3K1;Kdm2;Klp10A;koi;MESR3;raw;Rip11;Rok;stmA;tou
5kbUpTx	CrebB_top50	cisbp__M0319	3.33	0.0985	CrebB	**	CrebB (inferredBy_Orthology).	vri (inferredBy_MotifSimilarity_n_Orthology).	7	981	CG10383;CrebB;gcl;IP3K1;Klp10A;koi;raw
5kbUpTx	CrebB_top50	cisbp__M4092	3.31	0.098	CrebB	*		Atf-2; Atf3; Atf6; CG44247; CrebA; CrebB; Jra; kay (inferredBy_MotifSimilarity). Xbp1 (inferredBy_MotifSimilarity_n_Orthology).	15	2302	CG10383;ckn;cno;CrebB;dtn;gcl;IP3K1;Kdm2;koi;MESR3;raw;RhoGAP92B;Rip11;stmA;tou
5kbUpTx	CrebB_top50	cisbp__M0265	3.3	0.0979	CrebB	*		Atf-2; Atf3; Atf6; CG44247; CrebA; CrebB; Jra; crc; kay (inferredBy_MotifSimilarity). Xbp1 (inferredBy_MotifSimilarity_n_Orthology).	16	3655	CG10383;ckn;cno;CrebB;dtn;gcl;IP3K1;Klp10A;koi;MESR3;raw;RhoGAP92B;Rip11;Rok;stmA;tou
5kbUpTx	CrebB_top50	transfac_pro__M07666	3.29	0.0977	CrebB	*	Atf3 (directAnnotation).	Atf-2; Atf6; CG44247; CrebA; CrebB; Jra; REPTOR-BP; cnc; crc; kay (inferredBy_MotifSimilarity). E2f1; Xbp1 (inferredBy_MotifSimilarity_n_Orthology).	18	3464	CG10383;ckn;cno;CrebB;dtn;gcl;IP3K1;Kdm2;Klp10A;koi;MESR3;Rab30;raw;RhoGAP92B;Rip11;Rok;stmA;tou
5kbUpTx	CrebB_top50	transfac_public__M00039	3.29	0.0975	CrebB	**	CrebB (inferredBy_Orthology).	Atf3; REPTOR-BP (inferredBy_MotifSimilarity). Atf6; tj (inferredBy_MotifSimilarity_n_Orthology).	15	3625	CG10383;ckn;cno;CrebB;dtn;gcl;IP3K1;Klp10A;koi;MESR3;raw;RhoGAP92B;Rip11;stmA;tou
5kbUpTx	CrebB_top50	transfac_pro__M02738	3.27	0.0971	CrebB	**	CrebB (inferredBy_Orthology).	Atf-2; Atf3; Atf6; CG44247; CrebA; Jra; REPTOR-BP; kay (inferredBy_MotifSimilarity). Xbp1 (inferredBy_MotifSimilarity_n_Orthology).	17	3226	CG10383;ckn;cno;CrebB;dtn;gcl;IP3K1;Kdm2;Klp10A;koi;MESR3;raw;RhoGAP92B;Rip11;Rok;stmA;tou
5kbUpTx	CrebB_top50	hocomoco__ATF2_HUMAN.H10MO.B	3.26	0.0968	CrebB	*		Atf3; Atf6; CrebA; CrebB; REPTOR-BP (inferredBy_MotifSimilarity). Jra (inferredBy_MotifSimilarity_n_Orthology).	11	1391	CG10383;ckn;cno;CrebB;gcl;IP3K1;Klp10A;koi;MESR3;raw;RhoGAP92B
5kbUpTx	CrebB_top50	hocomoco__CREB1_HUMAN.H10MO.A	3.24	0.0966	CrebB	**	CrebB (inferredBy_Orthology).	Atf-2; Atf3; Atf6; CG44247; CrebA; Jra; kay (inferredBy_MotifSimilarity). Xbp1 (inferredBy_MotifSimilarity_n_Orthology).	20	4523	CG10383;CG5399;ckn;cno;CrebB;dtn;FASN1;gcl;IP3K1;Kdm2;Klp10A;koi;MESR3;Rab30;raw;RhoGAP92B;Rip11;Rok;stmA;tou
5kbUpTx	CrebB_top50	cisbp__M0362	3.24	0.0964	CrebB	*		Atf3; Atf6; CrebA; CrebB; Jra; REPTOR-BP; cnc; kay (inferredBy_MotifSimilarity). Xbp1 (inferredBy_MotifSimilarity_n_Orthology).	13	2091	CG10383;ckn;cno;CrebB;gcl;IP3K1;Klp10A;koi;MESR3;raw;RhoGAP92B;stmA;tou
5kbUpTx	CrebB_top50	transfac_pro__M07312	3.12	0.0938	CrebB	*		Atf3; CrebA; CrebB; REPTOR-BP (inferredBy_MotifSimilarity). Atf6; Jra (inferredBy_MotifSimilarity_n_Orthology).	16	2855	CG10383;ckn;cno;CrebB;gcl;IP3K1;Kdm2;Klp10A;koi;MESR3;raw;RhoGAP92B;Rip11;Rok;stmA;tou
5kbUpTx	CrebB_top50	cisbp__M3083	3.1	0.0933	CrebB	**	CrebB (inferredBy_Orthology).	Atf3; REPTOR-BP (inferredBy_MotifSimilarity). Atf6; tj (inferredBy_MotifSimilarity_n_Orthology).	15	3438	CG10383;ckn;cno;CrebB;dtn;gcl;IP3K1;Klp10A;koi;MESR3;raw;RhoGAP92B;Rip11;stmA;tou
5kbUpTx	CrebB_top50	cisbp__M0347	3.07	0.0926	CrebB	*		REPTOR-BP (inferredBy_MotifSimilarity). Atf6; CrebB (inferredBy_MotifSimilarity_n_Orthology).	14	2865	CG10383;ckn;cno;CrebB;gcl;IP3K1;Klp10A;koi;MESR3;raw;RhoGAP92B;Rip11;stmA;tou
5kbUpTx	CrebB_top50	homer__GATGACGTCA_Atf1	3.03	0.0917	CrebB	**	CrebB (inferredBy_Orthology).	Atf-2; Atf3; Atf6; CG44247; CrebA; Jra; crc; kay (inferredBy_MotifSimilarity). Xbp1 (inferredBy_MotifSimilarity_n_Orthology).	13	1666	CG10383;ckn;CrebB;dtn;gcl;IP3K1;Klp10A;koi;MESR3;raw;RhoGAP92B;stmA;tou
5kbUpTx	CrebB_top50	yetfasco__YER045C_8	3.02	0.0913	CrebB	*		REPTOR-BP (inferredBy_MotifSimilarity). CrebB (inferredBy_MotifSimilarity_n_Orthology).	18	4318	CG10383;ckn;cno;CrebB;dtn;gcl;IP3K1;Kdm2;Klp10A;koi;MESR3;Nep2;Rab30;raw;RhoGAP92B;Rip11;Rok;tou
5kbUpTx	CrebB_top50	transfac_pro__M07667	3	0.091	CrebB	*	REPTOR-BP (directAnnotation).	Atf3; Atf6; CrebA; CrebB; Jra; vri (inferredBy_MotifSimilarity).	11	1506	CG10383;ckn;cno;CrebB;gcl;IP3K1;Klp10A;koi;raw;RhoGAP92B;stmA
5kbUpTx	CrebB_w001	swissregulon__hs__JUN.p2	3.05	0.0549	CrebB	*	Jra (inferredBy_Orthology).	Atf-2; Atf3; Atf6; CG44247; CrebA; CrebB; crc; kay (inferredBy_MotifSimilarity). Xbp1 (inferredBy_MotifSimilarity_n_Orthology).	162	784	Abl;alpha-Spec;AnxB9;Arp1;ASPP;babo;beta-Spec;Bmcp;bun;CAP;cbt;cdc14;CenB1A;CG10103;CG10383;CG12290;CG12384;CG12945;CG13124;CG13366;CG13868;CG13887;CG14275;CG14767;CG17574;CG18343;CG30069;CG30089;CG30456;CG30460;CG32066;CG32264;CG32369;CG34383;CG34417;CG3638;CG42238;CG42673;CG4393;CG44085;CG45050;CG5059;CG5065;CG6051;CG6231;CG6959;CG7220;CG8839;CG9005;CG9328;CG9932;cher;CHES-1-like;coro;cpo;CrebA…
5kbUpTx	crol_top50	flyfactorsurvey__CG7368_SANGER_5_FBgn0036179	3.08	0.189	crol	*	CG7368 (directAnnotation).	crol; l(3)neo38 (inferredBy_MotifSimilarity).	14	649	apt;crol;ct;CtBP;ftz-f1;hdc;mamo;Moe;nej;RapGAP1;rho;robo2;spen;tna
5kbUpTx	crol_w005	flyfactorsurvey__CG7368_SANGER_5_FBgn0036179	3.07	0.123	crol	*	CG7368 (directAnnotation).	crol; l(3)neo38 (inferredBy_MotifSimilarity).	25	335	apt;CG32369;CG43736;ct;E2f1;ed;Eip63E;Eip74EF;fend;hdc;jim;kis;klu;l(3)neo38;mamo;mei-P26;Moe;nkd;RapGAP1;Rbfox1;rho;robo2;spen;tara;tna
5kbUpTx	crol_w005	predrem__nrMotif2527	3.04	0.122	crol	*		crol; l(3)neo38 (inferredBy_MotifSimilarity). Dp; Spps; cbt; peb (inferredBy_MotifSimilarity_n_Orthology).	51	1028	aop;Atf3;CG13117;CG13631;CG16791;CG32369;CG42240;CG5151;CHES-1-like;crol;ct;CycT;Dl;dpp;Drak;E2f1;ed;Egfr;Eip63E;Eip74EF;ena;Fur1;hdc;InR;jim;kis;klar;klu;l(3)L1231;l(3)neo38;mamo;mei-P26;nej;NFAT;nkd;Pura;pyd;RapGAP1;Rbfox1;rgn;rho;robo2;skd;spen;spri;Su(Tpl);tai;tara;tna;ttk;wac
5kbUpTx	crp_top50	cisbp__M2947	3.14	0.0998	crp	**	crp (inferredBy_Orthology).		8	1852	CG42268;crp;ec;geko;hdc;koi;NaPi-III;RecQ5
5kbUpTx	crp_top50perTarget	cisbp__M2947	4.13	0.0787	crp	**	crp (inferredBy_Orthology).		7	416	crp;dysc;geko;hdc;NaPi-III;sktl;Tsp26A
5kbUpTx	crp_top50perTarget	cisbp__M6513	3.08	0.0635	crp	**	crp (inferredBy_Orthology).		5	354	crp;dysc;ec;hdc;nahoda
5kbUpTx	CTCF_top50	predrem__nrMotif717	4.22	0.0488	CTCF	*		CTCF (inferredBy_MotifSimilarity_n_Orthology).	2	384	CG17065;scny
5kbUpTx	da_top50	flyfactorsurvey__l_1_sc_da_SANGER_5_FBgn0000413	4.49	0.12	da	**	da (directAnnotation).	ac; ase (inferredBy_MotifSimilarity).	11	2396	bark;bip1;CG18858;CG30456;da;Eip74EF;homer;Klp64D;Meltrin;spas;wnd
5kbUpTx	da_top50	cisbp__M5063	3.98	0.109	da	*		ac; ase; da (inferredBy_MotifSimilarity).	6	745	bark;bip1;CG18858;CG30456;Eip74EF;Meltrin
5kbUpTx	dl_w001	c2h2_zfs__M5280	3.91	0.0482	dl	*	Blimp-1 (inferredBy_Orthology).	Dif; dl (inferredBy_MotifSimilarity_n_Orthology).	199	701	Abl;Act5C;ago;Akap200;alpha-Spec;Arf79F;ASPP;Atpalpha;Baldspot;bark;bbg;betaTub97EF;brat;bru2;Bsg;bun;ced-6;CG10543;CG11137;CG1129;CG11486;CG13603;CG13907;CG14073;CG1677;CG16791;CG31635;CG32066;CG32264;CG32521;CG32767;CG33298;CG3638;CG3655;CG3726;CG42238;CG42524;CG42673;CG43658;CG43759;CG45050;CG5059;CG5151;CG5902;CG5953;CG6959;CG8031;CG8176;CG9005;CHES-1-like;Cip4;cnc;coro;cpo;CrebA;crol;crp;CtB…
5kbUpTx	dl_w001	cisbp__M6138	3.77	0.0473	dl	**	Dif; dl (inferredBy_Orthology).	Blimp-1; Mnt (inferredBy_MotifSimilarity_n_Orthology).	224	838	Abl;Actn;ago;Akap200;alpha-Spec;aop;ASPP;Baldspot;bark;baz;bbg;betaTub97EF;brat;bru2;Bsg;BtbVII;bun;ced-6;CenG1A;CG10479;CG10543;CG1129;CG13366;CG13603;CG13689;CG13907;CG14073;CG1677;CG16791;CG30089;CG31635;CG31808;CG32066;CG32264;CG32521;CG32767;CG3558;CG3638;CG3655;CG3726;CG42238;CG42524;CG42673;CG43658;CG43759;CG4496;CG45050;CG5059;CG5065;CG5151;CG5902;CG5953;CG6959;CG7600;CG8031;CG9005;CG9132…
5kbUpTx	dl_w001	cisbp__M2324	3.32	0.0447	dl	*		Dif; dl (inferredBy_MotifSimilarity_n_Orthology).	105	330	Abl;Akap200;alpha-Spec;aop;Arf79F;ASPP;bbg;brat;bun;CG10479;CG10543;CG11137;CG13366;CG13689;CG32521;CG32767;CG32772;CG3638;CG3655;CG3726;CG42238;CG42524;CG43759;CG5953;CG6959;CG8180;CG9132;CHES-1-like;CkIalpha;cnc;cpb;cpo;crol;cv-2;CycG;DAAM;Doa;E2f1;ed;Eip63E;Eip75B;elav;ena;fax;fend;fl(2)d;for;Glut4EF;heph;Hipk;hppy;Hr4;hts;Idgf3;Imp;InR;Inx3;jigr1;ken;kibra;klar;klu;kuz;lola;luna;mamo;mbl;mgl;…
5kbUpTx	dl_w001	jaspar__MA0528.1	3.12	0.0436	dl	*		Dif; dl (inferredBy_MotifSimilarity_n_Orthology).	86	258	Akap200;alpha-Spec;aop;Arf79F;ASPP;bbg;brat;bun;CG10479;CG10543;CG11137;CG13689;CG32521;CG32767;CG3655;CG3726;CG42238;CG42524;CG43759;CG5953;CG6959;CG8180;cnc;cpo;crol;cv-2;E2f1;ed;Eip63E;Eip75B;elav;ena;fax;fend;fl(2)d;for;Glut4EF;heph;Hipk;hppy;Hr4;hts;Idgf3;Imp;InR;Inx3;jigr1;ken;klar;klu;kuz;lola;luna;mamo;mbl;mgl;msn;mub;N;Pak3;Pka-C1;pnut;ps;psq;Ptp61F;puc;pum;RhoGAP19D;RhoGEF64C;rux;sbb;Sd…
5kbUpTx	dl_w001	hocomoco__MNT_HUMAN.H10MO.D	3.11	0.0434	dl	*	Mnt (inferredBy_Orthology).	Dif; dl (inferredBy_MotifSimilarity_n_Orthology).	120	398	Abl;AGO1;Akap200;alpha-Spec;Arf79F;ASPP;bark;brat;Bsg;bun;CenG1A;CG10543;CG11137;CG11486;CG13366;CG13689;CG14441;CG1677;CG16791;CG31176;CG32066;CG32264;CG32521;CG32767;CG32772;CG3655;CG42238;CG43658;CG43736;CG43759;CG45050;CG5953;CG6959;CG9005;CHES-1-like;cno;cpb;cpo;CrebB;crol;CtBP;CycG;CycT;DAAM;dally;DIP-iota;Dl;E2f1;ed;Eip63E;Eip93F;elav;fax;fend;fl(2)d;fs(1)h;ftz-f1;Glut4EF;heph;hid;Hipk;hts…
5kbUpTx	Dref_w001	homer__AVYTATCGATAD_DREF	8.1	0.0519	Dref	*		Dref; pnr (inferredBy_MotifSimilarity).	70	4983	AP-1sigma;ArfGAP1;Bap55;blp;bond;BuGZ;cg;CG10516;CG11030;CG11137;CG11180;CG11447;CG11781;CG12301;CG13671;CG14407;CG14683;CG15107;CG1628;CG17266;CG17593;CG1910;CG30108;CG3156;CG3337;CG3603;CG3909;CG4119;CG42359;CG4645;CG5037;CG7006;CG7382;CG8010;CG9667;Chrac-16;CycB;Dhx15;Dpy-30L1;Dref;Eaf6;inaE;kdn;l(3)neo43;lute;mRpL1;mRpL20;mRpL3;mRpL4;mRpL41;mRpS17;mRpS25;nero;nonA;Nup54;p47;Pabp2;Papss;pic;Rf…
5kbUpTx	Dref_w001	bergman__Dref	5.43	0.0368	Dref	**	Dref (directAnnotation).		63	4522	AP-1sigma;ArfGAP1;blp;BuGZ;cg;CG11137;CG11180;CG11447;CG11781;CG12301;CG13671;CG14407;CG14683;CG15107;CG1628;CG17266;CG17593;CG1910;CG30108;CG3156;CG3337;CG3909;CG4119;CG42359;CG4645;CG5037;CG7006;CG7382;CG8010;CG9667;Chrac-16;cue;CycB;Dhx15;Dpy-30L1;Dref;Eaf6;Gclm;inaE;kdn;l(3)neo43;Mo25;mRpL1;mRpL20;mRpL3;mRpL4;mRpS17;mRpS25;nero;nonA;Nup54;Pabp2;pic;RfC38;Rlb1;Rpn2;Sgt;sn;SRPK;Tgt;Usf;wdp;wmd
5kbUpTx	Dref_w001	transfac_pro__M00488	4.58	0.032	Dref	**	Dref (directAnnotation).		57	4123	ArfGAP1;Bap55;blp;BuGZ;cg;CG10516;CG11030;CG11137;CG11180;CG11447;CG11781;CG12301;CG13671;CG14407;CG14683;CG15107;CG1628;CG17266;CG1910;CG30108;CG3337;CG3909;CG4119;CG4645;CG7006;CG8010;CG9667;Chrac-16;CycB;Dpy-30L1;Dref;Eaf6;inaE;kdn;lute;Mo25;mRpL1;mRpL20;mRpL4;mRpS17;mRpS25;nemy;nero;nonA;p47;Pabp2;Papss;pic;Rlb1;RpII33;Rpn2;Sgt;sn;SRPK;Taf10b;VhaSFD;wdp
5kbUpTx	Dref_w001	flyfactorsurvey__Dref_FlyReg_FBgn0015664	4.17	0.0296	Dref	**	Dref (directAnnotation).		66	4924	AP-1sigma;ArfGAP1;Bap55;blp;BuGZ;cg;CG11030;CG11137;CG11180;CG11447;CG11781;CG12301;CG13671;CG14407;CG14683;CG15107;CG1628;CG17266;CG17593;CG1910;CG3156;CG3337;CG3909;CG4119;CG42359;CG4645;CG5037;CG7006;CG7382;CG8010;CG9667;Chrac-16;cue;CycB;Dhx15;Dpy-30L1;Dref;Eaf6;inaE;kdn;l(3)neo43;lute;mRpL1;mRpL20;mRpL3;mRpL4;mRpL41;mRpS17;nero;nonA;Nup54;p47;Pabp2;Papss;pic;RfC38;RpII33;Rpn2;Sgt;SmD3;sn;SRP…
5kbUpTx	Dref_w001	cisbp__M4924	4.05	0.029	Dref	**	Dref (directAnnotation).		62	4857	AP-1sigma;ArfGAP1;Bap55;blp;bond;BuGZ;cg;CG11030;CG11137;CG11180;CG12301;CG13671;CG14683;CG15107;CG1628;CG17266;CG1910;CG3156;CG3337;CG3909;CG4119;CG42359;CG4645;CG5037;CG5326;CG7006;CG7382;CG7639;CG8010;CG9667;Chrac-16;cue;CycB;Dhx15;Dpy-30L1;Dref;Gclm;inaE;kdn;l(3)neo43;lute;mRpL1;mRpL20;mRpL27;mRpL4;mRpS17;nero;nonA;Nup54;Pabp2;Papss;pic;RpII33;Rpn2;Sgt;sn;Spt6;SRPK;TFAM;Usf;wdp;wmd
5kbUpTx	E(bx)_w001	swissregulon__hs__BPTF.p2	4.49	0.0931	E(bx)	**	E(bx) (inferredBy_Orthology).		68	775	AGO1;aop;Atpalpha;Btk29A;CadN;CG16791;CG2865;CG32264;CG32369;CG32767;CG43658;CG43759;CG5953;chb;CHES-1-like;cnc;cno;CrebB;ct;cv-2;cwo;Diap1;Dsp1;E(Pc);EcR;Fas2;fs(1)h;ftz-f1;glec;GlyS;hdc;heph;how;InR;jvl;klar;Klp98A;klu;kst;LanB2;lola;mamo;mei-P26;msi;Ncoa6;Ndfip;numb;ogre;Pdcd4;Pdp1;Prosap;ps;pum;pyd;RapGAP1;REPTOR;sbb;scrib;sgg;sky;Sxl;Tis11;tou;trol;trx;ttk;tun;Unr
5kbUpTx	E(bx)_w001	tfdimers__MD00558	3.6	0.0824	E(bx)	**	E(bx) (inferredBy_Orthology).		105	1593	AGO1;aop;Atpalpha;B52;Btk29A;CadN;CG10479;CG16791;CG2865;CG2924;CG31635;CG31729;CG32264;CG32369;CG32767;CG42797;CG43658;CG43759;CG5399;CG5953;CG6398;chb;CHES-1-like;cnc;cno;CrebB;crol;ct;cv-2;cwo;Diap1;Dl;dlg1;Dp1;Dsp1;E(Pc);EcR;Fas2;fs(1)h;ftz-f1;Ggamma1;glec;GlyS;hdc;heph;HnRNP-K;how;Hrb27C;InR;jumu;jvl;kis;klar;Klp98A;klu;kst;l(1)G0193;LamC;LanB2;LIMK1;Lk6;lola;mamo;Mapmodulin;mei-P26;Mp;msi;N…
5kbUpTx	E(bx)_w001	cisbp__M3234	3.57	0.082	E(bx)	**	E(bx) (inferredBy_Orthology).		56	615	aop;Atpalpha;Btk29A;CadN;CG16791;CG2865;CG32264;CG32369;CG32767;CG43658;CG43759;CG5953;CHES-1-like;cnc;cno;CrebB;ct;cv-2;cwo;Diap1;Dl;Dsp1;E(Pc);Fas2;ftz-f1;hdc;heph;how;InR;jvl;klar;klu;kst;lola;mamo;mei-P26;msi;numb;Pdp1;Prosap;ps;pum;RapGAP1;REPTOR;robo2;sbb;scrib;sgg;SRPK;Sxl;tna;trol;trx;ttk;tun;Unr
5kbUpTx	E(bx)_w001	transfac_public__M00456	3.55	0.0818	E(bx)	**	E(bx) (inferredBy_Orthology).		67	854	AGO1;aop;Atpalpha;Btk29A;CadN;CG13917;CG16791;CG2865;CG32264;CG32369;CG32767;CG43658;CG43759;CG5953;chb;CHES-1-like;cnc;cno;CrebB;ct;cv-2;cwo;Diap1;Dl;Dsp1;E(Pc);EcR;Fas2;fs(1)h;ftz-f1;glec;GlyS;hdc;heph;how;InR;jvl;klar;klu;kst;LanB2;lola;mamo;mei-P26;msi;numb;Pdcd4;Pdp1;Prosap;ps;pum;RapGAP1;REPTOR;rgn;robo2;sbb;scrib;sgg;SRPK;Sxl;Tis11;tna;trol;trx;ttk;tun;Unr
5kbUpTx	E(bx)_w001	hocomoco__BPTF_HUMAN.H10MO.D	3.04	0.0757	E(bx)	**	E(bx) (inferredBy_Orthology).		91	1389	AGO1;aop;Aps;Atpalpha;Btk29A;CadN;CG13917;CG16791;CG2865;CG2924;CG31729;CG32264;CG32369;CG32767;CG43658;CG43759;CG5953;chb;CHES-1-like;cnc;cno;CrebB;ct;cv-2;cwo;Diap1;Dl;dlg1;Dsp1;E(Pc);EcR;Fas2;fl(2)d;fs(1)h;ftz-f1;glec;GlyS;hdc;heph;how;InR;jvl;klar;Klp98A;klu;Kr-h1;kst;l(1)G0193;LanB2;Lk6;lola;mamo;Mapmodulin;mei-P26;msi;mts;Ndfip;numb;Pdcd4;Pdp1;Pka-R2;Pkn;Prosap;ps;Psc;pum;pyd;RapGAP1;REPTOR…
5kbUpTx	E2f1_top50	transfac_pro__M04746	3.18	0.0992	E2f1	**	E2f1 (inferredBy_Orthology).	Atf3 (inferredBy_MotifSimilarity). CrebB (inferredBy_MotifSimilarity_n_Orthology).	13	2162	Abl;CG15394;CG1764;dpp;E2f1;Gk2;Gprk2;mgl;PGRP-LA;Smr;tou;wde;yellow-c
5kbUpTx	EcR_top50	hocomoco__PPARG_HUMAN.H10MO.A	3.31	0.124	EcR	*		Hnf4 (inferredBy_MotifSimilarity). EcR; Hr78; svp; usp (inferredBy_MotifSimilarity_n_Orthology).	3	79	CG32137;EcR;KCNQ
5kbUpTx	EcR_top50perTarget	hocomoco__PPARG_HUMAN.H10MO.A	3.43	0.129	EcR	*		Hnf4 (inferredBy_MotifSimilarity). EcR; Hr78; svp; usp (inferredBy_MotifSimilarity_n_Orthology).	3	78	CG32137;EcR;KCNQ
5kbUpTx	emc_top10perTarget	cisbp__M0186	4.11	0.0278	emc	*		da; sc (inferredBy_MotifSimilarity). emc; grn; zfh1 (inferredBy_MotifSimilarity_n_Orthology).	46	4386	ana;aralar1;beta4GalT7;bond;CG11180;CG11398;CG11444;CG11563;CG13992;CG1542;CG17816;CG31549;CG3902;CG4629;CG4806;CG5326;CG5645;CG5885;CG6724;CG6937;CG7246;CG8461;CG8545;CG8607;CG9286;CG9300;DppIII;emc;Gdi;hng3;Hsc70-3;l(1)G0289;l(2)k09848;Mat89Ba;Mp20;mRpS23;Pih1D1;Pino;Rbm13;Rtnl1;SelR;Smyd5;SsRbeta;Tapdelta;Uba5;wcd
5kbUpTx	emc_top50perTarget	cisbp__M4643	3.17	0.0164	emc	*	Myc (inferredBy_Orthology).	Clk; Eno; Hesr; Hey; Max; Mitf; Mnt; Mondo; Oli; cyc; emc (inferredBy_MotifSimilarity_n_Orthology).	292	2250	14-3-3zeta;Act57B;AdenoK;Adk1;Adk3;AdSS;akirin;ana;aralar1;ArfGAP1;Atpalpha;ATPsynC;ben;beta-PheRS;bic;Bka;blw;br;bru1;bru2;bur;bys;Cad86C;Cam;CG10341;CG10565;CG10576;CG10903;CG11030;CG11089;CG11180;CG11200;CG11267;CG11334;CG11417;CG1142;CG11555;CG11563;CG12091;CG12128;CG12134;CG12499;CG12773;CG13096;CG13097;CG13185;CG14210;CG14230;CG15027;CG1542;CG15529;CG15561;CG1671;CG1703;CG17124;CG17776;CG17…
5kbUpTx	emc_w001	cisbp__M4643	3.19	0.0165	emc	*	Myc (inferredBy_Orthology).	Clk; Eno; Hesr; Hey; Max; Mitf; Mnt; Mondo; Oli; cyc; emc (inferredBy_MotifSimilarity_n_Orthology).	294	2250	14-3-3zeta;Act57B;AdenoK;Adk1;Adk3;AdSS;akirin;ana;aralar1;ArfGAP1;Atpalpha;ATPsynC;ben;beta-PheRS;bic;Bka;blw;br;bru1;bru2;bur;bys;Cad86C;Cam;CG10341;CG10565;CG10576;CG10903;CG11030;CG11089;CG11180;CG11200;CG11267;CG11334;CG11417;CG1142;CG11555;CG11563;CG12091;CG12128;CG12134;CG12499;CG12773;CG13096;CG13097;CG13185;CG14210;CG14230;CG15027;CG1542;CG15529;CG15561;CG1671;CG1703;CG17124;CG17776;CG17…
5kbUpTx	emc_w005	cisbp__M4643	3.19	0.0161	emc	*	Myc (inferredBy_Orthology).	Clk; Eno; Hesr; Hey; Max; Mitf; Mnt; Mondo; Oli; cyc; emc (inferredBy_MotifSimilarity_n_Orthology).	464	4098	Aatf;Act57B;AdenoK;Adk3;AdSS;akirin;Alp4;ana;aralar1;ArfGAP1;ast;Atpalpha;ATPsynC;B52;babos;bcn92;ben;beta-PheRS;beta4GalT7;bic;BicD;Bka;Blos1;blp;blw;boca;bond;br;brk;bru1;bru2;BuGZ;bur;bys;Calr;cbc;cbt;CG10189;CG10336;CG10341;CG10343;CG10344;CG10565;CG10576;CG10903;CG11007;CG11030;CG11123;CG11180;CG11200;CG11267;CG11334;CG11417;CG1142;CG11444;CG11555;CG11563;CG12054;CG12091;CG12128;CG12134;CG12…
5kbUpTx	ERR_w005	transfac_pro__M07957	3.68	0.058	ERR	**	ERR (directAnnotation).	Hr39; ftz-f1 (inferredBy_MotifSimilarity).	14	4514	alpha-Est10;Cerk;CG10365;CG11882;CG13907;CG14696;CG17597;CG18622;CG44085;CG5853;CG5973;Drat;Gfat1;Pi3K21B
5kbUpTx	ERR_w005	transfac_pro__M08809	3.66	0.0577	ERR	**	ERR (inferredBy_Orthology).	ftz-f1; usp (inferredBy_MotifSimilarity_n_Orthology).	12	3661	Cerk;CG10365;CG11882;CG13907;CG18622;CG30197;CG44085;CG5973;Drat;Gfat1;Mct1;Pi3K21B
5kbUpTx	ERR_w005	hocomoco__NR5A2_MOUSE.H10MO.A	3.66	0.0577	ERR	*	ftz-f1 (inferredBy_Orthology).	ERR; usp (inferredBy_MotifSimilarity_n_Orthology).	15	4543	Cerk;CG10365;CG11882;CG14696;CG18622;CG1998;CG30197;CG44085;CG5853;CG5958;CG5973;Drat;Gfat1;Mct1;Pi3K21B
5kbUpTx	ERR_w005	homer__TTCAAGGTCA_Nr5a2	3.42	0.0544	ERR	*	ftz-f1 (inferredBy_Orthology).	ERR; Hr4; usp (inferredBy_MotifSimilarity_n_Orthology).	14	4850	Cerk;CG10365;CG11882;CG14696;CG18622;CG1998;CG30197;CG44085;CG5853;CG5973;Drat;Gfat1;Mct1;Pi3K21B
5kbUpTx	ERR_w005	cisbp__M6396	3.2	0.0514	ERR	*	ftz-f1 (inferredBy_Orthology).	ERR (inferredBy_MotifSimilarity_n_Orthology).	6	2006	Cerk;CG10365;CG11882;CG44085;CG5973;Gfat1
5kbUpTx	ERR_w005	cisbp__M5407	3.14	0.0506	ERR	**	ERR (inferredBy_Orthology).	ftz-f1 (inferredBy_MotifSimilarity_n_Orthology).	15	4979	alpha-Est10;Cerk;CG10365;CG11882;CG13907;CG14696;CG18622;CG1998;CG44085;CG5853;CG5958;CG5973;Drat;Gfat1;Pi3K21B
5kbUpTx	ERR_w005	hocomoco__NR5A2_HUMAN.H10MO.C	3.09	0.0499	ERR	*	ftz-f1 (inferredBy_Orthology).	ERR (inferredBy_MotifSimilarity_n_Orthology).	2	205	CG44085;CG5973
5kbUpTx	FoxK_w001	yetfasco__YPR104C_2203	4.09	0.0724	FoxK	**	FoxK; bin; fd19B; slp1; slp2 (inferredBy_Orthology).		67	2403	Abl;aop;Axud1;br;CG10898;CG12091;CG13917;CG14478;CG1648;CG32425;CG42724;CG5969;CG6767;CG9328;cic;CLIP-190;cnc;CoRest;crol;ctp;CycT;D1;Dl;dpp;Dys;dysc;E2f1;ed;FoxK;ftz-f1;fus;Galphai;gish;Gp93;hdc;inc;jigr1;kis;klar;Klp10A;l(1)G0289;lolal;mahe;Mnt;nkd;Pdcd4;Pdp1;Pka-C1;Pkn;pnut;Pp1alpha-96A;puc;rgn;RhoGEF2;robl;Rox8;SCAP;scny;sina;skd;sm;Smr;stg;Su(Tpl);Taf4;TfIIA-S;vib
5kbUpTx	FoxK_w001	cisbp__M0754	4.06	0.0721	FoxK	**	FoxK; bin; fd19B; slp1; slp2 (inferredBy_Orthology).		79	3252	Abl;aop;Axud1;br;CG10898;CG12091;CG13917;CG14478;CG1648;CG31705;CG32425;CG42724;CG5969;CG6767;CG9328;cic;CLIP-190;cnc;CoRest;crol;ctp;CycT;D1;Dl;dpp;Dys;dysc;E2f1;ed;eIF5B;FoxK;ftz-f1;fus;Galphai;gish;Gp93;hdc;ifc;inc;jigr1;kis;klar;Klp10A;l(1)G0289;lolal;mahe;mew;Mnt;mRpS26;mxt;nkd;Pdcd4;Pdp1;Pep;Pka-C1;Pkn;pnut;Pp1alpha-96A;puc;rgn;RhoGEF2;robl;Rox8;SCAP;scny;SelD;sina;skd;sm;Smr;sra;stg;Su(Tpl…
5kbUpTx	FoxK_w001	cisbp__M0734	3.49	0.0658	FoxK	*	croc (inferredBy_Orthology).	bin; fd59A; fd64A; slp1 (inferredBy_MotifSimilarity). FoxK; FoxP; bs; fd96Ca; fd96Cb; fkh; foxo (inferredBy_MotifSimilarity_n_Orthology).	65	2662	Abl;aop;baz;br;CG10616;CG12091;CG13917;CG14478;CG42724;CG43313;CG6767;CG7920;CG9328;cic;CLIP-190;cnc;crol;ctp;CycT;Dl;dpp;Dys;dysc;ed;eIF5B;FoxK;ftz-f1;fus;gish;hdc;her;inc;jigr1;kis;klar;l(1)G0289;mahe;mew;Mnt;nkd;Pdcd4;Pdp1;Pka-C1;Pkn;pnut;Pp1alpha-96A;puc;Rap2l;rgn;RhoGEF2;robl;Rox8;scny;sina;skd;sm;Smr;stg;Su(Tpl);Taf4;TfIIA-S;Top1;Vha26;vib;Ziz
5kbUpTx	FoxK_w001	cisbp__M0732	3.09	0.0615	FoxK	*	croc (inferredBy_Orthology).	bin; fd59A; fd64A; slp1 (inferredBy_MotifSimilarity). FoxK; FoxP; bs; fd96Ca; fd96Cb; fkh; foxo (inferredBy_MotifSimilarity_n_Orthology).	62	2457	Abl;aop;baz;br;CG12091;CG13917;CG14478;CG42724;CG6767;CG7920;CG9328;cic;CLIP-190;cnc;crol;ctp;Dl;dpp;Dys;dysc;E2f1;ed;eIF5B;FoxK;ftz-f1;fus;gish;hdc;her;ifc;inc;jigr1;kis;l(1)G0289;mahe;mew;Mnt;nkd;Pdcd4;Pdp1;Pep;Pka-C1;Pkn;pnut;Pp1alpha-96A;puc;Rap2l;rgn;RhoGEF2;robl;Rox8;scny;sina;skd;sm;Smr;stg;Su(Tpl);Taf4;TfIIA-S;Vha26;Ziz
5kbUpTx	FoxK_w001	cisbp__M0757	3	0.0605	FoxK	*		CHES-1-like; bin; slp1 (inferredBy_MotifSimilarity). FoxK; FoxP; croc; fd102C; fd59A; fd64A; fkh; foxo (inferredBy_MotifSimilarity_n_Orthology).	64	2554	Abl;aop;br;CG12091;CG13917;CG14478;CG1648;CG42724;CG6767;CG7920;CG9328;cic;CLIP-190;cnc;crol;ctp;CycT;Dl;dpp;Dys;dysc;E2f1;ed;eIF5B;FoxK;ftz-f1;fus;gish;hdc;her;inc;kis;klar;l(1)G0289;lolal;mahe;mew;mip130;Mnt;nkd;Pdcd4;Pdp1;Pka-C1;Pkn;pnut;Pp1alpha-96A;puc;Rap2l;rgn;RhoGEF2;robl;Rox8;scny;sina;skd;sm;Smr;stg;Su(Tpl);Taf4;TfIIA-S;Top1;Vha26;Ziz
5kbUpTx	foxo_w001	transfac_pro__M01216	5.28	0.112	foxo	**	foxo; slp1 (inferredBy_Orthology).		156	982	aay;aop;Atg17;Atpalpha;ben;bif;br;brat;bun;CG11873;CG12054;CG12576;CG13868;CG13917;CG14478;CG15309;CG2865;CG32369;CG32486;CG32767;CG33298;CG33970;CG34401;CG34417;CG3726;CG45050;CG5059;CG5953;CG6231;CG6512;CG9005;CG9932;CHES-1-like;chrb;cic;cindr;CkIalpha;Clic;cnc;cpo;Crag;Crtc;Csk;ct;ctp;cv-2;cv-c;cwo;CycG;dally;Diap1;Dmtn;Dp1;Drak;Dyrk2;E2f1;ed;eIF5B;Eip63E;Eip75B;Eip93F;elav;Fas1;Fas2;fax;FER;f…
5kbUpTx	foxo_w001	transfac_pro__M07286	5.2	0.111	foxo	**	foxo (inferredBy_Orthology).	slp1 (inferredBy_MotifSimilarity_n_Orthology).	252	2443	14-3-3epsilon;a;aay;Abl;Actn;AGO1;akirin;alt;aop;Asph;Atg17;Atpalpha;ben;betaTub56D;betaTub60D;bif;Bmcp;br;brat;bun;Cdc42;CG10082;CG10283;CG11873;CG12004;CG12054;CG12065;CG12576;CG13868;CG14478;CG15309;CG17977;CG2865;CG31886;CG32369;CG32486;CG32767;CG33298;CG33970;CG34401;CG34417;CG3655;CG3726;CG42240;CG42674;CG4364;CG43658;CG45050;CG5059;CG5953;CG6115;CG6231;CG6512;CG6770;CG6959;CG7220;CG8034;CG…
5kbUpTx	foxo_w001	cisbp__M0741	5.01	0.109	foxo	*		foxo (inferredBy_MotifSimilarity_n_Orthology).	192	1433	a;aay;Actn;AhcyL1;aop;Atg17;Atpalpha;ben;betaTub56D;betaTub60D;bif;br;brat;bun;CG11873;CG12004;CG12054;CG12576;CG13784;CG13868;CG14478;CG15309;CG17977;CG2865;CG31908;CG32369;CG32486;CG32767;CG33298;CG33970;CG34417;CG3655;CG3726;CG42240;CG4364;CG45050;CG5059;CG5953;CG6051;CG6115;CG6231;CG6512;CG8177;CG9005;CG9932;CHES-1-like;chrb;cic;cindr;Clic;cnc;cpo;Crag;crb;crol;crp;Crtc;Csk;ct;ctp;cv-2;cv-c;c…
5kbUpTx	foxo_w001	transfac_pro__M03823	4.8	0.106	foxo	**	foxo (inferredBy_Orthology).	fkh (inferredBy_MotifSimilarity_n_Orthology).	254	2439	a;aay;Abl;Actn;AGO1;AhcyL1;alt;aop;Atg17;atl;Atpalpha;ben;betaTub56D;bif;Bmcp;br;brat;bun;CG10082;CG10283;CG11873;CG12054;CG12065;CG12576;CG13868;CG14478;CG15309;CG17746;CG17977;CG2865;CG2924;CG31324;CG31886;CG32369;CG32486;CG32767;CG33298;CG33970;CG34401;CG34417;CG3655;CG3726;CG42240;CG42674;CG4364;CG43658;CG45050;CG5059;CG5953;CG6051;CG6231;CG6512;CG6770;CG6959;CG7220;CG7878;CG8034;CG8177;CG900…
5kbUpTx	foxo_w001	hocomoco__FOXO1_HUMAN.H10MO.C	4.34	0.0999	foxo	**	foxo (inferredBy_Orthology).	FoxP (inferredBy_MotifSimilarity_n_Orthology).	162	1185	aay;Acsl;aop;Atg17;Atpalpha;ben;br;brat;bun;CG12054;CG13868;CG15309;CG15822;CG1998;CG2865;CG32369;CG32767;CG33298;CG33970;CG34401;CG34417;CG3655;CG3726;CG42240;CG43658;CG45050;CG5059;CG5953;CG6231;CG6512;CG9005;CG9932;CHES-1-like;chrb;cic;cindr;Clic;cpo;Crag;crp;Csk;ct;cv-2;cv-c;cwo;CycG;dally;Diap1;dlg1;Dp1;Drak;Dyrk2;E2f1;eIF5B;Eip63E;Eip75B;Eip93F;elav;Fas1;Fas2;fax;FER;for;Frl;Fs;fs(1)h;ftz-f…
5kbUpTx	foxo_w001	cisbp__M6245	4.27	0.099	foxo	**	foxo (inferredBy_Orthology).	FoxP (inferredBy_MotifSimilarity_n_Orthology).	108	598	aay;Atg17;Atpalpha;ben;brat;bun;CG12054;CG13868;CG15309;CG2865;CG32369;CG33298;CG33970;CG34401;CG3655;CG3726;CG43658;CG45050;CG5059;CG5953;CG6231;CG6512;CG9005;CHES-1-like;cic;cindr;Clic;Crag;crp;Csk;ct;cv-2;cv-c;cwo;CycG;dally;Dp1;Drak;Dyrk2;eIF5B;Eip63E;Eip75B;Eip93F;elav;Fas2;fax;FER;Frl;Fs;Gdh;GEFmeso;Glut4EF;h;hdc;Imp;InR;kay;klar;l(1)G0289;l(3)L1231;larp;lilli;Lk6;lola;Lpin;luna;mamo;Mi-2;M…
5kbUpTx	foxo_w001	cisbp__M0749	4.26	0.0988	foxo	**	fd102C; foxo (inferredBy_Orthology).	CHES-1-like; FoxP; slp2 (inferredBy_MotifSimilarity). FoxK; bin; slp1 (inferredBy_MotifSimilarity_n_Orthology).	234	2178	a;aay;Abl;Actn;AGO1;AhcyL1;alt;aop;Asph;Atg17;Atpalpha;ben;betaTub56D;betaTub60D;bif;Bmcp;br;brat;bun;CG11873;CG12054;CG12576;CG13868;CG13917;CG14478;CG15309;CG2865;CG32369;CG32486;CG32767;CG33298;CG33970;CG34401;CG34417;CG3655;CG3726;CG4364;CG43658;CG45050;CG5059;CG5953;CG6051;CG6231;CG6770;CG7220;CG8034;CG8177;CG9005;CG9932;CHES-1-like;chrb;cic;cindr;cnc;cpo;Crag;crol;crp;Crtc;Csk;ct;ctp;cv-2;c…
5kbUpTx	foxo_w001	scertf__badis.HCM1	4.25	0.0987	foxo	**	fd102C; foxo (inferredBy_Orthology).	FoxK; FoxP; slp1 (inferredBy_MotifSimilarity_n_Orthology).	164	1196	a;aay;AhcyL1;alt;aop;Atg17;atl;Atpalpha;betaTub56D;br;brat;bun;CG10283;CG11873;CG12054;CG13868;CG14478;CG15309;CG2865;CG32369;CG32767;CG33298;CG33970;CG34401;CG34417;CG3726;CG45050;CG5059;CG5953;CG6051;CG6231;CG6512;CG7220;CG8177;CG9005;CG9932;CHES-1-like;chrb;cic;cindr;Clic;cnc;cpo;Crag;crp;ct;cv-2;cv-c;cwo;CycG;dally;Diap1;dlg1;Dmtn;ed;Edc3;Eip63E;Eip75B;Eip93F;elav;elB;Fas1;Fas2;fax;FER;fl(2)d…
5kbUpTx	foxo_w001	transfac_pro__M01630	4.08	0.0966	foxo	**	fd102C; foxo (inferredBy_Orthology).		213	1869	a;aay;Abl;AGO1;AhcyL1;aop;Asph;Atg17;Atpalpha;ben;betaTub56D;bif;Bmcp;br;brat;bun;CG10082;CG11873;CG12054;CG12576;CG13868;CG14478;CG15309;CG17977;CG2865;CG32369;CG32486;CG32767;CG33298;CG33970;CG34401;CG34417;CG3655;CG3726;CG4364;CG45050;CG5059;CG5151;CG5953;CG6051;CG6231;CG6512;CG7220;CG8177;CG9005;CG9932;CHES-1-like;chrb;cic;cindr;CkIalpha;Clic;cnc;cpo;Crag;crb;crol;crp;Crtc;Csk;ct;cv-2;cv-c;cw…
5kbUpTx	foxo_w001	jaspar__MA0317.1	4.08	0.0965	foxo	**	fd102C; foxo (inferredBy_Orthology).		213	1866	a;aay;Abl;AGO1;AhcyL1;aop;Asph;Atg17;Atpalpha;ben;betaTub56D;bif;Bmcp;br;brat;bun;CG10082;CG11873;CG12054;CG12576;CG13868;CG14478;CG15309;CG17977;CG2865;CG32369;CG32486;CG32767;CG33298;CG33970;CG34401;CG34417;CG3655;CG3726;CG4364;CG45050;CG5059;CG5151;CG5953;CG6051;CG6231;CG6512;CG7220;CG8177;CG9005;CG9932;CHES-1-like;chrb;cic;cindr;CkIalpha;Clic;cnc;cpo;Crag;crb;crol;crp;Crtc;Csk;ct;cv-2;cv-c;cw…
5kbUpTx	foxo_w001	cisbp__M0721	4.07	0.0965	foxo	*		CHES-1-like; bin; fd59A; slp1; slp2 (inferredBy_MotifSimilarity). FoxK; FoxP; croc; fd102C; fd64A; fkh; foxo (inferredBy_MotifSimilarity_n_Orthology).	219	1919	14-3-3epsilon;a;aay;Actn;AGO1;AhcyL1;aop;Atg17;Atpalpha;ben;betaTub56D;betaTub60D;Bmcp;br;brat;bun;CG11873;CG12054;CG12576;CG14478;CG15309;CG2865;CG32369;CG32486;CG32767;CG33298;CG33970;CG34401;CG34417;CG3655;CG3726;CG4364;CG43658;CG45050;CG5059;CG5953;CG6051;CG6231;CG6770;CG6959;CG8177;CG9005;CG9932;CHES-1-like;chrb;cic;cindr;CkIalpha;cnc;cpo;Crag;crol;crp;Crtc;Csk;ct;ctp;cv-2;cv-c;cwo;CycG;dall…
5kbUpTx	foxo_w001	yetfasco__YCR065W_570	4.07	0.0964	foxo	**	fd102C; foxo (inferredBy_Orthology).		213	1883	a;aay;Abl;AGO1;AhcyL1;aop;Asph;Atg17;Atpalpha;ben;betaTub56D;bif;Bmcp;br;brat;bun;CG10082;CG11873;CG12054;CG12576;CG13868;CG14478;CG15309;CG17977;CG2865;CG32369;CG32486;CG32767;CG33298;CG33970;CG34401;CG34417;CG3655;CG3726;CG4364;CG45050;CG5059;CG5151;CG5953;CG6051;CG6231;CG6512;CG7220;CG8177;CG9005;CG9932;CHES-1-like;chrb;cic;cindr;CkIalpha;Clic;cnc;cpo;Crag;crb;crol;crp;Crtc;Csk;ct;cv-2;cv-c;cw…
5kbUpTx	foxo_w001	cisbp__M0718	4.06	0.0962	foxo	*	FoxK (inferredBy_Orthology).	CHES-1-like; bin; slp1 (inferredBy_MotifSimilarity). FoxP; croc; fd102C; fd59A; fd64A; fkh; foxo (inferredBy_MotifSimilarity_n_Orthology).	216	1798	a;aay;Actn;AGO1;AhcyL1;aop;Atg17;Atpalpha;ben;betaTub56D;betaTub60D;br;brat;bun;CG11873;CG12004;CG12054;CG12576;CG13868;CG13917;CG14478;CG15309;CG2865;CG31717;CG32369;CG32486;CG32767;CG33298;CG33970;CG34417;CG3655;CG3726;CG42240;CG4364;CG43658;CG45050;CG5059;CG5953;CG6051;CG6231;CG6770;CG8177;CG9005;CG9932;CHES-1-like;chrb;ci;cic;cindr;cnc;cpo;Crag;crb;crol;Crtc;Csk;ct;ctp;cv-2;cv-c;cwo;CycG;dall…
5kbUpTx	foxo_w001	swissregulon__sacCer__HCM1	4.01	0.0957	foxo	**	fd102C; foxo (inferredBy_Orthology).		211	1853	a;aay;Abl;AGO1;AhcyL1;aop;Asph;Atg17;Atpalpha;ben;betaTub56D;bif;Bmcp;br;brat;bun;CG10082;CG11873;CG12054;CG12576;CG13868;CG14478;CG15309;CG17977;CG2865;CG32369;CG32486;CG32767;CG33298;CG33970;CG34401;CG34417;CG3655;CG3726;CG4364;CG45050;CG5059;CG5151;CG5953;CG6051;CG6231;CG6512;CG7220;CG8177;CG9005;CG9932;CHES-1-like;chrb;cic;cindr;CkIalpha;Clic;cnc;cpo;Crag;crb;crol;crp;Crtc;Csk;ct;cv-2;cv-c;cw…
5kbUpTx	foxo_w001	cisbp__M0716	3.94	0.0947	foxo	*		FoxK; foxo (inferredBy_MotifSimilarity_n_Orthology).	158	1127	a;aay;Atg17;Atpalpha;ben;betaTub56D;bif;br;brat;bun;CG11873;CG12054;CG13868;CG14478;CG15309;CG2865;CG32369;CG32486;CG32767;CG33298;CG33970;CG34401;CG34417;CG3655;CG3726;CG4364;CG45050;CG5059;CG5953;CG6051;CG6231;CG6512;CG7220;CG9005;CG9932;CHES-1-like;chrb;cindr;CkIalpha;cnc;cpo;Crag;crol;crp;Csk;ct;cv-2;cv-c;cwo;CycG;dally;Diap1;dlg1;Dmtn;Drak;Dyrk2;E2f1;ed;eIF5B;Eip63E;Eip75B;Eip93F;elav;Fas1;F…
5kbUpTx	foxo_w001	hocomoco__FOXO4_HUMAN.H10MO.C	3.86	0.0937	foxo	**	foxo (inferredBy_Orthology).	FoxK; fd102C (inferredBy_MotifSimilarity_n_Orthology).	139	873	aay;Abl;aop;Asph;Atpalpha;ben;betaTub56D;bmm;brat;bun;CG10082;CG12054;CG13868;CG15309;CG2865;CG32369;CG32767;CG33970;CG34401;CG34417;CG3655;CG3726;CG42674;CG45050;CG5953;CG6231;CG6512;CG7220;CG9005;CHES-1-like;chrb;cic;cindr;Clic;cpo;Crag;crp;Crtc;Csk;ct;cv-2;cv-c;CycG;dally;Dmtn;DOR;Dp1;Drak;Dyrk2;ed;Eip63E;Eip75B;Eip93F;elav;ex;Fas1;Fas2;fax;FER;Frl;Fs;ftz-f1;Gdh;GEFmeso;glec;Glut4EF;Gug;hdc;He…
5kbUpTx	foxo_w001	cisbp__M6247	3.76	0.0923	foxo	**	foxo (inferredBy_Orthology).	FoxK; fd102C (inferredBy_MotifSimilarity_n_Orthology).	140	976	aay;Abl;aop;Asph;Atpalpha;ben;betaTub56D;betaTub60D;bmm;brat;bun;CG10082;CG12054;CG13868;CG15309;CG2865;CG32369;CG32767;CG33970;CG3655;CG3726;CG42674;CG4393;CG45050;CG5953;CG6231;CG6512;CG7220;CG9005;CG9932;CHES-1-like;chrb;cic;cindr;Clic;cpo;Crag;crp;Crtc;Csk;ct;cv-2;cv-c;CycG;dally;Dmtn;DOR;Dp1;Drak;Dyrk2;ed;eIF5B;Eip63E;Eip75B;Eip93F;elav;ex;Fas1;Fas2;fax;FER;Frl;Fs;Gdh;GEFmeso;gish;glec;Glut4…
5kbUpTx	foxo_w001	cisbp__M0750	3.75	0.0923	foxo	*	FoxP (inferredBy_Orthology).	CHES-1-like; bin; slp1 (inferredBy_MotifSimilarity). FoxK; bs; croc; fd59A; fd64A; fd96Ca; fd96Cb; fkh; foxo (inferredBy_MotifSimilarity_n_Orthology).	243	2309	a;aay;Abl;Acsl;Actn;AGO1;AhcyL1;aop;Atg17;Atpalpha;B4;ben;betaTub56D;betaTub60D;bif;Bmcp;br;brat;bun;CG11873;CG12004;CG12054;CG12576;CG13868;CG13917;CG14478;CG15309;CG1998;CG2865;CG31717;CG32369;CG32486;CG32767;CG33298;CG33970;CG34401;CG34417;CG3655;CG3726;CG40045;CG42240;CG4364;CG43658;CG45050;CG5059;CG5151;CG5953;CG6051;CG6115;CG6231;CG6512;CG6770;CG7220;CG8177;CG9005;CG9932;CHES-1-like;chrb;ci…
5kbUpTx	foxo_w001	cisbp__M0757	3.74	0.0921	foxo	*		CHES-1-like; bin; slp1 (inferredBy_MotifSimilarity). FoxK; FoxP; croc; fd102C; fd59A; fd64A; fkh; foxo (inferredBy_MotifSimilarity_n_Orthology).	260	2571	14-3-3epsilon;a;aay;Abl;Actn;AGO1;AhcyL1;alt;aop;Atg17;Atpalpha;ben;betaTub56D;betaTub60D;Bmcp;br;brat;bun;CG11873;CG12004;CG12054;CG12576;CG13784;CG13868;CG13917;CG14478;CG15309;CG17746;CG2865;CG2924;CG31717;CG32369;CG32486;CG32767;CG33298;CG33970;CG34401;CG34417;CG3655;CG3726;CG42240;CG4364;CG43658;CG45050;CG5059;CG5953;CG6051;CG6115;CG6231;CG6512;CG6770;CG8177;CG9005;CG9932;CHES-1-like;chrb;ci…
5kbUpTx	foxo_w001	cisbp__M5456	3.63	0.0908	foxo	*		FoxP; slp2 (inferredBy_MotifSimilarity). fd102C; foxo; slp1 (inferredBy_MotifSimilarity_n_Orthology).	181	1291	aay;aop;Asph;Atg17;Atpalpha;babos;ben;betaTub56D;bif;br;brat;bun;cbt;Cdc42;CG12054;CG13868;CG14478;CG15309;CG2865;CG31324;CG32369;CG32767;CG33298;CG33970;CG34401;CG34417;CG3655;CG3726;CG42674;CG43658;CG45050;CG5059;CG5151;CG5953;CG6231;CG6770;CG7220;CG9005;CG9932;CHES-1-like;chrb;cic;CkIalpha;cnc;cpo;Crag;crol;crp;Crtc;ct;ctp;cv-2;cv-c;cwo;CycG;Cyp18a1;dally;Diap1;DOR;Dp1;Dyrk2;ed;eIF5B;Eip63E;Ei…
5kbUpTx	foxo_w001	cisbp__M0734	3.6	0.0903	foxo	*	croc (inferredBy_Orthology).	bin; fd59A; fd64A; slp1 (inferredBy_MotifSimilarity). FoxK; FoxP; bs; fd96Ca; fd96Cb; fkh; foxo (inferredBy_MotifSimilarity_n_Orthology).	187	1402	a;aay;Actn;AGO1;aop;Atg17;Atpalpha;betaTub56D;betaTub60D;br;brat;bun;CG11873;CG12004;CG12054;CG12576;CG13917;CG14478;CG15309;CG2865;CG31324;CG32369;CG32486;CG32767;CG33298;CG33970;CG34417;CG3655;CG3726;CG40045;CG43658;CG45050;CG5059;CG5953;CG6051;CG6231;CG8177;CG9005;CG9932;CHES-1-like;chrb;ci;cic;cindr;cnc;cpo;crol;Crtc;Csk;ct;ctp;cv-2;cv-c;cwo;CycG;dally;Diap1;dlg1;Dmtn;DOR;drongo;Dyrk2;Eaf;ed;…
5kbUpTx	foxo_w001	cisbp__M0732	3.55	0.0897	foxo	*	croc (inferredBy_Orthology).	bin; fd59A; fd64A; slp1 (inferredBy_MotifSimilarity). FoxK; FoxP; bs; fd96Ca; fd96Cb; fkh; foxo (inferredBy_MotifSimilarity_n_Orthology).	186	1428	a;aay;Actn;AGO1;alt;aop;Atg17;Atpalpha;betaTub56D;betaTub60D;bif;br;brat;bun;CG11873;CG12004;CG12054;CG12576;CG14478;CG15309;CG2865;CG31324;CG32369;CG32486;CG32767;CG33298;CG33970;CG34401;CG34417;CG3655;CG3726;CG43658;CG45050;CG5059;CG5953;CG6051;CG6231;CG8177;CG9005;CG9932;CHES-1-like;chrb;cic;cindr;cnc;cpo;crol;Crtc;Csk;ct;ctp;cv-2;cv-c;cwo;CycG;dally;Diap1;dlg1;Dmtn;DOR;Dyrk2;Eaf;ed;egh;eIF5B;…
5kbUpTx	foxo_w001	cisbp__M0727	3.54	0.0895	foxo	*		CHES-1-like; bin; fd59A; slp1; slp2 (inferredBy_MotifSimilarity). FoxK; FoxP; croc; fd102C; fd64A; fkh; foxo (inferredBy_MotifSimilarity_n_Orthology).	157	1091	a;aay;Actn;AGO1;aop;Atg17;Atpalpha;ben;betaTub56D;betaTub60D;br;brat;bun;CG11873;CG12054;CG12576;CG14478;CG15309;CG2865;CG32369;CG32486;CG32767;CG33298;CG33970;CG34417;CG4364;CG45050;CG5953;CG6051;CG6231;CG8177;CG9005;CG9932;CHES-1-like;chrb;cic;cnc;cpo;crol;Crtc;Csk;ct;ctp;cv-2;cv-c;cwo;CycG;dally;Diap1;dlg1;Dmtn;ed;Eip75B;Eip93F;elav;elB;EndoA;ens;Fas1;Fas2;fax;FER;Fis1;fl(2)d;foxo;Frl;fs(1)h;f…
5kbUpTx	foxo_w001	cisbp__M0731	3.48	0.0887	foxo	**	foxo (inferredBy_Orthology).	CHES-1-like; bin; slp1; slp2 (inferredBy_MotifSimilarity). FoxK; FoxP; fd102C; fd59A; fd64A; fkh (inferredBy_MotifSimilarity_n_Orthology).	154	1156	a;aay;AhcyL1;aop;Atg17;Atpalpha;betaTub56D;betaTub60D;br;brat;bun;CG11873;CG12054;CG14478;CG15309;CG2865;CG32369;CG32767;CG33970;CG34417;CG3655;CG3726;CG45050;CG5059;CG5953;CG6051;CG6115;CG6231;CG6770;CG7220;CG8177;CG9005;CG9932;CHES-1-like;chrb;cic;cindr;cnc;cpo;Crag;crol;crp;Csk;ct;ctp;cv-2;cv-c;cwo;CycG;dally;Diap1;dlg1;Dmtn;DOR;ed;eIF5B;Eip63E;Eip75B;Eip93F;elav;elB;EndoA;Fas1;Fas2;fax;FER;fl…
5kbUpTx	foxo_w001	cisbp__M0748	3.47	0.0886	foxo	*		CHES-1-like; slp1; slp2 (inferredBy_MotifSimilarity). FoxK; FoxP; fd102C; fd59A; fkh; foxo (inferredBy_MotifSimilarity_n_Orthology).	226	2167	a;aay;Abl;Actn;AGO1;AhcyL1;aop;Atg17;Atpalpha;ben;betaTub56D;betaTub60D;bif;Bmcp;br;brat;bun;CG10082;CG11873;CG12004;CG12054;CG12576;CG13868;CG13917;CG14478;CG15309;CG2865;CG32369;CG32486;CG32767;CG33298;CG33970;CG34417;CG3655;CG3726;CG4364;CG45050;CG5059;CG5953;CG6051;CG6115;CG6231;CG6512;CG6770;CG7220;CG8177;CG9005;CG9932;CHES-1-like;chrb;cic;cindr;cnc;cpo;Crag;crb;crol;crp;Crtc;Csk;ct;ctp;cv-2…
5kbUpTx	foxo_w001	cisbp__M0752	3.46	0.0886	foxo	*	FoxP (inferredBy_Orthology).	CHES-1-like; bin; slp1; slp2 (inferredBy_MotifSimilarity). FoxK; bs; croc; fd102C; fd59A; fd64A; fd96Ca; fd96Cb; fkh; foxo (inferredBy_MotifSimilarity_n_Orthology).	192	1564	a;aay;Actn;AGO1;AhcyL1;aop;Atg17;Atpalpha;betaTub56D;betaTub60D;Bmcp;br;brat;bun;CG11873;CG12004;CG12054;CG12576;CG13917;CG14478;CG15309;CG2865;CG32369;CG32486;CG32767;CG33298;CG33970;CG34417;CG3726;CG4364;CG43658;CG45050;CG5059;CG5953;CG6051;CG6231;CG8177;CG9005;CG9932;CHES-1-like;chrb;cic;cindr;cnc;cpo;Crag;crol;Crtc;Csk;ct;ctp;cv-2;cv-c;cwo;CycG;dally;Diap1;dlg1;Dmtn;DOR;Drak;Dyrk2;ed;eIF5B;Ei…
5kbUpTx	foxo_w001	cisbp__M0730	3.44	0.0883	foxo	**	foxo (inferredBy_Orthology).	FoxK; FoxP; bs; fd102C; fkh (inferredBy_MotifSimilarity_n_Orthology).	163	1227	a;aay;Actn;AhcyL1;aop;Atg17;Atpalpha;betaTub56D;betaTub60D;br;brat;bun;CG11873;CG12054;CG14478;CG15309;CG2865;CG32369;CG32486;CG32767;CG33298;CG33970;CG34417;CG3655;CG3726;CG4364;CG45050;CG5059;CG5953;CG6051;CG6231;CG9005;CG9932;CHES-1-like;chrb;cindr;cnc;cpo;Crag;crol;crp;Csk;ct;ctp;cv-2;cv-c;cwo;CycG;dally;Diap1;dlg1;Dmtn;ed;eIF5B;Eip63E;Eip75B;Eip93F;elav;elB;Fas1;Fas2;fax;FER;fl(2)d;foxo;Frl;…
5kbUpTx	foxo_w001	cisbp__M0735	3.43	0.0881	foxo	**	foxo (inferredBy_Orthology).	CHES-1-like; slp2 (inferredBy_MotifSimilarity). FoxK; FoxP; fd102C; fkh; slp1 (inferredBy_MotifSimilarity_n_Orthology).	210	1757	a;aay;Actn;AGO1;AhcyL1;alt;aop;Atg17;Atpalpha;ben;betaTub56D;betaTub60D;br;brat;bun;CG11873;CG12054;CG12576;CG13784;CG13917;CG14478;CG15309;CG17746;CG2865;CG32369;CG32486;CG32767;CG33298;CG33970;CG34401;CG34417;CG3655;CG3726;CG4364;CG43658;CG45050;CG5953;CG6051;CG6231;CG8177;CG9005;CG9932;CHES-1-like;chrb;cic;cindr;cnc;cpo;crb;crol;crp;Crtc;Csk;ct;ctp;cv-2;cv-c;cwo;CycG;dally;Diap1;dlg1;Dmtn;DOR;…
5kbUpTx	foxo_w001	cisbp__M0723	3.36	0.0872	foxo	*	slp1 (inferredBy_Orthology).	CHES-1-like; bin (inferredBy_MotifSimilarity). FoxK; FoxP; croc; fd102C; fd59A; fd64A; fkh; foxo (inferredBy_MotifSimilarity_n_Orthology).	205	1728	a;aay;Actn;AGO1;AhcyL1;alt;aop;Atg17;Atpalpha;ben;betaTub56D;betaTub60D;br;brat;bun;CG11873;CG12004;CG12054;CG12576;CG13917;CG14478;CG15309;CG2865;CG31717;CG32369;CG32486;CG32767;CG33298;CG33970;CG34417;CG3655;CG3726;CG4364;CG45050;CG5059;CG5953;CG6051;CG6231;CG8177;CG9005;CG9932;CHES-1-like;chrb;cic;cindr;cnc;cpo;crb;crol;crp;Crtc;Csk;ct;ctp;cv-2;cv-c;cwo;CycG;dally;Diap1;dlg1;Dmtn;DOR;Eb1;ed;eI…
5kbUpTx	foxo_w001	cisbp__M0756	3.3	0.0864	foxo	*		FoxK; foxo (inferredBy_MotifSimilarity_n_Orthology).	217	1886	14-3-3epsilon;a;aay;Actn;AGO1;alt;aop;Atg17;Atpalpha;ben;betaTub56D;betaTub60D;br;brat;bun;CG11873;CG12054;CG12576;CG13784;CG13917;CG14478;CG15309;CG2865;CG31324;CG32369;CG32486;CG32767;CG33298;CG33970;CG34417;CG3655;CG3726;CG4364;CG43658;CG4393;CG45050;CG5151;CG5953;CG6051;CG6231;CG6512;CG8034;CG8177;CG9005;CG9932;CHES-1-like;chrb;cic;cindr;CkIalpha;cnc;cpo;crb;crol;crp;Crtc;Csk;ct;ctp;cv-2;cv-c…
5kbUpTx	foxo_w001	tfdimers__MD00532	3.28	0.0862	foxo	**	foxo (inferredBy_Orthology).		259	2589	14-3-3epsilon;a;aay;Abl;Acsl;Actn;AGO1;akirin;alt;aop;Asph;Atg17;Atpalpha;B4;babos;baz;ben;betaTub56D;betaTub60D;bif;Bmcp;br;brat;bun;cbt;Cdc42;CG10082;CG10283;CG11873;CG12054;CG12065;CG13784;CG13917;CG14478;CG15309;CG15822;CG17977;CG2865;CG2924;CG31324;CG31886;CG31908;CG32369;CG32767;CG33298;CG33970;CG34401;CG34417;CG3655;CG3726;CG42240;CG43658;CG45050;CG5059;CG5151;CG5399;CG5953;CG6051;CG6512;C…
5kbUpTx	foxo_w001	taipale__FOXJ3_DBD_RTAAACAA	3.27	0.0861	foxo	*		FoxP; slp1; slp2 (inferredBy_MotifSimilarity). bin; fd102C; foxo (inferredBy_MotifSimilarity_n_Orthology).	186	1418	aay;Acsl;aop;Asph;Atg17;Atpalpha;babos;ben;betaTub56D;betaTub60D;bif;br;brat;bun;cbt;Cdc42;CG10082;CG12054;CG13868;CG14478;CG15309;CG2865;CG31324;CG32369;CG32767;CG33298;CG33970;CG34401;CG34417;CG3655;CG3726;CG42674;CG43658;CG4393;CG45050;CG5059;CG5151;CG5953;CG6231;CG6770;CG7220;CG9005;CG9932;CHES-1-like;chrb;cic;CkIalpha;cnc;cpo;Crag;crol;crp;Crtc;ct;ctp;cv-2;cv-c;cwo;CycG;Cyp18a1;dally;Diap1;D…
5kbUpTx	foxo_w001	transfac_pro__M01137	3.08	0.0836	foxo	**	foxo (inferredBy_Orthology).	slp1 (inferredBy_MotifSimilarity). FoxK; FoxP (inferredBy_MotifSimilarity_n_Orthology).	40	170	aay;Atg17;Atpalpha;bun;CG32369;CG45050;CG5953;CG6231;Crag;ct;cv-2;cv-c;CycG;dally;Diap1;ed;Eip75B;fax;FER;Gdh;larp;lilli;Lpin;luna;Mp;Paip2;Pdp1;prage;Prosap;ps;Ptp99A;pyd;Rab5;rdx;REPTOR;rho;rudhira;shot;spen;tai
5kbUpTx	foxo_w001	cisbp__M0725	3.02	0.0829	foxo	*	FoxP (inferredBy_Orthology).	CHES-1-like; bin; slp1; slp2 (inferredBy_MotifSimilarity). FoxK; fd102C; fd59A; fd64A; fd96Ca; fd96Cb; fkh; foxo (inferredBy_MotifSimilarity_n_Orthology).	235	2359	a;aay;Abl;Acsl;Actn;AhcyL1;aop;Asph;Atg17;Atpalpha;B4;babos;betaTub56D;betaTub60D;bif;Bmcp;br;brat;bun;CG10082;CG11873;CG12004;CG12054;CG14478;CG15309;CG1998;CG2865;CG31324;CG31717;CG32369;CG32486;CG32767;CG33970;CG34401;CG34417;CG3655;CG3726;CG42674;CG4364;CG43658;CG45050;CG5059;CG5151;CG5953;CG6051;CG6115;CG6231;CG6770;CG6959;CG7220;CG8177;CG9005;CG9932;CHES-1-like;chrb;ci;cic;cindr;cnc;cpo;Cra…
5kbUpTx	foxo_w001	cisbp__M0728	3.02	0.0828	foxo	*		croc; foxo (inferredBy_MotifSimilarity_n_Orthology).	192	1802	a;aay;Abl;Asph;Atg17;Atpalpha;B4;ben;betaTub56D;betaTub60D;Bmcp;br;brat;bun;CG10082;CG10283;CG11873;CG12054;CG13868;CG14478;CG15309;CG1998;CG2865;CG31886;CG32369;CG32767;CG33229;CG33298;CG33970;CG34401;CG34417;CG3655;CG3726;CG4080;CG42674;CG4393;CG45050;CG5059;CG5953;CG6051;CG6231;CG6512;CG6770;CG7220;CG8177;CG9005;CG9932;CHES-1-like;chrb;cic;cindr;Clic;cpo;Crag;crol;crp;Crtc;ct;cv-2;cv-c;cwo;Cyc…
5kbUpTx	ftz-f1_w005	hocomoco__NR6A1_HUMAN.H10MO.B	3.21	0.141	ftz-f1	*	Hr4 (inferredBy_Orthology).	ERR; ftz-f1; usp (inferredBy_MotifSimilarity_n_Orthology).	24	284	Atf3;bun;cdi;CG12065;CG32369;CG3655;CG8177;CG8312;CG9932;Drak;Eip93F;ftz-f1;hdc;InR;larp;mamo;mfas;Oatp74D;REPTOR;Samuel;shn;Tis11;trx;Wdr62
5kbUpTx	ftz-f1_w005	cisbp__M6397	3.21	0.141	ftz-f1	*	Hr4 (inferredBy_Orthology).	ERR; ftz-f1; usp (inferredBy_MotifSimilarity_n_Orthology).	24	289	Atf3;bun;cdi;CG12065;CG32369;CG3655;CG8177;CG8312;CG9932;Drak;Eip93F;ftz-f1;hdc;InR;larp;mamo;mfas;Oatp74D;REPTOR;Samuel;shn;Tis11;trx;Wdr62
5kbUpTx	Hnf4_top10perTarget	transfac_pro__M07961	3.34	0.0819	Hnf4	**	Hnf4 (directAnnotation).		10	306	Adk3;Ady43A;CG42673;CG45050;Ect4;Glut4EF;Leash;Ns4;prage;sug
5kbUpTx	Hnf4_top50perTarget	transfac_pro__M07959	3.03	0.0476	Hnf4	**	Hnf4 (directAnnotation).	svp (inferredBy_MotifSimilarity_n_Orthology).	70	374	Acsl;Adk3;Atg1;bip1;bun;CenG1A;CG10077;CG11151;CG13516;CG18135;CG32365;CG33970;CG45050;CG5151;CG5590;CG5958;CG5973;CG6178;CG6621;CG7029;CG7970;CG8312;CG9577;CG9674;cpo;CPT2;CTCF;cv-c;Cyt-b5;daw;Drak;Ect4;Eip63E;Eip75B;fabp;Fas3;fsd;GEFmeso;Khc-73;klu;kuz;Leash;Lsd-2;luna;Mfe2;mgl;Mgstl;Mical;msn;MYPT-75D;nuf;p38a;Pak3;par-1;Pde11;Pex13;PHGPx;Pli;qm;Rab5;REPTOR;Sc2;ScpX;sdt;shep;siz;SLC5A11;Traf4;…
5kbUpTx	Hnf4_top50perTarget	cisbp__M5526	3	0.0474	Hnf4	**	Hnf4 (inferredBy_Orthology).		87	522	Acsl;AdipoR;Adk3;Ady43A;alc;Atg13;Baldspot;Btk29A;bun;cbt;ced-6;CG10077;CG11151;CG1129;CG11309;CG14478;CG18135;CG3164;CG33970;CG3655;CG42673;CG43066;CG45050;CG4911;CG5151;CG5191;CG5455;CG5590;CG6621;CG7970;CG8031;CG8034;CG8312;CG9577;CG9674;cno;cpo;CPT2;CtBP;cv-c;daw;Diap1;DOR;Drak;Ect4;Eip63E;Eip75B;Eip93F;Fem-1;flw;frj;Gadd45;GEFmeso;Glut4EF;GstT1;Hr4;klar;Leash;lola;Lpin;Lsd-1;Lsd-2;Mfe2;mgl;M…
5kbUpTx	Hsf_w001	cisbp__M6287	3.38	0.0643	Hsf	*		Hsf (inferredBy_MotifSimilarity). pb (inferredBy_MotifSimilarity_n_Orthology).	79	746	AGO1;Argk;Arpc2;Atpalpha;ben;BI-1;br;BtbVII;Caper;CG1354;CG17834;CG31176;CG32264;CG32767;CG34383;CG4022;CG43658;CG5110;CG5532;cher;Cka;cnc;CycG;d4;DnaJ-1;DnaJ-H;ed;Eip63E;Eip74EF;Eip75B;Eip93F;Fas2;FER;fus;gish;Hr4;Hsp23;Hsp26;Hsp27;Hsp68;Hsp70Bc;Idh;Jupiter;jvl;kay;klar;lola;mamo;mbf1;mgl;Mkp3;Mp20;NAT1;ND-13A;ND-MLRQ;nkd;Obp44a;ps;psq;ref(2)P;Rpn13;scyl;sd;sgg;Sirt1;skd;Smr;SNF4Agamma;spri;tai;…
5kbUpTx	Hsf_w001	hocomoco__HSF2_HUMAN.H10MO.A	3.32	0.0637	Hsf	*		Hsf (inferredBy_MotifSimilarity). pb (inferredBy_MotifSimilarity_n_Orthology).	77	735	AGO1;Argk;Arpc2;Atpalpha;ben;BI-1;br;BtbVII;Caper;CG1354;CG17834;CG31176;CG32264;CG32767;CG34383;CG4022;CG43658;CG5110;CG5532;cher;Cka;cnc;CycG;d4;DnaJ-1;DnaJ-H;ed;Eip63E;Eip74EF;Eip75B;Eip93F;FER;fus;gish;Hr4;Hsp23;Hsp26;Hsp27;Hsp67Bc;Hsp68;Hsp70Bc;Idh;Jupiter;jvl;kay;klar;mamo;mbf1;mgl;Mkp3;Mp20;NAT1;ND-13A;ND-MLRQ;nkd;Obp44a;psq;ref(2)P;Rpn13;scyl;sd;sgg;Sirt1;skd;Smr;SNF4Agamma;spri;tai;Thor;…
5kbUpTx	Hsf_w001	transfac_pro__M02017	3.32	0.0637	Hsf	**	Hsf (inferredBy_Orthology).		43	307	AGO1;aop;Argk;ben;BI-1;Caper;CG4022;CG43736;crol;cv-c;CycG;DnaJ-H;ed;Eip75B;Eip93F;fus;Gmap;how;Hsp23;Hsp26;Hsp27;Hsp67Bc;Hsp68;Hsp70Bc;Imp;jvl;kay;kst;lola;mgl;Mp20;osp;Prosap;Rpn13;scyl;sgg;shot;Sirt1;sky;tai;unc-45;Unr;wts
5kbUpTx	Hsf_w001	hocomoco__HSF4_HUMAN.H10MO.D	3.18	0.0624	Hsf	**	Hsf (inferredBy_Orthology).	pb (inferredBy_MotifSimilarity_n_Orthology).	22	114	Argk;BI-1;CG31176;cnc;CycG;DnaJ-1;DnaJ-H;Eip75B;Hsp23;Hsp26;Hsp68;Hsp70Bc;kay;mbf1;mgl;Mp20;ref(2)P;Rpn13;scyl;sgg;Sirt1;unc-45
5kbUpTx	Hsf_w001	transfac_pro__M01023	3.09	0.0614	Hsf	**	Hsf (inferredBy_Orthology).		64	519	AnxB9;aop;Argk;Atpalpha;ben;br;Capr;CG31176;CG32264;CG34383;CG3638;CG8303;cnc;Crtc;cv-c;CycG;dally;Dg;DnaJ-1;DnaJ-H;Eip74EF;Eip75B;Eip93F;FER;hppy;Hsp23;Hsp26;Hsp27;Hsp68;Hsp70Bc;hts;Jafrac1;Jupiter;jvl;kay;kis;klar;LanB2;lawc;lolal;mamo;mgl;Mkp3;Mp20;Prosap;ref(2)P;Rho1;rin;Rpn13;sbb;scyl;sgg;Sirt1;Smr;Socs36E;spen;tai;Tim17b;Trf2;uex;unc-45;Unr;wech;wts
5kbUpTx	Irp-1B_top50	hdpi__ACO1	3.31	0.0481	Irp-1B	**	Irp-1A; Irp-1B (inferredBy_Orthology).		1	28	CG13689
5kbUpTx	Irp-1B_w001	hdpi__ACO1	3.35	0.0374	Irp-1B	**	Irp-1A; Irp-1B (inferredBy_Orthology).		264	1507	14-3-3epsilon;14-3-3zeta;AGO1;AMPdeam;aop;AP-2alpha;Aps;apt;ASPP;Atg8a;Atpalpha;babo;bbg;bip1;Bsg;Btk29A;bun;Cam;CAP;ced-6;CG10479;CG11486;CG11537;CG11723;CG12004;CG12025;CG12576;CG13585;CG13603;CG13689;CG13907;CG14073;CG1440;CG14478;CG16791;CG17672;CG18858;CG30460;CG31635;CG32369;CG32486;CG32521;CG32772;CG34417;CG3638;CG42238;CG42240;CG4238;CG42524;CG42748;CG4364;CG43693;CG43736;CG45049;CG45050;…
5kbUpTx	jigr1_top50	flyfactorsurvey__jigr1_SANGER_5_FBgn0039350	3.24	0.154	jigr1	**	jigr1 (directAnnotation).		7	406	CG42238;CG43759;ct;hdc;jigr1;Pvf1;stg
5kbUpTx	jim_top50	tfdimers__MD00560	3.3	0.145	jim	**	jim (inferredBy_Orthology).		4	62	ct;hdc;jim;pum
5kbUpTx	jim_top50	transfac_pro__M06545	3.02	0.137	jim	**	jim (inferredBy_Orthology).		4	93	CG43759;ct;hdc;RapGAP1
5kbUpTx	jim_top50perTarget	flyfactorsurvey__jim_F1-9_SOLEXA_2.5_FBgn0027339	3.54	0.112	jim	**	jim (directAnnotation).	rn; sqz (inferredBy_MotifSimilarity).	17	392	brat;CG10543;CG43759;ct;Dsp1;ed;Fas2;hdc;Imp;jim;larp;mamo;Myc;Pdp1;pum;RapGAP1;sbb
5kbUpTx	jim_top50perTarget	cisbp__M5048	3.43	0.11	jim	**	jim (directAnnotation).	rn; sqz (inferredBy_MotifSimilarity).	17	444	brat;CG10543;CG43759;ct;Dsp1;ed;Fas2;hdc;Imp;jim;larp;mamo;Myc;Pdp1;pum;RapGAP1;sbb
5kbUpTx	jim_top50perTarget	tfdimers__MD00560	3.23	0.106	jim	**	jim (inferredBy_Orthology).		15	345	brat;CG10543;CG1910;CG43759;ct;ed;fra;hdc;jim;mamo;Pdp1;pum;RapGAP1;Rtf1;sbb
5kbUpTx	jim_w001	flyfactorsurvey__jim_SANGER_2.5_FBgn0027339	4.74	0.0569	jim	**	jim (directAnnotation).		406	1513	14-3-3zeta;aay;Abl;Act5C;AGO1;Alh;AMPdeam;aop;apt;Argk;Arp2;ASPP;Atf3;Atg8a;Atpalpha;Atx2;B4;barc;baz;bbg;BCL7-like;ben;bowl;br;brat;bru2;Bsg;Btk29A;btsz;bun;C3G;CadN;Cam;CanA-14F;CAP;Caper;caps;capu;CdGAPr;cdi;ced-6;CenG1A;CG10082;CG10479;CG10543;CG10939;CG11122;CG11486;CG11811;CG13868;CG13907;CG14073;CG14441;CG14478;CG15365;CG1578;CG15822;CG1677;CG16791;CG2865;CG30377;CG32066;CG32264;CG32365;CG…
5kbUpTx	jim_w001	cisbp__M5048	4.49	0.0554	jim	**	jim (directAnnotation).	rn; sqz (inferredBy_MotifSimilarity).	286	892	14-3-3zeta;aay;Act5C;AGO1;AMPdeam;aop;Aps;ASPP;Atf3;Atg8a;Atpalpha;Atx2;baz;bbg;BCL7-like;ben;bowl;br;brat;Bsg;Btk29A;btsz;bun;CadN;Cam;CanA-14F;Caper;caps;capu;cdc14;ced-6;CG10082;CG10479;CG10543;CG11122;CG11486;CG11811;CG13868;CG13907;CG14073;CG15822;CG1677;CG16791;CG2865;CG2924;CG30377;CG32066;CG32264;CG32365;CG32369;CG32521;CG32767;CG32772;CG32982;CG33144;CG34383;CG34417;CG3726;CG42238;CG4224…
5kbUpTx	jim_w001	flyfactorsurvey__jim_F1-9_SOLEXA_2.5_FBgn0027339	4.47	0.0552	jim	**	jim (directAnnotation).	rn; sqz (inferredBy_MotifSimilarity).	268	826	14-3-3zeta;aay;Act5C;AGO1;AMPdeam;aop;Aps;ASPP;Atf3;Atg8a;Atpalpha;Atx2;baz;bbg;BCL7-like;ben;bowl;br;brat;Bsg;Btk29A;btsz;bun;CadN;Cam;CanA-14F;Caper;caps;cdc14;ced-6;CG10082;CG10543;CG11122;CG11486;CG11811;CG13868;CG13907;CG14073;CG15822;CG1677;CG16791;CG2865;CG2924;CG30377;CG32264;CG32365;CG32369;CG32521;CG32767;CG32772;CG32982;CG33144;CG34383;CG34417;CG3726;CG42238;CG42240;CG42673;CG43658;CG4…
5kbUpTx	jim_w001	cisbp__M5049	3.98	0.0521	jim	**	jim (directAnnotation).		557	2468	14-3-3epsilon;14-3-3zeta;aay;Abl;Act5C;AGO1;alc;Alh;alpha-Est9;alpha-Spec;AMPdeam;aop;AP-1gamma;apt;Argk;Arp2;ASPP;Atf3;Atg6;Atg8a;atl;Atpalpha;Atx2;B4;barc;baz;bbg;BCL7-like;ben;beta-Spec;betaTub97EF;bic;bowl;br;brat;bru2;BRWD3;Bsg;Btk29A;btsz;bun;C3G;CadN;Cam;CanA-14F;CanB2;CAP;Caper;Capr;caps;capu;cdc14;CdGAPr;cdi;ced-6;CenG1A;cg;CG10077;CG10082;CG10479;CG10543;CG11050;CG11122;CG11486;CG11811;…
5kbUpTx	jim_w005	tfdimers__MD00560	3.3	0.145	jim	**	jim (inferredBy_Orthology).		4	62	ct;hdc;jim;pum
5kbUpTx	jim_w005	transfac_pro__M06545	3.02	0.137	jim	**	jim (inferredBy_Orthology).		4	93	CG43759;ct;hdc;RapGAP1
5kbUpTx	Jra_top50	hocomoco__JUNB_HUMAN.H10MO.C	9.63	0.2	Jra	**	Jra (inferredBy_Orthology).	cnc; kay; mor (inferredBy_MotifSimilarity_n_Orthology).	41	3693	CG10916;CG11426;CG13314;CG1572;CG2765;CG30154;CG31710;CG4101;CG5835;CG9801;cindr;dia;Fas1;hebe;hid;Hr4;ifc;insc;Jra;Klp64D;Lac;Lapsyn;Mlc-c;moody;pcs;prominin-like;puc;Rab8;RhoGDI;sky;Spn55B;sqh;Swip-1;Tsp42Ec;Tsp42Ee;Tsp42Ef;vari;vsg;Vta1;WASp;Xrp1
5kbUpTx	Jra_top50	hocomoco__FOSL2_HUMAN.H10MO.A	9.44	0.196	Jra	*	kay (inferredBy_Orthology).	Jra; cnc; mor (inferredBy_MotifSimilarity_n_Orthology).	44	4448	AMPdeam;CG10916;CG11426;CG13314;CG1572;CG2765;CG30154;CG31710;CG4101;CG5835;CG9801;cindr;dia;Fas1;hebe;hid;Hr4;ifc;insc;Jra;Klp64D;Lac;Lapsyn;Mlc-c;moody;pcs;prominin-like;puc;Rab8;RhoGDI;sky;Smg6;Spn55B;sqh;Swip-1;Tsp42Ec;Tsp42Ee;Tsp42Ef;vari;vsg;Vta1;WASp;Xrp1;ZnT63C
5kbUpTx	Jra_top50	homer__NNATGASTCATH_Fra1	8.79	0.184	Jra	*		Jra; kay (inferredBy_MotifSimilarity). cnc; mor (inferredBy_MotifSimilarity_n_Orthology).	38	3469	CG10916;CG11426;CG13314;CG2765;CG31710;CG4101;CG5835;CG9801;cindr;dia;Fas1;hebe;hid;Hr4;ifc;insc;Jra;Klp64D;Lac;Lapsyn;Mlc-c;moody;pcs;prominin-like;puc;Rab8;RhoGAP68F;RhoGDI;sky;Spn55B;sqh;Swip-1;Tsp42Ec;Tsp42Ef;vari;Vta1;WASp;Xrp1
5kbUpTx	Jra_top50	cisbp__M6230	8.67	0.182	Jra	*	kay (inferredBy_Orthology).	Jra; cnc; mor (inferredBy_MotifSimilarity_n_Orthology).	42	4214	AMPdeam;CG10916;CG11426;CG13314;CG1572;CG2765;CG31710;CG4101;CG5835;CG9801;cindr;dia;Fas1;hebe;hid;Hr4;ifc;insc;Jra;Klp64D;Lac;Lapsyn;Mlc-c;pcs;prominin-like;puc;Rab8;RhoGAP68F;RhoGDI;sky;Smg6;Spn55B;sqh;Swip-1;Tsp42Ec;Tsp42Ee;Tsp42Ef;vari;vsg;Vta1;WASp;Xrp1
5kbUpTx	Jra_top50	yetfasco__YEL009C_1363	8.6	0.18	Jra	*		Jra; kay (inferredBy_MotifSimilarity). NFAT; cnc; maf-S; tj (inferredBy_MotifSimilarity_n_Orthology).	27	1518	CG11426;CG13314;CG4101;CG5835;CG9801;cindr;Fas1;hebe;hid;Hr4;ifc;insc;Jra;Lac;Lapsyn;Mlc-c;pcs;puc;Rab8;sky;sqh;Swip-1;Tsp42Ec;vari;Vta1;WASp;Xrp1
5kbUpTx	Jra_top50	transfac_pro__M02876	8.54	0.179	Jra	*		Jra; kay (inferredBy_MotifSimilarity).	30	2314	CG11426;CG13314;CG2765;CG4101;CG5835;CG9801;cindr;Fas1;hebe;hid;Hr4;insc;Jra;Klp64D;Lac;Lapsyn;Mlc-c;pcs;prominin-like;puc;Rab8;RhoGDI;sky;Smg6;Spn55B;sqh;Swip-1;vari;Vta1;Xrp1
5kbUpTx	Jra_top50	jaspar__MA0478.1	8.5	0.178	Jra	*	kay (inferredBy_Orthology).	Jra (inferredBy_MotifSimilarity). mor (inferredBy_MotifSimilarity_n_Orthology).	43	4308	AMPdeam;CG10916;CG11426;CG13314;CG2765;CG30154;CG31710;CG4101;CG5835;CG9801;cindr;dia;Fas1;hebe;hid;Hr4;ifc;insc;Jra;Klp64D;Lac;Lapsyn;Mlc-c;moody;pcs;prominin-like;puc;Rab8;RhoGDI;sky;Smg6;Spn55B;sqh;Swip-1;Tsp42Ec;Tsp42Ee;Tsp42Ef;vari;vsg;Vta1;WASp;Xrp1;ZnT63C
5kbUpTx	Jra_top50	scertf__spivak.GCN4	8.45	0.178	Jra	*		Jra; kay (inferredBy_MotifSimilarity). NFAT; cnc (inferredBy_MotifSimilarity_n_Orthology).	43	4665	CG10916;CG11426;CG13314;CG2765;CG30154;CG31710;CG4101;CG5835;CG9801;cindr;dia;Fas1;hebe;hid;Hr4;ifc;insc;Jra;Klp64D;Lac;Lapsyn;Mlc-c;moody;Nep2;pcs;prominin-like;puc;Rab8;RhoGAP68F;RhoGDI;sky;Smg6;Spn55B;sqh;Swip-1;Tsp42Ec;Tsp42Ee;Tsp42Ef;vari;vsg;Vta1;WASp;Xrp1
5kbUpTx	Jra_top50	homer__DATGASTCAT_BATF	8.44	0.177	Jra	*		Jra; kay (inferredBy_MotifSimilarity). NFAT (inferredBy_MotifSimilarity_n_Orthology).	32	2579	CG11426;CG13314;CG2765;CG31710;CG4101;CG5835;CG9801;cindr;Fas1;hebe;hid;Hr4;ifc;insc;Jra;Lac;Lapsyn;Mlc-c;pcs;prominin-like;puc;Rab8;sky;Spn55B;sqh;Swip-1;Tsp42Ec;Tsp42Ef;vari;Vta1;WASp;Xrp1
5kbUpTx	Jra_top50	hocomoco__FOSL2_MOUSE.H10MO.A	8.44	0.177	Jra	*	kay (inferredBy_Orthology).	Jra; cnc; mor (inferredBy_MotifSimilarity_n_Orthology).	33	2579	CG11426;CG13314;CG2765;CG31710;CG4101;CG5835;CG9801;cindr;Fas1;hebe;hid;Hr4;ifc;insc;Jra;Lac;Lapsyn;Mlc-c;pcs;prominin-like;puc;Rab8;RhoGDI;sky;Spn55B;sqh;Swip-1;Tsp42Ec;Tsp42Ef;vari;Vta1;WASp;Xrp1
5kbUpTx	Jra_top50	factorbook__AP1	8.41	0.177	Jra	**	Jra; kay (inferredBy_Orthology).	mor (inferredBy_MotifSimilarity_n_Orthology).	37	2927	CG10916;CG11426;CG13314;CG2765;CG30154;CG31710;CG4101;CG5835;CG9801;cindr;dia;Fas1;hebe;hid;Hr4;ifc;insc;Jra;Lac;Lapsyn;Mlc-c;pcs;prominin-like;puc;Rab8;RhoGDI;sky;Spn55B;sqh;Swip-1;Tsp42Ec;Tsp42Ee;vari;vsg;Vta1;WASp;Xrp1
5kbUpTx	Jra_top50	cisbp__M6317	8.33	0.175	Jra	**	Jra (inferredBy_Orthology).	kay; mor (inferredBy_MotifSimilarity_n_Orthology).	31	2361	CG11426;CG13314;CG2765;CG31710;CG4101;CG5835;CG9801;cindr;Fas1;hebe;hid;Hr4;ifc;insc;Jra;Lac;Lapsyn;Mlc-c;moody;pcs;puc;Rab8;RhoGDI;sky;sqh;Swip-1;Tsp42Ec;vari;Vta1;WASp;Xrp1
5kbUpTx	Jra_top50	cisbp__M2280	8.33	0.175	Jra	*	kay (inferredBy_Orthology).	Jra (inferredBy_MotifSimilarity). maf-S; mor (inferredBy_MotifSimilarity_n_Orthology).	34	2579	CG10916;CG11426;CG13314;CG2765;CG30154;CG31710;CG4101;CG5835;CG9801;cindr;dia;Fas1;hebe;hid;Hr4;ifc;insc;Jra;Lac;Lapsyn;Mlc-c;pcs;prominin-like;puc;Rab8;RhoGDI;sky;Spn55B;sqh;Swip-1;Tsp42Ef;vari;Vta1;Xrp1
5kbUpTx	Jra_top50	jaspar__MA0490.1	8.26	0.174	Jra	**	Jra (inferredBy_Orthology).	kay (inferredBy_MotifSimilarity). mor (inferredBy_MotifSimilarity_n_Orthology).	43	4188	AMPdeam;CG10916;CG11426;CG13314;CG2765;CG30154;CG31710;CG4101;CG5835;CG9801;cindr;dia;Fas1;GATAd;hebe;hid;Hr4;ifc;insc;Jra;Klp64D;Lac;Lapsyn;Mlc-c;moody;pcs;prominin-like;puc;Rab8;RhoGDI;sky;Spn55B;sqh;Swip-1;Tsp42Ec;Tsp42Ee;Tsp42Ef;vari;vsg;Vta1;WASp;Xrp1;ZnT63C
5kbUpTx	Jra_top50	cisbp__M4570	8.1	0.171	Jra	**	Jra (inferredBy_Orthology).	cnc; kay; mor (inferredBy_MotifSimilarity_n_Orthology).	37	2800	CG10916;CG11426;CG13314;CG2765;CG30154;CG31710;CG4101;CG5835;cindr;dia;Fas1;hebe;hid;Hr4;ifc;insc;Jra;Lac;Lapsyn;Mlc-c;pcs;prominin-like;puc;Rab8;RhoGAP68F;RhoGDI;sky;Spn55B;sqh;Swip-1;Tsp42Ec;Tsp42Ef;vari;vsg;Vta1;WASp;Xrp1
5kbUpTx	Jra_top50	swissregulon__sacCer__GCN4	8.04	0.17	Jra	*		Jra; kay (inferredBy_MotifSimilarity). NFAT; cnc (inferredBy_MotifSimilarity_n_Orthology).	29	2248	CG11426;CG13314;CG2765;CG4101;CG5835;CG9801;cindr;Fas1;hebe;hid;Hr4;insc;Jra;Lac;Lapsyn;Mlc-c;pcs;prominin-like;puc;Rab8;RhoGDI;sky;Spn55B;sqh;Swip-1;Tsp42Ef;vari;Vta1;Xrp1
5kbUpTx	Jra_top50	cisbp__M4619	8	0.169	Jra	*	kay (inferredBy_Orthology).	Jra (inferredBy_MotifSimilarity). mor (inferredBy_MotifSimilarity_n_Orthology).	41	3456	CG10916;CG11426;CG13314;CG2765;CG30154;CG31710;CG4101;CG5835;CG9801;cindr;dia;Fas1;hebe;hid;Hr4;ifc;insc;Jra;Klp64D;Lac;Lapsyn;Mlc-c;pcs;prominin-like;puc;Rab8;RhoGDI;sky;Smg6;Spn55B;sqh;Swip-1;Tsp42Ec;Tsp42Ee;Tsp42Ef;vari;vsg;Vta1;WASp;Xrp1;ZnT63C
5kbUpTx	Jra_top50	cisbp__M2291	7.99	0.169	Jra	**	Jra (inferredBy_Orthology).	kay (inferredBy_MotifSimilarity). mor (inferredBy_MotifSimilarity_n_Orthology).	34	2202	CG11426;CG13314;CG2765;CG30154;CG31710;CG4101;CG5835;CG9801;cindr;dia;Fas1;hebe;hid;Hr4;ifc;insc;Jra;Lac;Lapsyn;Mlc-c;pcs;prominin-like;puc;Rab8;RhoGDI;sky;Spn55B;sqh;Swip-1;Tsp42Ec;Tsp42Ef;vari;Vta1;Xrp1
5kbUpTx	Jra_top50	cisbp__M4623	7.93	0.168	Jra	**	Jra (inferredBy_Orthology).	kay (inferredBy_MotifSimilarity). cnc (inferredBy_MotifSimilarity_n_Orthology).	45	4013	AMPdeam;CG10916;CG11426;CG13314;CG1572;CG2765;CG30154;CG31710;CG4101;CG5835;CG9801;cindr;dia;Fas1;GATAd;hebe;hid;Hr4;ifc;insc;Jra;Klp64D;Lac;Lapsyn;Mlc-c;moody;pcs;prominin-like;puc;Rab8;RhoGAP68F;RhoGDI;sky;Smg6;Spn55B;sqh;Swip-1;Tsp42Ec;Tsp42Ee;Tsp42Ef;vari;vsg;Vta1;WASp;Xrp1
5kbUpTx	Jra_top50	hocomoco__JUNB_MOUSE.H10MO.B	7.86	0.166	Jra	**	Jra (inferredBy_Orthology).	kay; mor (inferredBy_MotifSimilarity_n_Orthology).	30	2191	CG11426;CG13314;CG2765;CG31710;CG4101;CG5835;CG9801;cindr;Fas1;hebe;hid;Hr4;ifc;insc;Jra;Lac;Lapsyn;Mlc-c;moody;pcs;puc;Rab8;RhoGDI;sky;sqh;Swip-1;vari;Vta1;WASp;Xrp1
5kbUpTx	Jra_top50	cisbp__M4565	7.75	0.164	Jra	*	kay (inferredBy_Orthology).	Jra (inferredBy_MotifSimilarity).	39	3111	CG10916;CG11426;CG13314;CG2765;CG31710;CG4101;CG5835;CG9801;cindr;dia;Fas1;hebe;hid;Hr4;ifc;insc;Jra;Klp64D;Lac;Lapsyn;Mlc-c;pcs;prominin-like;puc;Rab8;RhoGAP68F;RhoGDI;sky;Spn55B;sqh;Swip-1;Tsp42Ec;Tsp42Ee;Tsp42Ef;vari;vsg;Vta1;WASp;Xrp1
5kbUpTx	Jra_top50	cisbp__M4590	7.72	0.164	Jra	*	kay (inferredBy_Orthology).	Jra; mor (inferredBy_MotifSimilarity_n_Orthology).	33	2191	CG10916;CG11426;CG2765;CG31710;CG4101;CG5835;CG9801;cindr;dia;Fas1;hebe;hid;Hr4;ifc;insc;Jra;Lac;Lapsyn;Mlc-c;pcs;prominin-like;puc;Rab8;RhoGDI;sky;Spn55B;sqh;Swip-1;Tsp42Ec;Tsp42Ef;vari;Vta1;Xrp1
5kbUpTx	Jra_top50	hocomoco__FOSL1_HUMAN.H10MO.A	7.65	0.162	Jra	*	kay (inferredBy_Orthology).	Jra (inferredBy_MotifSimilarity).	31	1941	CG11426;CG2765;CG31710;CG4101;CG5835;CG9801;cindr;Fas1;hebe;hid;Hr4;ifc;insc;Jra;Lac;Lapsyn;Mlc-c;pcs;prominin-like;puc;Rab8;RhoGDI;sky;Spn55B;sqh;Swip-1;Tsp42Ec;Tsp42Ef;vari;Vta1;Xrp1
5kbUpTx	Jra_top50	cisbp__M0344	7.64	0.162	Jra	*		Jra; kay (inferredBy_MotifSimilarity_n_Orthology).	33	2855	CG11426;CG13314;CG31710;CG4101;CG5835;CG9801;cindr;Fas1;hebe;hid;Hr4;ifc;insc;Jra;Lac;Lapsyn;Mlc-c;moody;pcs;prominin-like;puc;Rab8;sky;Smg6;Spn55B;sqh;Swip-1;Tsp42Ec;Tsp42Ef;vari;Vta1;WASp;Xrp1
5kbUpTx	Jra_top50	hocomoco__FOS_HUMAN.H10MO.A	7.61	0.162	Jra	*	kay (inferredBy_Orthology).	Jra (inferredBy_MotifSimilarity). cnc; mor (inferredBy_MotifSimilarity_n_Orthology).	31	1865	CG11426;CG2765;CG31710;CG4101;CG5835;CG9801;cindr;Fas1;hebe;hid;Hr4;ifc;insc;Jra;Lac;Lapsyn;Mlc-c;pcs;prominin-like;puc;Rab8;RhoGDI;sky;Spn55B;sqh;Swip-1;Tsp42Ec;Tsp42Ef;vari;Vta1;Xrp1
5kbUpTx	Jra_top50	cisbp__M4530	7.59	0.161	Jra	*	kay (inferredBy_Orthology).	Jra (inferredBy_MotifSimilarity_n_Orthology).	44	4188	AMPdeam;CG10916;CG11426;CG13314;CG1572;CG2765;CG30154;CG31710;CG4101;CG5835;CG9801;cindr;dia;Fas1;hebe;hid;Hr4;ifc;insc;Jra;Klp64D;Lac;Lapsyn;Mlc-c;moody;pcs;prominin-like;puc;Rab8;RhoGAP68F;RhoGDI;sky;Smg6;Spn55B;sqh;Swip-1;Tsp42Ec;Tsp42Ee;Tsp42Ef;vari;vsg;Vta1;WASp;Xrp1
5kbUpTx	Jra_top50	cisbp__M4607	7.55	0.161	Jra	*	kay (inferredBy_Orthology).	Jra (inferredBy_MotifSimilarity). cnc; maf-S (inferredBy_MotifSimilarity_n_Orthology).	42	3826	AMPdeam;CG10916;CG11426;CG13314;CG1572;CG2765;CG30154;CG31710;CG4101;CG5835;CG9801;cindr;dia;Fas1;hebe;hid;Hr4;ifc;insc;Jra;Klp64D;Lac;Lapsyn;Mlc-c;pcs;prominin-like;puc;Rab8;RhoGAP68F;RhoGDI;sky;Spn55B;sqh;Swip-1;Tsp42Ec;Tsp42Ee;Tsp42Ef;vari;vsg;Vta1;WASp;Xrp1
5kbUpTx	Jra_top50	transfac_pro__M01555	7.52	0.16	Jra	*		Jra; kay (inferredBy_MotifSimilarity_n_Orthology).	40	4442	CG10916;CG11426;CG13314;CG2765;CG31710;CG4101;CG5835;CG9801;cindr;dia;Fas1;hebe;hid;Hr4;ifc;insc;Jra;Klp64D;Lac;Lapsyn;Mlc-c;moody;pcs;prominin-like;puc;Rab8;RhoGDI;sky;Smg6;Spn55B;sqh;Swip-1;Tsp42Ec;Tsp42Ee;Tsp42Ef;vari;vsg;Vta1;WASp;Xrp1
5kbUpTx	Jra_top50	cisbp__M2428	7.47	0.159	Jra	*		Jra; kay (inferredBy_MotifSimilarity_n_Orthology).	32	2191	AMPdeam;CG11426;CG1572;CG2765;CG31710;CG4101;CG5835;CG9801;cindr;Fas1;hebe;hid;Hr4;ifc;insc;Jra;Lac;Lapsyn;Mlc-c;Nep2;pcs;prominin-like;puc;Rab8;sky;Spn55B;sqh;Swip-1;vari;Vta1;WASp;Xrp1
5kbUpTx	Jra_top50	transfac_public__M00038	7.44	0.159	Jra	*		Jra; kay; mor (inferredBy_MotifSimilarity_n_Orthology).	32	2376	AMPdeam;CG11426;CG1572;CG2765;CG31710;CG4101;CG5835;CG9801;cindr;Fas1;hebe;hid;Hr4;ifc;insc;Jra;Lac;Lapsyn;Mlc-c;Nep2;pcs;prominin-like;puc;Rab8;sky;Spn55B;sqh;Swip-1;vari;Vta1;WASp;Xrp1
5kbUpTx	Jra_top50	cisbp__M2108	7.44	0.159	Jra	*		Jra; kay (inferredBy_MotifSimilarity_n_Orthology).	28	1941	CG11426;CG13314;CG2765;CG4101;CG5835;CG9801;cindr;Fas1;hebe;hid;Hr4;insc;Jra;Klp64D;Lac;Lapsyn;Mlc-c;pcs;prominin-like;puc;Rab8;RhoGDI;sky;sqh;Swip-1;vari;Vta1;Xrp1
5kbUpTx	Jra_top50	hocomoco__JUN_HUMAN.H10MO.A	7.34	0.157	Jra	**	Jra (inferredBy_Orthology).	kay (inferredBy_MotifSimilarity). cnc; mor (inferredBy_MotifSimilarity_n_Orthology).	36	2707	CG10916;CG11426;CG13314;CG2765;CG31710;CG4101;CG5835;CG9801;cindr;dia;Fas1;hebe;hid;Hr4;ifc;insc;Jra;Lac;Lapsyn;Mlc-c;moody;pcs;prominin-like;puc;Rab8;RhoGDI;sky;Spn55B;sqh;Swip-1;Tsp42Ec;Tsp42Ef;vari;Vta1;WASp;Xrp1
5kbUpTx	Jra_top50	homer__DATGASTCATHN_Atf3	7.3	0.156	Jra	*		Jra; kay (inferredBy_MotifSimilarity).	32	2199	CG11426;CG2765;CG31710;CG4101;CG5835;CG9801;cindr;dia;Fas1;hebe;hid;Hr4;ifc;insc;Jra;Lac;Lapsyn;Mlc-c;pcs;prominin-like;puc;Rab8;RhoGDI;sky;Spn55B;sqh;Swip-1;Tsp42Ec;Tsp42Ef;vari;Vta1;Xrp1
5kbUpTx	Jra_top50	jaspar__MA0303.1	7.28	0.156	Jra	*		Jra; kay (inferredBy_MotifSimilarity_n_Orthology).	42	4963	CG10660;CG10916;CG11426;CG13314;CG2765;CG31710;CG4101;CG5835;CG9801;cindr;dia;Fas1;hebe;hid;Hr4;ifc;insc;Jra;Klp64D;Lac;Lapsyn;Mlc-c;moody;Nep2;pcs;prominin-like;puc;Rab8;RhoGDI;sky;Smg6;Spn55B;sqh;Swip-1;Tsp42Ec;Tsp42Ee;Tsp42Ef;vari;vsg;Vta1;WASp;Xrp1
5kbUpTx	Jra_top50	hocomoco__FOSL1_MOUSE.H10MO.C	7.2	0.154	Jra	*	kay (inferredBy_Orthology).	Jra (inferredBy_MotifSimilarity). mor (inferredBy_MotifSimilarity_n_Orthology).	41	4113	CG10916;CG11426;CG13314;CG1572;CG2765;CG30154;CG31710;CG4101;CG5835;CG9801;cindr;dia;Fas1;hebe;hid;Hr4;ifc;insc;Jra;Klp64D;Lac;Lapsyn;Mlc-c;pcs;prominin-like;puc;Rab8;RhoGAP68F;RhoGDI;sky;Spn55B;sqh;Swip-1;Tsp42Ec;Tsp42Ee;Tsp42Ef;vari;vsg;Vta1;WASp;Xrp1
5kbUpTx	Jra_top50	cisbp__M2979	7.19	0.154	Jra	*	cnc (inferredBy_Orthology).	Jra (inferredBy_MotifSimilarity_n_Orthology).	37	3456	AMPdeam;CG10916;CG11426;CG13314;CG2765;CG31710;CG4101;CG5835;CG9801;cindr;dia;Fas1;hebe;hid;Hr4;ifc;insc;Jra;Lac;Lapsyn;Mlc-c;moody;pcs;prominin-like;puc;Rab8;sky;Smg6;Spn55B;sqh;Swip-1;Tsp42Ef;vari;Vta1;WASp;Xrp1;ZnT63C
5kbUpTx	Jra_top50	transfac_public__M00495	7.17	0.154	Jra	*	cnc (inferredBy_Orthology).	Jra (inferredBy_MotifSimilarity_n_Orthology).	39	3915	AMPdeam;CG10916;CG11426;CG13314;CG2765;CG31710;CG4101;CG5835;CG9801;cindr;dia;Fas1;hebe;hid;Hr4;ifc;insc;Jra;Klp64D;Lac;Lapsyn;Mlc-c;moody;pcs;prominin-like;puc;Rab8;RhoGDI;sky;Smg6;Spn55B;sqh;Swip-1;Tsp42Ef;vari;Vta1;WASp;Xrp1;ZnT63C
5kbUpTx	Jra_top50	cisbp__M6319	7.16	0.153	Jra	**	Jra (inferredBy_Orthology).	kay (inferredBy_MotifSimilarity). cnc; mor (inferredBy_MotifSimilarity_n_Orthology).	36	2768	CG10916;CG11426;CG13314;CG2765;CG31710;CG4101;CG5835;CG9801;cindr;dia;Fas1;hebe;hid;Hr4;ifc;insc;Jra;Lac;Lapsyn;Mlc-c;moody;pcs;prominin-like;puc;Rab8;RhoGDI;sky;Spn55B;sqh;Swip-1;Tsp42Ec;Tsp42Ef;vari;Vta1;WASp;Xrp1
5kbUpTx	Jra_top50	cisbp__M4506	7.08	0.152	Jra	**	Jra (inferredBy_Orthology).	kay (inferredBy_MotifSimilarity). cnc; mor (inferredBy_MotifSimilarity_n_Orthology).	40	3612	AMPdeam;CG10916;CG11426;CG13314;CG2765;CG30154;CG31710;CG4101;CG5835;CG9801;cindr;dia;Fas1;hebe;hid;Hr4;ifc;insc;Jra;Klp64D;Lac;Lapsyn;Mlc-c;pcs;prominin-like;puc;Rab8;RhoGDI;sky;Spn55B;sqh;Swip-1;Tsp42Ec;Tsp42Ee;Tsp42Ef;vari;vsg;Vta1;WASp;Xrp1
5kbUpTx	Jra_top50	transfac_pro__M04693	7.06	0.152	Jra	*	kay (inferredBy_Orthology).	Jra (inferredBy_MotifSimilarity). NFAT; cnc (inferredBy_MotifSimilarity_n_Orthology).	33	2376	CG11426;CG13314;CG2765;CG31710;CG4101;CG5835;cindr;dia;Fas1;hebe;hid;Hr4;ifc;insc;Jra;Lac;Lapsyn;Mlc-c;pcs;prominin-like;puc;Rab8;RhoGDI;sky;Spn55B;sqh;Swip-1;Tsp42Ee;Tsp42Ef;vari;vsg;Vta1;Xrp1
5kbUpTx	Jra_top50	cisbp__M2292	7.06	0.152	Jra	**	Jra (inferredBy_Orthology).	kay (inferredBy_MotifSimilarity). mor (inferredBy_MotifSimilarity_n_Orthology).	43	4096	AMPdeam;CG10916;CG11426;CG13314;CG2765;CG30154;CG31710;CG4101;CG5835;CG9801;cindr;dia;Fas1;hebe;hid;Hr4;ifc;insc;Jra;Klp64D;Lac;Lapsyn;Mlc-c;moody;pcs;prominin-like;puc;Rab8;RhoGAP68F;RhoGDI;sky;Smg6;Spn55B;sqh;Swip-1;Tsp42Ec;Tsp42Ee;Tsp42Ef;vari;vsg;Vta1;WASp;Xrp1
5kbUpTx	Jra_top50	cisbp__M4531	7.06	0.151	Jra	**	Jra (inferredBy_Orthology).	kay (inferredBy_MotifSimilarity).	33	2460	CG11426;CG2765;CG31710;CG4101;CG5835;CG9801;cindr;dia;Fas1;hebe;hid;Hr4;ifc;insc;Jra;Lac;Lapsyn;Mlc-c;pcs;prominin-like;puc;Rab8;RhoGDI;sky;Spn55B;sqh;Swip-1;Tsp42Ec;Tsp42Ef;vari;Vta1;WASp;Xrp1
5kbUpTx	Jra_top50	swissregulon__hs__FOS_FOS_B_L1__JUN_B_D_.p2	7.06	0.151	Jra	**	Jra; kay (inferredBy_Orthology).	mor (inferredBy_MotifSimilarity_n_Orthology).	38	3233	CG11426;CG13314;CG2765;CG30154;CG31710;CG4101;CG5835;CG9801;cindr;dia;Fas1;hebe;hid;Hr4;ifc;insc;Jra;Lac;Lapsyn;Mlc-c;moody;pcs;prominin-like;puc;Rab8;RhoGDI;sky;Spn55B;sqh;Swip-1;Tsp42Ec;Tsp42Ee;vari;vsg;Vta1;WASp;Xrp1;ZnT63C
5kbUpTx	Jra_top50	jaspar__MA0491.1	7.01	0.151	Jra	**	Jra (inferredBy_Orthology).	kay (inferredBy_MotifSimilarity). mor (inferredBy_MotifSimilarity_n_Orthology).	44	4096	AMPdeam;CG10916;CG11426;CG1572;CG2765;CG30154;CG31710;CG4101;CG5835;CG9801;cindr;dia;Fas1;hebe;hid;Hr4;ifc;insc;Jra;Klp64D;Lac;Lapsyn;Mlc-c;moody;Nep2;pcs;prominin-like;puc;Rab8;RhoGAP68F;RhoGDI;sky;Smg6;Spn55B;sqh;Swip-1;Tsp42Ec;Tsp42Ee;Tsp42Ef;vari;vsg;Vta1;WASp;Xrp1
5kbUpTx	Jra_top50	homer__ATGACTCATC_AP-1	6.99	0.15	Jra	**	Jra (inferredBy_Orthology).	kay (inferredBy_MotifSimilarity). cnc; maf-S; mor (inferredBy_MotifSimilarity_n_Orthology).	35	2745	CG11426;CG13314;CG2765;CG31710;CG4101;CG5835;CG9801;cindr;Fas1;hebe;hid;Hr4;ifc;insc;Jra;Lac;Lapsyn;Mlc-c;pcs;prominin-like;puc;Rab8;RhoGAP68F;RhoGDI;sky;Spn55B;sqh;Swip-1;Tsp42Ec;Tsp42Ef;vari;vsg;Vta1;WASp;Xrp1
5kbUpTx	Jra_top50	taipale__Jdp2_DBD_ATGASTCAT_repr	6.98	0.15	Jra	*		kay (inferredBy_MotifSimilarity). Jra; cnc (inferredBy_MotifSimilarity_n_Orthology).	42	4308	AMPdeam;CG10916;CG11426;CG13314;CG2765;CG4101;CG5835;CG9801;cindr;dia;Fas1;hebe;hid;Hr4;ifc;insc;Jra;Klp64D;Lac;Lapsyn;Mlc-c;moody;Nep2;pcs;prominin-like;puc;Rab8;RhoGAP68F;RhoGDI;sky;Smg6;Spn55B;sqh;Swip-1;Tsp42Ec;Tsp42Ee;Tsp42Ef;vari;vsg;Vta1;WASp;Xrp1
5kbUpTx	Jra_top50	hocomoco__JUND_HUMAN.H10MO.A	6.98	0.15	Jra	**	Jra (inferredBy_Orthology).	kay (inferredBy_MotifSimilarity). cnc (inferredBy_MotifSimilarity_n_Orthology).	43	4613	AMPdeam;CG10916;CG11426;CG13314;CG2765;CG30154;CG31710;CG4101;CG5835;CG9801;cindr;dia;Fas1;hebe;hid;Hr4;ifc;insc;Jra;Klp64D;Lac;Lapsyn;Mlc-c;moody;pcs;prominin-like;puc;Rab8;RhoGAP68F;RhoGDI;sky;Smg6;Spn55B;sqh;Swip-1;Tsp42Ec;Tsp42Ee;Tsp42Ef;vari;vsg;Vta1;WASp;Xrp1
5kbUpTx	Jra_top50	cisbp__M4684	6.97	0.15	Jra	*		Jra; kay (inferredBy_MotifSimilarity). cnc (inferredBy_MotifSimilarity_n_Orthology).	37	2943	CG10916;CG11426;CG13314;CG2765;CG31710;CG4101;CG5835;cindr;dia;Fas1;hebe;hid;Hr4;ifc;insc;Jra;Lac;Lapsyn;Mlc-c;pcs;prominin-like;puc;Rab8;RhoGDI;sky;Smg6;Spn55B;sqh;Swip-1;Tsp42Ec;Tsp42Ee;Tsp42Ef;vari;vsg;Vta1;WASp;Xrp1
5kbUpTx	Jra_top50	cisbp__M4541	6.96	0.15	Jra	**	Jra (inferredBy_Orthology).	kay (inferredBy_MotifSimilarity).	36	2985	CG10916;CG11426;CG13314;CG2765;CG4101;CG5835;CG9801;cindr;dia;Fas1;hebe;hid;Hr4;ifc;insc;Jra;Klp64D;Lac;Lapsyn;Mlc-c;pcs;prominin-like;puc;Rab8;RhoGDI;sky;Smg6;Spn55B;sqh;Swip-1;Tsp42Ec;Tsp42Ef;vari;vsg;Vta1;Xrp1
5kbUpTx	Jra_top50	cisbp__M5589	6.94	0.149	Jra	*		kay (inferredBy_MotifSimilarity). Jra; cnc (inferredBy_MotifSimilarity_n_Orthology).	39	4188	CG10916;CG11426;CG13314;CG2765;CG4101;CG5835;cindr;dia;Fas1;hebe;hid;Hr4;ifc;insc;Jra;Klp64D;Lac;Lapsyn;Mlc-c;moody;Nep2;pcs;prominin-like;puc;Rab8;RhoGAP68F;RhoGDI;sky;Smg6;Spn55B;sqh;Swip-1;Tsp42Ee;Tsp42Ef;vari;vsg;Vta1;WASp;Xrp1
5kbUpTx	Jra_top50	cisbp__M6318	6.92	0.149	Jra	**	Jra (inferredBy_Orthology).	kay (inferredBy_MotifSimilarity). cnc (inferredBy_MotifSimilarity_n_Orthology).	32	2201	CG11426;CG13314;CG2765;CG31710;CG4101;CG5835;CG9801;cindr;Fas1;hebe;hid;Hr4;ifc;insc;Jra;Lac;Lapsyn;Mlc-c;pcs;prominin-like;puc;Rab8;RhoGDI;sky;Spn55B;sqh;Swip-1;Tsp42Ec;vari;Vta1;WASp;Xrp1
5kbUpTx	Jra_top50	hocomoco__SMRC1_HUMAN.H10MO.D	6.89	0.148	Jra	*	mor (inferredBy_Orthology).	Jra; cnc; ewg; kay; maf-S; tj (inferredBy_MotifSimilarity_n_Orthology).	42	4569	AMPdeam;CG10916;CG11426;CG13314;CG1572;CG2765;CG30154;CG31710;CG4101;CG5835;CG9801;cindr;dia;Fas1;hebe;hid;Hr4;ifc;insc;Jra;Klp64D;Lac;Lapsyn;Mlc-c;Nep2;pcs;prominin-like;puc;Rab8;RhoGDI;sky;Spn55B;sqh;Swip-1;Tsp42Ec;Tsp42Ef;vari;vsg;Vta1;WASp;Xrp1;ZnT63C
5kbUpTx	Jra_top50	cisbp__M6038	6.88	0.148	Jra	*		kay (inferredBy_MotifSimilarity). Jra; cnc (inferredBy_MotifSimilarity_n_Orthology).	42	4542	AMPdeam;CG10916;CG11426;CG13314;CG2765;CG4101;CG5835;CG9801;cindr;dia;Fas1;hebe;hid;Hr4;ifc;insc;Jra;Klp64D;Lac;Lapsyn;Mlc-c;moody;Nep2;pcs;prominin-like;puc;Rab8;RhoGAP68F;RhoGDI;sky;Smg6;Spn55B;sqh;Swip-1;Tsp42Ec;Tsp42Ee;Tsp42Ef;vari;vsg;Vta1;WASp;Xrp1
5kbUpTx	Jra_top50	cisbp__M5587	6.83	0.147	Jra	*		Jra; kay (inferredBy_MotifSimilarity). cnc (inferredBy_MotifSimilarity_n_Orthology).	41	4963	AMPdeam;CG10916;CG11426;CG13314;CG2765;CG4101;CG5835;CG9801;cindr;Fas1;hebe;hid;Hr4;ifc;insc;Jra;Klp64D;Lac;Lapsyn;Mlc-c;moody;Nep2;pcs;prominin-like;puc;Rab8;RhoGAP68F;RhoGDI;sky;Smg6;Spn55B;sqh;Swip-1;Tsp42Ec;Tsp42Ee;Tsp42Ef;vari;vsg;Vta1;WASp;Xrp1
5kbUpTx	Jra_top50	jaspar__MA0476.1	6.81	0.147	Jra	*	kay (inferredBy_Orthology).	Jra (inferredBy_MotifSimilarity_n_Orthology).	43	4013	AMPdeam;CG10916;CG11426;CG13314;CG1572;CG2765;CG30154;CG31710;CG4101;CG5835;CG9801;cindr;dia;Fas1;GATAd;hebe;hid;Hr4;ifc;insc;Jra;Klp64D;Lac;Lapsyn;Mlc-c;pcs;prominin-like;puc;Rab8;RhoGAP68F;RhoGDI;sky;Spn55B;sqh;Swip-1;Tsp42Ec;Tsp42Ee;Tsp42Ef;vari;vsg;Vta1;WASp;Xrp1
5kbUpTx	Jra_top50	cisbp__M2980	6.81	0.147	Jra	*	cnc (inferredBy_Orthology).	Jra; kay (inferredBy_MotifSimilarity_n_Orthology).	33	2707	CG10916;CG11426;CG13314;CG2765;CG31710;CG4101;CG5835;CG9801;cindr;Fas1;hebe;hid;Hr4;ifc;insc;Jra;Lac;Lapsyn;Mlc-c;pcs;prominin-like;puc;Rab8;RhoGAP68F;RhoGDI;sky;Smg6;Spn55B;sqh;Swip-1;vari;Vta1;Xrp1
5kbUpTx	Jra_top50	cisbp__M2278	6.79	0.146	Jra	*	kay (inferredBy_Orthology).	Jra (inferredBy_MotifSimilarity_n_Orthology).	31	1673	CG11426;CG2765;CG31710;CG4101;CG5835;CG9801;cindr;dia;Fas1;hebe;hid;Hr4;insc;Jra;Lac;Lapsyn;Mlc-c;pcs;prominin-like;puc;Rab8;RhoGAP68F;RhoGDI;sky;Spn55B;sqh;Swip-1;Tsp42Ec;vari;Vta1;Xrp1
5kbUpTx	Jra_top50	cisbp__M4591	6.78	0.146	Jra	**	Jra (inferredBy_Orthology).	kay (inferredBy_MotifSimilarity). NFAT; mor (inferredBy_MotifSimilarity_n_Orthology).	43	4013	CG10916;CG11426;CG13314;CG2765;CG30154;CG31710;CG4101;CG5835;CG9801;cindr;dia;Fas1;GATAd;hebe;hid;Hr4;ifc;insc;Jra;Klp64D;Lac;Lapsyn;Mlc-c;moody;Nep2;pcs;prominin-like;puc;Rab8;RhoGDI;sky;Smg6;Spn55B;sqh;Swip-1;Tsp42Ec;Tsp42Ee;Tsp42Ef;vari;vsg;Vta1;WASp;Xrp1
5kbUpTx	Jra_top50	taipale__JDP2_DBD_ATGASTCAT	6.78	0.146	Jra	*		Jra; kay (inferredBy_MotifSimilarity). cnc (inferredBy_MotifSimilarity_n_Orthology).	40	4665	AMPdeam;CG10916;CG11426;CG13314;CG2765;CG4101;CG5835;CG9801;cindr;dia;Fas1;hebe;hid;Hr4;ifc;insc;Jra;Klp64D;Lac;Lapsyn;Mlc-c;moody;Nep2;pcs;prominin-like;puc;Rab8;RhoGDI;sky;Smg6;Spn55B;sqh;Swip-1;Tsp42Ec;Tsp42Ee;Tsp42Ef;vari;vsg;Vta1;Xrp1
5kbUpTx	Jra_top50	transfac_public__M00490	6.74	0.146	Jra	*	cnc (inferredBy_Orthology).	Jra; kay (inferredBy_MotifSimilarity_n_Orthology).	32	2456	CG10916;CG11426;CG13314;CG2765;CG31710;CG4101;CG5835;CG9801;cindr;Fas1;hebe;hid;Hr4;ifc;insc;Jra;Lac;Lapsyn;Mlc-c;pcs;prominin-like;puc;Rab8;RhoGAP68F;RhoGDI;Smg6;Spn55B;sqh;Swip-1;vari;Vta1;Xrp1
5kbUpTx	Jra_top50	hocomoco__FOSB_HUMAN.H10MO.C	6.73	0.145	Jra	*	kay (inferredBy_Orthology).	Jra (inferredBy_MotifSimilarity). cnc; mor (inferredBy_MotifSimilarity_n_Orthology).	36	2855	CG11426;CG13314;CG2765;CG30154;CG31710;CG4101;CG5835;CG9801;cindr;dia;Fas1;hebe;hid;Hr4;ifc;insc;Jra;Lac;Lapsyn;Mlc-c;pcs;prominin-like;puc;Rab8;RhoGDI;sky;Spn55B;sqh;Swip-1;Tsp42Ec;Tsp42Ef;vari;vsg;Vta1;WASp;Xrp1
5kbUpTx	Jra_top50	taipale__JDP2_full_ATGASTCAT	6.72	0.145	Jra	*		kay (inferredBy_MotifSimilarity). Jra; cnc (inferredBy_MotifSimilarity_n_Orthology).	41	4408	AMPdeam;CG10916;CG11426;CG13314;CG2765;CG4101;CG5835;CG9801;cindr;dia;Fas1;hebe;hid;Hr4;ifc;insc;Jra;Klp64D;Lac;Lapsyn;Mlc-c;moody;Nep2;pcs;prominin-like;puc;Rab8;RhoGDI;sky;Smg6;Spn55B;sqh;Swip-1;Tsp42Ec;Tsp42Ee;Tsp42Ef;vari;vsg;Vta1;WASp;Xrp1
5kbUpTx	Jra_top50	cisbp__M4526	6.66	0.144	Jra	*	mor (inferredBy_Orthology).	Jra; cnc; ewg; kay; maf-S; tj (inferredBy_MotifSimilarity_n_Orthology).	44	3759	AMPdeam;CG10916;CG11426;CG13314;CG1572;CG2765;CG30154;CG31710;CG4101;CG5835;CG9801;cindr;dia;Fas1;GATAd;hebe;hid;Hr4;ifc;insc;Jra;Klp64D;Lac;Lapsyn;Mlc-c;moody;pcs;prominin-like;puc;Rab8;RhoGAP68F;RhoGDI;sky;Spn55B;sqh;Swip-1;Tsp42Ec;Tsp42Ef;vari;vsg;Vta1;WASp;Xrp1;ZnT63C
5kbUpTx	Jra_top50	cisbp__M4625	6.65	0.144	Jra	**	Jra (inferredBy_Orthology).	kay (inferredBy_MotifSimilarity). mor (inferredBy_MotifSimilarity_n_Orthology).	35	2637	CG11426;CG13314;CG2765;CG31710;CG4101;CG5835;CG9801;cindr;dia;Fas1;hebe;hid;Hr4;ifc;insc;Jra;Klp64D;Lac;Lapsyn;Mlc-c;pcs;prominin-like;puc;Rab8;RhoGDI;sky;Spn55B;sqh;Swip-1;Tsp42Ec;Tsp42Ef;vari;Vta1;WASp;Xrp1
5kbUpTx	Jra_top50	cisbp__M4608	6.64	0.144	Jra	**	Jra (inferredBy_Orthology).	kay (inferredBy_MotifSimilarity). cnc (inferredBy_MotifSimilarity_n_Orthology).	38	3531	CG10916;CG11426;CG13314;CG2765;CG30154;CG31710;CG4101;CG5835;CG9801;cindr;dia;Fas1;hebe;hid;Hr4;ifc;insc;Jra;Lac;Lapsyn;Mlc-c;pcs;prominin-like;puc;Rab8;RhoGDI;sky;Spn55B;sqh;Swip-1;Tsp42Ec;Tsp42Ee;Tsp42Ef;vari;vsg;Vta1;WASp;Xrp1
5kbUpTx	Jra_top50	swissregulon__hs__BACH2.p2	6.6	0.143	Jra	*	cnc (inferredBy_Orthology).	Jra; kay; mor (inferredBy_MotifSimilarity_n_Orthology).	44	4613	AMPdeam;CG10916;CG11426;CG13314;CG1572;CG2765;CG30154;CG31710;CG4101;CG5835;CG9801;cindr;dia;Fas1;hebe;hid;Hr4;ifc;insc;Jra;Klp64D;Lac;Lapsyn;Mlc-c;moody;pcs;prominin-like;puc;Rab8;RhoGAP68F;RhoGDI;sky;Smg6;Spn55B;sqh;Swip-1;Tsp42Ec;Tsp42Ef;vari;vsg;Vta1;WASp;Xrp1;ZnT63C
5kbUpTx	Jra_top50	cisbp__M2290	6.54	0.142	Jra	**	Jra (inferredBy_Orthology).	kay (inferredBy_MotifSimilarity). NFAT; mor (inferredBy_MotifSimilarity_n_Orthology).	40	3667	CG10916;CG11426;CG13314;CG2765;CG30154;CG31710;CG4101;CG5835;CG9801;cindr;dia;Fas1;GATAd;hebe;hid;Hr4;ifc;insc;Jra;Klp64D;Lac;Lapsyn;Mlc-c;moody;pcs;prominin-like;puc;Rab8;RhoGDI;sky;Spn55B;sqh;Swip-1;Tsp42Ec;Tsp42Ef;vari;vsg;Vta1;WASp;Xrp1
5kbUpTx	Jra_top50	taipale__NFE2_DBD_NATGASTCATN	6.5	0.141	Jra	*	cnc (inferredBy_Orthology).	Jra; kay (inferredBy_MotifSimilarity_n_Orthology).	38	3546	AMPdeam;CG10916;CG11426;CG13314;CG2765;CG31710;CG4101;CG5835;CG9801;cindr;dia;Fas1;GATAd;hebe;hid;Hr4;insc;Jra;Klp64D;Lac;Lapsyn;Mlc-c;moody;prominin-like;puc;Rab8;sky;Smg6;Spn55B;sqh;Swip-1;Tsp42Ec;Tsp42Ee;Tsp42Ef;Vta1;WASp;Xrp1;ZnT63C
5kbUpTx	Jra_top50	jaspar__MA0489.1	6.45	0.14	Jra	**	Jra (inferredBy_Orthology).	kay (inferredBy_MotifSimilarity). NFAT; mor (inferredBy_MotifSimilarity_n_Orthology).	35	2456	CG11426;CG2765;CG30154;CG31710;CG4101;CG5835;CG9801;cindr;dia;Fas1;hebe;hid;Hr4;ifc;insc;Jra;Lac;Lapsyn;Mlc-c;moody;pcs;prominin-like;puc;Rab8;RhoGDI;sky;Spn55B;sqh;Swip-1;Tsp42Ec;Tsp42Ef;vari;Vta1;WASp;Xrp1
5kbUpTx	Jra_top50	homer__GATGACTCATCN_Jun-AP1	6.37	0.139	Jra	**	Jra (inferredBy_Orthology).	kay (inferredBy_MotifSimilarity). cnc; mor (inferredBy_MotifSimilarity_n_Orthology).	32	2191	CG11426;CG13314;CG2765;CG31710;CG4101;CG5835;CG9801;cindr;Fas1;hebe;hid;Hr4;ifc;insc;Jra;Lac;Lapsyn;Mlc-c;pcs;prominin-like;puc;Rab8;RhoGDI;sky;Spn55B;sqh;Swip-1;Tsp42Ec;Tsp42Ef;vari;Vta1;Xrp1
5kbUpTx	Jra_top50	transfac_pro__M04846	6.3	0.137	Jra	*		Jra; kay (inferredBy_MotifSimilarity).	33	4308	AMPdeam;CG11426;CG13314;CG2765;CG4101;CG5835;CG9801;cindr;dia;Fas1;hebe;hid;Hr4;ifc;insc;Jra;Lac;Lapsyn;Mlc-c;pcs;prominin-like;puc;Rab8;sky;Spn55B;sqh;Swip-1;Tsp42Ef;vari;vsg;Vta1;WASp;Xrp1
5kbUpTx	Jra_top50	cisbp__M5659	6.22	0.136	Jra	*	cnc (inferredBy_Orthology).	Jra; kay (inferredBy_MotifSimilarity_n_Orthology).	37	4240	AMPdeam;CG10916;CG11426;CG13314;CG2765;CG4101;CG5835;CG9801;cindr;dia;Fas1;GATAd;hebe;hid;Hr4;ifc;insc;Jra;Klp64D;Lac;Lapsyn;Mlc-c;moody;pcs;prominin-like;puc;Rab8;sky;Smg6;Spn55B;sqh;Swip-1;Tsp42Ef;vsg;Vta1;WASp;Xrp1
5kbUpTx	Jra_top50	yetfasco__YIL056W_2091	6.16	0.135	Jra	*		Jra; kay (inferredBy_MotifSimilarity). cnc; mor (inferredBy_MotifSimilarity_n_Orthology).	42	4188	AMPdeam;CG10916;CG11426;CG13314;CG2765;CG30154;CG31710;CG4101;CG5835;CG7130;CG9801;cindr;dia;Fas1;hebe;hid;Hr4;ifc;insc;Jra;Klp64D;Lac;Lapsyn;Mlc-c;pcs;prominin-like;puc;Rab8;RhoGAP68F;RhoGDI;sky;Spn55B;sqh;Swip-1;Tsp42Ec;Tsp42Ee;Tsp42Ef;vari;Vta1;WASp;Xrp1;ZnT63C
5kbUpTx	Jra_top50	transfac_pro__M03866	6.16	0.135	Jra	**	Jra; kay (inferredBy_Orthology).	mor (inferredBy_MotifSimilarity_n_Orthology).	32	2376	CG11426;CG13314;CG2765;CG31710;CG4101;CG5835;CG9801;cindr;Fas1;hebe;hid;Hr4;ifc;insc;Jra;Lac;Lapsyn;Mlc-c;moody;pcs;puc;Rab8;RhoGAP68F;RhoGDI;sky;Spn55B;sqh;Swip-1;vari;Vta1;WASp;Xrp1
5kbUpTx	Jra_top50	cisbp__M2279	6.02	0.132	Jra	*	kay (inferredBy_Orthology).	Jra; mor (inferredBy_MotifSimilarity_n_Orthology).	46	4542	AMPdeam;CG10916;CG11426;CG13314;CG1572;CG2765;CG30154;CG31710;CG4101;CG5835;CG9801;cindr;dia;Fas1;GATAd;hebe;hid;Hr4;ifc;insc;Jra;Klp64D;Lac;Lapsyn;Mlc-c;moody;pcs;prominin-like;puc;Rab8;RhoGAP68F;RhoGDI;sky;Smg6;Spn55B;sqh;Swip-1;Tsp42Ec;Tsp42Ee;Tsp42Ef;vari;vsg;Vta1;WASp;Xrp1;ZnT63C
5kbUpTx	Jra_top50	flyfactorsurvey__kay_Jra_SANGER_5_FBgn0001291	5.96	0.131	Jra	**	Jra (directAnnotation).	kay (inferredBy_MotifSimilarity).	37	2992	CG11426;CG13314;CG2765;CG30154;CG31710;CG4101;CG5835;CG9801;cindr;dia;Fas1;hebe;hid;Hr4;ifc;insc;Jra;Klp64D;Lac;Lapsyn;Mlc-c;moody;pcs;prominin-like;puc;Rab8;RhoGDI;sky;Spn55B;sqh;Swip-1;Tsp42Ec;Tsp42Ef;vari;Vta1;WASp;Xrp1
5kbUpTx	Jra_top50	neph__UW.Motif.0001	5.96	0.131	Jra	*		kay (inferredBy_MotifSimilarity). Jra; cnc (inferredBy_MotifSimilarity_n_Orthology).	31	2044	CG11426;CG13314;CG2765;CG31710;CG4101;CG5835;CG9801;cindr;Fas1;hebe;hid;Hr4;ifc;insc;Jra;Lac;Lapsyn;Mlc-c;moody;pcs;puc;Rab8;RhoGDI;sky;sqh;Swip-1;Tsp42Ec;vari;Vta1;WASp;Xrp1
5kbUpTx	Jra_top50	cisbp__M6228	5.83	0.129	Jra	*	kay (inferredBy_Orthology).	Jra (inferredBy_MotifSimilarity_n_Orthology).	27	1818	CG11426;CG2765;CG31710;CG4101;CG5835;CG9801;cindr;Fas1;hebe;hid;Hr4;insc;Jra;Lac;Lapsyn;Mlc-c;pcs;puc;RhoGAP68F;RhoGDI;sky;sqh;Swip-1;vari;Vta1;Xrp1;ZnT63C
5kbUpTx	Jra_top50	transfac_pro__M07685	5.83	0.129	Jra	*	kay (directAnnotation).	Jra (inferredBy_MotifSimilarity).	35	2927	CG10916;CG11426;CG13314;CG2765;CG4101;CG5835;CG9801;cindr;dia;Fas1;hebe;hid;Hr4;insc;Jra;Klp64D;Lac;Lapsyn;Mlc-c;pcs;prominin-like;puc;Rab8;RhoGDI;sky;Smg6;Spn55B;sqh;Swip-1;Tsp42Ec;vari;vsg;Vta1;WASp;Xrp1
5kbUpTx	Jra_top50	cisbp__M5050	5.8	0.128	Jra	**	Jra (directAnnotation).	kay (inferredBy_MotifSimilarity).	37	2855	CG11426;CG13314;CG2765;CG30154;CG31710;CG4101;CG5835;CG9801;cindr;dia;Fas1;hebe;hid;Hr4;ifc;insc;Jra;Klp64D;Lac;Lapsyn;Mlc-c;moody;pcs;prominin-like;puc;Rab8;RhoGDI;sky;Spn55B;sqh;Swip-1;Tsp42Ec;Tsp42Ef;vari;Vta1;WASp;Xrp1
5kbUpTx	Jra_top50	jaspar__MA0477.1	5.78	0.128	Jra	*	kay (inferredBy_Orthology).	Jra; mor (inferredBy_MotifSimilarity_n_Orthology).	48	4855	AMPdeam;CG10916;CG11426;CG13314;CG1572;CG2765;CG30154;CG31710;CG4101;CG5704;CG5835;CG9801;cindr;dia;Fas1;GATAd;hebe;hid;Hr4;ifc;insc;Jra;Klp64D;Lac;Lapsyn;Mlc-c;moody;Nep2;pcs;prominin-like;puc;Rab8;RhoGAP68F;RhoGDI;sky;Smg6;Spn55B;sqh;Swip-1;Tsp42Ec;Tsp42Ee;Tsp42Ef;vari;vsg;Vta1;WASp;Xrp1;ZnT63C
5kbUpTx	Jra_top50	homer__NATGASTCABNN_Fosl2	5.63	0.125	Jra	*	kay (inferredBy_Orthology).	Jra (inferredBy_MotifSimilarity). cnc; mor (inferredBy_MotifSimilarity_n_Orthology).	34	2637	CG11426;CG13314;CG2765;CG31710;CG4101;CG5835;CG9801;cindr;Fas1;hebe;hid;Hr4;ifc;insc;Jra;Lac;Lapsyn;Mlc-c;moody;pcs;prominin-like;puc;Rab8;RhoGAP68F;RhoGDI;sky;Spn55B;sqh;Swip-1;Tsp42Ef;vari;Vta1;WASp;Xrp1
5kbUpTx	Jra_top50	hocomoco__SMRC1_MOUSE.H10MO.B	5.62	0.125	Jra	*	mor (inferredBy_Orthology).	Jra; cnc; ewg; kay; maf-S; tj (inferredBy_MotifSimilarity_n_Orthology).	41	3826	CG10916;CG11426;CG13314;CG2765;CG30154;CG31710;CG4101;CG5835;CG9801;cindr;dia;Fas1;hebe;hid;Hr4;ifc;insc;Jra;Lac;Lapsyn;Mlc-c;moody;Nep2;pcs;prominin-like;puc;Rab8;RhoGAP68F;RhoGDI;sky;Spn55B;sqh;Swip-1;Tsp42Ec;Tsp42Ee;Tsp42Ef;vari;vsg;Vta1;WASp;Xrp1
5kbUpTx	Jra_top50	yetfasco__YBL103C_1445	5.59	0.124	Jra	*		Jra; kay (inferredBy_MotifSimilarity).	36	4013	CG10916;CG11426;CG13314;CG2765;CG31710;CG4101;CG5835;CG9801;cindr;Fas1;hebe;hid;Hr4;ifc;insc;Jra;Klp64D;Lac;Lapsyn;Mlc-c;moody;pcs;prominin-like;puc;Rab8;RhoGDI;sky;Smg6;Spn55B;sqh;Swip-1;Tsp42Ef;vari;Vta1;WASp;Xrp1
5kbUpTx	Jra_top50	cisbp__M6467	5.57	0.124	Jra	*	mor (inferredBy_Orthology).	Jra; cnc; ewg; kay; maf-S; tj (inferredBy_MotifSimilarity_n_Orthology).	41	3895	CG10916;CG11426;CG13314;CG2765;CG30154;CG31710;CG4101;CG5835;CG9801;cindr;dia;Fas1;hebe;hid;Hr4;ifc;insc;Jra;Lac;Lapsyn;Mlc-c;moody;Nep2;pcs;prominin-like;puc;Rab8;RhoGAP68F;RhoGDI;sky;Spn55B;sqh;Swip-1;Tsp42Ec;Tsp42Ee;Tsp42Ef;vari;vsg;Vta1;WASp;Xrp1
5kbUpTx	Jra_top50	hocomoco__BATF_HUMAN.H10MO.S	5.52	0.123	Jra	*		Jra; kay (inferredBy_MotifSimilarity_n_Orthology).	33	2394	CG11426;CG13314;CG2765;CG31710;CG4101;CG5835;CG9801;cindr;Fas1;hebe;hid;Hr4;ifc;insc;Jra;Lac;Lapsyn;Mlc-c;pcs;puc;Rab8;RhoGAP68F;RhoGDI;sky;Spn55B;sqh;Swip-1;Tsp42Ec;Tsp42Ef;vari;Vta1;WASp;Xrp1
5kbUpTx	Jra_top50	cisbp__M6158	5.5	0.122	Jra	*		Jra; kay (inferredBy_MotifSimilarity_n_Orthology).	33	2456	CG11426;CG13314;CG2765;CG31710;CG4101;CG5835;CG9801;cindr;Fas1;hebe;hid;Hr4;ifc;insc;Jra;Lac;Lapsyn;Mlc-c;pcs;puc;Rab8;RhoGAP68F;RhoGDI;sky;Spn55B;sqh;Swip-1;Tsp42Ec;Tsp42Ef;vari;Vta1;WASp;Xrp1
5kbUpTx	Jra_top50	yetfasco__YER064C_2094	5.25	0.118	Jra	*		Jra; kay (inferredBy_MotifSimilarity). cnc (inferredBy_MotifSimilarity_n_Orthology).	33	2707	CG11426;CG13314;CG2765;CG31710;CG4101;CG5835;CG9801;cindr;Fas1;hebe;hid;Hr4;ifc;insc;Jra;Klp64D;Lac;Lapsyn;Mlc-c;pcs;prominin-like;puc;Rab8;sky;Spn55B;sqh;Swip-1;Tsp42Ec;Tsp42Ef;vari;Vta1;WASp;Xrp1
5kbUpTx	Jra_top50	hocomoco__FOSB_MOUSE.H10MO.C	5.18	0.117	Jra	*	kay (inferredBy_Orthology).	Jra (inferredBy_MotifSimilarity_n_Orthology).	29	2044	CG11426;CG2765;CG31710;CG4101;CG5835;CG9801;cindr;Fas1;hebe;hid;Hr4;insc;Jra;Lac;Lapsyn;Mlc-c;moody;pcs;puc;RhoGAP68F;RhoGDI;sky;sqh;Swip-1;vari;Vta1;WASp;Xrp1;ZnT63C
5kbUpTx	Jra_top50	transfac_pro__M03869	5.1	0.115	Jra	*	kay (inferredBy_Orthology).	Jra; cnc; mor (inferredBy_MotifSimilarity_n_Orthology).	39	4188	CG10660;CG10916;CG11426;CG13314;CG2765;CG31710;CG4101;CG5835;CG9801;cindr;Fas1;hebe;hid;Hr4;ifc;insc;Jra;Klp64D;Lac;Lapsyn;Mlc-c;moody;pcs;prominin-like;puc;Rab8;RhoGAP68F;RhoGDI;sky;Spn55B;sqh;Swip-1;Tsp42Ec;Tsp42Ef;vari;vsg;Vta1;WASp;Xrp1
5kbUpTx	Jra_top50	transfac_public__M00199	5.09	0.115	Jra	**	Jra; kay (inferredBy_Orthology).		32	2407	CG11426;CG13314;CG2765;CG31710;CG4101;CG5835;CG9801;cindr;Fas1;hebe;hid;Hr4;ifc;insc;Jra;Lac;Lapsyn;Mlc-c;moody;pcs;puc;Rab8;RhoGAP68F;RhoGDI;sky;Spn55B;sqh;Swip-1;vari;Vta1;WASp;Xrp1
5kbUpTx	Jra_top50	transfac_public__M00037	5.08	0.115	Jra	*	cnc; maf-S (inferredBy_Orthology).	Jra; ewg; kay; tj (inferredBy_MotifSimilarity_n_Orthology).	22	1783	CG31710;CG4101;CG5835;CG9801;cindr;hebe;hid;Hr4;ifc;insc;Jra;Lac;Lapsyn;pcs;prominin-like;puc;sky;sqh;Swip-1;vari;Vta1;WASp
5kbUpTx	Jra_top50	elemento__TGACTCA	4.95	0.112	Jra	*		Jra (inferredBy_MotifSimilarity_n_Orthology).	28	1647	CG11426;CG13314;CG31710;CG4101;CG5835;cindr;Fas1;hebe;hid;Hr4;ifc;insc;Jra;Lac;Lapsyn;Mlc-c;pcs;puc;Rab8;RhoGDI;sky;sqh;Swip-1;Tsp42Ec;vari;Vta1;WASp;Xrp1
5kbUpTx	Jra_top50	cisbp__M0352	4.93	0.112	Jra	*		kay (inferredBy_MotifSimilarity). Jra (inferredBy_MotifSimilarity_n_Orthology).	29	2863	CG10916;CG11426;CG13314;CG2765;CG4101;CG5835;CG9801;cindr;Fas1;hebe;hid;Hr4;insc;Jra;Lac;Lapsyn;Mlc-c;moody;pcs;puc;Rab8;RhoGDI;sky;Spn55B;sqh;Swip-1;Vta1;WASp;Xrp1
5kbUpTx	Jra_top50	homer__TGCTGAGTCA_Bach2	4.89	0.111	Jra	*	cnc (inferredBy_Orthology).	Jra; kay; maf-S; tj (inferredBy_MotifSimilarity_n_Orthology).	35	3826	AMPdeam;CG10660;CG11426;CG13314;CG1572;CG31710;CG4101;CG5835;CG9801;cindr;Fas1;GATAd;hebe;hid;Hr4;ifc;insc;Jra;Klp64D;Lac;Lapsyn;Mlc-c;pcs;prominin-like;puc;Rab8;sky;sqh;Swip-1;Tsp42Ec;vari;vsg;Vta1;WASp;Xrp1
5kbUpTx	Jra_top50	transfac_pro__M01267	4.8	0.109	Jra	*	kay (inferredBy_Orthology).	Jra (inferredBy_MotifSimilarity_n_Orthology).	28	1783	CG11426;CG13314;CG2765;CG31710;CG4101;cindr;Fas1;hebe;hid;Hr4;ifc;insc;Jra;Lac;Lapsyn;Mlc-c;moody;pcs;puc;Rab8;RhoGDI;sky;sqh;Swip-1;vari;Vta1;WASp;Xrp1
5kbUpTx	Jra_top50	transfac_pro__M07400	4.8	0.109	Jra	*		Jra; kay (inferredBy_MotifSimilarity_n_Orthology).	30	1980	CG11426;CG2765;CG4101;CG5835;CG9801;cindr;dia;Fas1;hebe;hid;Hr4;insc;Jra;Lac;Lapsyn;Mlc-c;moody;pcs;puc;Rab8;RhoGAP68F;RhoGDI;sky;sqh;Swip-1;Tsp42Ec;vsg;Vta1;WASp;Xrp1
5kbUpTx	Jra_top50	transfac_pro__M07600	4.73	0.108	Jra	*	kay (inferredBy_Orthology).	Jra (inferredBy_MotifSimilarity_n_Orthology).	30	1941	CG11426;CG13314;CG2765;CG31710;CG4101;CG5835;CG9801;cindr;Fas1;hebe;hid;Hr4;ifc;insc;Jra;Lac;Lapsyn;Mlc-c;moody;pcs;puc;Rab8;RhoGDI;sky;sqh;Swip-1;vari;Vta1;WASp;Xrp1
5kbUpTx	Jra_top50	cisbp__M0320	4.61	0.106	Jra	**	Jra (inferredBy_Orthology).	kay (inferredBy_MotifSimilarity_n_Orthology).	37	4334	CG10660;CG11426;CG13314;CG1572;CG4101;CG5835;cindr;dia;Fas1;hebe;hid;Hr4;ifc;insc;Jra;Klp64D;Lac;Lapsyn;Mlc-c;pcs;prominin-like;puc;Rab8;RhoGDI;sky;Smg6;Spn55B;sqh;Swip-1;Tsp42Ec;Tsp42Ee;Tsp42Ef;vari;vsg;Vta1;WASp;Xrp1
5kbUpTx	Jra_top50	transfac_pro__M03551	4.61	0.106	Jra	**	Jra (inferredBy_Orthology).		27	1551	CG11426;CG13314;CG2765;CG31710;CG4101;CG5835;CG9801;cindr;Fas1;hid;Hr4;ifc;insc;Jra;Lac;Lapsyn;Mlc-c;pcs;puc;Rab8;RhoGDI;sky;sqh;Swip-1;vari;Vta1;Xrp1
5kbUpTx	Jra_top50	transfac_pro__M03552	4.6	0.106	Jra	**	Jra (inferredBy_Orthology).		26	1407	CG11426;CG13314;CG2765;CG31710;CG4101;CG5835;cindr;Fas1;hebe;hid;insc;Jra;Lac;Lapsyn;Mlc-c;moody;pcs;puc;Rab8;RhoGDI;sky;sqh;Swip-1;vari;Vta1;Xrp1
5kbUpTx	Jra_top50	transfac_pro__M00925	4.41	0.102	Jra	**	Jra; kay (inferredBy_Orthology).		30	2191	CG11426;CG13314;CG2765;CG31710;CG4101;CG5835;CG9801;cindr;Fas1;hebe;hid;Hr4;ifc;insc;Jra;Lac;Lapsyn;Mlc-c;moody;pcs;puc;Rab8;RhoGDI;sky;sqh;Swip-1;vari;Vta1;WASp;Xrp1
5kbUpTx	Jra_top50	transfac_pro__M00926	4.23	0.0989	Jra	**	Jra; kay (inferredBy_Orthology).		30	2283	CG11426;CG13314;CG2765;CG31710;CG4101;CG5835;CG9801;cindr;Fas1;hebe;hid;Hr4;ifc;insc;Jra;Lac;Lapsyn;Mlc-c;moody;pcs;puc;Rab8;RhoGDI;sky;sqh;Swip-1;Tsp42Ec;vari;Vta1;Xrp1
5kbUpTx	Jra_top50	transfac_pro__M02095	4.17	0.0976	Jra	*	kay (inferredBy_Orthology).	Jra (inferredBy_MotifSimilarity_n_Orthology).	31	2209	CG11426;CG13314;CG2765;CG31710;CG4101;CG5835;CG9801;cindr;Fas1;hebe;hid;Hr4;ifc;insc;Jra;Lac;Lapsyn;Mlc-c;pcs;puc;Rab8;RhoGAP68F;RhoGDI;sky;sqh;Swip-1;Tsp42Ec;vari;Vta1;WASp;Xrp1
5kbUpTx	Jra_top50	transfac_public__M00174	3.82	0.0911	Jra	**	Jra; kay (inferredBy_Orthology).	mor (inferredBy_MotifSimilarity_n_Orthology).	36	3387	CG10916;CG11426;CG13314;CG2765;CG30154;CG31710;CG4101;CG5835;CG9801;cindr;Fas1;hebe;hid;Hr4;ifc;insc;Jra;Lac;Lapsyn;Mlc-c;moody;pcs;prominin-like;puc;Rab8;RhoGDI;sky;Spn55B;sqh;Swip-1;Tsp42Ec;Tsp42Ef;vari;Vta1;WASp;Xrp1
5kbUpTx	Jra_top50	transfac_public__M00517	3.72	0.0894	Jra	**	Jra; kay (inferredBy_Orthology).	cnc; maf-S; tj (inferredBy_MotifSimilarity_n_Orthology).	30	2044	CG11426;CG13314;CG2765;CG31710;CG4101;CG5835;CG9801;cindr;Fas1;hebe;hid;Hr4;insc;Jra;Lac;Lapsyn;Mlc-c;pcs;prominin-like;puc;Rab8;RhoGDI;sky;Spn55B;sqh;Swip-1;vari;Vta1;WASp;Xrp1
5kbUpTx	Jra_top50	transfac_pro__M03538	3.61	0.0872	Jra	**	Jra; kay (inferredBy_Orthology).		30	2044	CG11426;CG13314;CG2765;CG31710;CG4101;CG5835;CG9801;cindr;Fas1;hebe;hid;Hr4;ifc;insc;Jra;Lac;Lapsyn;Mlc-c;moody;pcs;puc;Rab8;RhoGDI;sky;sqh;Swip-1;vari;Vta1;WASp;Xrp1
5kbUpTx	Jra_top50	swissregulon__hs__NFE2.p2	3.52	0.0856	Jra	*	cnc (inferredBy_Orthology).	Jra; ewg; kay; maf-S; tj (inferredBy_MotifSimilarity_n_Orthology).	29	2248	CG11426;CG1572;CG31710;CG4101;CG5835;CG9801;cindr;Fas1;hebe;hid;Hr4;ifc;insc;Jra;Lac;Lapsyn;Mlc-c;pcs;prominin-like;puc;Rab8;RhoGAP68F;sky;sqh;Swip-1;vari;Vta1;WASp;Xrp1
5kbUpTx	Jra_top50	stark__TGANTCA	3.48	0.0848	Jra	**	Jra; kay (directAnnotation).		33	2281	CG11426;CG13314;CG2765;CG31710;CG4101;CG5835;CG9801;cindr;dia;Fas1;hebe;hid;Hr4;ifc;insc;Jra;Lac;Lapsyn;Mlc-c;moody;pcs;puc;Rab8;RhoGAP68F;RhoGDI;sky;sqh;Swip-1;Tsp42Ec;vari;Vta1;WASp;Xrp1
5kbUpTx	Jra_top50	transfac_pro__M00924	3.36	0.0825	Jra	**	Jra; kay (inferredBy_Orthology).		29	2800	CG10660;CG11426;CG13314;CG2765;CG31710;CG4101;CG5835;cindr;Fas1;hebe;hid;Hr4;ifc;insc;Jra;Lac;Lapsyn;pcs;prominin-like;puc;Rab8;RhoGDI;sky;sqh;Swip-1;Tsp42Ec;Vta1;WASp;Xrp1
5kbUpTx	Jra_top50	cisbp__M3617	3.29	0.0814	Jra	*	cnc (inferredBy_Orthology).	Jra; ewg; kay; maf-S; tj (inferredBy_MotifSimilarity_n_Orthology).	20	1647	CG31710;CG4101;CG5835;cindr;hebe;hid;Hr4;ifc;insc;Jra;Lac;Lapsyn;pcs;prominin-like;puc;sky;sqh;vari;Vta1;WASp
5kbUpTx	Jra_top50	cisbp__M6229	3.22	0.08	Jra	*	kay (inferredBy_Orthology).	Jra; cnc; ewg; maf-S; tj (inferredBy_MotifSimilarity_n_Orthology).	40	4796	AMPdeam;CG10660;CG10916;CG11426;CG13314;CG1572;CG2765;CG31710;CG4101;CG5835;CG9801;cindr;Fas1;hebe;hid;Hr4;ifc;insc;Jra;Klp64D;Lac;Lapsyn;Mlc-c;pcs;prominin-like;puc;Rab8;RhoGDI;sky;Smg6;Spn55B;sqh;Swip-1;Tsp42Ec;Tsp42Ef;vari;Vta1;WASp;Xrp1;ZnT63C
5kbUpTx	Jra_top50	homer__GATGACTCAGCA_NF-E2	3.07	0.0772	Jra	*	cnc (inferredBy_Orthology).	maf-S (inferredBy_MotifSimilarity). Jra; kay; tj (inferredBy_MotifSimilarity_n_Orthology).	29	3667	CG10660;CG11426;CG31710;CG4101;CG5835;CG9801;cindr;dia;Fas1;GATAd;hebe;hid;Hr4;ifc;insc;Jra;Lac;Lapsyn;pcs;prominin-like;puc;sky;Spn55B;sqh;Swip-1;vari;Vta1;WASp;Xrp1
5kbUpTx	Jra_top50	transfac_pro__M00821	3.04	0.0767	Jra	*	cnc; maf-S (inferredBy_Orthology).	Jra; tj (inferredBy_MotifSimilarity_n_Orthology).	34	4963	CG10660;CG11426;CG13314;CG31710;CG4101;CG5835;CG9801;cindr;dia;Fas1;GATAd;hebe;hid;Hr4;ifc;insc;Jra;Klp64D;Lac;Lapsyn;moody;pcs;prominin-like;puc;RhoGAP68F;sky;Smg6;sqh;Swip-1;vari;vsg;Vta1;WASp;Xrp1
5kbUpTx	Jra_top50	transfac_pro__M03870	3.04	0.0766	Jra	*	kay (inferredBy_Orthology).	Jra (inferredBy_MotifSimilarity_n_Orthology).	38	3081	CG10660;CG10916;CG11426;CG13314;CG2765;CG31710;CG4101;CG5835;CG9801;cindr;Fas1;hebe;hid;Hr4;ifc;insc;Jra;Lac;Lapsyn;Mlc-c;moody;pcs;prominin-like;puc;Rab8;RhoGAP68F;RhoGDI;sky;Smg6;Spn55B;sqh;Swip-1;Tsp42Ec;vari;vsg;Vta1;WASp;Xrp1
5kbUpTx	Jra_top50perTarget	cisbp__M2280	8.26	0.0947	Jra	*	kay (inferredBy_Orthology).	Jra (inferredBy_MotifSimilarity). maf-S; mor (inferredBy_MotifSimilarity_n_Orthology).	193	4028	a;Act42A;Act5C;ago;Akt1;ALiX;alpha-Est3;alpha-Est9;AMPdeam;be;Best1;betaTub97EF;Btk29A;CAP;CG10098;CG10103;CG10126;CG10527;CG10874;CG10916;CG11426;CG11658;CG13124;CG13255;CG13314;CG13921;CG1407;CG14073;CG15098;CG15611;CG17544;CG18659;CG1890;CG1943;CG2765;CG2991;CG30069;CG30154;CG30423;CG31038;CG31523;CG31694;CG31710;CG32365;CG34194;CG34417;CG3529;CG4025;CG4101;CG4199;CG42671;CG42709;CG43110;CG500…
5kbUpTx	Jra_top50perTarget	taipale__NFE2_DBD_NATGASTCATN	8.24	0.0946	Jra	*	cnc (inferredBy_Orthology).	Jra; kay (inferredBy_MotifSimilarity_n_Orthology).	162	3214	a;ALiX;alpha-Est3;alpha-Est9;AMPdeam;be;Best1;Btk29A;CAP;CG10098;CG10103;CG10126;CG10527;CG10916;CG11426;CG11658;CG13124;CG13314;CG13921;CG15098;CG16721;CG18659;CG1890;CG1943;CG2765;CG2991;CG31038;CG31523;CG31694;CG31710;CG31955;CG32365;CG34325;CG34382;CG34417;CG4025;CG4101;CG4199;CG42671;CG42709;CG5004;CG5151;CG5835;CG5953;CG6051;CG6191;CG6707;CG7523;CG7546;CG7702;CG9304;CG9328;CG9795;Chd64;CHMP…
5kbUpTx	Jra_top50perTarget	jaspar__MA0478.1	8.15	0.0938	Jra	*	kay (inferredBy_Orthology).	Jra (inferredBy_MotifSimilarity). mor (inferredBy_MotifSimilarity_n_Orthology).	207	4557	a;Act42A;Act5C;ago;Akt1;ALiX;alpha-Est3;alpha-Est9;AMPdeam;be;Best1;betaTub97EF;Btk29A;CAP;CG10098;CG10103;CG10126;CG10527;CG10874;CG10916;CG11426;CG11658;CG13124;CG13255;CG13314;CG13921;CG1407;CG14073;CG14441;CG15098;CG15611;CG17544;CG18659;CG1890;CG1943;CG2765;CG2991;CG30069;CG30154;CG30423;CG31038;CG31523;CG31694;CG31710;CG32365;CG34194;CG34325;CG34417;CG3529;CG4025;CG4101;CG4199;CG42671;CG427…
5kbUpTx	Jra_top50perTarget	cisbp__M5659	7.94	0.092	Jra	*	cnc (inferredBy_Orthology).	Jra; kay (inferredBy_MotifSimilarity_n_Orthology).	195	4853	a;Act42A;ago;ALiX;alpha-Est3;alpha-Est9;AMPdeam;Ank;be;Best1;betaTub97EF;Btk29A;CAP;CG10089;CG10098;CG10103;CG10126;CG10527;CG10874;CG10916;CG11426;CG11658;CG12007;CG13124;CG13314;CG13921;CG14073;CG14441;CG15098;CG16721;CG18659;CG1890;CG1943;CG2765;CG2991;CG30069;CG30423;CG31038;CG31523;CG31694;CG31710;CG31955;CG32365;CG34325;CG34417;CG3529;CG4025;CG4101;CG4199;CG42671;CG42709;CG4462;CG5004;CG515…
5kbUpTx	Jra_top50perTarget	hocomoco__FOS_HUMAN.H10MO.A	7.9	0.0917	Jra	*	kay (inferredBy_Orthology).	Jra (inferredBy_MotifSimilarity). cnc; mor (inferredBy_MotifSimilarity_n_Orthology).	208	4385	a;Act42A;Act5C;ago;Akt1;ALiX;alpha-Est3;alpha-Est9;AMPdeam;be;Best1;betaTub97EF;Btk29A;CAP;CG10098;CG10103;CG10126;CG10527;CG10874;CG10916;CG11426;CG11658;CG13124;CG13255;CG13314;CG13921;CG1407;CG14073;CG14441;CG15098;CG15611;CG17544;CG18659;CG1890;CG1943;CG2765;CG2991;CG30069;CG30154;CG30423;CG31038;CG31523;CG31694;CG31710;CG34194;CG34325;CG34417;CG3529;CG4025;CG4101;CG4199;CG42671;CG42709;CG431…
5kbUpTx	Jra_top50perTarget	hocomoco__JUND_HUMAN.H10MO.A	7.88	0.0915	Jra	**	Jra (inferredBy_Orthology).	kay (inferredBy_MotifSimilarity). cnc (inferredBy_MotifSimilarity_n_Orthology).	207	4605	a;Act42A;Act5C;ago;Akt1;ALiX;alpha-Est3;alpha-Est9;AMPdeam;Best1;betaTub97EF;Btk29A;CAP;CG10089;CG10098;CG10103;CG10126;CG10527;CG10874;CG10916;CG11426;CG11658;CG12007;CG13124;CG13255;CG13314;CG13921;CG1407;CG14073;CG15098;CG15611;CG17544;CG18659;CG1890;CG1943;CG2765;CG2991;CG30069;CG30154;CG30423;CG31038;CG31523;CG31694;CG31710;CG32365;CG34417;CG3529;CG4025;CG4101;CG4199;CG42671;CG42709;CG43110;…
5kbUpTx	Jra_top50perTarget	hocomoco__FOSL1_HUMAN.H10MO.A	7.87	0.0914	Jra	*	kay (inferredBy_Orthology).	Jra (inferredBy_MotifSimilarity).	215	4843	a;Act42A;Act5C;ago;Akt1;ALiX;alpha-Est3;alpha-Est9;AMPdeam;be;Best1;betaTub97EF;Btk29A;CalpA;CAP;CG10098;CG10103;CG10126;CG10527;CG10874;CG10916;CG11426;CG11658;CG13124;CG13255;CG13314;CG13921;CG1407;CG14073;CG14441;CG15098;CG15611;CG1572;CG17544;CG18659;CG1890;CG1943;CG2765;CG2991;CG30069;CG30154;CG30423;CG31038;CG31523;CG31694;CG31710;CG32365;CG34194;CG34325;CG34417;CG3529;CG4025;CG4101;CG4199;…
5kbUpTx	Jra_top50perTarget	cisbp__M4531	7.81	0.091	Jra	**	Jra (inferredBy_Orthology).	kay (inferredBy_MotifSimilarity).	172	3237	a;Act42A;Act5C;ago;Akt1;ALiX;alpha-Est3;alpha-Est9;Best1;betaTub97EF;Btk29A;CAP;CG10098;CG10103;CG10126;CG10527;CG10874;CG11426;CG11658;CG13124;CG13255;CG13314;CG13921;CG1407;CG14073;CG15098;CG18659;CG1890;CG1943;CG2765;CG2991;CG30069;CG30154;CG30423;CG31038;CG31523;CG31694;CG31710;CG32365;CG34417;CG3529;CG4025;CG4101;CG4199;CG42671;CG42709;CG4462;CG5004;CG5151;CG5835;CG5953;CG6051;CG6191;CG6231;…
5kbUpTx	Jra_top50perTarget	cisbp__M2292	7.79	0.0908	Jra	**	Jra (inferredBy_Orthology).	kay (inferredBy_MotifSimilarity). mor (inferredBy_MotifSimilarity_n_Orthology).	209	4670	a;Act42A;Act5C;ago;Akt1;ALiX;alpha-Est3;alpha-Est9;AMPdeam;Best1;betaTub97EF;Btk29A;CAP;CG10098;CG10103;CG10126;CG10527;CG10874;CG10916;CG11426;CG11658;CG12007;CG13124;CG13255;CG13314;CG13921;CG1407;CG14073;CG15098;CG15611;CG17544;CG18659;CG1890;CG1943;CG2765;CG2991;CG30069;CG30154;CG30423;CG31038;CG31523;CG31694;CG31710;CG32365;CG34417;CG3529;CG4025;CG4101;CG4199;CG42671;CG42709;CG43110;CG4462;C…
5kbUpTx	Jra_top50perTarget	jaspar__MA0491.1	7.78	0.0907	Jra	**	Jra (inferredBy_Orthology).	kay (inferredBy_MotifSimilarity). mor (inferredBy_MotifSimilarity_n_Orthology).	204	4038	a;Act42A;Act5C;ago;Akt1;ALiX;alpha-Est3;alpha-Est9;AMPdeam;be;Best1;betaTub97EF;Btk29A;CAP;CG10098;CG10103;CG10126;CG10527;CG10916;CG11426;CG11658;CG12007;CG13124;CG13255;CG13921;CG1407;CG14073;CG15098;CG15611;CG1572;CG16721;CG17544;CG18659;CG1890;CG1943;CG2765;CG2991;CG30069;CG30154;CG30423;CG31038;CG31523;CG31694;CG31710;CG32365;CG34417;CG3529;CG4025;CG4101;CG4199;CG42671;CG42709;CG43110;CG5004…
5kbUpTx	Jra_top50perTarget	scertf__spivak.GCN4	7.74	0.0903	Jra	*		Jra; kay (inferredBy_MotifSimilarity). NFAT; cnc (inferredBy_MotifSimilarity_n_Orthology).	186	3844	a;Act42A;Act5C;ago;Akt1;ALiX;alpha-Est3;alpha-Est9;Best1;betaTub97EF;Btk29A;CAP;CG10098;CG10126;CG10527;CG10874;CG11426;CG11658;CG12007;CG13124;CG13255;CG13314;CG13921;CG14073;CG15098;CG15611;CG17544;CG18659;CG1890;CG1943;CG2765;CG2991;CG30069;CG30423;CG31038;CG31523;CG31694;CG32365;CG34325;CG34417;CG3529;CG4025;CG4101;CG4199;CG42671;CG42709;CG43110;CG5004;CG5151;CG5835;CG5953;CG6051;CG6191;CG623…
5kbUpTx	Jra_top50perTarget	cisbp__M6318	7.7	0.09	Jra	**	Jra (inferredBy_Orthology).	kay (inferredBy_MotifSimilarity). cnc (inferredBy_MotifSimilarity_n_Orthology).	204	4538	a;Act42A;Act5C;ago;Akt1;ALiX;alpha-Est3;alpha-Est9;Best1;betaTub97EF;Btk29A;CAP;CG10089;CG10098;CG10103;CG10126;CG10527;CG10874;CG10916;CG11426;CG11658;CG12007;CG13124;CG13255;CG13314;CG13921;CG1407;CG14073;CG15098;CG15611;CG17544;CG18659;CG1890;CG1943;CG2765;CG2991;CG30069;CG30154;CG30423;CG31038;CG31523;CG31694;CG31710;CG32365;CG34417;CG3529;CG4025;CG4101;CG4199;CG42671;CG42709;CG43110;CG4462;C…
5kbUpTx	Jra_top50perTarget	cisbp__M4684	7.63	0.0894	Jra	*		Jra; kay (inferredBy_MotifSimilarity). cnc (inferredBy_MotifSimilarity_n_Orthology).	178	3554	a;Act42A;ago;ALiX;alpha-Est3;alpha-Est9;Best1;betaTub97EF;Btk29A;CAP;CG10098;CG10103;CG10126;CG10527;CG10874;CG10916;CG11426;CG11658;CG12007;CG13124;CG13314;CG13921;CG1407;CG14073;CG15098;CG18659;CG1890;CG1943;CG2765;CG2991;CG30069;CG30423;CG31038;CG31523;CG31694;CG31710;CG32365;CG34325;CG34417;CG3529;CG4025;CG4101;CG42671;CG4462;CG5004;CG5151;CG5835;CG5953;CG6051;CG6191;CG6707;CG7523;CG7546;CG77…
5kbUpTx	Jra_top50perTarget	cisbp__M0344	7.6	0.0891	Jra	*		Jra; kay (inferredBy_MotifSimilarity_n_Orthology).	191	4312	a;Act42A;Akt1;ALiX;alpha-Est9;Best1;betaTub97EF;Btk29A;CAP;CG10098;CG10103;CG10126;CG10527;CG10874;CG10916;CG11426;CG11658;CG13124;CG13255;CG13314;CG13921;CG14073;CG15098;CG1513;CG17544;CG18659;CG1890;CG1943;CG2765;CG2991;CG30069;CG30423;CG31038;CG31523;CG31694;CG31710;CG32365;CG34417;CG3529;CG4025;CG4101;CG4199;CG42671;CG42709;CG43110;CG4462;CG5004;CG5151;CG5521;CG5835;CG5953;CG6051;CG6191;CG623…
5kbUpTx	Jra_top50perTarget	hocomoco__FOSL2_HUMAN.H10MO.A	7.6	0.0891	Jra	*	kay (inferredBy_Orthology).	Jra; cnc; mor (inferredBy_MotifSimilarity_n_Orthology).	208	4452	a;Act42A;Act5C;ago;Akt1;ALiX;alpha-Est3;alpha-Est9;AMPdeam;be;Best1;betaTub97EF;Btk29A;CalpA;CAP;CG10098;CG10103;CG10126;CG10527;CG10874;CG10916;CG11426;CG11658;CG13124;CG13255;CG13314;CG13921;CG1407;CG14073;CG15098;CG15611;CG1572;CG17544;CG18659;CG1890;CG1943;CG2765;CG2991;CG30069;CG30154;CG30423;CG31038;CG31523;CG31694;CG31710;CG32365;CG34194;CG34417;CG3529;CG4025;CG4101;CG4199;CG42671;CG42709;…
5kbUpTx	Jra_top50perTarget	homer__DATGASTCAT_BATF	7.57	0.0888	Jra	*		Jra; kay (inferredBy_MotifSimilarity). NFAT (inferredBy_MotifSimilarity_n_Orthology).	215	4743	a;Act42A;Act5C;ago;Akt1;ALiX;alpha-Est3;alpha-Est9;AMPdeam;be;Best1;betaTub97EF;Btk29A;CalpA;CAP;CG10089;CG10098;CG10103;CG10126;CG10527;CG10874;CG10916;CG11426;CG11658;CG12007;CG13124;CG13255;CG13314;CG13921;CG1407;CG14073;CG15098;CG15611;CG17544;CG18659;CG1890;CG1943;CG2765;CG2991;CG30069;CG30154;CG30423;CG31038;CG31523;CG31694;CG31710;CG32365;CG34194;CG34325;CG34417;CG3529;CG4025;CG4101;CG4199…
5kbUpTx	Jra_top50perTarget	jaspar__MA0490.1	7.51	0.0884	Jra	**	Jra (inferredBy_Orthology).	kay (inferredBy_MotifSimilarity). mor (inferredBy_MotifSimilarity_n_Orthology).	208	4277	a;Act42A;Act5C;ago;Akt1;ALiX;alpha-Est3;alpha-Est9;AMPdeam;be;Best1;betaTub97EF;Btk29A;CalpA;CAP;CG10089;CG10098;CG10103;CG10126;CG10527;CG10916;CG11426;CG11658;CG13124;CG13255;CG13314;CG13921;CG1407;CG14073;CG14441;CG15098;CG15611;CG17544;CG18659;CG1890;CG1943;CG2765;CG2991;CG30069;CG30154;CG30423;CG31038;CG31523;CG31694;CG31710;CG32365;CG34194;CG34325;CG34417;CG3529;CG4025;CG4101;CG4199;CG42671…
5kbUpTx	Jra_top50perTarget	swissregulon__sacCer__GCN4	7.5	0.0883	Jra	*		Jra; kay (inferredBy_MotifSimilarity). NFAT; cnc (inferredBy_MotifSimilarity_n_Orthology).	185	3931	a;Act42A;Act5C;ago;Akt1;ALiX;alpha-Est3;alpha-Est9;Best1;betaTub97EF;Btk29A;CAP;CG10098;CG10126;CG10527;CG10874;CG11426;CG12007;CG13124;CG13255;CG13314;CG14073;CG15098;CG15611;CG18659;CG1890;CG1943;CG2765;CG2991;CG30069;CG30423;CG31038;CG31523;CG31694;CG32365;CG34417;CG3529;CG4025;CG4101;CG42671;CG42709;CG43110;CG4462;CG5004;CG5151;CG5835;CG5953;CG6051;CG6191;CG6231;CG6707;CG7222;CG7523;CG7546;CG…
5kbUpTx	Jra_top50perTarget	cisbp__M6038	7.48	0.0882	Jra	*		kay (inferredBy_MotifSimilarity). Jra; cnc (inferredBy_MotifSimilarity_n_Orthology).	191	4390	a;Act42A;ago;Akt1;ALiX;alpha-Est3;alpha-Est9;AMPdeam;be;Best1;betaTub97EF;Btk29A;CAP;CG10089;CG10098;CG10103;CG10126;CG10527;CG10874;CG10916;CG11426;CG12007;CG13124;CG13314;CG13921;CG14073;CG18659;CG1890;CG1943;CG2765;CG2991;CG30069;CG30423;CG31038;CG31523;CG31694;CG32365;CG34325;CG34417;CG3529;CG4025;CG4101;CG4199;CG42671;CG42709;CG43110;CG4462;CG5004;CG5151;CG5835;CG5953;CG6051;CG6191;CG6218;CG…
5kbUpTx	Jra_top50perTarget	taipale__JDP2_full_ATGASTCAT	7.48	0.0881	Jra	*		kay (inferredBy_MotifSimilarity). Jra; cnc (inferredBy_MotifSimilarity_n_Orthology).	167	3185	a;ago;ALiX;alpha-Est9;Best1;betaTub97EF;Btk29A;CAP;CG10098;CG10103;CG10126;CG10527;CG11426;CG11658;CG12007;CG13124;CG13314;CG13921;CG14073;CG15098;CG18659;CG1890;CG1943;CG2765;CG2991;CG30069;CG30423;CG31038;CG31523;CG31694;CG32365;CG34417;CG3529;CG4025;CG4101;CG42671;CG42709;CG4462;CG5004;CG5151;CG5835;CG5953;CG6051;CG6191;CG6231;CG6707;CG7222;CG7523;CG7546;CG7702;CG9328;Chd64;Chmp1;CHMP2B;cib;ci…
5kbUpTx	Jra_top50perTarget	cisbp__M5589	7.47	0.088	Jra	*		kay (inferredBy_MotifSimilarity). Jra; cnc (inferredBy_MotifSimilarity_n_Orthology).	181	4071	a;ago;ALiX;alpha-Est9;Best1;betaTub97EF;Btk29A;CAP;CG10098;CG10103;CG10126;CG10527;CG10874;CG11426;CG11658;CG12007;CG13124;CG13314;CG13921;CG14073;CG15098;CG18659;CG1890;CG1943;CG2765;CG2991;CG30069;CG30423;CG31038;CG31523;CG31694;CG32365;CG34325;CG34417;CG3529;CG4025;CG4101;CG42671;CG42709;CG43110;CG4462;CG5004;CG5151;CG5835;CG5953;CG6051;CG6191;CG6231;CG6707;CG7222;CG7523;CG7546;CG7702;CG9328;C…
5kbUpTx	Jra_top50perTarget	yetfasco__YER064C_2094	7.46	0.088	Jra	*		Jra; kay (inferredBy_MotifSimilarity). cnc (inferredBy_MotifSimilarity_n_Orthology).	193	4353	a;Act42A;Act5C;ago;Akt1;ALiX;alpha-Est3;alpha-Est9;AMPdeam;Arc1;Best1;betaTub97EF;Btk29A;CAP;CG10089;CG10098;CG10103;CG10126;CG10527;CG10874;CG10916;CG11426;CG13124;CG13255;CG13314;CG13921;CG14073;CG15098;CG18659;CG1890;CG1943;CG2765;CG2991;CG30069;CG30154;CG30423;CG31038;CG31523;CG31694;CG31710;CG32365;CG34325;CG34417;CG3529;CG4025;CG4101;CG4199;CG42671;CG42709;CG43110;CG4462;CG5004;CG5151;CG552…
5kbUpTx	Jra_top50perTarget	cisbp__M2278	7.45	0.0879	Jra	*	kay (inferredBy_Orthology).	Jra (inferredBy_MotifSimilarity_n_Orthology).	180	3292	a;Act42A;Act5C;ago;Akt1;ALiX;alpha-Est3;alpha-Est9;Best1;betaTub97EF;Btk29A;CAP;CG10098;CG10103;CG10126;CG10527;CG10916;CG11426;CG11658;CG13124;CG13255;CG13314;CG13921;CG1407;CG14073;CG15098;CG17544;CG18659;CG1890;CG1943;CG2765;CG2991;CG30069;CG30423;CG31038;CG31523;CG31694;CG31710;CG34417;CG3529;CG4025;CG4101;CG4199;CG42671;CG42709;CG43110;CG5004;CG5151;CG5521;CG5835;CG5953;CG6051;CG6191;CG6231;…
5kbUpTx	Jra_top50perTarget	cisbp__M2291	7.43	0.0877	Jra	**	Jra (inferredBy_Orthology).	kay (inferredBy_MotifSimilarity). mor (inferredBy_MotifSimilarity_n_Orthology).	212	4652	a;Act42A;Act5C;ago;Akt1;ALiX;alpha-Est3;alpha-Est9;AMPdeam;be;Best1;betaTub97EF;Btk29A;CalpA;CAP;CG10089;CG10098;CG10103;CG10126;CG10527;CG10874;CG10916;CG11426;CG11658;CG13124;CG13255;CG13314;CG13921;CG1407;CG14073;CG14441;CG15098;CG15611;CG17544;CG18659;CG1890;CG1943;CG2765;CG2991;CG30069;CG30154;CG30423;CG31038;CG31523;CG31694;CG31710;CG32365;CG34194;CG34417;CG3529;CG4025;CG4101;CG4199;CG42671…
5kbUpTx	Jra_top50perTarget	taipale__Jdp2_DBD_ATGASTCAT_repr	7.43	0.0877	Jra	*		kay (inferredBy_MotifSimilarity). Jra; cnc (inferredBy_MotifSimilarity_n_Orthology).	207	4956	a;Act42A;Act5C;ago;Akt1;ALiX;alpha-Est3;alpha-Est9;AMPdeam;Ank;be;Best1;betaTub97EF;Btk29A;CAP;CG10089;CG10098;CG10103;CG10126;CG10527;CG10874;CG10916;CG11426;CG11658;CG12007;CG13124;CG13255;CG13314;CG13921;CG14073;CG15098;CG15611;CG1572;CG18659;CG1890;CG1943;CG2765;CG2991;CG30069;CG30423;CG31038;CG31523;CG31694;CG31955;CG32365;CG34194;CG34325;CG34417;CG3529;CG4025;CG4101;CG4199;CG42671;CG42709;C…
5kbUpTx	Jra_top50perTarget	cisbp__M4570	7.43	0.0877	Jra	**	Jra (inferredBy_Orthology).	cnc; kay; mor (inferredBy_MotifSimilarity_n_Orthology).	210	4778	a;Act42A;Act5C;ago;Akt1;ALiX;alpha-Est3;alpha-Est9;AMPdeam;be;Best1;betaTub97EF;Btk29A;CalpA;CAP;CG10098;CG10103;CG10126;CG10527;CG10874;CG10916;CG11426;CG11658;CG12007;CG13124;CG13255;CG13314;CG13921;CG1407;CG14073;CG15098;CG1572;CG17544;CG18659;CG1890;CG1943;CG2765;CG2991;CG30069;CG30154;CG30423;CG31038;CG31523;CG31694;CG31710;CG31997;CG32365;CG34325;CG34417;CG3529;CG4025;CG4101;CG4199;CG42671;…
5kbUpTx	Jra_top50perTarget	transfac_pro__M04693	7.42	0.0876	Jra	*	kay (inferredBy_Orthology).	Jra (inferredBy_MotifSimilarity). NFAT; cnc (inferredBy_MotifSimilarity_n_Orthology).	191	4110	a;Act42A;ago;ALiX;alpha-Est3;alpha-Est9;Best1;betaTub97EF;Btk29A;CalpA;CAP;CG10098;CG10103;CG10126;CG10527;CG10874;CG10916;CG11426;CG11658;CG12007;CG13124;CG13255;CG13314;CG13921;CG1407;CG14073;CG15098;CG15611;CG18659;CG1890;CG1943;CG2765;CG2991;CG30069;CG30423;CG31038;CG31523;CG31694;CG31710;CG32365;CG34325;CG34417;CG3529;CG4025;CG4101;CG42671;CG4462;CG5004;CG5151;CG5521;CG5835;CG5953;CG6051;CG6…
5kbUpTx	Jra_top50perTarget	cisbp__M5587	7.41	0.0875	Jra	*		Jra; kay (inferredBy_MotifSimilarity). cnc (inferredBy_MotifSimilarity_n_Orthology).	175	3844	a;Act42A;ago;ALiX;alpha-Est9;Best1;betaTub97EF;Btk29A;CAP;CG10098;CG10103;CG10126;CG10527;CG10874;CG11426;CG11658;CG12007;CG13124;CG13314;CG13921;CG14073;CG15098;CG18659;CG1890;CG1943;CG2765;CG2991;CG30069;CG30423;CG31038;CG31523;CG31694;CG32365;CG34417;CG3529;CG4025;CG4101;CG4199;CG42671;CG42709;CG43110;CG4462;CG5004;CG5151;CG5835;CG5953;CG6051;CG6191;CG6231;CG6707;CG7222;CG7523;CG7546;CG7702;CG…
5kbUpTx	Jra_top50perTarget	hocomoco__FOSB_HUMAN.H10MO.C	7.39	0.0874	Jra	*	kay (inferredBy_Orthology).	Jra (inferredBy_MotifSimilarity). cnc; mor (inferredBy_MotifSimilarity_n_Orthology).	218	4832	a;Act42A;Act5C;ago;Akt1;ALiX;alpha-Est3;alpha-Est9;AMPdeam;be;Best1;betaTub97EF;Btk29A;CalpA;CAP;CG10089;CG10098;CG10103;CG10126;CG10527;CG10874;CG10916;CG11426;CG11658;CG13124;CG13255;CG13314;CG13921;CG1407;CG14073;CG14441;CG15098;CG15611;CG1572;CG16721;CG17544;CG18659;CG1890;CG1943;CG2765;CG2991;CG30069;CG30154;CG30423;CG31038;CG31523;CG31694;CG31710;CG32365;CG34325;CG34417;CG3529;CG4025;CG4101…
5kbUpTx	Jra_top50perTarget	taipale__JDP2_DBD_ATGASTCAT	7.36	0.0871	Jra	*		Jra; kay (inferredBy_MotifSimilarity). cnc (inferredBy_MotifSimilarity_n_Orthology).	194	4664	a;Act42A;ago;Akt1;ALiX;alpha-Est3;alpha-Est9;AMPdeam;be;Best1;betaTub97EF;Btk29A;CAP;CG10098;CG10103;CG10126;CG10527;CG10874;CG10916;CG11426;CG11658;CG12007;CG13124;CG13255;CG13314;CG13921;CG14073;CG15098;CG18659;CG1890;CG1943;CG2765;CG2991;CG30069;CG30423;CG31038;CG31523;CG31694;CG32365;CG34194;CG34417;CG3529;CG4025;CG4101;CG4199;CG42671;CG42709;CG43110;CG4462;CG5004;CG5151;CG5835;CG5953;CG6051;…
5kbUpTx	Jra_top50perTarget	jaspar__MA0476.1	7.34	0.087	Jra	*	kay (inferredBy_Orthology).	Jra (inferredBy_MotifSimilarity_n_Orthology).	209	4369	a;Act42A;Act5C;ago;Akt1;ALiX;alpha-Est3;alpha-Est9;AMPdeam;be;Best1;betaTub97EF;Btk29A;CAP;CG10098;CG10103;CG10126;CG10527;CG10916;CG11426;CG11658;CG13124;CG13255;CG13314;CG13921;CG1407;CG14073;CG15098;CG15611;CG1572;CG17544;CG18659;CG1890;CG1943;CG2765;CG2991;CG30069;CG30154;CG30423;CG31038;CG31523;CG31694;CG31710;CG34194;CG34325;CG34417;CG3529;CG4025;CG4101;CG4199;CG42671;CG42709;CG43110;CG5004…
5kbUpTx	Jra_top50perTarget	transfac_pro__M02876	7.33	0.0869	Jra	*		Jra; kay (inferredBy_MotifSimilarity).	140	2325	a;Act42A;Act5C;ago;ALiX;alpha-Est9;Best1;betaTub97EF;Btk29A;CAP;CG10098;CG10103;CG10126;CG10527;CG10874;CG11426;CG13124;CG13255;CG13314;CG14073;CG15098;CG18659;CG1890;CG1943;CG2765;CG2991;CG30069;CG31038;CG31523;CG34417;CG3529;CG4025;CG4101;CG4199;CG42671;CG4462;CG5004;CG5151;CG5835;CG5953;CG6051;CG6191;CG6707;CG7523;CG7546;CG7702;CG9328;CG9801;Chd64;CHMP2B;cib;cindr;cpo;Diap1;dock;E(spl)mbeta-HL…
5kbUpTx	Jra_top50perTarget	cisbp__M4608	7.28	0.0864	Jra	**	Jra (inferredBy_Orthology).	kay (inferredBy_MotifSimilarity). cnc (inferredBy_MotifSimilarity_n_Orthology).	191	3772	a;Act42A;Act5C;ago;Akt1;ALiX;alpha-Est3;alpha-Est9;Best1;betaTub97EF;Btk29A;CAP;CG10098;CG10103;CG10126;CG10527;CG10874;CG10916;CG11426;CG11658;CG13124;CG13255;CG13314;CG13921;CG1407;CG14073;CG15098;CG15611;CG17544;CG18659;CG1890;CG1943;CG2765;CG2991;CG30069;CG30154;CG30423;CG31038;CG31523;CG31694;CG31710;CG32365;CG34417;CG3529;CG4025;CG4101;CG4199;CG42671;CG42709;CG43110;CG4462;CG5004;CG5151;CG5…
5kbUpTx	Jra_top50perTarget	hocomoco__JUNB_HUMAN.H10MO.C	7.27	0.0863	Jra	**	Jra (inferredBy_Orthology).	cnc; kay; mor (inferredBy_MotifSimilarity_n_Orthology).	189	4054	a;Act42A;Act5C;ago;Akt1;ALiX;alpha-Est3;alpha-Est9;Best1;betaTub97EF;Btk29A;CAP;CG10098;CG10126;CG10527;CG10916;CG11426;CG11658;CG13124;CG13255;CG13314;CG13921;CG1407;CG14073;CG15098;CG15611;CG1572;CG17544;CG18659;CG1890;CG1943;CG2765;CG2991;CG30069;CG30154;CG30423;CG31038;CG31523;CG31694;CG31710;CG34194;CG34417;CG3529;CG4025;CG4101;CG4199;CG42671;CG42709;CG43110;CG4462;CG5004;CG5151;CG5835;CG595…
5kbUpTx	Jra_top50perTarget	homer__DATGASTCATHN_Atf3	7.23	0.086	Jra	*		Jra; kay (inferredBy_MotifSimilarity).	204	4200	a;Act42A;Act5C;ago;Akt1;ALiX;alpha-Est3;alpha-Est9;AMPdeam;be;Best1;betaTub97EF;Btk29A;CAP;CG10098;CG10103;CG10126;CG10527;CG10874;CG10916;CG11426;CG11658;CG13124;CG13255;CG13314;CG13921;CG1407;CG14073;CG15098;CG15611;CG17544;CG18659;CG1890;CG1943;CG2765;CG2991;CG30069;CG30154;CG30423;CG31038;CG31523;CG31694;CG31710;CG32365;CG34417;CG3529;CG4025;CG4101;CG4199;CG42671;CG42709;CG43110;CG5004;CG5151…
5kbUpTx	Jra_top50perTarget	cisbp__M4590	7.18	0.0856	Jra	*	kay (inferredBy_Orthology).	Jra; mor (inferredBy_MotifSimilarity_n_Orthology).	215	4801	a;Act42A;Act5C;ago;Akt1;ALiX;alpha-Est3;alpha-Est9;AMPdeam;be;Best1;betaTub97EF;Btk29A;CAP;CG10089;CG10098;CG10103;CG10126;CG10527;CG10874;CG10916;CG11426;CG11658;CG13124;CG13255;CG13314;CG13921;CG1407;CG14073;CG14441;CG15098;CG15611;CG1572;CG16721;CG17544;CG18659;CG1890;CG1943;CG2765;CG2991;CG30069;CG30154;CG30423;CG31038;CG31523;CG31694;CG31710;CG32365;CG34325;CG34417;CG3529;CG4025;CG4101;CG419…
5kbUpTx	Jra_top50perTarget	cisbp__M4565	7.16	0.0854	Jra	*	kay (inferredBy_Orthology).	Jra (inferredBy_MotifSimilarity).	168	3217	a;Act42A;Act5C;ago;Akt1;ALiX;alpha-Est3;alpha-Est9;Best1;betaTub97EF;Btk29A;CAP;CG10098;CG10103;CG10126;CG10527;CG10874;CG10916;CG11426;CG13124;CG13255;CG13314;CG13921;CG1407;CG15098;CG18659;CG1890;CG1943;CG2765;CG2991;CG30069;CG30423;CG31038;CG31523;CG31694;CG31710;CG32365;CG34417;CG3529;CG4025;CG4101;CG4199;CG42671;CG42709;CG5004;CG5151;CG5521;CG5835;CG5953;CG6051;CG6191;CG6707;CG7523;CG7546;CG…
5kbUpTx	Jra_top50perTarget	cisbp__M4591	7.03	0.0843	Jra	**	Jra (inferredBy_Orthology).	kay (inferredBy_MotifSimilarity). NFAT; mor (inferredBy_MotifSimilarity_n_Orthology).	189	3850	a;Act42A;Act5C;ago;Akt1;ALiX;alpha-Est3;alpha-Est9;Best1;betaTub97EF;Btk29A;CAP;CG10098;CG10103;CG10126;CG10527;CG10874;CG10916;CG11426;CG13124;CG13314;CG13921;CG1407;CG14073;CG15098;CG17544;CG18659;CG1890;CG1943;CG2765;CG2991;CG30069;CG30154;CG30423;CG31038;CG31523;CG31694;CG31710;CG34325;CG34417;CG3529;CG4025;CG4101;CG4199;CG42671;CG42709;CG43110;CG4462;CG5004;CG5151;CG5835;CG5953;CG6051;CG6191…
5kbUpTx	Jra_top50perTarget	cisbp__M2290	7.02	0.0842	Jra	**	Jra (inferredBy_Orthology).	kay (inferredBy_MotifSimilarity). NFAT; mor (inferredBy_MotifSimilarity_n_Orthology).	196	4212	a;Act42A;Act5C;ago;Akt1;ALiX;alpha-Est3;alpha-Est9;Best1;betaTub97EF;Btk29A;CAP;CG10098;CG10103;CG10126;CG10527;CG10874;CG10916;CG11426;CG13124;CG13255;CG13314;CG13921;CG1407;CG14073;CG15098;CG15611;CG17544;CG18659;CG1890;CG1943;CG2765;CG2991;CG30069;CG30154;CG30423;CG31038;CG31523;CG31694;CG31710;CG34417;CG3529;CG4025;CG4101;CG4199;CG42671;CG42709;CG43110;CG5004;CG5151;CG5521;CG5835;CG5953;CG605…
5kbUpTx	Jra_top50perTarget	cisbp__M4541	7.01	0.0841	Jra	**	Jra (inferredBy_Orthology).	kay (inferredBy_MotifSimilarity).	200	4711	a;Act42A;Act5C;ago;ALiX;alpha-Est3;alpha-Est9;AMPdeam;be;Best1;betaTub97EF;Btk29A;CAP;CG10089;CG10098;CG10103;CG10126;CG10527;CG10874;CG10916;CG11426;CG11658;CG12007;CG13124;CG13255;CG13314;CG13921;CG1407;CG14073;CG15098;CG18659;CG1890;CG1943;CG2765;CG2991;CG30069;CG30423;CG31038;CG31523;CG31694;CG31710;CG31997;CG32365;CG34325;CG34417;CG3529;CG4025;CG4101;CG4199;CG42671;CG42709;CG43110;CG4462;CG5…
5kbUpTx	Jra_top50perTarget	homer__GATGACTCATCN_Jun-AP1	6.97	0.0838	Jra	**	Jra (inferredBy_Orthology).	kay (inferredBy_MotifSimilarity). cnc; mor (inferredBy_MotifSimilarity_n_Orthology).	206	4450	a;Act42A;Act5C;ago;Akt1;ALiX;alpha-Est3;alpha-Est9;AMPdeam;be;Best1;betaTub97EF;Btk29A;CAP;CG10089;CG10098;CG10103;CG10126;CG10527;CG10874;CG10916;CG11426;CG11658;CG13124;CG13255;CG13314;CG13921;CG1407;CG14073;CG15098;CG15611;CG1572;CG16721;CG17544;CG18659;CG1890;CG1943;CG2765;CG2991;CG30069;CG30154;CG30423;CG31038;CG31523;CG31694;CG31710;CG32365;CG34325;CG34417;CG3529;CG4025;CG4101;CG4199;CG4267…
5kbUpTx	Jra_top50perTarget	transfac_pro__M07685	6.96	0.0837	Jra	*	kay (directAnnotation).	Jra (inferredBy_MotifSimilarity).	167	3272	a;ago;ALiX;Best1;betaTub97EF;Btk29A;CAP;CG10098;CG10103;CG10126;CG10527;CG10916;CG11426;CG11658;CG13124;CG13314;CG13921;CG1407;CG14073;CG15098;CG17544;CG18659;CG1890;CG1943;CG2765;CG2991;CG30069;CG30423;CG31038;CG31523;CG32365;CG34325;CG34417;CG3529;CG4025;CG4101;CG4199;CG42671;CG42709;CG5004;CG5151;CG5521;CG5835;CG5953;CG6051;CG6191;CG6231;CG6707;CG7222;CG7523;CG7702;CG9328;CG9801;Chd64;Chmp1;CH…
5kbUpTx	Jra_top50perTarget	cisbp__M4619	6.96	0.0837	Jra	*	kay (inferredBy_Orthology).	Jra (inferredBy_MotifSimilarity). mor (inferredBy_MotifSimilarity_n_Orthology).	184	3473	a;Act42A;Act5C;ago;Akt1;ALiX;alpha-Est3;alpha-Est9;Best1;betaTub97EF;Btk29A;CAP;CG10098;CG10103;CG10126;CG10527;CG10874;CG10916;CG11426;CG13124;CG13255;CG13314;CG13921;CG1407;CG14073;CG14441;CG15098;CG15611;CG17544;CG18659;CG1890;CG1943;CG2765;CG2991;CG30069;CG30154;CG30423;CG31038;CG31523;CG31694;CG31710;CG32365;CG34417;CG3529;CG4025;CG4101;CG4199;CG42671;CG42709;CG43110;CG5004;CG5151;CG5521;CG5…
5kbUpTx	Jra_top50perTarget	homer__NNATGASTCATH_Fra1	6.93	0.0835	Jra	*		Jra; kay (inferredBy_MotifSimilarity). cnc; mor (inferredBy_MotifSimilarity_n_Orthology).	187	3553	a;Act42A;Act5C;ago;Akt1;ALiX;alpha-Est9;Best1;betaTub97EF;Btk29A;CAP;CG10098;CG10103;CG10126;CG10527;CG10874;CG10916;CG11426;CG11658;CG13124;CG13255;CG13314;CG13921;CG14073;CG15098;CG17544;CG18659;CG1890;CG1943;CG2765;CG2991;CG30069;CG30423;CG31038;CG31523;CG31694;CG31710;CG34325;CG34417;CG3529;CG4025;CG4101;CG4199;CG42671;CG42709;CG43110;CG5004;CG5151;CG5521;CG5835;CG5953;CG6051;CG6191;CG6231;CG…
5kbUpTx	Jra_top50perTarget	factorbook__AP1	6.91	0.0832	Jra	**	Jra; kay (inferredBy_Orthology).	mor (inferredBy_MotifSimilarity_n_Orthology).	188	3625	a;Act42A;Act5C;ago;Akt1;ALiX;alpha-Est3;alpha-Est9;be;Best1;betaTub97EF;Btk29A;CAP;CG10098;CG10103;CG10126;CG10527;CG10916;CG11426;CG13124;CG13255;CG13314;CG13921;CG1407;CG15098;CG15611;CG1572;CG17544;CG18659;CG1890;CG1943;CG2765;CG2991;CG30069;CG30154;CG30423;CG31038;CG31523;CG31694;CG31710;CG34417;CG3529;CG4025;CG4101;CG4199;CG42671;CG42709;CG43110;CG5004;CG5151;CG5521;CG5835;CG5953;CG6051;CG61…
5kbUpTx	Jra_top50perTarget	cisbp__M4530	6.88	0.0831	Jra	*	kay (inferredBy_Orthology).	Jra (inferredBy_MotifSimilarity_n_Orthology).	205	4175	a;Act42A;Act5C;ago;Akt1;ALiX;alpha-Est3;alpha-Est9;AMPdeam;Best1;betaTub97EF;Btk29A;CAP;CG10098;CG10103;CG10126;CG10527;CG10874;CG10916;CG11426;CG11658;CG13124;CG13255;CG13314;CG13921;CG1407;CG14073;CG15098;CG15611;CG1572;CG17544;CG18659;CG1890;CG1943;CG2765;CG2991;CG30069;CG30154;CG30423;CG31038;CG31523;CG31694;CG31710;CG32365;CG34194;CG34417;CG3529;CG4025;CG4101;CG4199;CG42671;CG42709;CG43110;C…
5kbUpTx	Jra_top50perTarget	yetfasco__YIL056W_2091	6.86	0.0829	Jra	*		Jra; kay (inferredBy_MotifSimilarity). cnc; mor (inferredBy_MotifSimilarity_n_Orthology).	156	3012	a;Act42A;Act5C;ago;Akt1;ALiX;alpha-Est3;alpha-Est9;Best1;betaTub97EF;Btk29A;CAP;CG10089;CG10098;CG10126;CG10527;CG10916;CG11426;CG13124;CG13255;CG13314;CG14073;CG15098;CG15611;CG18659;CG1890;CG1943;CG2765;CG2991;CG30069;CG30423;CG31038;CG31523;CG31694;CG31710;CG32365;CG34417;CG3529;CG4025;CG4101;CG4199;CG42671;CG42709;CG5004;CG5151;CG5835;CG5953;CG6051;CG6191;CG6231;CG6707;CG7130;CG7546;CG7702;CG…
5kbUpTx	Jra_top50perTarget	cisbp__M6230	6.85	0.0828	Jra	*	kay (inferredBy_Orthology).	Jra; cnc; mor (inferredBy_MotifSimilarity_n_Orthology).	196	4415	a;Act42A;Act5C;ago;Akt1;ALiX;alpha-Est3;alpha-Est9;AMPdeam;be;Best1;betaTub97EF;Btk29A;CAP;CG10089;CG10098;CG10103;CG10126;CG10527;CG10874;CG10916;CG11426;CG11658;CG12007;CG13124;CG13255;CG13314;CG13921;CG1407;CG14073;CG15098;CG15611;CG1572;CG17544;CG18659;CG1890;CG1943;CG2765;CG2991;CG30069;CG30423;CG31038;CG31523;CG31694;CG31710;CG32365;CG34417;CG3529;CG4025;CG4101;CG4199;CG42671;CG42709;CG4311…
5kbUpTx	Jra_top50perTarget	hocomoco__FOSL1_MOUSE.H10MO.C	6.83	0.0826	Jra	*	kay (inferredBy_Orthology).	Jra (inferredBy_MotifSimilarity). mor (inferredBy_MotifSimilarity_n_Orthology).	216	4711	a;Act42A;Act5C;ago;Akt1;ALiX;alpha-Est3;alpha-Est9;be;Best1;betaTub97EF;Btk29A;CalpA;CAP;CG10098;CG10103;CG10126;CG10527;CG10874;CG10916;CG11426;CG11658;CG13124;CG13255;CG13314;CG13921;CG1407;CG14073;CG14441;CG15098;CG15611;CG1572;CG16721;CG17544;CG18659;CG1890;CG1943;CG2765;CG2991;CG30069;CG30154;CG30423;CG31038;CG31523;CG31694;CG31710;CG32365;CG34382;CG34417;CG3529;CG4025;CG4101;CG4199;CG42671;…
5kbUpTx	Jra_top50perTarget	cisbp__M2979	6.78	0.0822	Jra	*	cnc (inferredBy_Orthology).	Jra (inferredBy_MotifSimilarity_n_Orthology).	168	3489	a;Act42A;ago;ALiX;alpha-Est3;alpha-Est9;AMPdeam;Best1;betaTub97EF;Btk29A;CAP;CG10098;CG10126;CG10527;CG10874;CG10916;CG11426;CG12007;CG13124;CG13314;CG14073;CG15098;CG15611;CG18659;CG1890;CG1943;CG2765;CG2991;CG30069;CG30423;CG31038;CG31523;CG31694;CG31710;CG32365;CG34325;CG34417;CG3529;CG4025;CG4101;CG4199;CG42671;CG42709;CG43110;CG5004;CG5151;CG5835;CG5953;CG6051;CG6191;CG6218;CG6231;CG6707;CG7…
5kbUpTx	Jra_top50perTarget	jaspar__MA0489.1	6.75	0.0819	Jra	**	Jra (inferredBy_Orthology).	kay (inferredBy_MotifSimilarity). NFAT; mor (inferredBy_MotifSimilarity_n_Orthology).	216	4839	a;Act42A;Act5C;ago;Akt1;ALiX;alpha-Est3;alpha-Est9;AMPdeam;be;Best1;betaTub97EF;Btk29A;CAP;CG10098;CG10103;CG10126;CG10527;CG10916;CG11426;CG11658;CG13124;CG13255;CG13314;CG13921;CG1407;CG14073;CG15098;CG15611;CG17544;CG18659;CG1890;CG1943;CG2765;CG2991;CG30069;CG30154;CG30423;CG31038;CG31523;CG31694;CG31710;CG31997;CG32365;CG34417;CG3529;CG4025;CG4101;CG4199;CG42671;CG42709;CG43110;CG4462;CG5004…
5kbUpTx	Jra_top50perTarget	transfac_public__M00490	6.68	0.0813	Jra	*	cnc (inferredBy_Orthology).	Jra; kay (inferredBy_MotifSimilarity_n_Orthology).	166	3581	a;Act42A;Act5C;Akt1;ALiX;alpha-Est9;Best1;betaTub97EF;Btk29A;CAP;CG10098;CG10126;CG10527;CG10874;CG10916;CG11426;CG13124;CG13314;CG13921;CG15098;CG1513;CG18659;CG1890;CG1943;CG2765;CG2991;CG30069;CG31038;CG31523;CG31694;CG31710;CG32365;CG34417;CG3529;CG4025;CG4101;CG42671;CG42709;CG5004;CG5151;CG5835;CG5953;CG6051;CG6191;CG6231;CG6707;CG7222;CG7546;CG7702;CG8671;CG9304;CG9328;CG9795;CG9801;Chd64;…
5kbUpTx	Jra_top50perTarget	hocomoco__FOSL2_MOUSE.H10MO.A	6.67	0.0812	Jra	*	kay (inferredBy_Orthology).	Jra; cnc; mor (inferredBy_MotifSimilarity_n_Orthology).	199	4461	a;Act42A;Act5C;ago;Akt1;ALiX;alpha-Est3;alpha-Est9;AMPdeam;be;Best1;betaTub97EF;Btk29A;CAP;CG10089;CG10098;CG10103;CG10126;CG10527;CG10874;CG10916;CG11426;CG11658;CG12007;CG13124;CG13255;CG13314;CG13921;CG1407;CG14073;CG15098;CG15611;CG1572;CG17544;CG18659;CG1890;CG1943;CG2765;CG2991;CG30069;CG30423;CG31038;CG31523;CG31694;CG31710;CG32365;CG34417;CG3529;CG4025;CG4101;CG4199;CG42671;CG42709;CG4311…
5kbUpTx	Jra_top50perTarget	flyfactorsurvey__kay_Jra_SANGER_5_FBgn0001291	6.66	0.0812	Jra	**	Jra (directAnnotation).	kay (inferredBy_MotifSimilarity).	169	3069	a;Act42A;Act5C;ago;Akt1;ALiX;alpha-Est9;Best1;betaTub97EF;Btk29A;CAP;CG10098;CG10103;CG10126;CG10527;CG11426;CG13124;CG13255;CG13314;CG13921;CG14073;CG15098;CG18659;CG1890;CG1943;CG2765;CG2991;CG30069;CG30154;CG30423;CG31038;CG31523;CG31694;CG31710;CG32365;CG34417;CG3529;CG4025;CG4101;CG4199;CG42671;CG42709;CG5004;CG5151;CG5835;CG5953;CG6051;CG6191;CG6231;CG6707;CG7523;CG7546;CG7702;CG9328;CG9795…
5kbUpTx	Jra_top50perTarget	cisbp__M2980	6.65	0.0811	Jra	*	cnc (inferredBy_Orthology).	Jra; kay (inferredBy_MotifSimilarity_n_Orthology).	167	3599	a;Act42A;Act5C;Akt1;ALiX;alpha-Est9;Best1;betaTub97EF;Btk29A;CAP;CG10098;CG10126;CG10527;CG10874;CG10916;CG11426;CG13124;CG13314;CG13921;CG14073;CG15098;CG1513;CG18659;CG1890;CG1943;CG2765;CG2991;CG30069;CG31038;CG31523;CG31694;CG31710;CG32365;CG34417;CG3529;CG4025;CG4101;CG4199;CG42671;CG42709;CG5004;CG5151;CG5835;CG5953;CG6051;CG6191;CG6231;CG6707;CG7222;CG7546;CG7702;CG8671;CG9304;CG9328;CG979…
5kbUpTx	Jra_top50perTarget	homer__ATGACTCATC_AP-1	6.65	0.0811	Jra	**	Jra (inferredBy_Orthology).	kay (inferredBy_MotifSimilarity). cnc; maf-S; mor (inferredBy_MotifSimilarity_n_Orthology).	211	4538	a;Act42A;Act5C;ago;Akt1;ALiX;alpha-Est3;alpha-Est9;AMPdeam;be;Best1;betaTub97EF;Btk29A;CAP;CG10098;CG10103;CG10126;CG10527;CG10874;CG10916;CG11426;CG11658;CG13124;CG13255;CG13314;CG13921;CG1407;CG14073;CG15098;CG15611;CG1572;CG16721;CG17544;CG18659;CG1890;CG1943;CG2765;CG2991;CG30069;CG30154;CG30423;CG31038;CG31523;CG31694;CG31710;CG32365;CG34325;CG34417;CG3529;CG4025;CG4101;CG4199;CG42671;CG4270…
5kbUpTx	Jra_top50perTarget	hocomoco__JUN_HUMAN.H10MO.A	6.52	0.08	Jra	**	Jra (inferredBy_Orthology).	kay (inferredBy_MotifSimilarity). cnc; mor (inferredBy_MotifSimilarity_n_Orthology).	184	3546	a;Act42A;Act5C;Akt1;ALiX;alpha-Est3;alpha-Est9;Best1;betaTub97EF;Btk29A;CalpA;CAP;CG10089;CG10098;CG10103;CG10126;CG10527;CG10874;CG10916;CG11426;CG11658;CG12007;CG13124;CG13255;CG13314;CG13921;CG1407;CG14073;CG15098;CG15611;CG17544;CG18659;CG1890;CG1943;CG2765;CG2991;CG30069;CG30423;CG31038;CG31523;CG31694;CG31710;CG34417;CG3529;CG4025;CG4101;CG4199;CG42671;CG42709;CG43110;CG5004;CG5151;CG5521;C…
5kbUpTx	Jra_top50perTarget	cisbp__M5050	6.49	0.0797	Jra	**	Jra (directAnnotation).	kay (inferredBy_MotifSimilarity).	169	3069	a;Act42A;Act5C;ago;Akt1;ALiX;alpha-Est9;Best1;betaTub97EF;Btk29A;CAP;CG10098;CG10103;CG10126;CG10527;CG10874;CG11426;CG13124;CG13255;CG13314;CG13921;CG14073;CG15098;CG18659;CG1890;CG1943;CG2765;CG2991;CG30069;CG30154;CG30423;CG31038;CG31523;CG31694;CG31710;CG34417;CG3529;CG4025;CG4101;CG4199;CG42671;CG42709;CG5004;CG5151;CG5835;CG5953;CG6051;CG6191;CG6231;CG6707;CG7523;CG7546;CG7702;CG9328;CG9795…
5kbUpTx	Jra_top50perTarget	cisbp__M2108	6.48	0.0796	Jra	*		Jra; kay (inferredBy_MotifSimilarity_n_Orthology).	181	4071	a;Act42A;Act5C;ago;Akt1;ALiX;alpha-Est3;alpha-Est9;Best1;betaTub97EF;Btk29A;CAP;CG10098;CG10126;CG10527;CG10874;CG10916;CG11426;CG12007;CG13124;CG13255;CG13314;CG14073;CG15611;CG18659;CG1890;CG1943;CG2765;CG2991;CG30069;CG30423;CG31038;CG31523;CG31694;CG32365;CG34194;CG34417;CG3529;CG4025;CG4101;CG4199;CG42671;CG42709;CG4462;CG5004;CG5151;CG5835;CG5953;CG6051;CG6191;CG6231;CG6707;CG7222;CG7523;CG…
5kbUpTx	Jra_top50perTarget	cisbp__M4623	6.44	0.0793	Jra	**	Jra (inferredBy_Orthology).	kay (inferredBy_MotifSimilarity). cnc (inferredBy_MotifSimilarity_n_Orthology).	202	4316	a;Act42A;Act5C;ago;Akt1;ALiX;alpha-Est3;alpha-Est9;AMPdeam;be;Best1;betaTub97EF;Btk29A;CAP;CG10098;CG10103;CG10126;CG10527;CG10874;CG10916;CG11426;CG13124;CG13255;CG13314;CG13921;CG1407;CG14073;CG15098;CG15611;CG1572;CG17544;CG18659;CG1890;CG1943;CG2765;CG2991;CG30069;CG30154;CG30423;CG31038;CG31523;CG31694;CG31710;CG32365;CG34194;CG34417;CG3529;CG4025;CG4101;CG4199;CG42671;CG42709;CG43110;CG4462…
5kbUpTx	Jra_top50perTarget	cisbp__M4506	6.43	0.0792	Jra	**	Jra (inferredBy_Orthology).	kay (inferredBy_MotifSimilarity). cnc; mor (inferredBy_MotifSimilarity_n_Orthology).	209	4897	a;Act42A;Act5C;ago;Akt1;ALiX;alpha-Est3;alpha-Est9;AMPdeam;be;Best1;betaTub97EF;Btk29A;CalpA;CAP;CG10089;CG10098;CG10103;CG10126;CG10527;CG10874;CG10916;CG11426;CG11658;CG13124;CG13255;CG13314;CG13921;CG1407;CG14073;CG15098;CG15611;CG1572;CG17544;CG18659;CG1890;CG1943;CG2765;CG2991;CG30069;CG30154;CG30423;CG31038;CG31523;CG31694;CG31710;CG31997;CG32365;CG34417;CG3529;CG4025;CG4101;CG4199;CG42671;…
5kbUpTx	Jra_top50perTarget	cisbp__M2279	6.37	0.0787	Jra	*	kay (inferredBy_Orthology).	Jra; mor (inferredBy_MotifSimilarity_n_Orthology).	207	4175	a;Act42A;Act5C;ago;Akt1;ALiX;alpha-Est3;alpha-Est9;be;Best1;betaTub97EF;Btk29A;CalpA;CAP;CG10089;CG10098;CG10103;CG10126;CG10527;CG10874;CG10916;CG11426;CG11658;CG13124;CG13255;CG13314;CG13921;CG1407;CG14073;CG14441;CG15098;CG15611;CG1572;CG17544;CG18659;CG1890;CG1943;CG2765;CG2991;CG30069;CG30154;CG30423;CG31038;CG31523;CG31694;CG31710;CG32365;CG34417;CG3529;CG4025;CG4101;CG4199;CG42671;CG42709;…
5kbUpTx	Jra_top50perTarget	jaspar__MA0303.1	6.35	0.0785	Jra	*		Jra; kay (inferredBy_MotifSimilarity_n_Orthology).	183	4139	a;Act42A;Act5C;ago;Akt1;ALiX;alpha-Est3;alpha-Est9;Best1;betaTub97EF;Btk29A;CAP;CG10098;CG10126;CG10527;CG10874;CG10916;CG11426;CG11658;CG12007;CG13124;CG13255;CG13314;CG14073;CG15611;CG18659;CG1890;CG1943;CG2765;CG2991;CG30069;CG30423;CG31038;CG31523;CG31694;CG32365;CG34194;CG34417;CG3529;CG4025;CG4101;CG4199;CG42671;CG42709;CG4462;CG5004;CG5151;CG5835;CG5953;CG6051;CG6191;CG6231;CG6707;CG7222;C…
5kbUpTx	Jra_top50perTarget	transfac_pro__M01555	6.35	0.0785	Jra	*		Jra; kay (inferredBy_MotifSimilarity_n_Orthology).	193	4634	a;Act42A;Act5C;ago;Akt1;ALiX;alpha-Est3;alpha-Est9;Best1;betaTub97EF;Btk29A;CAP;CG10089;CG10098;CG10126;CG10527;CG10874;CG10916;CG11426;CG11658;CG12007;CG13124;CG13255;CG13314;CG14073;CG15611;CG18659;CG1890;CG1943;CG2765;CG2991;CG30069;CG30423;CG31038;CG31523;CG31694;CG31710;CG32365;CG34194;CG34417;CG3529;CG4025;CG4101;CG4199;CG42671;CG42709;CG4462;CG5004;CG5151;CG5835;CG5953;CG6051;CG6191;CG6231…
5kbUpTx	Jra_top50perTarget	jaspar__MA0477.1	6.33	0.0784	Jra	*	kay (inferredBy_Orthology).	Jra; mor (inferredBy_MotifSimilarity_n_Orthology).	234	4972	a;Act42A;Act5C;ago;Akt1;ALiX;alpha-Est3;alpha-Est9;AMPdeam;Arc1;be;Best1;betaTub97EF;Btk29A;CalpA;CAP;CG10089;CG10098;CG10103;CG10126;CG10527;CG10874;CG10916;CG11426;CG11658;CG12007;CG13124;CG13255;CG13314;CG13921;CG1407;CG14073;CG14441;CG15098;CG15611;CG1572;CG16721;CG17544;CG18659;CG1890;CG1943;CG2765;CG2991;CG30069;CG30154;CG30423;CG31038;CG31523;CG31694;CG31710;CG32365;CG34325;CG34417;CG3529;…
5kbUpTx	Jra_top50perTarget	cisbp__M4607	6.32	0.0782	Jra	*	kay (inferredBy_Orthology).	Jra (inferredBy_MotifSimilarity). cnc; maf-S (inferredBy_MotifSimilarity_n_Orthology).	172	3250	a;Act42A;Act5C;ago;Akt1;ALiX;alpha-Est3;alpha-Est9;Best1;betaTub97EF;Btk29A;CAP;CG10098;CG10103;CG10126;CG10527;CG10874;CG10916;CG11426;CG12007;CG13124;CG13314;CG13921;CG14073;CG15098;CG18659;CG1890;CG1943;CG2765;CG2991;CG30069;CG30423;CG31038;CG31523;CG31694;CG31710;CG32365;CG34417;CG3529;CG4025;CG4101;CG4199;CG42671;CG42709;CG43110;CG5004;CG5151;CG5835;CG5953;CG6051;CG6191;CG6231;CG6707;CG7523;…
5kbUpTx	Jra_top50perTarget	cisbp__M6319	6.22	0.0774	Jra	**	Jra (inferredBy_Orthology).	kay (inferredBy_MotifSimilarity). cnc; mor (inferredBy_MotifSimilarity_n_Orthology).	183	3473	a;Act42A;Act5C;Akt1;ALiX;alpha-Est3;alpha-Est9;Best1;betaTub97EF;Btk29A;CalpA;CAP;CG10089;CG10098;CG10103;CG10126;CG10527;CG10874;CG10916;CG11426;CG11658;CG12007;CG13124;CG13255;CG13314;CG13921;CG14073;CG15098;CG17544;CG18659;CG1890;CG1943;CG2765;CG2991;CG30069;CG30423;CG31038;CG31523;CG31694;CG31710;CG32365;CG34417;CG3529;CG4025;CG4101;CG4199;CG42671;CG42709;CG43110;CG5004;CG5151;CG5521;CG5835;C…
5kbUpTx	Jra_top50perTarget	transfac_public__M00495	6.16	0.0769	Jra	*	cnc (inferredBy_Orthology).	Jra (inferredBy_MotifSimilarity_n_Orthology).	181	4270	a;ago;Akt1;ALiX;alpha-Est3;alpha-Est9;AMPdeam;Best1;betaTub97EF;Btk29A;CAP;CG10089;CG10098;CG10126;CG10527;CG10874;CG10916;CG11426;CG11658;CG12007;CG13124;CG13314;CG13921;CG15098;CG15611;CG18659;CG1890;CG1943;CG2765;CG2991;CG30069;CG30423;CG31038;CG31523;CG31694;CG31710;CG32365;CG34325;CG34382;CG34417;CG3529;CG4025;CG4101;CG4199;CG42671;CG42709;CG43110;CG5004;CG5151;CG5835;CG5953;CG6051;CG6191;CG…
5kbUpTx	Jra_top50perTarget	yetfasco__YEL009C_1363	5.94	0.075	Jra	*		Jra; kay (inferredBy_MotifSimilarity). NFAT; cnc; maf-S; tj (inferredBy_MotifSimilarity_n_Orthology).	182	3938	a;Act42A;Act5C;ago;Akt1;ALiX;alpha-Est3;alpha-Est9;Best1;betaTub97EF;Btk29A;CalpA;CAP;CG10089;CG10098;CG10126;CG10527;CG10874;CG10916;CG11426;CG13124;CG13255;CG13314;CG14073;CG15611;CG17544;CG18659;CG1890;CG1943;CG2765;CG2991;CG30069;CG30154;CG30423;CG31038;CG31523;CG31694;CG31710;CG32365;CG34417;CG3529;CG4025;CG4101;CG4199;CG42671;CG42709;CG43110;CG4462;CG5004;CG5151;CG5835;CG5953;CG6051;CG6191;…
5kbUpTx	Jra_top50perTarget	cisbp__M4625	5.94	0.075	Jra	**	Jra (inferredBy_Orthology).	kay (inferredBy_MotifSimilarity). mor (inferredBy_MotifSimilarity_n_Orthology).	208	4801	a;Act42A;Act5C;ago;Akt1;ALiX;alpha-Est3;alpha-Est9;AMPdeam;be;Best1;betaTub97EF;Btk29A;CAP;CG10089;CG10098;CG10103;CG10126;CG10527;CG10874;CG10916;CG11426;CG11658;CG12007;CG13124;CG13255;CG13314;CG13921;CG1407;CG14073;CG15098;CG15611;CG1572;CG17544;CG18659;CG1890;CG1943;CG2765;CG2991;CG30069;CG30154;CG30423;CG31038;CG31523;CG31694;CG31710;CG32365;CG34417;CG3529;CG4025;CG4101;CG4199;CG42671;CG4270…
5kbUpTx	Jra_top50perTarget	swissregulon__hs__FOS_FOS_B_L1__JUN_B_D_.p2	5.93	0.0749	Jra	**	Jra; kay (inferredBy_Orthology).	mor (inferredBy_MotifSimilarity_n_Orthology).	209	4450	a;Act42A;Act5C;ago;Akt1;ALiX;alpha-Est3;alpha-Est9;Best1;betaTub97EF;Btk29A;CalpA;CAP;CG10089;CG10098;CG10103;CG10126;CG10527;CG10874;CG10916;CG11426;CG11658;CG13124;CG13255;CG13314;CG13921;CG1407;CG14073;CG14441;CG15098;CG15611;CG17544;CG18659;CG1890;CG1943;CG2765;CG2991;CG30069;CG30154;CG30423;CG31038;CG31523;CG31694;CG31710;CG34194;CG34325;CG34417;CG3529;CG4025;CG4101;CG4199;CG42671;CG42709;CG…
5kbUpTx	Jra_top50perTarget	transfac_public__M00038	5.91	0.0747	Jra	*		Jra; kay; mor (inferredBy_MotifSimilarity_n_Orthology).	180	4629	a;Act42A;Act5C;ago;Akt1;ALiX;alpha-Est3;alpha-Est9;AMPdeam;be;Best1;betaTub97EF;Btk29A;CAP;CG10089;CG10098;CG10126;CG10527;CG10874;CG10916;CG11426;CG11658;CG13124;CG13255;CG13314;CG14441;CG15611;CG1572;CG17544;CG18659;CG1890;CG1943;CG2765;CG2991;CG30069;CG31038;CG31523;CG31694;CG31710;CG32365;CG34194;CG34417;CG3529;CG4025;CG4101;CG4199;CG42671;CG42709;CG43110;CG4462;CG5004;CG5151;CG5835;CG5953;CG…
5kbUpTx	Jra_top50perTarget	cisbp__M0320	5.87	0.0744	Jra	**	Jra (inferredBy_Orthology).	kay (inferredBy_MotifSimilarity_n_Orthology).	181	4712	a;Akt1;ALiX;alpha-Est9;Arc1;Best1;betaTub97EF;Btk29A;CalpA;CAP;CG10089;CG10098;CG10103;CG10126;CG10527;CG10660;CG10874;CG11426;CG11658;CG12007;CG13314;CG14073;CG1513;CG15611;CG1572;CG18659;CG1890;CG1943;CG30069;CG30423;CG31038;CG31523;CG31694;CG32365;CG34382;CG34417;CG4025;CG4101;CG42671;CG4462;CG5004;CG5151;CG5521;CG5835;CG5953;CG6051;CG6191;CG6231;CG6707;CG7523;CG7546;CG7675;CG7702;CG8671;CG904…
5kbUpTx	Jra_top50perTarget	neph__UW.Motif.0001	5.87	0.0744	Jra	*		kay (inferredBy_MotifSimilarity). Jra; cnc (inferredBy_MotifSimilarity_n_Orthology).	186	4054	a;Act42A;Act5C;ago;Akt1;ALiX;alpha-Est9;Best1;betaTub97EF;Btk29A;CalpA;CAP;CG10089;CG10098;CG10126;CG10527;CG10874;CG11426;CG11658;CG12007;CG13124;CG13255;CG13314;CG13921;CG14073;CG17544;CG18659;CG1890;CG1943;CG2765;CG2991;CG30069;CG30423;CG31038;CG31523;CG31694;CG31710;CG32365;CG34325;CG34417;CG3529;CG4025;CG4101;CG4199;CG42671;CG42709;CG43110;CG4462;CG5004;CG5151;CG5521;CG5835;CG5953;CG6051;CG6…
5kbUpTx	Jra_top50perTarget	cisbp__M4526	5.87	0.0744	Jra	*	mor (inferredBy_Orthology).	Jra; cnc; ewg; kay; maf-S; tj (inferredBy_MotifSimilarity_n_Orthology).	216	4892	a;Act42A;Act5C;ago;Akt1;ALiX;alpha-Est3;alpha-Est9;AMPdeam;be;Best1;betaTub97EF;Btk29A;CAP;CG10098;CG10103;CG10126;CG10527;CG10874;CG10916;CG11426;CG11658;CG13124;CG13255;CG13314;CG13921;CG1407;CG14073;CG14441;CG15098;CG15611;CG1572;CG16721;CG17544;CG18659;CG1890;CG1943;CG2765;CG2991;CG30069;CG30154;CG30423;CG31038;CG31523;CG31694;CG31710;CG32365;CG34194;CG34325;CG34417;CG3529;CG4025;CG4101;CG419…
5kbUpTx	Jra_top50perTarget	swissregulon__hs__BACH2.p2	5.85	0.0742	Jra	*	cnc (inferredBy_Orthology).	Jra; kay; mor (inferredBy_MotifSimilarity_n_Orthology).	168	3260	a;Act42A;Act5C;Akt1;ALiX;alpha-Est3;alpha-Est9;AMPdeam;Best1;betaTub97EF;Btk29A;CAP;CG10098;CG10126;CG10527;CG10874;CG10916;CG11426;CG13124;CG13314;CG13921;CG15098;CG15611;CG1572;CG17544;CG18659;CG1890;CG1943;CG2765;CG2991;CG30069;CG30423;CG31038;CG31523;CG31694;CG31710;CG32365;CG34325;CG34417;CG3529;CG4025;CG4101;CG4199;CG42671;CG42709;CG43110;CG5004;CG5151;CG5521;CG5835;CG5953;CG6051;CG6191;CG6…
5kbUpTx	Jra_top50perTarget	cisbp__M6317	5.77	0.0736	Jra	**	Jra (inferredBy_Orthology).	kay; mor (inferredBy_MotifSimilarity_n_Orthology).	207	4917	a;Act42A;Act5C;ago;Akt1;ALiX;alpha-Est3;alpha-Est9;AMPdeam;be;Best1;betaTub97EF;Btk29A;CAP;CG10089;CG10098;CG10103;CG10126;CG10527;CG10874;CG10916;CG11426;CG11658;CG13124;CG13255;CG13314;CG13921;CG14073;CG15098;CG15611;CG1572;CG16721;CG17544;CG18659;CG1890;CG1943;CG2765;CG2991;CG30069;CG30423;CG31038;CG31523;CG31694;CG31710;CG32365;CG34417;CG3529;CG4025;CG4101;CG4199;CG42671;CG42709;CG43110;CG446…
5kbUpTx	Jra_top50perTarget	cisbp__M2428	5.73	0.0732	Jra	*		Jra; kay (inferredBy_MotifSimilarity_n_Orthology).	181	4182	a;Act42A;Act5C;ago;Akt1;ALiX;alpha-Est3;alpha-Est9;AMPdeam;be;Best1;betaTub97EF;Btk29A;CAP;CG10089;CG10098;CG10126;CG10527;CG10874;CG10916;CG11426;CG11658;CG13124;CG13255;CG13314;CG14441;CG15611;CG1572;CG18659;CG1890;CG1943;CG2765;CG2991;CG30069;CG30423;CG31038;CG31523;CG31694;CG31710;CG32365;CG34194;CG34325;CG34417;CG3529;CG4025;CG4101;CG4199;CG42671;CG42709;CG43110;CG4462;CG5004;CG5151;CG5835;C…
5kbUpTx	Jra_top50perTarget	hocomoco__JUNB_MOUSE.H10MO.B	5.42	0.0707	Jra	**	Jra (inferredBy_Orthology).	kay; mor (inferredBy_MotifSimilarity_n_Orthology).	169	3257	a;Act42A;Act5C;ago;Akt1;ALiX;alpha-Est9;Best1;betaTub97EF;Btk29A;CAP;CG10098;CG10103;CG10126;CG10527;CG11426;CG11658;CG13124;CG13255;CG13314;CG13921;CG14073;CG15098;CG15611;CG17544;CG18659;CG1890;CG1943;CG2765;CG2991;CG30069;CG30423;CG31038;CG31523;CG31694;CG31710;CG32365;CG34417;CG3529;CG4025;CG4101;CG4199;CG42671;CG42709;CG43110;CG5004;CG5151;CG5521;CG5835;CG5953;CG6051;CG6191;CG6707;CG7222;CG7…
5kbUpTx	Jra_top50perTarget	transfac_pro__M04846	5.08	0.0677	Jra	*		Jra; kay (inferredBy_MotifSimilarity).	96	1830	a;ago;ALiX;alpha-Est9;Best1;Btk29A;CAP;CG10098;CG10126;CG10527;CG13124;CG13314;CG14073;CG18659;CG1890;CG1943;CG30423;CG34417;CG4025;CG4101;CG42671;CG42709;CG5004;CG5151;CG5835;CG5953;CG6191;CG6707;CG7546;CG7702;CG9328;Chd64;cib;cindr;Cortactin;cpo;Diap1;dock;Fas1;Fas3;Fhos;fng;hebe;hid;hppy;Hr4;InR;insc;jar;Jra;jvl;Khc-73;Lac;Lis-1;lute;mbl;mub;Myo31DF;Pak3;Pld;Ptp99A;puc;Pvf1;Rab11;Rab30;Rab8;Ra…
5kbUpTx	Jra_top50perTarget	homer__NATGASTCABNN_Fosl2	5.02	0.0672	Jra	*	kay (inferredBy_Orthology).	Jra (inferredBy_MotifSimilarity). cnc; mor (inferredBy_MotifSimilarity_n_Orthology).	164	3408	a;Act42A;Act5C;ago;Akt1;ALiX;alpha-Est9;Best1;betaTub97EF;Btk29A;CAP;CG10098;CG10126;CG10527;CG10874;CG10916;CG11426;CG13124;CG13255;CG13314;CG13921;CG14073;CG15098;CG17544;CG18659;CG1890;CG1943;CG2765;CG2991;CG30069;CG30423;CG31038;CG31523;CG31694;CG31710;CG32365;CG34417;CG3529;CG4025;CG4101;CG4199;CG42671;CG42709;CG43110;CG4462;CG5004;CG5151;CG5835;CG5953;CG6051;CG6191;CG6707;CG7523;CG7546;CG77…
5kbUpTx	Jra_top50perTarget	hocomoco__BATF_HUMAN.H10MO.S	4.8	0.0653	Jra	*		Jra; kay (inferredBy_MotifSimilarity_n_Orthology).	195	4243	a;Act42A;Act5C;ago;Akt1;ALiX;alpha-Est3;alpha-Est9;AMPdeam;Best1;betaTub97EF;Btk29A;CalpA;CAP;CG10089;CG10098;CG10126;CG10527;CG10874;CG10916;CG11426;CG12007;CG12883;CG13124;CG13255;CG13314;CG13921;CG14073;CG14441;CG15611;CG1572;CG17544;CG18659;CG1890;CG1943;CG2765;CG2991;CG30069;CG30423;CG31038;CG31523;CG31694;CG31710;CG32365;CG34417;CG3529;CG4025;CG4101;CG4199;CG42671;CG42709;CG43110;CG4462;CG5…
5kbUpTx	Jra_top50perTarget	hocomoco__SMRC1_MOUSE.H10MO.B	4.66	0.0642	Jra	*	mor (inferredBy_Orthology).	Jra; cnc; ewg; kay; maf-S; tj (inferredBy_MotifSimilarity_n_Orthology).	188	4071	a;Act42A;Act5C;Akt1;ALiX;alpha-Est3;alpha-Est9;Best1;betaTub97EF;Btk29A;CalpA;CAP;CG10089;CG10098;CG10103;CG10126;CG10527;CG10916;CG11426;CG11658;CG13124;CG13255;CG13314;CG13921;CG1407;CG14073;CG14441;CG15098;CG15611;CG17544;CG18659;CG1890;CG1943;CG2765;CG2991;CG30069;CG30154;CG30423;CG31038;CG31523;CG31694;CG31710;CG34194;CG34417;CG3529;CG4025;CG4101;CG4199;CG42671;CG42709;CG43110;CG5004;CG5151;…
5kbUpTx	Jra_top50perTarget	transfac_pro__M03870	4.62	0.0639	Jra	*	kay (inferredBy_Orthology).	Jra (inferredBy_MotifSimilarity_n_Orthology).	155	3083	a;Act42A;ago;Akt1;ALiX;alpha-Est9;Best1;betaTub97EF;Btk29A;CAP;CG10089;CG10098;CG10126;CG10527;CG10660;CG10874;CG10916;CG11426;CG13124;CG13314;CG13921;CG14073;CG1513;CG18659;CG1890;CG1943;CG2765;CG2991;CG30069;CG30423;CG31038;CG31523;CG31710;CG31997;CG34382;CG34417;CG3529;CG4025;CG4101;CG4199;CG42671;CG4462;CG5004;CG5151;CG5521;CG5835;CG5953;CG6051;CG6191;CG6707;CG7222;CG7523;CG7702;CG9304;CG9328…
5kbUpTx	Jra_top50perTarget	yetfasco__YBL103C_1445	4.62	0.0638	Jra	*		Jra; kay (inferredBy_MotifSimilarity).	170	4294	a;Act42A;Act5C;ago;ALiX;alpha-Est9;Ank;Best1;betaTub97EF;Btk29A;CAP;CG10098;CG10126;CG10527;CG10731;CG10874;CG10916;CG11426;CG12007;CG13124;CG13255;CG13314;CG13921;CG14073;CG17544;CG18659;CG1890;CG1943;CG2765;CG2991;CG30069;CG30423;CG31038;CG31523;CG31694;CG31710;CG32365;CG34325;CG34417;CG3529;CG4025;CG4101;CG4199;CG42671;CG42709;CG5004;CG5151;CG5835;CG5953;CG6051;CG6191;CG6231;CG6707;CG7222;CG75…
5kbUpTx	Jra_top50perTarget	cisbp__M6467	4.61	0.0637	Jra	*	mor (inferredBy_Orthology).	Jra; cnc; ewg; kay; maf-S; tj (inferredBy_MotifSimilarity_n_Orthology).	193	4331	a;Act42A;Act5C;ago;Akt1;ALiX;alpha-Est3;alpha-Est9;Best1;betaTub97EF;Btk29A;CalpA;CAP;CG10089;CG10098;CG10103;CG10126;CG10527;CG10916;CG11426;CG11658;CG13124;CG13255;CG13314;CG13921;CG1407;CG14073;CG14441;CG15098;CG15611;CG17544;CG18659;CG1890;CG1943;CG2765;CG2991;CG30069;CG30154;CG30423;CG31038;CG31523;CG31694;CG31710;CG32365;CG34194;CG34417;CG3529;CG4025;CG4101;CG4199;CG42671;CG42709;CG43110;CG…
5kbUpTx	Jra_top50perTarget	cisbp__M6158	4.44	0.0623	Jra	*		Jra; kay (inferredBy_MotifSimilarity_n_Orthology).	198	4368	a;Act42A;Act5C;ago;Akt1;ALiX;alpha-Est3;alpha-Est9;AMPdeam;Best1;betaTub97EF;Btk29A;CalpA;CAP;CG10089;CG10098;CG10126;CG10527;CG10874;CG10916;CG11426;CG12007;CG12883;CG13124;CG13255;CG13314;CG13921;CG14073;CG14441;CG15611;CG1572;CG17544;CG18659;CG1890;CG1943;CG2765;CG2991;CG30069;CG30423;CG31038;CG31523;CG31694;CG31710;CG32365;CG34417;CG3529;CG4025;CG4101;CG4199;CG42671;CG42709;CG43110;CG4462;CG5…
5kbUpTx	Jra_top50perTarget	hocomoco__SMRC1_HUMAN.H10MO.D	4.34	0.0615	Jra	*	mor (inferredBy_Orthology).	Jra; cnc; ewg; kay; maf-S; tj (inferredBy_MotifSimilarity_n_Orthology).	159	3664	a;Act42A;Act5C;ago;Akt1;ALiX;alpha-Est3;alpha-Est9;Best1;betaTub97EF;Btk29A;CalpA;CAP;CG10098;CG10126;CG10527;CG11426;CG13124;CG13314;CG13921;CG15098;CG15611;CG1572;CG17544;CG18659;CG1890;CG1943;CG2765;CG2991;CG30069;CG30154;CG30423;CG31038;CG31523;CG31710;CG32365;CG34417;CG3529;CG4025;CG4101;CG4199;CG42671;CG42709;CG43110;CG4462;CG5004;CG5151;CG5521;CG5835;CG5953;CG6051;CG6191;CG6231;CG6707;CG77…
5kbUpTx	Jra_top50perTarget	transfac_pro__M07400	4.25	0.0607	Jra	*		Jra; kay (inferredBy_MotifSimilarity_n_Orthology).	200	4843	a;Act42A;Act5C;ago;Akt1;ALiX;alpha-Est9;be;Best1;betaTub97EF;Btk29A;CAP;CG10089;CG10098;CG10103;CG10126;CG10527;CG10660;CG10916;CG11426;CG11658;CG13124;CG13255;CG13314;CG13921;CG1407;CG14073;CG14441;CG15098;CG1513;CG1572;CG17544;CG18659;CG1890;CG1943;CG2765;CG2991;CG30069;CG30423;CG31038;CG31523;CG31694;CG31710;CG32365;CG34325;CG34417;CG3529;CG4025;CG4101;CG4199;CG42671;CG42709;CG43110;CG5004;CG5…
5kbUpTx	Jra_top50perTarget	cisbp__M6228	4.01	0.0586	Jra	*	kay (inferredBy_Orthology).	Jra (inferredBy_MotifSimilarity_n_Orthology).	196	4933	a;Act42A;Act5C;ago;Akt1;ALiX;alpha-Est9;AMPdeam;Ank;be;Best1;betaTub97EF;Btk29A;CAP;CG10098;CG10103;CG10126;CG10527;CG10874;CG10916;CG11426;CG11658;CG12007;CG13124;CG13921;CG14073;CG15098;CG15611;CG1572;CG17544;CG18659;CG1890;CG1943;CG2765;CG2991;CG30069;CG30423;CG31038;CG31523;CG31694;CG31710;CG32365;CG34325;CG34417;CG3529;CG4025;CG4101;CG4199;CG42671;CG42709;CG43110;CG4462;CG5004;CG5151;CG5521;…
5kbUpTx	Jra_top50perTarget	transfac_public__M00517	4.01	0.0586	Jra	**	Jra; kay (inferredBy_Orthology).	cnc; maf-S; tj (inferredBy_MotifSimilarity_n_Orthology).	181	4313	a;Act42A;Act5C;ago;Akt1;ALiX;alpha-Est9;AMPdeam;Best1;betaTub97EF;Btk29A;CAP;CG10089;CG10098;CG10126;CG10527;CG10874;CG10916;CG11426;CG13124;CG13255;CG13314;CG13921;CG15098;CG15611;CG17544;CG18659;CG1890;CG1943;CG2765;CG2991;CG30069;CG30423;CG31038;CG31523;CG31694;CG31710;CG32365;CG34382;CG34417;CG3529;CG4025;CG4101;CG4199;CG42671;CG42709;CG43110;CG4462;CG5004;CG5151;CG5835;CG5953;CG6051;CG6191;C…
5kbUpTx	Jra_top50perTarget	stark__TGANTCA	3.97	0.0583	Jra	**	Jra; kay (directAnnotation).		189	4348	a;Act42A;Act5C;ago;Akt1;ALiX;alpha-Est9;be;Best1;betaTub97EF;Btk29A;CAP;CG10089;CG10098;CG10103;CG10126;CG10527;CG10660;CG10874;CG10916;CG11426;CG11658;CG13124;CG13255;CG13314;CG13921;CG1407;CG14073;CG15098;CG17544;CG18659;CG1890;CG1943;CG2765;CG2991;CG30069;CG30423;CG31038;CG31523;CG31694;CG31710;CG32365;CG34194;CG34325;CG34417;CG4025;CG4101;CG42671;CG42709;CG43110;CG5004;CG5151;CG5521;CG5835;CG…
5kbUpTx	Jra_top50perTarget	hocomoco__FOSB_MOUSE.H10MO.C	3.84	0.0572	Jra	*	kay (inferredBy_Orthology).	Jra (inferredBy_MotifSimilarity_n_Orthology).	180	4231	a;Act42A;Act5C;ago;Akt1;ALiX;alpha-Est9;AMPdeam;be;Best1;betaTub97EF;Btk29A;CAP;CG10098;CG10103;CG10126;CG10527;CG10874;CG10916;CG11426;CG11658;CG13124;CG13255;CG13921;CG14073;CG15098;CG15611;CG17544;CG18659;CG1890;CG1943;CG2765;CG2991;CG30069;CG30423;CG31038;CG31523;CG31694;CG31710;CG32365;CG34325;CG34417;CG3529;CG4025;CG4101;CG4199;CG42671;CG42709;CG43110;CG4462;CG5004;CG5151;CG5521;CG5835;CG59…
5kbUpTx	Jra_top50perTarget	transfac_pro__M03866	3.84	0.0572	Jra	**	Jra; kay (inferredBy_Orthology).	mor (inferredBy_MotifSimilarity_n_Orthology).	187	4287	a;Act42A;Act5C;Akt1;ALiX;alpha-Est3;alpha-Est9;Best1;betaTub97EF;Btk29A;CalpA;CAP;CG10089;CG10098;CG10126;CG10527;CG10874;CG10916;CG11426;CG11658;CG12007;CG13124;CG13255;CG13314;CG13921;CG14073;CG15098;CG1513;CG15611;CG17544;CG18659;CG1890;CG1943;CG2765;CG2991;CG30069;CG30423;CG31038;CG31523;CG31694;CG31710;CG32365;CG34417;CG3529;CG4025;CG4101;CG4199;CG42671;CG42709;CG43110;CG4462;CG5004;CG5151;C…
5kbUpTx	Jra_top50perTarget	homer__TGCTGAGTCA_Bach2	3.81	0.057	Jra	*	cnc (inferredBy_Orthology).	Jra; kay; maf-S; tj (inferredBy_MotifSimilarity_n_Orthology).	197	4999	a;Act42A;Act5C;ago;Akt1;ALiX;alpha-Est3;alpha-Est9;AMPdeam;be;Best1;betaTub97EF;Btk29A;CAP;CG10089;CG10098;CG10103;CG10126;CG10527;CG10660;CG10874;CG11426;CG12007;CG13124;CG13255;CG13314;CG13921;CG1407;CG14073;CG15098;CG15611;CG1572;CG16721;CG17544;CG18659;CG1882;CG1890;CG1943;CG2765;CG2991;CG30069;CG30423;CG31038;CG31523;CG31694;CG31710;CG32365;CG34417;CG3529;CG4025;CG4101;CG4199;CG42671;CG42709…
5kbUpTx	Jra_top50perTarget	transfac_pro__M01267	3.78	0.0567	Jra	*	kay (inferredBy_Orthology).	Jra (inferredBy_MotifSimilarity_n_Orthology).	189	4905	a;Act42A;Act5C;ago;ALiX;alpha-Est9;Best1;betaTub97EF;Btk29A;CalpA;CAP;CG10089;CG10098;CG10126;CG10527;CG10874;CG10916;CG11426;CG11658;CG12007;CG13124;CG13255;CG13314;CG13921;CG14073;CG15611;CG17544;CG18659;CG1890;CG1943;CG2765;CG2991;CG30069;CG30423;CG31038;CG31523;CG31694;CG31710;CG32365;CG34417;CG3529;CG4025;CG4101;CG4199;CG42671;CG42709;CG43110;CG4462;CG5004;CG5151;CG5521;CG5835;CG5953;CG6051;…
5kbUpTx	Jra_top50perTarget	transfac_public__M00037	3.48	0.0542	Jra	*	cnc; maf-S (inferredBy_Orthology).	Jra; ewg; kay; tj (inferredBy_MotifSimilarity_n_Orthology).	108	2144	a;Act42A;ago;Akt1;alpha-Est3;alpha-Est9;Best1;Btk29A;CAP;CG10098;CG10126;CG10527;CG1890;CG1943;CG30069;CG30423;CG31038;CG31523;CG31710;CG34417;CG3529;CG4025;CG4101;CG42671;CG42709;CG43110;CG5151;CG5835;CG6051;CG6191;CG6231;CG6707;CG7702;CG9328;CG9801;Chd64;cib;cindr;cpo;Diap1;dock;E(spl)mbeta-HLH;ebd2;edl;Fas3;Fhos;fng;Gli;hebe;hid;Hr39;Hr4;ifc;InR;insc;jar;Jra;jvl;Khc-73;koi;Lac;Lapsyn;Lerp;Lis-…
5kbUpTx	Jra_top50perTarget	transfac_pro__M07678	3.43	0.0538	Jra	*	crc (directAnnotation).	Atf-2; Atf3; CG44247; CrebA; CrebB; Jra; kay (inferredBy_MotifSimilarity). Xbp1 (inferredBy_MotifSimilarity_n_Orthology).	58	1159	ALiX;alpha-Est9;AMPdeam;CG10395;CG12007;CG13124;CG1513;CG15611;CG1572;CG17544;CG30069;CG34325;CG34417;CG5151;CG6051;CG6218;CG6231;CG9304;CG9328;CG9801;Chd64;cpo;Esp;Fhos;Hr4;Jra;mbl;Mekk1;mub;Myo31DF;p120ctn;Patronin;Pdk1;Pka-R2;Ptp99A;puc;Rab11;raw;RhoGAP68F;RhoU;rush;scb;sgg;shep;siz;sky;Spn55B;sra;Synd;Tm1;Tsp42Ea;Tsp42Ee;Ubi-p63E;Wbp2;wun;Xrp1;yellow-c;Zasp52
5kbUpTx	Jra_top50perTarget	transfac_pro__M00925	3.42	0.0537	Jra	**	Jra; kay (inferredBy_Orthology).		165	3858	a;Act42A;Act5C;Akt1;ALiX;alpha-Est9;Best1;betaTub97EF;Btk29A;CalpA;CAP;CG10089;CG10098;CG10126;CG10527;CG10660;CG10874;CG10916;CG11426;CG11658;CG11807;CG13124;CG13255;CG13314;CG13921;CG14073;CG17544;CG18659;CG1890;CG1943;CG2765;CG2991;CG30069;CG30423;CG31038;CG31523;CG31694;CG31710;CG32365;CG34382;CG34417;CG3529;CG4025;CG4101;CG4199;CG42671;CG5004;CG5151;CG5835;CG5953;CG6051;CG6191;CG6231;CG6707;…
5kbUpTx	Jra_top50perTarget	transfac_pro__M03551	3.34	0.053	Jra	**	Jra (inferredBy_Orthology).		144	2875	a;Act42A;Act5C;Akt1;ALiX;Best1;betaTub97EF;Btk29A;CAP;CG10089;CG10098;CG10126;CG10527;CG10874;CG11426;CG13124;CG13255;CG13314;CG13921;CG14073;CG15611;CG17544;CG18659;CG1890;CG1943;CG2765;CG2991;CG30069;CG30423;CG31038;CG31523;CG31694;CG31710;CG32365;CG34417;CG4025;CG4101;CG5004;CG5151;CG5835;CG5953;CG6051;CG6191;CG6707;CG7546;CG7702;CG9328;CG9801;Chd64;Chmp1;cib;cindr;Cortactin;cpo;Diap1;dock;E(s…
5kbUpTx	Jra_top50perTarget	transfac_pro__M07600	3.28	0.0524	Jra	*	kay (inferredBy_Orthology).	Jra (inferredBy_MotifSimilarity_n_Orthology).	164	3498	a;Act42A;Act5C;ago;Akt1;ALiX;alpha-Est9;Best1;betaTub97EF;Btk29A;CalpA;CAP;CG10089;CG10098;CG10126;CG10527;CG10916;CG11426;CG11658;CG13124;CG13255;CG13314;CG13921;CG14073;CG15611;CG17544;CG18659;CG1890;CG1943;CG2765;CG2991;CG30069;CG30154;CG30423;CG31038;CG31523;CG31694;CG31710;CG32365;CG34382;CG34417;CG4025;CG4101;CG42671;CG42709;CG43110;CG5004;CG5151;CG5835;CG5953;CG6051;CG6191;CG6231;CG6707;CG…
5kbUpTx	Jra_top50perTarget	transfac_public__M00174	3.26	0.0523	Jra	**	Jra; kay (inferredBy_Orthology).	mor (inferredBy_MotifSimilarity_n_Orthology).	157	3396	a;Act42A;ago;Akt1;ALiX;alpha-Est9;Best1;betaTub97EF;Btk29A;CAP;CG10089;CG10098;CG10126;CG10527;CG10874;CG10916;CG11426;CG13255;CG13314;CG13921;CG17544;CG18659;CG1890;CG1943;CG2765;CG2991;CG30069;CG30154;CG30423;CG31038;CG31523;CG31694;CG31710;CG32365;CG34382;CG34417;CG3529;CG4025;CG4101;CG4199;CG42671;CG42709;CG5004;CG5151;CG5835;CG5953;CG6051;CG6191;CG6707;CG7546;CG7702;CG8066;CG9304;CG9328;CG98…
5kbUpTx	Jra_top50perTarget	transfac_pro__M03869	3.2	0.0518	Jra	*	kay (inferredBy_Orthology).	Jra; cnc; mor (inferredBy_MotifSimilarity_n_Orthology).	143	2900	a;Act42A;Act5C;ALiX;alpha-Est9;Best1;betaTub97EF;Btk29A;CAP;CG10089;CG10098;CG10126;CG10527;CG11426;CG11658;CG13124;CG13255;CG13314;CG13921;CG14073;CG15611;CG17544;CG18659;CG1890;CG1943;CG2765;CG2991;CG30069;CG30423;CG31038;CG31523;CG31694;CG31710;CG32365;CG34417;CG4025;CG4101;CG42671;CG43110;CG5004;CG5151;CG5835;CG5953;CG6051;CG6707;CG7546;CG7702;CG9328;Chd64;cib;cindr;Cortactin;cpo;Diap1;dock;E…
5kbUpTx	Jra_top50perTarget	jaspar__MA0462.1	3.13	0.0512	Jra	**	Jra (inferredBy_Orthology).		171	3730	a;Act42A;Act5C;ago;Akt1;ALiX;alpha-Est3;alpha-Est9;Best1;betaTub97EF;Btk29A;CAP;CG10089;CG10098;CG10126;CG10527;CG10874;CG10916;CG11426;CG12007;CG13124;CG13255;CG13314;CG13921;CG14073;CG18659;CG1890;CG1943;CG2765;CG2991;CG30069;CG30423;CG31038;CG31694;CG31710;CG32365;CG34417;CG3529;CG4025;CG4101;CG4199;CG42671;CG43110;CG5004;CG5151;CG5521;CG5835;CG5953;CG6051;CG6191;CG6218;CG6231;CG6707;CG7546;CG…
5kbUpTx	Jra_top50perTarget	cisbp__M3617	3.13	0.0511	Jra	*	cnc (inferredBy_Orthology).	Jra; ewg; kay; maf-S; tj (inferredBy_MotifSimilarity_n_Orthology).	94	1835	Act42A;ago;Akt1;alpha-Est3;Best1;Btk29A;CAP;CG10098;CG10527;CG18659;CG1890;CG1943;CG30069;CG30423;CG31038;CG31523;CG31710;CG34417;CG4025;CG4101;CG42671;CG42709;CG43110;CG5151;CG5835;CG6051;CG6191;CG6231;CG6707;CG9328;Chd64;cib;cindr;cpo;Diap1;dock;E(spl)mbeta-HLH;ebd2;edl;Fas3;Fhos;fng;hebe;hid;Hr4;ifc;InR;insc;jar;Jra;Khc-73;Lac;Lapsyn;Lis-1;mbl;mthl5;mub;Myo31DF;Patronin;pcs;Pka-R2;Pld;prominin…
5kbUpTx	Jra_top50perTarget	swissregulon__hs__NFE2.p2	3.11	0.051	Jra	*	cnc (inferredBy_Orthology).	Jra; ewg; kay; maf-S; tj (inferredBy_MotifSimilarity_n_Orthology).	132	2470	a;Act42A;Act5C;ago;Akt1;ALiX;alpha-Est3;alpha-Est9;Best1;Btk29A;CAP;CG10098;CG10126;CG10527;CG11426;CG13124;CG13921;CG14441;CG15611;CG1572;CG17544;CG18659;CG1890;CG1943;CG2991;CG30069;CG30423;CG31038;CG31523;CG31710;CG34417;CG4025;CG4101;CG4199;CG42671;CG42709;CG43110;CG5151;CG5835;CG6051;CG6191;CG6231;CG6707;CG7702;CG9044;CG9328;CG9801;Chd64;cib;cindr;Cortactin;cpo;Diap1;dock;E(spl)mbeta-HLH;ebd…
5kbUpTx	Jra_top50perTarget	cisbp__M0322	3.07	0.0506	Jra	*		Jra (inferredBy_MotifSimilarity_n_Orthology).	150	3678	a;Akt1;ALiX;alpha-Est9;Best1;betaTub97EF;Btk29A;CAP;CG10089;CG10098;CG10126;CG10527;CG10874;CG11426;CG13124;CG13255;CG13314;CG14073;CG14441;CG1513;CG17544;CG1890;CG1943;CG2991;CG30069;CG30423;CG31038;CG31523;CG31710;CG32365;CG34417;CG4025;CG4101;CG42671;CG42709;CG4462;CG5004;CG5151;CG5521;CG5835;CG5953;CG6051;CG6191;CG6231;CG6707;CG7222;CG7546;CG7702;CG9044;CG9304;CG9328;Chd64;cib;cindr;Cortactin…
5kbUpTx	Jra_top50perTarget	transfac_public__M00199	3.02	0.0503	Jra	**	Jra; kay (inferredBy_Orthology).		201	4949	a;Act42A;Act5C;ago;Akt1;ALiX;alpha-Est3;alpha-Est9;AMPdeam;be;Best1;betaTub97EF;Btk29A;CalpA;CAP;CG10089;CG10098;CG10126;CG10527;CG10874;CG10916;CG11426;CG11658;CG13124;CG13255;CG13314;CG13921;CG14073;CG14441;CG15611;CG1572;CG17544;CG18659;CG1890;CG1943;CG2765;CG2991;CG30069;CG30423;CG31038;CG31523;CG31694;CG31710;CG32365;CG34417;CG3529;CG4025;CG4101;CG4199;CG42671;CG42709;CG43110;CG5004;CG5151;C…
5kbUpTx	Jra_top50perTarget	elemento__TGACTCA	3.01	0.0501	Jra	*		Jra (inferredBy_MotifSimilarity_n_Orthology).	146	2853	a;Act42A;Act5C;ALiX;alpha-Est9;Best1;betaTub97EF;Btk29A;CAP;CG10089;CG10098;CG10126;CG10527;CG10874;CG11426;CG11658;CG13124;CG13255;CG13314;CG14073;CG17544;CG18659;CG1890;CG1943;CG2765;CG2991;CG30069;CG30423;CG31038;CG31523;CG31694;CG31710;CG32365;CG34417;CG4025;CG4101;CG4199;CG42671;CG43110;CG5004;CG5151;CG5835;CG5953;CG6051;CG6191;CG6231;CG6707;CG7546;CG7702;CG9328;CG9801;Chd64;cib;cindr;Cortac…
5kbUpTx	Jra_top50perTarget	transfac_pro__M00924	3.01	0.0501	Jra	**	Jra; kay (inferredBy_Orthology).		130	2920	a;ago;Akt1;ALiX;alpha-Est9;Best1;betaTub97EF;Btk29A;CalpA;CAP;CG10089;CG10126;CG10527;CG10660;CG11426;CG13314;CG15611;CG1890;CG2765;CG2991;CG30069;CG30423;CG31038;CG31523;CG31710;CG32365;CG34382;CG34417;CG3529;CG4025;CG4101;CG4199;CG42709;CG5004;CG5151;CG5835;CG5953;CG6051;CG6191;CG6707;CG7546;CG7702;CG9328;CG9427;Chd64;cib;cindr;cpo;Diap1;dock;edl;Fas1;Fas3;Fhos;fng;Gli;hebe;hid;hppy;Hr39;Hr4;if…
5kbUpTx	Jra_w001	hocomoco__FOSL1_HUMAN.H10MO.A	5.28	0.0498	Jra	*	kay (inferredBy_Orthology).	Jra (inferredBy_MotifSimilarity).	883	3380	14-3-3epsilon;14-3-3zeta;18w;a;Abl;Abp1;Act42A;Act5C;Actn;Ada2b;Ady43A;ago;AGO1;AGO2;Akap200;Akt1;ALiX;alph;alpha-Est10;alpha-Est3;alpha-Est7;alpha-Est9;alphaTub84B;AnxB9;aop;AP-1mu;aph-1;aPKC;apt;Arf79F;Argk;Arp1;Arp3;Arpc1;Arpc2;Arpc4;Arpc5;aru;Asap;ASPP;Atf3;Atg1;Atg17;atl;Atpalpha;ATPCL;B4;babos;barc;bark;baz;bbg;bdg;beat-IIIc;Best1;beta-Spec;betaggt-I;betaTub60D;betaTub97EF;bif;blow;bru2;Bsg…
5kbUpTx	Jra_w001	jaspar__MA0490.1	5.25	0.0497	Jra	**	Jra (inferredBy_Orthology).	kay (inferredBy_MotifSimilarity). mor (inferredBy_MotifSimilarity_n_Orthology).	1136	4915	14-3-3epsilon;14-3-3zeta;18w;a;aay;Abi;Abl;Abp1;Act42A;Act5C;Actn;Ada2b;Adar;AdipoR;Ady43A;ago;AGO1;AGO2;AhcyL1;Akap200;Akt1;Aldh-III;Alg-2;ALiX;alph;alpha-Est10;alpha-Est3;alpha-Est7;alpha-Est9;alpha-Man-IIb;alphaTub84B;AMPdeam;AnxB9;aop;AP-1gamma;AP-1mu;AP-1sigma;Apc;aph-1;aPKC;Aps;apt;Arc2;Arf79F;Argk;Arp1;Arp2;Arp3;Arpc1;Arpc2;Arpc4;Arpc5;aru;Asap;Asph;ASPP;Atf3;Atf6;Atg1;Atg17;Atg18a;Atg4a;A…
5kbUpTx	Jra_w001	transfac_pro__M02876	5.25	0.0496	Jra	*		Jra; kay (inferredBy_MotifSimilarity).	718	2752	14-3-3zeta;18w;a;Abi;Abl;Act42A;Act5C;Actn;Adgf-A;ago;AGO1;AGO2;Akap200;Aldh-III;Alg-2;ALiX;alph;alpha-Est9;alpha-Spec;alphaTub84B;AnxB10;AnxB9;aop;AP-1mu;aph-1;apt;Arf51F;Arf79F;Argk;Arp1;Arp2;Arp3;Arpc1;Arpc2;ASPP;Atf3;Atg1;Atg4a;Atpalpha;B4;babos;barc;bark;baz;bbg;beat-IIIc;Best1;betaTub60D;betaTub97EF;bif;blow;Bmcp;bru2;Bsg;Btk29A;btsz;bun;bves;by;c12.1;cact;Cam;CAP;Caper;capt;Cbl;CdGAPr;cdi;…
5kbUpTx	Jra_w001	cisbp__M4570	5.23	0.0495	Jra	**	Jra (inferredBy_Orthology).	cnc; kay; mor (inferredBy_MotifSimilarity_n_Orthology).	1051	4590	14-3-3epsilon;14-3-3zeta;18w;a;Abl;Abp1;Act42A;Act5C;Actn;Ada2b;Ady43A;ago;AGO1;AGO2;AhcyL1;Akap200;Akt1;Aldh-III;Alg-2;ALiX;alph;alpha-Est10;alpha-Est3;alpha-Est7;alpha-Est9;alpha-Man-IIb;alpha-Spec;alphaTub84B;AMPdeam;AnxB10;AnxB9;aop;AP-1gamma;AP-1mu;Apc;aph-1;aPKC;Aps;apt;Arc2;Arf51F;Arf79F;Argk;Arp1;Arp2;Arp3;Arpc1;Arpc2;aru;ASPP;Atf3;Atf6;Atg1;Atg4a;atl;Atpalpha;B4;babos;Baldspot;barc;bark;…
5kbUpTx	Jra_w001	jaspar__MA0478.1	5.23	0.0495	Jra	*	kay (inferredBy_Orthology).	Jra (inferredBy_MotifSimilarity). mor (inferredBy_MotifSimilarity_n_Orthology).	1023	4332	14-3-3epsilon;14-3-3zeta;18w;a;Abi;Abl;Abp1;Act42A;Act5C;Actn;Ada2b;AdipoR;Ady43A;ago;AGO1;AGO2;Akap200;Akt1;Aldh-III;Alg-2;ALiX;alph;alpha-Est3;alpha-Est7;alpha-Est9;alpha-Man-IIb;alpha-Spec;alphaTub84B;AMPdeam;AnxB9;aop;AP-1mu;AP-1sigma;aph-1;aPKC;apt;Arc2;Arf79F;Argk;Arp1;Arp2;Arp3;Arpc1;Arpc2;Arpc4;Asap;Asph;ASPP;Atf3;Atf6;Atg1;Atg17;Atg18a;Atg4a;atl;Atpalpha;ATPCL;B4;babos;Baldspot;barc;bark…
5kbUpTx	Jra_w001	cisbp__M2291	5.21	0.0494	Jra	**	Jra (inferredBy_Orthology).	kay (inferredBy_MotifSimilarity). mor (inferredBy_MotifSimilarity_n_Orthology).	953	3849	14-3-3epsilon;14-3-3zeta;18w;a;Abi;Abl;Abp1;Act42A;Act5C;Actn;Ada2b;Ady43A;ago;AGO1;AGO2;Akap200;Akt1;ALiX;alph;alpha-Est3;alpha-Est7;alpha-Est9;alphaTub84B;AMPdeam;AnxB9;aop;AP-1mu;aph-1;aPKC;apt;Arf51F;Arf79F;Argk;Arp1;Arp2;Arp3;Arpc1;Arpc2;Arpc4;Arpc5;aru;Asph;ASPP;Atf3;Atg1;Atg17;Atg18a;Atg4a;atl;Atpalpha;ATPCL;B4;babos;Baldspot;barc;bark;baz;bbg;bdg;beat-IIIc;Best1;beta-Spec;betaggt-I;betaTu…
5kbUpTx	Jra_w001	cisbp__M4623	5.17	0.0492	Jra	**	Jra (inferredBy_Orthology).	kay (inferredBy_MotifSimilarity). cnc (inferredBy_MotifSimilarity_n_Orthology).	1039	4561	14-3-3epsilon;14-3-3zeta;18w;a;Abi;Abl;Act42A;Act5C;Actn;Ada2b;Ady43A;Afti;ago;AGO1;AGO2;AhcyL1;Akap200;Akt1;Aldh-III;Alg-2;ALiX;alph;alpha-Est10;alpha-Est3;alpha-Est7;alpha-Est9;alpha-Man-IIb;alpha-Spec;alphaTub84B;AMPdeam;AnxB10;AnxB9;aop;AP-1mu;Apc;aph-1;aPKC;apt;Arc2;Arf51F;Arf79F;Argk;Arp1;Arp2;Arp3;Arpc1;Arpc2;aru;Asap;ASPP;Atf3;Atf6;Atg1;Atg17;Atg18a;Atg4a;Atg8a;atl;Atpalpha;B4;babo;babos;…
5kbUpTx	Jra_w001	jaspar__MA0491.1	5.17	0.0492	Jra	**	Jra (inferredBy_Orthology).	kay (inferredBy_MotifSimilarity). mor (inferredBy_MotifSimilarity_n_Orthology).	1047	4127	14-3-3epsilon;14-3-3zeta;18w;a;Abi;Abl;Abp1;Act42A;Act5C;Actn;Ada2b;Adar;Ady43A;ago;AGO2;AhcyL1;Akap200;Akt1;Alg-2;ALiX;alph;alpha-Est10;alpha-Est3;alpha-Est7;alpha-Est9;alpha-Man-IIb;alphaSnap;alphaTub84B;AMPdeam;AnxB9;aop;AP-1gamma;AP-1mu;aph-1;aPKC;Aps;apt;Arc2;Arf79F;Argk;Arp1;Arp2;Arp3;Arpc1;Arpc2;Arpc4;Arpc5;aru;Asap;Asph;ASPP;Atet;Atf3;Atf6;Atg1;Atg18a;Atg4a;Atg8a;atl;Atpalpha;ATPCL;B4;bab…
5kbUpTx	Jra_w001	cisbp__M2280	5.15	0.0491	Jra	*	kay (inferredBy_Orthology).	Jra (inferredBy_MotifSimilarity). maf-S; mor (inferredBy_MotifSimilarity_n_Orthology).	958	4028	14-3-3epsilon;14-3-3zeta;18w;a;Abi;Abl;Abp1;Act42A;Act5C;Actn;Ada2b;Ady43A;ago;AGO1;AGO2;Akap200;Akt1;Aldh-III;Alg-2;ALiX;alph;alpha-Est3;alpha-Est7;alpha-Est9;alpha-Man-IIb;alphaTub84B;AMPdeam;AnxB9;aop;AP-1mu;aph-1;aPKC;apt;Arf51F;Arf79F;Argk;Arp1;Arp2;Arp3;Arpc1;Arpc2;Arpc4;Asap;Asph;ASPP;Atf3;Atg1;Atg17;Atg4a;atl;Atpalpha;ATPCL;B4;babos;Baldspot;barc;bark;baz;bbg;bdg;be;beat-IIIc;Best1;beta-S…
5kbUpTx	Jra_w001	cisbp__M4607	5.14	0.0491	Jra	*	kay (inferredBy_Orthology).	Jra (inferredBy_MotifSimilarity). cnc; maf-S (inferredBy_MotifSimilarity_n_Orthology).	617	2177	14-3-3epsilon;14-3-3zeta;18w;a;Abl;Act42A;Act5C;Actn;Ady43A;ago;AGO1;AGO2;Akap200;ALiX;alpha-Est9;alphaTub84B;aop;AP-1mu;aph-1;apt;Arf51F;Arf79F;Argk;Arp3;Arpc1;Arpc2;aru;Atf3;Atg1;Atg4a;Atpalpha;B4;babos;barc;bark;baz;bbg;beat-IIIc;Best1;betaggt-I;betaTub60D;betaTub97EF;bif;blow;bru2;Bsg;Btk29A;bun;by;cact;CalpB;Cam;CAP;Caper;capt;CdGAPr;cdi;CenG1A;cer;cert;Cf2;CG10082;CG10098;CG10126;CG10283;CG…
5kbUpTx	Jra_w001	cisbp__M4591	5.11	0.0489	Jra	**	Jra (inferredBy_Orthology).	kay (inferredBy_MotifSimilarity). NFAT; mor (inferredBy_MotifSimilarity_n_Orthology).	964	4064	14-3-3epsilon;14-3-3zeta;18w;a;Abl;Abp1;Act42A;Act5C;Actn;Ada2b;Adk1;Ady43A;ago;AGO1;AGO2;Akap200;Akt1;Aldh-III;ALiX;alph;alpha-Est3;alpha-Est7;alpha-Est9;alpha-Man-IIb;alpha-Spec;alphaTub84B;AnxB9;aop;AP-1gamma;AP-1mu;Apc;aph-1;apt;Arc2;Arf51F;Arf79F;Argk;Arp1;Arp2;Arp3;Arpc1;Arpc2;Arpc5;ASPP;Atf3;Atf6;Atg1;Atg17;Atg18a;Atg4a;atl;Atpalpha;B4;babos;Baldspot;barc;bark;baz;bbg;beat-IIIc;Best1;beta-…
5kbUpTx	Jra_w001	cisbp__M4684	5.08	0.0488	Jra	*		Jra; kay (inferredBy_MotifSimilarity). cnc (inferredBy_MotifSimilarity_n_Orthology).	746	2763	14-3-3epsilon;14-3-3zeta;18w;a;Abl;Abp1;Actn;ago;AGO1;AGO2;Akap200;Aldh-III;ALiX;alph;alpha-Est9;alphaSnap;alphaTub84B;AnxB9;aop;AP-1gamma;AP-1mu;aPKC;apt;Arf51F;Arf79F;Argk;Arp3;Arpc1;Arpc2;Arpc4;Arpc5;Atf3;Atg1;Atg4a;Atpalpha;B4;babos;barc;bark;baz;bbg;beat-IIIc;Best1;beta-Spec;betaTub60D;bif;blow;bru2;Bsg;Btk29A;bun;bves;by;cact;CalpB;Cam;CAP;Caper;capt;Cbl;CdGAPr;CenG1A;cert;Cf2;CG10055;CG100…
5kbUpTx	Jra_w001	scertf__spivak.GCN4	5.05	0.0486	Jra	*		Jra; kay (inferredBy_MotifSimilarity). NFAT; cnc (inferredBy_MotifSimilarity_n_Orthology).	623	2222	14-3-3epsilon;14-3-3zeta;18w;a;Abi;Abl;Abp1;Act5C;Actn;Ady43A;AGO1;AGO2;Akap200;ALiX;alpha-Est9;alphaTub84B;AnxB9;aop;AP-1mu;aph-1;aPKC;apt;Argk;Arp1;Arp2;Arp3;Arpc1;Arpc2;Atf3;Atpalpha;B4;babos;barc;bark;baz;bbg;beat-IIIc;Best1;betaTub60D;bif;blow;bru2;Bsg;Btk29A;btsz;bun;by;cact;CAH2;Cam;CAP;Caper;capt;Cbl;CdGAPr;CenG1A;cer;cert;Cf2;CG10055;CG10082;CG10098;CG10126;CG10283;CG10337;CG10413;CG1052…
5kbUpTx	Jra_w001	cisbp__M2292	5.04	0.0486	Jra	**	Jra (inferredBy_Orthology).	kay (inferredBy_MotifSimilarity). mor (inferredBy_MotifSimilarity_n_Orthology).	998	4110	14-3-3epsilon;14-3-3zeta;18w;a;Abi;Abl;Abp1;Act42A;Act5C;Actn;Ada2b;Ady43A;ago;AGO1;AGO2;Akap200;Akt1;Aldh-III;Alg-2;ALiX;alph;alpha-Est10;alpha-Est3;alpha-Est9;alphaSnap;alphaTub84B;AMPdeam;AnxB9;aop;AP-1gamma;AP-1mu;Apc;aph-1;aPKC;apt;Arf51F;Arf79F;Argk;Arp1;Arp2;Arp3;Arpc1;Arpc2;Arpc4;Arpc5;aru;ASPP;Atet;Atf3;Atf6;Atg1;Atg4a;Atpalpha;B4;babos;Baldspot;barc;bark;baz;bbg;bdg;beat-IIIc;Best1;beta…
5kbUpTx	Jra_w001	cisbp__M4565	5.04	0.0485	Jra	*	kay (inferredBy_Orthology).	Jra (inferredBy_MotifSimilarity).	835	3262	14-3-3epsilon;14-3-3zeta;18w;a;Abl;Abp1;Act42A;Act5C;Actn;Ada2b;Ady43A;ago;AGO1;AGO2;Akap200;Akt1;ALiX;alph;alpha-Est3;alpha-Est9;alpha-Spec;alphaTub84B;AnxB9;aop;AP-1gamma;AP-1mu;aph-1;apt;Arf51F;Arf79F;Argk;Arp1;Arp2;Arp3;Arpc1;Arpc2;aru;ASPP;Atf3;Atf6;Atg1;Atg4a;Atpalpha;B4;babos;barc;bark;baz;bbg;beat-IIIc;Best1;beta-Spec;betaTub60D;betaTub97EF;bif;blow;bru2;Bsg;Btk29A;btsz;bun;by;cact;CAH2;C…
5kbUpTx	Jra_w001	yetfasco__YER064C_2094	5.03	0.0485	Jra	*		Jra; kay (inferredBy_MotifSimilarity). cnc (inferredBy_MotifSimilarity_n_Orthology).	809	3090	14-3-3epsilon;14-3-3zeta;18w;a;Abl;Abp1;Act42A;Act5C;Actn;Ady43A;ago;AGO1;AGO2;Akap200;Akt1;Aldh-III;ALiX;alph;alpha-Est9;alphaTub84B;AMPdeam;AnxB9;aop;AP-1gamma;AP-1mu;aph-1;aPKC;apt;Arf51F;Arf79F;Argk;Arp1;Arp2;Arp3;Arpc1;Arpc2;Arpc4;Asap;Atf3;Atg1;Atg4a;atl;Atpalpha;B4;babos;barc;bark;baz;bbg;beat-IIIc;Best1;beta-Spec;betaggt-I;betaTub60D;betaTub97EF;bif;bip1;blow;bru2;Bsg;Btk29A;bun;by;C3G;ca…
5kbUpTx	Jra_w001	homer__DATGASTCAT_BATF	5.02	0.0484	Jra	*		Jra; kay (inferredBy_MotifSimilarity). NFAT (inferredBy_MotifSimilarity_n_Orthology).	1045	4579	14-3-3epsilon;14-3-3zeta;18w;a;Abi;Abl;Abp1;Acsl;Act42A;Act5C;Actn;Ada2b;Adk1;Ady43A;ago;AGO1;AGO2;AhcyL1;Akap200;Akt1;Aldh-III;Alg-2;ALiX;alph;alpha-Est10;alpha-Est3;alpha-Est7;alpha-Est9;alpha-Man-IIb;alphaTub84B;AMPdeam;AnxB9;aop;AP-1gamma;AP-1mu;Apc;aph-1;aPKC;apt;Arf51F;Arf79F;Argk;Arp1;Arp2;Arp3;Arpc1;Arpc2;Arpc4;Arpc5;aru;Asap;ASPP;Atf3;Atg1;Atg17;Atg18a;Atg4a;Atg8a;atl;Atpalpha;ATPCL;B4;b…
5kbUpTx	Jra_w001	hocomoco__FOSL1_MOUSE.H10MO.C	5.01	0.0484	Jra	*	kay (inferredBy_Orthology).	Jra (inferredBy_MotifSimilarity). mor (inferredBy_MotifSimilarity_n_Orthology).	1019	4249	14-3-3epsilon;14-3-3zeta;18w;a;Abi;Abl;Abp1;Act42A;Act5C;Actn;Ada2b;AdipoR;Ady43A;ago;AGO1;AGO2;AhcyL1;Akap200;Akt1;Alg-2;ALiX;alph;alpha-Est10;alpha-Est3;alpha-Est9;alphaSnap;alphaTub84B;AnxB9;aop;AP-1gamma;AP-1mu;aph-1;aPKC;apt;Arf51F;Arf79F;Argk;Arp1;Arp2;Arp3;Arpc1;Arpc2;Arpc4;Arpc5;aru;ASPP;Atf3;Atg1;Atg17;Atg4a;atl;Atpalpha;B4;babos;Baldspot;barc;bark;baz;bbg;beat-IIIc;Best1;beta-Spec;betag…
5kbUpTx	Jra_w001	hocomoco__JUND_HUMAN.H10MO.A	5	0.0484	Jra	**	Jra (inferredBy_Orthology).	kay (inferredBy_MotifSimilarity). cnc (inferredBy_MotifSimilarity_n_Orthology).	971	4039	14-3-3epsilon;14-3-3zeta;18w;a;aay;Abl;Abp1;Acsl;Act42A;Act5C;Actn;Ada2b;Ady43A;ago;AGO1;AGO2;AhcyL1;Akap200;Akt1;Aldh-III;ALiX;alph;alpha-Est10;alpha-Est3;alpha-Est9;alpha-Man-IIb;alphaSnap;alphaTub84B;AnxB11;AnxB9;aop;AP-1gamma;AP-1mu;Apc;aph-1;aPKC;apt;Arf51F;Arf79F;Argk;Arp1;Arp2;Arp3;Arpc1;Arpc2;Arpc4;Arpc5;aru;ASPP;Atf3;Atf6;Atg1;Atg17;Atg4a;atl;Atpalpha;B4;babos;Baldspot;barc;bark;baz;bbg;…
5kbUpTx	Jra_w001	taipale__NFE2_DBD_NATGASTCATN	4.99	0.0483	Jra	*	cnc (inferredBy_Orthology).	Jra; kay (inferredBy_MotifSimilarity_n_Orthology).	1085	4781	14-3-3epsilon;14-3-3zeta;18w;a;Abl;Abp1;Acsl;Actn;Ada2b;Adar;AdipoR;Adk1;ago;AGO2;Akap200;Aldh-III;Alg-2;ALiX;alph;alpha-Est3;alpha-Est9;alpha-Man-IIb;alphaSnap;alphaTub84B;AMPdeam;Ank;AnxB11;AnxB9;aop;AP-1gamma;AP-1mu;AP-1sigma;aPKC;apt;Arc1;Arc2;Arf51F;Arf79F;Argk;Arp1;Arp2;Arp3;Arpc1;Arpc2;Arpc5;Asap;Asph;ASPP;Atet;Atf3;Atf6;Atg1;Atg17;Atg18a;Atg4a;Atpalpha;B4;babos;Baldspot;barc;bark;baz;bbg;…
5kbUpTx	Jra_w001	jaspar__MA0489.1	4.96	0.0482	Jra	**	Jra (inferredBy_Orthology).	kay (inferredBy_MotifSimilarity). NFAT; mor (inferredBy_MotifSimilarity_n_Orthology).	1081	4628	14-3-3epsilon;14-3-3zeta;18w;a;Abi;Abl;Abp1;Acsl;Act42A;Act5C;Actn;Ada2b;Adar;Adk1;Ady43A;ago;AGO1;AGO2;AhcyL1;Akap200;Akt1;Alg-2;ALiX;alph;alpha-Est10;alpha-Est3;alpha-Est7;alpha-Est9;alpha-Man-IIb;alphaTub84B;AnxB11;AnxB9;aop;AP-1gamma;AP-1mu;aph-1;aPKC;Aps;apt;Arc2;Arf51F;Arf79F;Argk;Arp1;Arp2;Arp3;Arpc1;Arpc2;Arpc4;Arpc5;aru;Asap;Asph;ASPP;Atet;Atf3;Atf6;Atg1;Atg17;Atg18a;Atg4a;Atg9;atl;Atpal…
5kbUpTx	Jra_w001	jaspar__MA0476.1	4.92	0.0479	Jra	*	kay (inferredBy_Orthology).	Jra (inferredBy_MotifSimilarity_n_Orthology).	1001	4040	14-3-3epsilon;14-3-3zeta;18w;a;Abi;Abl;Abp1;Act42A;Act5C;Actn;Ada2b;Adar;Adk1;Ady43A;ago;AGO1;AGO2;AhcyL1;Akap200;Akt1;Aldh-III;Alg-2;ALiX;alph;alpha-Est10;alpha-Est3;alpha-Est7;alpha-Est9;alphaSnap;alphaTub84B;AMPdeam;AnxB9;aop;AP-1gamma;AP-1mu;Apc;aph-1;aPKC;apt;Arf79F;Argk;Arp1;Arp2;Arp3;Arpc1;Arpc2;Arpc4;Arpc5;aru;Asap;Atf3;Atg1;Atg17;Atg4a;atl;Atpalpha;ATPCL;B4;babos;Baldspot;barc;bark;baz;b…
5kbUpTx	Jra_w001	hocomoco__FOSB_HUMAN.H10MO.C	4.91	0.0479	Jra	*	kay (inferredBy_Orthology).	Jra (inferredBy_MotifSimilarity). cnc; mor (inferredBy_MotifSimilarity_n_Orthology).	1122	4946	14-3-3epsilon;14-3-3zeta;18w;a;Abi;Abl;Abp1;Acsl;Act42A;Act5C;Actn;Ada2b;AdipoR;Ady43A;ago;AGO1;AGO2;AhcyL1;Akap200;Akt1;Aldh-III;Alg-2;ALiX;alph;alpha-Est10;alpha-Est3;alpha-Est7;alpha-Est9;alpha-Man-IIb;alphaSnap;alphaTub84B;AMPdeam;AnxB9;aop;AP-1gamma;AP-1mu;AP-1sigma;Apc;aph-1;aPKC;apt;Arc2;Arf51F;Arf79F;Argk;Arp1;Arp2;Arp3;Arpc1;Arpc2;Arpc4;Arpc5;aru;Asap;Asph;ASPP;Atf3;Atf6;Atg1;Atg17;Atg4a…
5kbUpTx	Jra_w001	homer__DATGASTCATHN_Atf3	4.9	0.0479	Jra	*		Jra; kay (inferredBy_MotifSimilarity).	875	3398	14-3-3epsilon;14-3-3zeta;18w;a;Abl;Abp1;Act42A;Act5C;Actn;Ada2b;Ady43A;ago;AGO1;AGO2;Akap200;Akt1;ALiX;alph;alpha-Est10;alpha-Est3;alpha-Est9;alphaTub84B;AnxB9;aop;AP-1mu;Apc;aph-1;aPKC;apt;Arf79F;Argk;Arp1;Arp2;Arp3;Arpc1;Arpc2;Arpc4;aru;ASPP;Atf3;Atg1;Atg17;Atg4a;Atpalpha;B4;babos;Baldspot;barc;bark;baz;bbg;beat-IIIc;Best1;beta-Spec;betaggt-I;betaTub60D;betaTub97EF;bif;blow;bru2;Bsg;Btk29A;btsz…
5kbUpTx	Jra_w001	swissregulon__sacCer__GCN4	4.9	0.0479	Jra	*		Jra; kay (inferredBy_MotifSimilarity). NFAT; cnc (inferredBy_MotifSimilarity_n_Orthology).	729	2750	14-3-3epsilon;14-3-3zeta;18w;a;Abi;Abl;Abp1;Act5C;Actn;Ady43A;AGO1;AGO2;Akap200;ALiX;alpha-Est9;alpha-Man-IIb;alphaTub84B;AnxB9;aop;AP-1mu;aph-1;aPKC;apt;Arf51F;Argk;Arp1;Arp2;Arp3;Arpc1;Arpc2;Asap;Atf3;Atg17;Atg4a;Atg8a;Atpalpha;B4;babos;barc;bark;baz;bbg;bdg;beat-IIIc;Best1;betaTub60D;bif;blow;Bmcp;bru2;Bsg;Btk29A;btsz;bun;bves;by;cact;CAH2;Cam;CAP;Caper;capt;CdGAPr;CenG1A;cer;cert;Cf2;CG10055;…
5kbUpTx	Jra_w001	hocomoco__FOS_HUMAN.H10MO.A	4.9	0.0478	Jra	*	kay (inferredBy_Orthology).	Jra (inferredBy_MotifSimilarity). cnc; mor (inferredBy_MotifSimilarity_n_Orthology).	1045	4414	14-3-3epsilon;14-3-3zeta;18w;a;Abl;Abp1;Act42A;Act5C;Actn;Ada2b;Ady43A;ago;AGO1;AGO2;AhcyL1;Akap200;Akt1;Aldh-III;ALiX;alph;alpha-Est10;alpha-Est3;alpha-Est7;alpha-Est9;alpha-Man-IIb;alpha-Spec;alphaSnap;alphaTub84B;AMPdeam;AnxB9;aop;AP-1gamma;AP-1mu;Apc;aph-1;aPKC;Aps;apt;Arc2;Arf51F;Arf79F;Argk;Arp1;Arp2;Arp3;Arpc1;Arpc2;Arpc4;Arpc5;aru;Asap;ASPP;Atf3;Atf6;Atg1;Atg17;Atg18a;Atg4a;Atg8a;Atg9;atl…
5kbUpTx	Jra_w001	cisbp__M5659	4.88	0.0477	Jra	*	cnc (inferredBy_Orthology).	Jra; kay (inferredBy_MotifSimilarity_n_Orthology).	1078	4965	14-3-3epsilon;14-3-3zeta;18w;a;Abl;Abp1;Acsl;Act42A;Actn;Ada2b;AdipoR;Adk1;Ady43A;ago;AGO1;AGO2;AhcyL1;Akap200;Aldh-III;Alg-2;ALiX;alph;alpha-Est3;alpha-Est7;alpha-Est9;alpha-Man-IIb;alphaSnap;alphaTub84B;AMPdeam;Ank;AnxB10;AnxB11;AnxB9;aop;AP-1gamma;AP-1mu;aph-1;aPKC;Aps;apt;Arc2;Arf51F;Arf79F;Argk;Arp1;Arp2;Arp3;Arpc1;Arpc2;Arpc5;Asap;Asph;ASPP;Atet;Atf3;Atf6;Atg1;Atg17;Atg18a;Atg4a;Atpalpha;B4…
5kbUpTx	Jra_w001	transfac_pro__M04693	4.87	0.0477	Jra	*	kay (inferredBy_Orthology).	Jra (inferredBy_MotifSimilarity). NFAT; cnc (inferredBy_MotifSimilarity_n_Orthology).	742	2774	14-3-3epsilon;14-3-3zeta;18w;a;Abl;Abp1;Actn;AGO1;AGO2;Akap200;Alg-2;ALiX;alph;alpha-Est9;alphaTub84B;AnxB9;aop;AP-1mu;aPKC;apt;Arf79F;Argk;Arp3;Arpc1;Arpc2;Arpc4;Arpc5;ASPP;Atf3;Atg1;Atpalpha;B4;babos;barc;bark;baz;bbg;beat-IIIc;Best1;beta-Spec;betaTub60D;bif;blow;bru2;Bsg;Btk29A;bun;bves;by;cact;CalpB;Cam;CanA-14F;CAP;Caper;capt;Cbl;CdGAPr;cdi;CenG1A;cert;Cf2;CG10055;CG10062;CG10082;CG10098;CG1…
5kbUpTx	Jra_w001	cisbp__M2290	4.86	0.0476	Jra	**	Jra (inferredBy_Orthology).	kay (inferredBy_MotifSimilarity). NFAT; mor (inferredBy_MotifSimilarity_n_Orthology).	1108	4977	14-3-3epsilon;14-3-3zeta;18w;a;Abi;Abl;Abp1;Acsl;Act42A;Act5C;Actn;Ada2b;Adar;Ady43A;ago;AGO1;AGO2;AhcyL1;Akap200;Akt1;Alg-2;ALiX;alph;alpha-Est10;alpha-Est3;alpha-Est7;alpha-Est9;alpha-Man-IIb;alphaTub84B;AnxB11;AnxB9;aop;AP-1gamma;AP-1mu;AP-2alpha;Apc;aph-1;aPKC;apt;Arc2;Arf51F;Arf79F;Argk;Arp1;Arp2;Arp3;Arpc1;Arpc2;Arpc4;Arpc5;aru;Asap;Asph;ASPP;Atf3;Atf6;Atg1;Atg17;Atg18a;Atg4a;Atg9;atl;Atpal…
5kbUpTx	Jra_w001	cisbp__M6318	4.85	0.0476	Jra	**	Jra (inferredBy_Orthology).	kay (inferredBy_MotifSimilarity). cnc (inferredBy_MotifSimilarity_n_Orthology).	929	3812	14-3-3epsilon;14-3-3zeta;18w;a;aay;Abl;Abp1;Acsl;Act42A;Act5C;Actn;Ada2b;Ady43A;ago;AGO1;AGO2;Akap200;Akt1;Aldh-III;ALiX;alph;alpha-Est10;alpha-Est3;alpha-Est9;alphaSnap;alphaTub84B;AnxB11;AnxB9;aop;AP-1gamma;AP-1mu;Apc;aph-1;aPKC;apt;Arf51F;Arf79F;Argk;Arp1;Arp2;Arp3;Arpc1;Arpc2;Arpc4;Arpc5;aru;ASPP;Atf3;Atf6;Atg1;Atg17;Atg4a;Atpalpha;B4;babos;Baldspot;barc;bark;baz;bbg;beat-IIIc;Best1;beta-Spec…
5kbUpTx	Jra_w001	cisbp__M4619	4.85	0.0476	Jra	*	kay (inferredBy_Orthology).	Jra (inferredBy_MotifSimilarity). mor (inferredBy_MotifSimilarity_n_Orthology).	981	4107	14-3-3zeta;18w;a;Abi;Abl;Abp1;Act42A;Act5C;Actn;Ada2b;AdipoR;Ady43A;ago;AGO1;AGO2;AhcyL1;Akap200;Akt1;Aldh-III;Alg-2;ALiX;alph;alpha-Est10;alpha-Est3;alpha-Est9;alpha-Man-IIb;alphaSnap;alphaTub84B;AMPdeam;AnxB10;AnxB9;aop;AP-1mu;aph-1;aPKC;apt;Arf51F;Arf79F;Argk;Arp3;Arpc1;Arpc2;Arpc4;aru;ASPP;Atf3;Atf6;Atg1;Atg17;Atg4a;atl;Atpalpha;B4;babos;Baldspot;barc;bark;baz;bbg;be;beat-IIIc;Best1;beta-Spec…
5kbUpTx	Jra_w001	homer__NNATGASTCATH_Fra1	4.84	0.0475	Jra	*		Jra; kay (inferredBy_MotifSimilarity). cnc; mor (inferredBy_MotifSimilarity_n_Orthology).	798	3101	14-3-3epsilon;14-3-3zeta;18w;a;Abl;Abp1;Act42A;Act5C;Actn;Ady43A;ago;AGO1;AGO2;Akap200;Akt1;ALiX;alph;alpha-Est10;alpha-Est9;alphaTub84B;AnxB9;aop;AP-1mu;Apc;aph-1;aPKC;apt;Arf51F;Argk;Arp1;Arp2;Arp3;Arpc1;Arpc2;Atf3;Atg1;Atg17;atl;Atpalpha;B4;babos;Baldspot;barc;bark;baz;bbg;bdg;beat-IIIc;Best1;betaggt-I;betaTub60D;betaTub97EF;bif;blow;bru2;Bsg;Btk29A;btsz;bun;bves;by;cact;CAH2;CalpB;Cam;CAP;Cap…
5kbUpTx	Jra_w001	cisbp__M4608	4.84	0.0475	Jra	**	Jra (inferredBy_Orthology).	kay (inferredBy_MotifSimilarity). cnc (inferredBy_MotifSimilarity_n_Orthology).	936	3772	14-3-3epsilon;14-3-3zeta;18w;a;Abi;Abl;Abp1;Act42A;Act5C;Actn;Ada2b;Ady43A;ago;AGO1;AGO2;Akap200;Akt1;Aldh-III;ALiX;alph;alpha-Est10;alpha-Est3;alpha-Est7;alpha-Est9;alphaTub84B;AnxB9;aop;AP-1gamma;AP-1mu;aph-1;apt;Arf51F;Arf79F;Argk;Arp1;Arp3;Arpc1;Arpc2;Arpc4;Arpc5;aru;Asap;Atf3;Atf6;Atg1;Atg17;Atg4a;atl;Atpalpha;ATPCL;B4;babos;barc;bark;baz;bbg;beat-IIIc;Best1;beta-Spec;betaggt-I;betaTub60D;be…
5kbUpTx	Jra_w001	hocomoco__FOSL2_HUMAN.H10MO.A	4.84	0.0475	Jra	*	kay (inferredBy_Orthology).	Jra; cnc; mor (inferredBy_MotifSimilarity_n_Orthology).	858	3335	14-3-3epsilon;14-3-3zeta;18w;a;Abl;Act42A;Act5C;Actn;Ada2b;Ady43A;ago;AGO2;Akap200;Akt1;Aldh-III;ALiX;alph;alpha-Est10;alpha-Est3;alpha-Est9;alphaTub84B;AnxB9;aop;AP-1gamma;AP-1mu;aph-1;aPKC;apt;Arf79F;Argk;Arp1;Arp2;Arp3;Arpc1;Arpc2;Arpc4;Arpc5;aru;Asap;ASPP;Atf3;Atg1;Atg17;Atg4a;atl;Atpalpha;B4;babos;Baldspot;barc;bark;baz;bbg;beat-IIIc;Best1;beta-Spec;betaggt-I;betaTub60D;betaTub97EF;bif;blow;…
5kbUpTx	Jra_w001	cisbp__M2278	4.83	0.0475	Jra	*	kay (inferredBy_Orthology).	Jra (inferredBy_MotifSimilarity_n_Orthology).	953	3874	14-3-3zeta;18w;a;Abl;Abp1;Act42A;Act5C;Actn;Ada2b;Ady43A;ago;AGO1;AGO2;AhcyL1;Akap200;Akt1;Aldh-III;Alg-2;ALiX;alph;alpha-Est10;alpha-Est3;alpha-Est7;alpha-Est9;alphaSnap;alphaTub84B;AMPdeam;AnxB9;aop;AP-1gamma;AP-1mu;Apc;aph-1;aPKC;apt;Arf79F;Argk;Arp2;Arp3;Arpc1;Arpc2;Arpc4;Arpc5;aru;Asap;Atf3;Atg1;Atg17;Atg4a;Atpalpha;ATPCL;B4;babos;Baldspot;barc;bark;baz;bbg;beat-IIIc;Best1;beta-Spec;betaggt-…
5kbUpTx	Jra_w001	cisbp__M4531	4.83	0.0475	Jra	**	Jra (inferredBy_Orthology).	kay (inferredBy_MotifSimilarity).	1010	4256	14-3-3epsilon;14-3-3zeta;18w;a;Abl;Abp1;Acsl;Act42A;Act5C;Actn;Ada2b;AdipoR;Ady43A;ago;AGO1;AGO2;Akap200;Akt1;Aldh-III;Alg-2;ALiX;alph;alpha-Est10;alpha-Est3;alpha-Est7;alpha-Est9;alpha-Man-IIb;alphaSnap;alphaTub84B;AnxB11;AnxB9;aop;AP-1gamma;AP-1mu;Apc;aph-1;aPKC;apt;Arf51F;Arf79F;Argk;Arp1;Arp3;Arpc1;Arpc2;Arpc4;Arpc5;Asap;Asph;ASPP;Atet;Atf3;Atf6;Atg1;Atg17;Atg4a;atl;Atpalpha;ATPCL;B4;babos;ba…
5kbUpTx	Jra_w001	cisbp__M4541	4.81	0.0474	Jra	**	Jra (inferredBy_Orthology).	kay (inferredBy_MotifSimilarity).	1084	4959	14-3-3epsilon;14-3-3zeta;18w;a;aay;Abi;Abl;Acsl;Act42A;Act5C;Actn;Ada2b;Adar;AdipoR;Adk1;Ady43A;Afti;ago;AGO1;AGO2;Akap200;Aldh-III;Alg-2;ALiX;alph;alpha-Est3;alpha-Est7;alpha-Est9;alpha-Man-IIb;alphaSnap;alphaTub84B;AMPdeam;AnxB10;AnxB11;AnxB9;aop;AP-1mu;Apc;aph-1;aPKC;Aps;apt;Arc2;Arf51F;Arf79F;Argk;Arp1;Arp2;Arp3;Arpc1;Arpc2;Arpc4;Arpc5;Asap;ASPP;Atet;Atf3;Atf6;Atg1;Atg17;Atg18a;Atg4a;Atg8a;at…
5kbUpTx	Jra_w001	swissregulon__hs__FOS_FOS_B_L1__JUN_B_D_.p2	4.77	0.0472	Jra	**	Jra; kay (inferredBy_Orthology).	mor (inferredBy_MotifSimilarity_n_Orthology).	1073	4713	14-3-3epsilon;14-3-3zeta;18w;a;Abi;Abl;Abp1;Act42A;Act5C;Actn;Ada2b;Adar;AdipoR;Ady43A;ago;AGO1;AGO2;AhcyL1;Akap200;Akt1;Aldh-III;Alg-2;ALiX;alph;alpha-Est10;alpha-Est3;alpha-Est7;alpha-Est9;alpha-Man-IIb;alphaSnap;alphaTub84B;AMPdeam;AnxB9;aop;AP-1gamma;AP-1mu;Apc;aph-1;aPKC;apt;Arf79F;Argk;Arp1;Arp2;Arp3;Arpc1;Arpc2;Arpc4;Arpc5;aru;ASPP;Atf3;Atg1;Atg17;atl;Atpalpha;B4;babos;Baldspot;barc;bark;b…
5kbUpTx	Jra_w001	homer__GATGACTCATCN_Jun-AP1	4.76	0.0471	Jra	**	Jra (inferredBy_Orthology).	kay (inferredBy_MotifSimilarity). cnc; mor (inferredBy_MotifSimilarity_n_Orthology).	1040	4451	14-3-3epsilon;14-3-3zeta;18w;a;Abl;Abp1;Acsl;Act42A;Act5C;Actn;Ada2b;Adk1;Ady43A;ago;AGO1;AGO2;AhcyL1;Akap200;Akt1;Aldh-III;Alg-2;ALiX;alph;alpha-Est10;alpha-Est3;alpha-Est9;alpha-Man-IIb;alphaSnap;alphaTub84B;AMPdeam;AnxB11;AnxB9;aop;AP-1gamma;AP-1mu;Apc;aph-1;aPKC;apt;Arf51F;Arf79F;Argk;Arp1;Arp2;Arp3;Arpc1;Arpc2;Arpc4;Arpc5;aru;ASPP;Atf3;Atf6;Atg1;Atg17;Atg4a;atl;Atpalpha;B4;babos;Baldspot;bar…
5kbUpTx	Jra_w001	cisbp__M4590	4.71	0.0468	Jra	*	kay (inferredBy_Orthology).	Jra; mor (inferredBy_MotifSimilarity_n_Orthology).	972	4145	14-3-3epsilon;14-3-3zeta;18w;a;Abi;Abl;Abp1;Act42A;Act5C;Actn;Ada2b;AdipoR;Ady43A;ago;AGO1;AGO2;AhcyL1;Akap200;Akt1;Aldh-III;Alg-2;ALiX;alph;alpha-Est10;alpha-Est3;alpha-Est9;alpha-Man-IIb;alphaTub84B;AMPdeam;AnxB9;aop;AP-1mu;Apc;aph-1;aPKC;apt;Arf79F;Argk;Arp2;Arp3;Arpc1;Arpc2;Arpc4;Arpc5;aru;Asph;ASPP;Atf3;Atf6;Atg1;Atg17;Atg4a;atl;Atpalpha;ATPCL;B4;babos;Baldspot;barc;bark;baz;bbg;be;beat-IIIc…
5kbUpTx	Jra_w001	cisbp__M5050	4.7	0.0468	Jra	**	Jra (directAnnotation).	kay (inferredBy_MotifSimilarity).	934	3793	14-3-3epsilon;14-3-3zeta;18w;a;Abi;Abl;Abp1;Act42A;Act5C;Actn;Ada2b;Adgf-A;Ady43A;ago;AGO1;AGO2;Akap200;Akt1;Aldh-III;ALiX;alph;alpha-Est7;alpha-Est9;alpha-Man-IIb;alphaTub84B;AMPdeam;AnxB11;AnxB9;aop;AP-1gamma;AP-1mu;Apc;aph-1;aPKC;apt;Arf51F;Arf79F;Argk;Arp1;Arp2;Arp3;Arpc1;Arpc2;Arpc5;Asap;ASPP;Atf3;Atg1;Atg17;Atpalpha;ATPCL;B4;babos;Baldspot;barc;bark;baz;bbg;bdg;beat-IIIc;Best1;beta-Spec;bet…
5kbUpTx	Jra_w001	taipale__JDP2_full_ATGASTCAT	4.7	0.0468	Jra	*		kay (inferredBy_MotifSimilarity). Jra; cnc (inferredBy_MotifSimilarity_n_Orthology).	1081	4767	14-3-3epsilon;14-3-3zeta;18w;a;Abi;Abl;Abp1;Acsl;Act42A;Actn;Ada2b;Adgf-A;AdipoR;ago;AGO1;AGO2;Akap200;Aldh-III;Alg-2;ALiX;alph;alpha-Est3;alpha-Est7;alpha-Est9;alpha-Man-IIb;alphaSnap;alphaTub84B;AMPdeam;AnxB11;AnxB9;aop;AP-1gamma;AP-1mu;aph-1;aPKC;apt;Arc2;Arf51F;Arf79F;Argk;Arp1;Arp2;Arp3;Arpc1;Arpc2;Arpc4;Arpc5;Asap;ASPP;Atet;Atf3;Atf6;Atg1;Atg17;Atg18a;Atg4a;Atg8a;Atpalpha;B4;babos;Baldspot;…
5kbUpTx	Jra_w001	flyfactorsurvey__kay_Jra_SANGER_5_FBgn0001291	4.69	0.0468	Jra	**	Jra (directAnnotation).	kay (inferredBy_MotifSimilarity).	925	3763	14-3-3epsilon;14-3-3zeta;18w;a;Abi;Abl;Abp1;Act42A;Act5C;Actn;Ada2b;Adgf-A;Ady43A;ago;AGO1;AGO2;Akap200;Akt1;Aldh-III;ALiX;alph;alpha-Est7;alpha-Est9;alphaTub84B;AMPdeam;AnxB11;AnxB9;aop;AP-1gamma;AP-1mu;Apc;aph-1;aPKC;apt;Arf51F;Arf79F;Argk;Arp1;Arp2;Arp3;Arpc1;Arpc2;Arpc5;Asap;ASPP;Atf3;Atg1;Atg17;atl;Atpalpha;ATPCL;B4;babos;Baldspot;barc;bark;baz;bbg;bdg;beat-IIIc;Best1;beta-Spec;betaggt-I;bet…
5kbUpTx	Jra_w001	factorbook__AP1	4.68	0.0467	Jra	**	Jra; kay (inferredBy_Orthology).	mor (inferredBy_MotifSimilarity_n_Orthology).	939	3862	14-3-3epsilon;14-3-3zeta;18w;a;Abi;Abl;Abp1;Act42A;Act5C;Actn;Ada2b;Adk1;Ady43A;ago;AGO1;AGO2;AhcyL1;Akap200;Akt1;Aldh-III;Alg-2;ALiX;alph;alpha-Est10;alpha-Est3;alpha-Est7;alpha-Est9;alpha-Man-IIb;alphaTub84B;AnxB9;aop;AP-1gamma;AP-1mu;Apc;aph-1;aPKC;apt;Arf51F;Arf79F;Argk;Arp1;Arp2;Arp3;Arpc1;Arpc2;Arpc4;Arpc5;aru;Atf3;Atg1;Atg17;Atg4a;atl;Atpalpha;B4;babos;Baldspot;barc;bark;baz;bbg;be;beat-II…
5kbUpTx	Jra_w001	taipale__JDP2_DBD_ATGASTCAT	4.66	0.0466	Jra	*		Jra; kay (inferredBy_MotifSimilarity). cnc (inferredBy_MotifSimilarity_n_Orthology).	1077	4926	14-3-3epsilon;14-3-3zeta;18w;a;aay;Abi;Abl;Abp1;Act42A;Actn;Ada2b;Adgf-A;AdipoR;ago;AGO1;AGO2;Akap200;Akt1;Aldh-III;Alg-2;ALiX;alph;alpha-Est3;alpha-Est7;alpha-Est9;alpha-Man-IIb;alphaSnap;alphaTub84B;AMPdeam;AnxB9;aop;AP-1gamma;AP-1mu;Apc;aph-1;aPKC;apt;Arc2;Arf51F;Arf79F;Argk;Arp1;Arp2;Arp3;Arpc1;Arpc2;Arpc4;Arpc5;Asap;ASPP;Atet;Atf3;Atf6;Atg1;Atg17;Atg18a;Atg4a;Atg8a;Atpalpha;B4;babos;Baldspot…
5kbUpTx	Jra_w001	cisbp__M4506	4.64	0.0465	Jra	**	Jra (inferredBy_Orthology).	kay (inferredBy_MotifSimilarity). cnc; mor (inferredBy_MotifSimilarity_n_Orthology).	938	3907	14-3-3epsilon;14-3-3zeta;18w;a;Abi;Abl;Abp1;Act42A;Act5C;Actn;Ada2b;Ady43A;ago;AGO1;AGO2;AhcyL1;Akap200;Akt1;Aldh-III;Alg-2;ALiX;alph;alpha-Est10;alpha-Est3;alpha-Est9;alpha-Man-IIb;alphaTub84B;AMPdeam;AnxB10;AnxB9;aop;AP-1gamma;AP-1mu;aph-1;apt;Arf51F;Arf79F;Argk;Arp2;Arp3;Arpc1;Arpc2;aru;Atf3;Atf6;Atg1;Atg4a;atl;Atpalpha;B4;babos;Baldspot;barc;bark;baz;bbg;be;beat-IIIc;Best1;beta-Spec;betaTub60…
5kbUpTx	Jra_w001	cisbp__M5589	4.6	0.0463	Jra	*		kay (inferredBy_MotifSimilarity). Jra; cnc (inferredBy_MotifSimilarity_n_Orthology).	975	4315	14-3-3epsilon;14-3-3zeta;18w;a;Abi;Abl;Abp1;Actn;Ada2b;Adgf-A;AdipoR;ago;AGO2;Akap200;Aldh-III;ALiX;alph;alpha-Est7;alpha-Est9;alpha-Man-IIb;alphaSnap;alphaTub84B;AnxB11;AnxB9;aop;AP-1gamma;AP-1mu;aph-1;aPKC;apt;Arf51F;Argk;Arp1;Arp3;Arpc1;Arpc2;Arpc4;Arpc5;Asap;ASPP;Atet;Atf3;Atf6;Atg1;Atg17;Atg18a;Atg4a;Atg8a;Atpalpha;B4;babos;baf;Baldspot;barc;bark;baz;bbg;bdg;beat-IIIc;Best1;beta-Spec;betaTub…
5kbUpTx	Jra_w001	yetfasco__YIL056W_2091	4.58	0.0462	Jra	*		Jra; kay (inferredBy_MotifSimilarity). cnc; mor (inferredBy_MotifSimilarity_n_Orthology).	616	2194	14-3-3zeta;18w;a;Abl;Abp1;Act42A;Actn;Ady43A;ago;AGO2;Akap200;Aldh-III;ALiX;alpha-Est9;alphaTub84B;aop;AP-1mu;apt;Arf79F;Argk;Arp3;Arpc1;Arpc2;Atf3;Atg1;Atpalpha;B4;babos;barc;bark;baz;bbg;beat-IIIc;Best1;betaTub60D;betaTub97EF;bif;bip1;blow;bru2;Bsg;Btk29A;bun;by;cact;Cam;CAP;Caper;capt;cdc14;CdGAPr;cdi;CenG1A;cer;cert;Cf2;CG10055;CG10098;CG10126;CG10283;CG10337;CG10383;CG10527;CG10795;CG10979;C…
5kbUpTx	Jra_w001	taipale__Jdp2_DBD_ATGASTCAT_repr	4.56	0.0461	Jra	*		kay (inferredBy_MotifSimilarity). Jra; cnc (inferredBy_MotifSimilarity_n_Orthology).	1107	4951	14-3-3epsilon;14-3-3zeta;18w;a;Abi;Abl;Abp1;Act42A;Act5C;Actn;Ada2b;Adar;Adgf-A;AdipoR;Adk1;Ady43A;ago;AGO1;AGO2;Akap200;Akt1;Aldh-III;Alg-2;ALiX;alph;alpha-Est3;alpha-Est7;alpha-Est9;alpha-Man-IIb;alphaSnap;alphaTub84B;AMPdeam;Ank;AnxB11;AnxB9;aop;AP-1gamma;AP-1mu;aph-1;aPKC;Aps;apt;Arc2;Arf51F;Arf79F;Argk;Arp1;Arp2;Arp3;Arpc1;Arpc2;Arpc4;Arpc5;Asap;Asph;ASPP;Atet;Atf3;Atf6;Atg1;Atg17;Atg18a;Atg…
5kbUpTx	Jra_w001	cisbp__M5587	4.56	0.0461	Jra	*		Jra; kay (inferredBy_MotifSimilarity). cnc (inferredBy_MotifSimilarity_n_Orthology).	1021	4726	14-3-3epsilon;14-3-3zeta;18w;a;aay;Abi;Abl;Abp1;Act42A;Actn;Ada2b;Adgf-A;AdipoR;ago;AGO1;AGO2;Akap200;Akt1;Aldh-III;Alg-2;ALiX;alph;alpha-Est3;alpha-Est7;alpha-Est9;alpha-Man-IIb;alphaTub84B;AnxB9;aop;AP-1gamma;AP-1mu;Apc;aph-1;aPKC;apt;Arf51F;Arf79F;Argk;Arp1;Arp3;Arpc1;Arpc2;Arpc4;Arpc5;Asap;ASPP;Atet;Atf3;Atf6;Atg1;Atg17;Atg18a;Atg4a;Atg8a;Atpalpha;B4;babos;Baldspot;barc;bark;baz;bbg;bdg;be;be…
5kbUpTx	Jra_w001	cisbp__M0344	4.54	0.046	Jra	*		Jra; kay (inferredBy_MotifSimilarity_n_Orthology).	797	3127	14-3-3zeta;a;Abl;Abp1;Acsl;Act42A;Actn;Ada2b;Ady43A;AGO1;AGO2;Akap200;Akt1;alc;Aldh-III;ALiX;alpha-Est7;alpha-Est9;alpha-Spec;alphaTub84B;AnxB9;aop;AP-1mu;Apc;aph-1;aPKC;apt;Arf51F;Argk;Arp1;Arp3;Arpc1;Arpc2;Arpc4;Asap;ASPP;Atf3;Atg17;Atg8a;atl;Atpalpha;B4;babos;baf;Baldspot;barc;bark;baz;bbg;bdg;beat-IIIc;Best1;betaggt-I;betaTub60D;betaTub97EF;bif;blow;bru2;Bsg;Btk29A;btsz;bun;by;cact;CalpB;Cam;…
5kbUpTx	Jra_w001	cisbp__M4625	4.52	0.0459	Jra	**	Jra (inferredBy_Orthology).	kay (inferredBy_MotifSimilarity). mor (inferredBy_MotifSimilarity_n_Orthology).	569	1916	14-3-3epsilon;14-3-3zeta;18w;a;Abl;Act42A;Act5C;Actn;Ady43A;ago;AGO1;AGO2;Akap200;ALiX;alpha-Est9;alphaTub84B;AnxB9;aop;apt;Arf51F;Arf79F;Argk;Arp3;Arpc1;Arpc2;aru;Atf3;Atg1;Atpalpha;B4;babos;barc;bark;baz;bbg;beat-IIIc;Best1;betaTub60D;betaTub97EF;blow;bru2;Bsg;Btk29A;btsz;bun;by;cact;Cam;CAP;Caper;capt;CdGAPr;cdi;CenG1A;cert;Cf2;CG10098;CG10126;CG10283;CG10337;CG10376;CG10413;CG10527;CG10795;CG…
5kbUpTx	Jra_w001	jaspar__MA0477.1	4.52	0.0459	Jra	*	kay (inferredBy_Orthology).	Jra; mor (inferredBy_MotifSimilarity_n_Orthology).	1174	4962	14-3-3epsilon;14-3-3zeta;18w;a;Abi;Abl;Abp1;Act42A;Act5C;Actn;Ada2b;AdipoR;Ady43A;ago;AGO1;AGO2;AhcyL1;Akap200;Akt1;Aldh-III;Alg-2;ALiX;alph;alpha-Est10;alpha-Est3;alpha-Est9;alpha-Man-IIb;alphaSnap;alphaTub84B;AMPdeam;AnxB9;aop;AP-1gamma;AP-1mu;AP-1sigma;Apc;aph-1;aPKC;Aps;apt;Arc1;Arc2;Arf79F;Argk;Arp1;Arp2;Arp3;Arpc1;Arpc2;Arpc4;Arpc5;aru;Asph;ASPP;Atet;Atf3;Atf6;Atg1;Atg17;Atg18a;Atg4a;Atg8a;…
5kbUpTx	Jra_w001	hocomoco__JUN_HUMAN.H10MO.A	4.5	0.0458	Jra	**	Jra (inferredBy_Orthology).	kay (inferredBy_MotifSimilarity). cnc; mor (inferredBy_MotifSimilarity_n_Orthology).	876	3545	14-3-3epsilon;14-3-3zeta;18w;a;aay;Abl;Abp1;Acsl;Act42A;Act5C;Actn;Ada2b;Ady43A;AGO1;AGO2;Akap200;Akt1;Aldh-III;ALiX;alph;alpha-Est10;alpha-Est3;alpha-Est9;alphaTub84B;AnxB9;aop;AP-1mu;Apc;aph-1;aPKC;apt;Arf79F;Argk;Arp2;Arp3;Arpc1;Arpc2;Arpc4;Arpc5;aru;ASPP;Atf3;Atg1;atl;Atpalpha;B4;babos;barc;bark;baz;bbg;bdg;beat-IIIc;Best1;beta-Spec;betaggt-I;betaTub60D;betaTub97EF;bif;bip1;blow;bru2;Bsg;Btk2…
5kbUpTx	Jra_w001	jaspar__MA0303.1	4.49	0.0457	Jra	*		Jra; kay (inferredBy_MotifSimilarity_n_Orthology).	793	3250	14-3-3epsilon;14-3-3zeta;18w;a;Abi;Abl;Act42A;Act5C;Actn;Adgf-A;ago;AGO1;AGO2;Akap200;Alg-2;ALiX;alpha-Est7;alpha-Est9;alpha-Man-IIb;alphaTub84B;AnxB9;aop;AP-1mu;Apc;aph-1;aPKC;apt;Arf79F;Argk;Arp1;Arp2;Arp3;Arpc1;Arpc2;ASPP;Atf3;Atg1;Atg4a;Atg8a;atl;Atpalpha;B4;babos;barc;bark;baz;bbg;bdg;beat-IIIc;Best1;betaTub60D;betaTub97EF;bif;blow;Bmcp;bru2;Bsg;Btk29A;btsz;bun;by;C3G;cact;CAH2;CalpB;Cam;CAP…
5kbUpTx	Jra_w001	cisbp__M2279	4.49	0.0457	Jra	*	kay (inferredBy_Orthology).	Jra; mor (inferredBy_MotifSimilarity_n_Orthology).	942	3795	14-3-3zeta;18w;a;Abi;Abl;Abp1;Act42A;Act5C;Actn;Ada2b;Ady43A;ago;AGO1;AGO2;AhcyL1;Akap200;Akt1;Aldh-III;Alg-2;ALiX;alph;alpha-Est3;alpha-Est9;alphaTub84B;AnxB9;aop;AP-1gamma;AP-1mu;AP-1sigma;aph-1;aPKC;apt;Arf51F;Arf79F;Argk;Arp3;Arpc1;Arpc2;Arpc4;aru;ASPP;Atf3;Atg1;Atg4a;atl;Atpalpha;ATPCL;B4;babos;Baldspot;barc;bark;baz;bbg;be;beat-IIIc;Best1;beta-Spec;betaggt-I;betaTub60D;betaTub97EF;bif;blow;…
5kbUpTx	Jra_w001	cisbp__M2108	4.47	0.0456	Jra	*		Jra; kay (inferredBy_MotifSimilarity_n_Orthology).	848	3566	14-3-3epsilon;14-3-3zeta;18w;a;Abi;Abl;Act42A;Act5C;Actn;Acyp2;Adgf-A;Adk1;ago;AGO1;AGO2;Akap200;Akt1;Alg-2;ALiX;alph;alpha-Est3;alpha-Est7;alpha-Est9;alpha-Man-IIb;alphaTub84B;AnxB9;aop;AP-1mu;Apc;aph-1;aPKC;apt;Arf79F;Argk;Arp1;Arp2;Arp3;Arpc1;Arpc2;ASPP;Atf3;Atf6;Atg1;Atg18a;Atg4a;Atg8a;atl;Atpalpha;B4;babos;barc;bark;baz;bbg;bdg;beat-IIIc;Best1;betaggt-I;betaTub60D;betaTub97EF;bif;bip1;blow;B…
5kbUpTx	Jra_w001	cisbp__M6038	4.46	0.0456	Jra	*		kay (inferredBy_MotifSimilarity). Jra; cnc (inferredBy_MotifSimilarity_n_Orthology).	1045	4758	14-3-3epsilon;14-3-3zeta;18w;a;Abi;Abl;Abp1;Act42A;Act5C;Actn;Ada2b;Adar;Adgf-A;AdipoR;Adk1;ago;AGO1;AGO2;Akap200;Akt1;Aldh-III;ALiX;alph;alpha-Est3;alpha-Est7;alpha-Est9;alpha-Man-IIb;alphaSnap;alphaTub84B;AMPdeam;AnxB9;aop;AP-1gamma;AP-1mu;aph-1;aPKC;apt;Arf51F;Arf79F;Argk;Arp1;Arp2;Arp3;Arpc1;Arpc2;Arpc4;Arpc5;Asap;Asph;ASPP;Atet;Atf3;Atf6;Atg1;Atg17;Atg18a;Atg4a;Atg8a;Atpalpha;B4;babos;Baldsp…
5kbUpTx	Jra_w001	transfac_pro__M01555	4.44	0.0455	Jra	*		Jra; kay (inferredBy_MotifSimilarity_n_Orthology).	998	4539	14-3-3epsilon;14-3-3zeta;18w;a;Abi;Abl;Act42A;Act5C;Actn;Acyp2;Adgf-A;Adk1;Ady43A;ago;AGO1;AGO2;Akap200;Akt1;Aldh-III;Alg-2;ALiX;alph;alpha-Est10;alpha-Est3;alpha-Est7;alpha-Est9;alpha-Man-IIb;alpha-Spec;alphaSnap;alphaTub84B;AnxB10;AnxB9;aop;AP-1mu;Apc;aph-1;aPKC;apt;Arf79F;Argk;Arp1;Arp2;Arp3;Arpc1;Arpc2;Asap;ASPP;Atet;Atf3;Atf6;Atg1;Atg17;Atg18a;Atg4a;Atg8a;atl;Atpalpha;B4;babos;barc;bark;baz;…
5kbUpTx	Jra_w001	homer__ATGACTCATC_AP-1	4.43	0.0454	Jra	**	Jra (inferredBy_Orthology).	kay (inferredBy_MotifSimilarity). cnc; maf-S; mor (inferredBy_MotifSimilarity_n_Orthology).	886	3545	14-3-3epsilon;14-3-3zeta;18w;a;Abl;Abp1;Act42A;Act5C;Actn;Ada2b;Ady43A;ago;AGO1;AGO2;AhcyL1;Akap200;Akt1;Aldh-III;ALiX;alph;alpha-Est10;alpha-Est3;alpha-Est9;alphaTub84B;AnxB9;aop;AP-1gamma;AP-1mu;Apc;aph-1;aPKC;apt;Arf51F;Arf79F;Argk;Arp1;Arp2;Arp3;Arpc1;Arpc2;Arpc4;Arpc5;aru;ASPP;Atf3;Atg1;Atpalpha;B4;babos;Baldspot;barc;bark;baz;bbg;be;beat-IIIc;Best1;beta-Spec;betaggt-I;betaTub60D;betaTub97EF…
5kbUpTx	Jra_w001	cisbp__M4530	4.42	0.0453	Jra	*	kay (inferredBy_Orthology).	Jra (inferredBy_MotifSimilarity_n_Orthology).	963	3950	14-3-3epsilon;14-3-3zeta;18w;a;Abl;Abp1;Act42A;Act5C;Actn;Ada2b;Ady43A;ago;AGO1;AGO2;Akap200;Akt1;Aldh-III;Alg-2;ALiX;alph;alpha-Est10;alpha-Est3;alpha-Est7;alpha-Est9;alphaSnap;alphaTub84B;AMPdeam;AnxB10;AnxB9;aop;AP-1mu;aph-1;aPKC;apt;Arf79F;Argk;Arp1;Arp2;Arp3;Arpc1;Arpc2;Arpc4;aru;Atf3;Atg1;Atg17;Atg4a;atl;Atpalpha;B4;babos;Baldspot;barc;bark;baz;bbg;beat-IIIc;Best1;beta-Spec;betaggt-I;betaTu…
5kbUpTx	Jra_w001	cisbp__M6319	4.36	0.045	Jra	**	Jra (inferredBy_Orthology).	kay (inferredBy_MotifSimilarity). cnc; mor (inferredBy_MotifSimilarity_n_Orthology).	863	3478	14-3-3epsilon;14-3-3zeta;18w;a;aay;Abl;Abp1;Acsl;Act42A;Act5C;Actn;Ada2b;Ady43A;AGO1;AGO2;Akap200;Akt1;Aldh-III;ALiX;alph;alpha-Est10;alpha-Est3;alpha-Est9;alpha-Spec;alphaTub84B;AnxB9;aop;AP-1mu;Apc;aph-1;aPKC;apt;Arf79F;Argk;Arp2;Arp3;Arpc1;Arpc2;Arpc4;Arpc5;aru;ASPP;Atf3;Atg1;atl;Atpalpha;B4;babos;barc;bark;baz;bbg;bdg;beat-IIIc;Best1;beta-Spec;betaggt-I;betaTub60D;betaTub97EF;bif;bip1;blow;br…
5kbUpTx	Jra_w001	cisbp__M6230	4.3	0.0447	Jra	*	kay (inferredBy_Orthology).	Jra; cnc; mor (inferredBy_MotifSimilarity_n_Orthology).	817	3312	14-3-3epsilon;14-3-3zeta;18w;a;Abl;Act42A;Act5C;Actn;Ada2b;Ady43A;ago;AGO1;AGO2;Akap200;Aldh-III;ALiX;alph;alpha-Est10;alpha-Est3;alpha-Est9;alpha-Spec;alphaTub84B;AnxB10;AnxB9;aop;AP-1mu;Apc;aph-1;aPKC;apt;Arf51F;Arf79F;Argk;Arp3;Arpc1;Arpc2;Arpc4;aru;Atf3;Atg1;Atg17;Atg4a;Atpalpha;B4;babo;babos;barc;bark;baz;bbg;beat-IIIc;Best1;betaTub60D;betaTub97EF;bif;bip1;blow;bru2;Bsg;Btk29A;btsz;bun;bves;…
5kbUpTx	Jra_w001	yetfasco__YEL009C_1363	4.29	0.0447	Jra	*		Jra; kay (inferredBy_MotifSimilarity). NFAT; cnc; maf-S; tj (inferredBy_MotifSimilarity_n_Orthology).	684	2650	14-3-3zeta;18w;a;Abl;Abp1;Acsl;Act42A;Act5C;Actn;Ady43A;AGO1;AGO2;Akap200;Akt1;ALiX;alpha-Est9;alphaTub84B;AnxB9;aop;AP-1mu;aph-1;aPKC;apt;Arf51F;Arf79F;Argk;Arp1;Arp2;Arp3;Arpc1;Arpc2;ASPP;Atf3;Atg1;atl;Atpalpha;B4;babos;barc;bark;baz;bbg;beat-IIIc;Best1;betaggt-I;betaTub60D;betaTub97EF;bif;blow;bru2;Bsg;Btk29A;bun;by;cact;CalpA;Cam;CAP;Caper;capt;Cdc42;CdGAPr;cdi;CenB1A;CenG1A;cer;cert;Cf2;CG10…
5kbUpTx	Jra_w001	hocomoco__JUNB_HUMAN.H10MO.C	4.28	0.0447	Jra	**	Jra (inferredBy_Orthology).	cnc; kay; mor (inferredBy_MotifSimilarity_n_Orthology).	556	1888	14-3-3epsilon;14-3-3zeta;18w;a;Abl;Actn;Ady43A;ago;AGO2;Akap200;ALiX;alpha-Est9;alphaTub84B;aop;aph-1;apt;Arf79F;Argk;Arp1;Arp3;Arpc1;Arpc2;aru;ASPP;Atf3;Atpalpha;B4;babos;barc;bark;baz;bbg;beat-IIIc;Best1;betaggt-I;betaTub60D;betaTub97EF;bif;blow;Bsg;Btk29A;btsz;bun;by;cact;Cam;CAP;Caper;capt;Cbl;CdGAPr;cdi;CenG1A;cer;cert;Cf2;CG10082;CG10098;CG10126;CG10283;CG10337;CG10376;CG10527;CG11050;CG111…
5kbUpTx	Jra_w001	hocomoco__FOSL2_MOUSE.H10MO.A	4.27	0.0446	Jra	*	kay (inferredBy_Orthology).	Jra; cnc; mor (inferredBy_MotifSimilarity_n_Orthology).	851	3483	14-3-3epsilon;14-3-3zeta;18w;a;Abl;Act42A;Act5C;Actn;Ada2b;Adgf-A;Ady43A;ago;AGO1;AGO2;Akap200;Akt1;Aldh-III;ALiX;alph;alpha-Est10;alpha-Est3;alpha-Est9;alpha-Spec;alphaTub84B;AnxB10;AnxB9;aop;AP-1gamma;AP-1mu;Apc;aph-1;aPKC;apt;Arf51F;Arf79F;Argk;Arp1;Arp2;Arp3;Arpc1;Arpc2;Arpc4;aru;Atf3;Atg1;Atg17;Atg4a;Atpalpha;B4;babos;Baldspot;barc;bark;baz;bbg;beat-IIIc;Best1;betaTub60D;betaTub97EF;bif;bip1…
5kbUpTx	Jra_w001	cisbp__M2979	4.24	0.0444	Jra	*	cnc (inferredBy_Orthology).	Jra (inferredBy_MotifSimilarity_n_Orthology).	872	3845	14-3-3epsilon;14-3-3zeta;18w;a;Abl;Act42A;Actn;Ady43A;ago;AGO1;AGO2;Akap200;Aldh-III;ALiX;alph;alpha-Est3;alpha-Est7;alpha-Est9;alpha-Man-IIb;alphaTub84B;AMPdeam;AnxB10;AnxB9;aop;AP-1mu;aph-1;aPKC;Aps;apt;Arc2;Arf51F;Arf79F;Argk;Arp1;Arp2;Arp3;Arpc1;Arpc2;Asap;ASPP;Atet;Atf3;Atf6;Atg1;Atg18a;Atg4a;atl;Atpalpha;B4;babos;Baldspot;barc;bark;baz;bbg;beat-IIIc;Best1;betaggt-I;betaTub60D;betaTub97EF;bi…
5kbUpTx	Jra_w001	cisbp__M4526	4.18	0.0441	Jra	*	mor (inferredBy_Orthology).	Jra; cnc; ewg; kay; maf-S; tj (inferredBy_MotifSimilarity_n_Orthology).	1002	4288	14-3-3epsilon;14-3-3zeta;18w;a;Abi;Abl;Abp1;Acph-1;Act42A;Act5C;Actn;Ada2b;Ady43A;ago;AGO1;AGO2;AhcyL1;Akap200;Akt1;Aldh-III;ALiX;alph;alpha-Est10;alpha-Est3;alpha-Est9;alpha-Man-IIb;alphaTub84B;AMPdeam;AnxB9;aop;AP-1mu;Apc;aph-1;aPKC;apt;Arf51F;Arf79F;Argk;Arp1;Arp2;Arp3;Arpc1;Arpc2;Arpc4;aru;ASPP;Atf3;Atf6;Atg1;Atg17;atl;Atpalpha;ATPCL;B4;babos;Baldspot;barc;bark;baz;bbg;be;beat-IIIc;Best1;beta…
5kbUpTx	Jra_w001	transfac_public__M00495	4	0.0432	Jra	*	cnc (inferredBy_Orthology).	Jra (inferredBy_MotifSimilarity_n_Orthology).	418	1434	14-3-3epsilon;14-3-3zeta;18w;a;Abl;Actn;AGO1;AGO2;Akap200;ALiX;alpha-Man-IIb;alphaTub84B;AP-1mu;apt;Arf51F;Arp1;Arp3;Arpc1;Arpc2;Atf3;Atg1;Atg4a;Atpalpha;B4;barc;bark;beat-IIIc;Best1;betaTub60D;blow;Bsg;Btk29A;bun;by;cact;Cam;CAP;Caper;CdGAPr;CenG1A;cert;Cf2;CG10098;CG10126;CG10283;CG10337;CG10376;CG11141;CG1146;CG12007;CG12012;CG12054;CG12655;CG13117;CG13314;CG13366;CG13698;CG13751;CG14207;CG158…
5kbUpTx	Jra_w001	transfac_pro__M07685	3.98	0.0431	Jra	*	kay (directAnnotation).	Jra (inferredBy_MotifSimilarity).	564	1985	14-3-3epsilon;14-3-3zeta;a;Abl;Actn;ago;AGO2;Akap200;ALiX;alph;alpha-Est10;alphaSnap;alphaTub84B;AnxB9;aop;AP-1mu;aPKC;apt;Arf51F;Arf79F;Argk;Arp2;Arp3;Arpc1;Arpc2;Arpc4;Atf3;Atg1;Atg4a;Atpalpha;B4;babos;barc;bark;baz;bbg;beat-IIIc;Best1;beta-Spec;betaTub60D;bip1;blow;Btk29A;btsz;bun;by;cact;CalpB;Cam;CAP;Caper;capt;Cbl;CdGAPr;CenG1A;cert;CG10062;CG10082;CG10098;CG10103;CG10126;CG10283;CG10337;CG…
5kbUpTx	Jra_w001	cisbp__M2980	3.92	0.0428	Jra	*	cnc (inferredBy_Orthology).	Jra; kay (inferredBy_MotifSimilarity_n_Orthology).	791	3292	14-3-3epsilon;14-3-3zeta;18w;a;Abl;Abp1;Acsl;Act42A;Act5C;Actn;Ada2b;Adgf-A;Ady43A;AGO1;AhcyL1;Akap200;Akt1;Aldh-III;ALiX;alph;alpha-Est9;alpha-Man-IIb;alphaTub84B;AnxB9;aop;AP-1gamma;AP-1mu;Aps;apt;Arf51F;Arf79F;Argk;Arp1;Arp2;Arp3;Arpc1;Arpc2;Atf3;Atg1;Atg17;atl;Atpalpha;B4;babos;Baldspot;barc;bark;baz;bbg;bchs;beat-IIIc;Best1;betaTub60D;betaTub97EF;bif;blow;bru2;Bsg;Btk29A;btsz;bun;by;cact;CAP…
5kbUpTx	Jra_w001	transfac_public__M00490	3.9	0.0427	Jra	*	cnc (inferredBy_Orthology).	Jra; kay (inferredBy_MotifSimilarity_n_Orthology).	681	2666	14-3-3epsilon;14-3-3zeta;18w;a;Abl;Abp1;Acsl;Act42A;Act5C;Actn;Ada2b;Adgf-A;Ady43A;AGO1;Akap200;Akt1;Aldh-III;ALiX;alph;alpha-Est9;alphaTub84B;AnxB9;aop;AP-1gamma;AP-1mu;apt;Arf51F;Arf79F;Argk;Arp1;Arp2;Arp3;Arpc1;Arpc2;Atf3;Atg1;Atg17;Atpalpha;B4;babos;Baldspot;barc;bark;baz;bbg;beat-IIIc;Best1;betaTub60D;betaTub97EF;bif;blow;bru2;Bsg;Btk29A;bun;by;cact;Cam;CAP;Caper;capt;CdGAPr;cdi;CenG1A;cert;…
5kbUpTx	Jra_w001	cisbp__M6317	3.8	0.0422	Jra	**	Jra (inferredBy_Orthology).	kay; mor (inferredBy_MotifSimilarity_n_Orthology).	767	3082	14-3-3zeta;18w;a;Abl;Abp1;Acsl;Act42A;Act5C;Actn;Ada2b;Ady43A;ago;AGO1;AGO2;Akap200;Akt1;ALiX;alpha-Est10;alpha-Est9;alphaTub84B;AnxB9;aop;AP-1mu;Apc;aph-1;aPKC;apt;Arf51F;Arf79F;Argk;Arp2;Arp3;Arpc1;Arpc2;aru;Atf3;Atg1;Atpalpha;B4;babos;Baldspot;barc;bark;baz;bbg;bdg;Best1;betaggt-I;betaTub60D;betaTub97EF;bif;bip1;blow;bru2;Bsg;Btk29A;btsz;bun;bves;by;cact;CAH2;Cam;CanA-14F;CAP;Caper;capt;Cbl;Cd…
5kbUpTx	Jra_w001	cisbp__M2428	3.79	0.0421	Jra	*		Jra; kay (inferredBy_MotifSimilarity_n_Orthology).	452	1600	14-3-3zeta;18w;a;Abl;Actn;AGO1;Akap200;Akt1;ALiX;alphaTub84B;aop;aph-1;apt;Arf79F;Argk;Arpc2;ASPP;Atf3;Atg4a;Atpalpha;B4;babos;barc;bark;bbg;beat-IIIc;Best1;betaTub60D;bif;blow;bru2;Btk29A;bun;CAP;Caper;capt;Cbl;CdGAPr;cdi;CenG1A;cert;CG10098;CG10126;CG10283;CG10413;CG10527;CG11050;CG11125;CG11426;CG12054;CG12730;CG13117;CG13124;CG13366;CG13698;CG14207;CG14688;CG14907;CG1572;CG16791;CG17574;CG176…
5kbUpTx	Jra_w001	transfac_public__M00038	3.78	0.0421	Jra	*		Jra; kay; mor (inferredBy_MotifSimilarity_n_Orthology).	470	1745	14-3-3zeta;18w;a;Abl;Actn;AGO1;Akap200;Akt1;ALiX;alphaTub84B;AnxB9;aop;aph-1;apt;Arf79F;Argk;Arpc2;ASPP;Atf3;Atg4a;Atpalpha;B4;babos;barc;bark;baz;bbg;beat-IIIc;Best1;betaTub60D;bif;blow;bru2;Btk29A;bun;CAP;Caper;capt;Cbl;CdGAPr;cdi;CenG1A;CG10098;CG10126;CG10283;CG10413;CG10527;CG11050;CG11125;CG11426;CG12054;CG12730;CG13117;CG13124;CG13698;CG13917;CG14207;CG14688;CG14907;CG1572;CG16791;CG17574;…
5kbUpTx	Jra_w001	hocomoco__SMRC1_MOUSE.H10MO.B	3.73	0.0418	Jra	*	mor (inferredBy_Orthology).	Jra; cnc; ewg; kay; maf-S; tj (inferredBy_MotifSimilarity_n_Orthology).	680	2618	14-3-3zeta;18w;a;Abl;Abp1;Act42A;Act5C;Actn;Ady43A;AGO1;AGO2;Akap200;ALiX;alpha-Est3;alpha-Est9;alphaTub84B;AnxB9;aop;AP-1mu;apt;Arf79F;Argk;Arp3;Arpc1;Arpc2;Arpc4;aru;Atf3;Atg1;atl;Atpalpha;B4;babos;barc;bark;baz;bbg;beat-IIIc;Best1;betaTub60D;betaTub97EF;bif;bip1;blow;bru2;Bsg;Btk29A;btsz;bun;bves;by;cact;Cam;CAP;Caper;capt;CdGAPr;cdi;CenB1A;CenG1A;cer;cert;Cf2;CG10055;CG10082;CG10098;CG10126;C…
5kbUpTx	Jra_w001	hocomoco__JUNB_MOUSE.H10MO.B	3.67	0.0415	Jra	**	Jra (inferredBy_Orthology).	kay; mor (inferredBy_MotifSimilarity_n_Orthology).	835	3503	14-3-3zeta;18w;a;Abl;Abp1;Acsl;Act42A;Act5C;Actn;Ada2b;Ady43A;ago;AGO1;AGO2;Akap200;Akt1;ALiX;alph;alpha-Est10;alpha-Est9;alpha-Man-IIb;alphaTub84B;AnxB9;aop;AP-1mu;Apc;aph-1;aPKC;apt;Arf51F;Arf79F;Argk;Arp1;Arp2;Arp3;Arpc1;Arpc2;Arpc5;aru;Atf3;Atg1;Atpalpha;ATPCL;B4;babos;Baldspot;barc;bark;baz;bbg;bdg;beat-IIIc;Best1;beta-Spec;betaggt-I;betaTub60D;betaTub97EF;bif;bip1;blow;bru2;Bsg;Btk29A;btsz;…
5kbUpTx	Jra_w001	cisbp__M6467	3.65	0.0414	Jra	*	mor (inferredBy_Orthology).	Jra; cnc; ewg; kay; maf-S; tj (inferredBy_MotifSimilarity_n_Orthology).	662	2546	14-3-3zeta;18w;a;Abl;Abp1;Act42A;Act5C;Actn;Ady43A;AGO1;AGO2;Akap200;ALiX;alpha-Est9;alphaTub84B;AnxB9;aop;AP-1mu;apt;Arf79F;Argk;Arp3;Arpc1;Arpc2;Arpc4;aru;Atf3;Atg1;atl;Atpalpha;B4;babos;barc;bark;baz;bbg;beat-IIIc;Best1;betaTub60D;betaTub97EF;bif;bip1;blow;bru2;Bsg;Btk29A;btsz;bun;bves;by;cact;Cam;CAP;Caper;capt;CdGAPr;cdi;CenB1A;CenG1A;cer;cert;Cf2;CG10055;CG10082;CG10098;CG10126;CG10283;CG10…
5kbUpTx	Jra_w001	neph__UW.Motif.0001	3.64	0.0414	Jra	*		kay (inferredBy_MotifSimilarity). Jra; cnc (inferredBy_MotifSimilarity_n_Orthology).	761	3190	14-3-3epsilon;14-3-3zeta;a;aay;Abl;Abp1;Acsl;Act42A;Act5C;Actn;Adk1;Ady43A;ago;AGO1;AGO2;Akap200;Akt1;Aldh-III;ALiX;alph;alpha-Est10;alpha-Est9;alphaTub84B;AnxB11;AnxB9;aop;AP-1mu;aph-1;aPKC;apt;Arf79F;Argk;Arp2;Arp3;Arpc1;Arpc2;Arpc4;Arpc5;ASPP;Atf3;Atg1;Atpalpha;B4;babos;barc;bark;baz;bbg;beat-IIIc;Best1;beta-Spec;betaggt-I;betaTub60D;betaTub97EF;bif;blow;bru2;Bsg;Btk29A;bun;by;cact;CalpB;Cam;C…
5kbUpTx	Jra_w001	swissregulon__hs__BACH2.p2	3.5	0.0406	Jra	*	cnc (inferredBy_Orthology).	Jra; kay; mor (inferredBy_MotifSimilarity_n_Orthology).	1074	4979	14-3-3epsilon;14-3-3zeta;18w;a;Abi;Abl;Act42A;Act5C;Actn;Ada2b;Adar;Adk1;Ady43A;ago;AGO1;AGO2;AhcyL1;Akap200;Akt1;Alas;Aldh-III;Alg-2;ALiX;alph;alpha-Est10;alpha-Est3;alpha-Est7;alpha-Est9;alpha-Man-IIb;alpha-Spec;alphaTub84B;AMPdeam;AnxB10;AnxB9;aop;AP-1mu;AP-1sigma;Apc;aph-1;aPKC;apt;Arc2;Arf51F;Arf79F;Argk;Arp1;Arp2;Arp3;Arpc1;Arpc2;Arpc4;aru;Atf3;Atf6;Atg1;Atg17;Atg4a;atl;Atpalpha;B4;babos;Ba…
5kbUpTx	Jra_w001	hocomoco__BATF_HUMAN.H10MO.S	3.47	0.0405	Jra	*		Jra; kay (inferredBy_MotifSimilarity_n_Orthology).	939	4172	14-3-3epsilon;14-3-3zeta;18w;a;aay;Abi;Abl;Abp1;Acph-1;Acsl;Act42A;Act5C;Actn;Ada2b;Ady43A;ago;AGO1;AGO2;Akap200;Akt1;Aldh-III;Alg-2;ALiX;alph;alpha-Est10;alpha-Est3;alpha-Est9;alpha-Man-IIb;alphaTub84B;AMPdeam;AnxB9;aop;AP-1mu;aph-1;aPKC;apt;Arf51F;Arf79F;Argk;Arp1;Arp2;Arp3;Arpc1;Arpc2;Arpc4;aru;ASPP;Atf3;Atg1;Atg17;Atg18a;Atg4a;atl;Atpalpha;ATPCL;B4;babos;Baldspot;barc;bark;baz;bbg;bdg;beat-II…
5kbUpTx	Jra_w001	transfac_pro__M07678	3.43	0.0403	Jra	*	crc (directAnnotation).	Atf-2; Atf3; CG44247; CrebA; CrebB; Jra; kay (inferredBy_MotifSimilarity). Xbp1 (inferredBy_MotifSimilarity_n_Orthology).	324	1198	14-3-3epsilon;Abi;Acsl;Adk3;AGO2;Alg-2;ALiX;alpha-Est9;alpha-Spec;alphaTub84B;AMPdeam;AnxB9;aop;AP-1gamma;AP-2alpha;aPKC;apt;Arc2;Argk;Arpc2;Atpalpha;babo;beat-IIIc;beta-Spec;Bsg;bun;by;C3G;cact;Cam;CanA-14F;Ccm3;CD98hc;cdc14;CenB1A;CenG1A;CG10337;CG10365;CG10395;CG10413;CG1105;CG11357;CG11486;CG11791;CG12007;CG12065;CG12290;CG12384;CG12945;CG13117;CG13124;CG13377;CG13868;CG13887;CG13917;CG14207;…
5kbUpTx	Jra_w001	cisbp__M0320	3.41	0.0402	Jra	**	Jra (inferredBy_Orthology).	kay (inferredBy_MotifSimilarity_n_Orthology).	909	4251	14-3-3zeta;a;aay;Abi;Abl;Acsl;Actn;Adgf-A;AdipoR;AGO1;AGO2;Akap200;Akt1;alc;Aldh-III;Alg-2;ALiX;alph;alpha-Est9;alpha-Spec;alphaSnap;alphaTub84B;AnxB9;aop;AP-1gamma;AP-1mu;AP-2alpha;Apc;aPKC;apt;Arc1;Argk;Arp3;Arpc1;Arpc2;ASPP;Atf3;Atf6;Atg1;Atg17;Atpalpha;B4;babos;baf;barc;bark;baz;bbg;beat-IIIc;Best1;beta-Spec;betaTub60D;betaTub97EF;BI-1;bif;blow;Bmcp;bru2;Bsg;Btk29A;btsz;bun;bves;by;cact;CalpA…
5kbUpTx	Jra_w001	transfac_pro__M04846	3.27	0.0395	Jra	*		Jra; kay (inferredBy_MotifSimilarity).	267	954	a;Abl;Actn;AGO2;Akap200;ALiX;alphaTub84B;apt;Arp3;Arpc2;Atpalpha;B4;babos;bbg;Best1;betaTub60D;blow;Btk29A;bun;by;CAP;Caper;capt;CdGAPr;CenG1A;CG10098;CG10283;CG11050;CG11141;CG12054;CG13698;CG14207;CG16791;CG17574;CG17834;CG18659;CG1943;CG2938;CG30015;CG30344;CG30377;CG32137;CG32264;CG32369;CG32982;CG33229;CG34417;CG3530;CG4025;CG4101;CG42238;CG42268;CG42673;CG42674;CG43658;CG43759;CG44085;CG450…
5kbUpTx	Jra_w001	cisbp__M6158	3.26	0.0394	Jra	*		Jra; kay (inferredBy_MotifSimilarity_n_Orthology).	962	4369	14-3-3epsilon;14-3-3zeta;18w;a;aay;Abi;Abl;Abp1;Acph-1;Acsl;Act42A;Act5C;Actn;Ada2b;Adar;Adgf-A;Adk1;Ady43A;ago;AGO1;AGO2;Akap200;Akt1;Aldh-III;Alg-2;ALiX;alph;alpha-Est10;alpha-Est3;alpha-Est9;alpha-Man-IIb;alphaTub84B;AMPdeam;AnxB9;aop;AP-1mu;aph-1;aPKC;apt;Arf51F;Arf79F;Argk;Arp1;Arp2;Arp3;Arpc1;Arpc2;Arpc4;aru;ASPP;Atf3;Atg1;Atg17;Atg18a;Atg4a;atl;Atpalpha;ATPCL;B4;babos;Baldspot;barc;bark;ba…
5kbUpTx	Jra_w001	yetfasco__YBL103C_1445	3.21	0.0391	Jra	*		Jra; kay (inferredBy_MotifSimilarity).	340	1205	a;Abl;Actn;Adgf-A;Ady43A;ago;AGO1;Akap200;ALiX;alpha-Est9;alphaTub84B;aop;AP-2mu;apt;Argk;Arp2;Arp3;Arpc1;Atf3;Atpalpha;B4;barc;bark;bbg;beat-IIIc;Best1;betaTub60D;bif;blow;bru2;Btk29A;bun;CAP;capt;CdGAPr;CenG1A;CG10055;CG10082;CG10126;CG10283;CG10479;CG11050;CG11141;CG11426;CG12012;CG12560;CG12655;CG13117;CG13124;CG13366;CG15861;CG16791;CG17746;CG17834;CG2938;CG30015;CG30089;CG31038;CG31523;CG31…
5kbUpTx	Jra_w001	homer__TGCTGAGTCA_Bach2	3.16	0.0389	Jra	*	cnc (inferredBy_Orthology).	Jra; kay; maf-S; tj (inferredBy_MotifSimilarity_n_Orthology).	688	2766	14-3-3zeta;18w;a;Abl;Abp1;Act42A;Act5C;Actn;Ada2b;Ady43A;ago;AGO2;Akap200;Akt1;Aldh-III;ALiX;alph;alpha-Est10;alpha-Est9;alphaTub84B;AnxB9;AP-1mu;AP-2mu;aph-1;apt;Arf51F;Argk;Arp2;Arp3;Arpc1;Arpc2;aru;ASPP;Atf3;Atf6;Atg1;atl;Atpalpha;B4;babo;babos;Baldspot;barc;bark;baz;bbg;bchs;beat-IIIc;Best1;betaggt-I;betaTub60D;betaTub97EF;bip1;blow;bru2;Bsg;Btk29A;btsz;bun;by;cact;CAH2;CalpB;CanA-14F;CAP;Cap…
5kbUpTx	Jra_w001	swissregulon__hs__NFE2.p2	3.11	0.0386	Jra	*	cnc (inferredBy_Orthology).	Jra; ewg; kay; maf-S; tj (inferredBy_MotifSimilarity_n_Orthology).	646	2631	18w;a;Abl;Abp1;Act42A;Act5C;Ada2b;Ady43A;ago;AGO1;AhcyL1;Akap200;Akt1;ALiX;alph;alpha-Est10;alpha-Est3;alpha-Est9;alphaTub84B;AnxB9;aop;AP-1gamma;AP-2mu;aPKC;Aps;apt;Arf79F;Argk;Arp3;Arpc1;Arpc2;Atf3;Atg1;atl;Atpalpha;B4;babo;babos;Baldspot;barc;bark;baz;bbg;bchs;Best1;betaggt-I;betaTub60D;betaTub97EF;bip1;blow;bru2;Bsg;Btk29A;btsz;bun;by;c12.1;cact;CalpB;CanA-14F;CAP;Caper;capt;cathD;Cbl;CdGAPr;…
5kbUpTx	Jra_w001	cisbp__M6229	3.1	0.0386	Jra	*	kay (inferredBy_Orthology).	Jra; cnc; ewg; maf-S; tj (inferredBy_MotifSimilarity_n_Orthology).	371	1308	14-3-3zeta;a;Abl;Ady43A;AGO1;Akap200;ALiX;alphaTub84B;aop;aph-1;apt;Argk;Arp2;Arpc2;Atg1;atl;Atpalpha;B4;babo;Baldspot;barc;bark;baz;bbg;Best1;betaTub60D;bif;bru2;Btk29A;btsz;bun;by;cact;Cam;CAP;Caper;capt;CdGAPr;CenG1A;Cf2;CG10126;CG10283;CG10337;CG10479;CG10527;CG10795;CG11050;CG11125;CG11141;CG1146;CG11753;CG12012;CG12054;CG12065;CG12290;CG13117;CG13384;CG13751;CG13893;CG13917;CG13921;CG14207;…
5kbUpTx	Jra_w001	transfac_pro__M04681	3.1	0.0386	Jra	**	Jra (inferredBy_Orthology).	Atf-2; Atf3; Atf6; CG44247; CrebA; CrebB; REPTOR-BP; cnc; kay (inferredBy_MotifSimilarity). Xbp1 (inferredBy_MotifSimilarity_n_Orthology).	259	914	14-3-3zeta;Abi;Abl;alpha-Spec;alphaTub84B;AnxB9;AP-2alpha;Argk;Arp1;ASPP;Atpalpha;babo;bbg;beta-Spec;Bmcp;Bsg;bun;by;C3G;Cam;CAP;Ccm3;CD98hc;cdc14;CenB1A;CenG1A;CG10089;CG10103;CG10337;CG10365;CG10383;CG10413;CG10527;CG1105;CG1146;CG11486;CG12290;CG12384;CG12945;CG13124;CG13868;CG13887;CG14275;CG14767;CG14883;CG14985;CG15611;CG1572;CG17746;CG18343;CG2698;CG30069;CG30089;CG30377;CG30456;CG30460;CG…
5kbUpTx	Jra_w001	swissregulon__hs__JUN.p2	3.07	0.0384	Jra	**	Jra (inferredBy_Orthology).	Atf-2; Atf3; Atf6; CG44247; CrebA; CrebB; crc; kay (inferredBy_MotifSimilarity). Xbp1 (inferredBy_MotifSimilarity_n_Orthology).	226	792	14-3-3epsilon;Abl;Adk1;alpha-Spec;alphaTub84B;AnxB9;AP-2alpha;Argk;Arp1;ASPP;Atpalpha;babo;beat-IIIc;beta-Spec;Bmcp;Bsg;bun;by;Cam;CAP;Ccm3;CD98hc;cdc14;CenB1A;CenG1A;CG10089;CG10103;CG10383;CG10413;CG1105;CG12290;CG12384;CG12945;CG13124;CG13366;CG13868;CG13887;CG14275;CG14767;CG14883;CG14985;CG1572;CG17574;CG17746;CG18343;CG30069;CG30089;CG30377;CG30456;CG30460;CG31650;CG32066;CG32069;CG32264;CG…
5kbUpTx	Jra_w001	cisbp__M4624	3.05	0.0383	Jra	**	Jra (inferredBy_Orthology).	Atf-2; Atf3; Atf6; CG44247; CrebA; CrebB; REPTOR-BP; crc; kay (inferredBy_MotifSimilarity). Xbp1 (inferredBy_MotifSimilarity_n_Orthology).	324	1184	14-3-3zeta;Abi;Acsl;alpha-Spec;alphaTub84B;AnxB9;AP-2alpha;Arc2;Argk;Arp1;Atg1;Atpalpha;B4;babo;baf;bbg;beat-IIIc;Best1;beta-Spec;blow;Bmcp;bru2;Bsg;bun;bves;by;C3G;CalpA;CAP;Ccm3;CD98hc;cdc14;CenB1A;CenG1A;CG10089;CG10103;CG10337;CG10365;CG10383;CG10413;CG10527;CG1105;CG1146;CG11486;CG12065;CG12290;CG12384;CG12945;CG13124;CG13868;CG13887;CG13917;CG14207;CG14275;CG14478;CG14767;CG14883;CG14985;CG…
5kbUpTx	Jra_w001	homer__NATGASTCABNN_Fosl2	3.01	0.0381	Jra	*	kay (inferredBy_Orthology).	Jra (inferredBy_MotifSimilarity). cnc; mor (inferredBy_MotifSimilarity_n_Orthology).	828	3621	14-3-3epsilon;14-3-3zeta;18w;a;aay;Abl;Abp1;Acsl;Act42A;Act5C;Actn;Ady43A;ago;AGO1;AGO2;Akap200;Akt1;Aldh-III;ALiX;alph;alpha-Est10;alpha-Est9;alphaTub84B;AnxB9;aop;AP-1mu;aph-1;apt;Arf51F;Arf79F;Argk;Arp2;Arp3;Arpc1;Arpc2;ASPP;Atf3;Atg1;Atpalpha;B4;babo;babos;Baldspot;barc;bark;baz;bbg;bdg;beat-IIIc;Best1;betaggt-I;betaTub60D;betaTub97EF;bif;bip1;blow;bru2;Bsg;Btk29A;btsz;bun;bves;by;cact;CAH2;C…
5kbUpTx	Jra_w005	homer__DATGASTCAT_BATF	8.65	0.138	Jra	*		Jra; kay (inferredBy_MotifSimilarity). NFAT (inferredBy_MotifSimilarity_n_Orthology).	84	4312	Act5C;AMPdeam;be;betaTub97EF;CAP;CG10098;CG10527;CG10916;CG11426;CG13255;CG13314;CG15611;CG17544;CG18659;CG2765;CG30154;CG31710;CG34194;CG34417;CG4101;CG4199;CG5835;CG5953;CG6051;CG6218;CG7546;CG9328;CG9801;Chd64;Chmp1;CHMP2B;cindr;Diap1;E(spl)mbeta-HLH;Fas1;GAPcenA;Gli;Graf;hebe;hid;hppy;Hr39;Hr4;ifc;insc;Jra;Klp64D;Lac;Lapsyn;lqf;Mlc-c;moody;pcs;prominin-like;Ptp99A;puc;Rab30;Rab8;Rgl;RhoGAP15B…
5kbUpTx	Jra_w005	hocomoco__JUND_HUMAN.H10MO.A	8.47	0.136	Jra	**	Jra (inferredBy_Orthology).	kay (inferredBy_MotifSimilarity). cnc (inferredBy_MotifSimilarity_n_Orthology).	73	3237	Act5C;betaTub97EF;CAP;CG10098;CG10527;CG10916;CG11426;CG11658;CG13255;CG13314;CG17544;CG18659;CG2765;CG31710;CG34417;CG4101;CG4199;CG5835;CG5953;CG6051;CG7546;CG9328;CG9801;Chd64;Chmp1;CHMP2B;cindr;dia;Diap1;E(spl)mbeta-HLH;Fas1;GAPcenA;Gli;hebe;hid;hppy;Hr39;Hr4;ifc;insc;Jra;Lac;Lapsyn;Mlc-c;pcs;prominin-like;Ptp99A;puc;Rab30;Rab8;Rgl;RhoGAP15B;RhoGDI;RhoU;rpr;Sara;sky;Socs44A;spict;Spn55B;sqh;S…
5kbUpTx	Jra_w005	cisbp__M6318	8.32	0.134	Jra	**	Jra (inferredBy_Orthology).	kay (inferredBy_MotifSimilarity). cnc (inferredBy_MotifSimilarity_n_Orthology).	83	4442	Act5C;betaTub97EF;CAP;CG10098;CG10527;CG10916;CG11426;CG11658;CG13255;CG13314;CG15611;CG17544;CG18659;CG2765;CG30154;CG31710;CG34417;CG4101;CG4199;CG5835;CG5953;CG6051;CG7546;CG9328;CG9801;Chd64;Chmp1;CHMP2B;cindr;dia;Diap1;E(spl)mbeta-HLH;Fas1;GAPcenA;GlcAT-S;Gli;hebe;hid;hppy;Hr39;Hr4;ifc;insc;Jra;Klp64D;Lac;Lapsyn;lqf;Mlc-c;moody;pcs;prominin-like;Ptp99A;puc;Rab30;Rab8;Rgl;RhoGAP15B;RhoGAP68F;…
5kbUpTx	Jra_w005	hocomoco__FOS_HUMAN.H10MO.A	8.3	0.133	Jra	*	kay (inferredBy_Orthology).	Jra (inferredBy_MotifSimilarity). cnc; mor (inferredBy_MotifSimilarity_n_Orthology).	85	4308	Act5C;be;betaTub97EF;CAP;CG10098;CG10527;CG10916;CG11426;CG11658;CG13255;CG13314;CG15611;CG17544;CG18659;CG2765;CG30154;CG31710;CG34194;CG34417;CG4101;CG4199;CG5835;CG5953;CG6051;CG7546;CG9328;CG9801;Chd64;Chmp1;CHMP2B;cindr;dia;Diap1;E(spl)mbeta-HLH;Fas1;GAPcenA;GATAd;GlcAT-S;Gli;hebe;hid;hppy;Hr39;Hr4;ifc;insc;Jra;Klp64D;Lac;Lapsyn;lqf;Mlc-c;pcs;prominin-like;Ptp99A;puc;Rab30;Rab8;Rgl;RhoGAP15B…
5kbUpTx	Jra_w005	cisbp__M0344	8.29	0.133	Jra	*		Jra; kay (inferredBy_MotifSimilarity_n_Orthology).	69	3297	betaTub97EF;CAP;CG10098;CG10527;CG11426;CG11658;CG13255;CG13314;CG17544;CG18659;CG2765;CG31710;CG34417;CG4101;CG4199;CG5835;CG5953;CG6051;CG7546;CG9328;CG9801;Chd64;Chmp1;CHMP2B;cindr;Diap1;E(spl)mbeta-HLH;Fas1;GAPcenA;Gli;hebe;hid;hppy;Hr39;Hr4;ifc;insc;Jra;Lac;Lapsyn;lqf;Mlc-c;moody;pcs;prominin-like;Ptp99A;puc;Rab30;Rab8;Rgl;RhoGDI;RhoU;rpr;sky;Smg6;Socs44A;Spn55B;sqh;Swip-1;Syx7;Traf4;Tre1;Ts…
5kbUpTx	Jra_w005	hocomoco__FOSL1_HUMAN.H10MO.A	8.28	0.133	Jra	*	kay (inferredBy_Orthology).	Jra (inferredBy_MotifSimilarity).	76	3237	Act5C;betaTub97EF;CAP;CG10098;CG10527;CG10916;CG11426;CG11658;CG13255;CG13314;CG15611;CG17544;CG18659;CG2765;CG30154;CG31710;CG34417;CG4101;CG4199;CG5835;CG5953;CG6051;CG7546;CG9328;CG9801;Chd64;Chmp1;CHMP2B;cindr;dia;Diap1;E(spl)mbeta-HLH;Fas1;GAPcenA;Gli;hebe;hid;hppy;Hr39;Hr4;ifc;insc;Jra;Lac;Lapsyn;Mlc-c;pcs;prominin-like;Ptp99A;puc;Rab30;Rab8;Rgl;RhoGAP15B;RhoGDI;RhoU;rpr;Sara;sky;Socs44A;sp…
5kbUpTx	Jra_w005	cisbp__M2280	8.21	0.132	Jra	*	kay (inferredBy_Orthology).	Jra (inferredBy_MotifSimilarity). maf-S; mor (inferredBy_MotifSimilarity_n_Orthology).	86	4625	Act5C;AMPdeam;be;betaTub97EF;CAP;CG10098;CG10527;CG10916;CG11426;CG11658;CG13255;CG13314;CG15611;CG17544;CG18659;CG2765;CG30154;CG31710;CG34194;CG34417;CG4101;CG4199;CG5835;CG5953;CG6051;CG7546;CG9328;CG9801;Chd64;Chmp1;CHMP2B;cindr;dia;Diap1;E(spl)mbeta-HLH;Fas1;GATAd;GlcAT-S;Gli;hebe;hid;hppy;Hr39;Hr4;ifc;insc;Jra;Klp64D;Lac;Lapsyn;lqf;Mlc-c;pcs;prominin-like;Ptp99A;puc;Rab30;Rab8;Rgl;RhoGAP15B…
5kbUpTx	Jra_w005	cisbp__M2292	8.19	0.132	Jra	**	Jra (inferredBy_Orthology).	kay (inferredBy_MotifSimilarity). mor (inferredBy_MotifSimilarity_n_Orthology).	83	4110	Act5C;AMPdeam;betaTub97EF;CAP;CG10098;CG10527;CG10916;CG11426;CG11658;CG13314;CG15611;CG17544;CG18659;CG2765;CG30154;CG31710;CG34417;CG4101;CG4199;CG5835;CG5953;CG6051;CG7546;CG9328;CG9801;Chd64;Chmp1;CHMP2B;cindr;dia;Diap1;E(spl)mbeta-HLH;Fas1;GAPcenA;GlcAT-S;Gli;hebe;hid;hppy;Hr39;Hr4;ifc;insc;Jra;Klp64D;Lac;Lapsyn;lqf;Mlc-c;moody;pcs;prominin-like;Ptp99A;puc;Rab30;Rab8;Rgl;RhoGAP15B;RhoGAP68F;…
5kbUpTx	Jra_w005	homer__NNATGASTCATH_Fra1	8.16	0.132	Jra	*		Jra; kay (inferredBy_MotifSimilarity). cnc; mor (inferredBy_MotifSimilarity_n_Orthology).	78	3573	Act5C;betaTub97EF;CAP;CG10098;CG10527;CG10916;CG11426;CG11658;CG13255;CG13314;CG17544;CG18659;CG2765;CG31710;CG34417;CG4101;CG4199;CG5835;CG5953;CG6051;CG7546;CG9328;CG9801;Chd64;Chmp1;CHMP2B;cindr;dia;Diap1;E(spl)mbeta-HLH;Fas1;GAPcenA;Gli;hebe;hid;hppy;Hr39;Hr4;ifc;insc;Jra;Klp64D;Lac;Lapsyn;lqf;Mlc-c;moody;pcs;prominin-like;Ptp99A;puc;Rab30;Rab8;Rgl;RhoGAP15B;RhoGAP68F;RhoGDI;RhoU;Rok;rpr;Sara…
5kbUpTx	Jra_w005	transfac_pro__M02876	8.1	0.131	Jra	*		Jra; kay (inferredBy_MotifSimilarity).	68	3069	Act5C;betaTub97EF;CAP;CG10098;CG10527;CG11426;CG13255;CG13314;CG18659;CG2765;CG34417;CG4101;CG4199;CG5835;CG5953;CG6051;CG7546;CG9328;CG9801;Chd64;CHMP2B;cindr;Diap1;E(spl)mbeta-HLH;Fas1;GAPcenA;Gli;hebe;hid;hppy;Hr39;Hr4;ifc;insc;Jra;Klp64D;Lac;Lapsyn;lqf;Mlc-c;pcs;prominin-like;Ptp99A;puc;Rab30;Rab8;Rgl;RhoGAP15B;RhoGDI;RhoU;rpr;Sara;sky;Smg6;Socs44A;spict;Spn55B;sqh;Swip-1;Syx7;Traf4;Tre1;Tsp4…
5kbUpTx	Jra_w005	jaspar__MA0478.1	8.09	0.131	Jra	*	kay (inferredBy_Orthology).	Jra (inferredBy_MotifSimilarity). mor (inferredBy_MotifSimilarity_n_Orthology).	87	4308	Act5C;AMPdeam;be;betaTub97EF;CAP;CG10098;CG10527;CG10916;CG11426;CG11658;CG13255;CG13314;CG15611;CG17544;CG18659;CG2765;CG30154;CG31710;CG34194;CG34417;CG4101;CG4199;CG5835;CG5953;CG6051;CG7546;CG9328;CG9801;Chd64;Chmp1;CHMP2B;cindr;dia;Diap1;E(spl)mbeta-HLH;Fas1;GAPcenA;GlcAT-S;Gli;hebe;hid;hppy;Hr39;Hr4;ifc;insc;Jra;Klp64D;Lac;Lapsyn;lqf;Mlc-c;moody;pcs;prominin-like;Ptp99A;puc;Rab30;Rab8;Rgl;R…
5kbUpTx	Jra_w005	hocomoco__FOSL2_HUMAN.H10MO.A	8.02	0.13	Jra	*	kay (inferredBy_Orthology).	Jra; cnc; mor (inferredBy_MotifSimilarity_n_Orthology).	80	3582	Act5C;be;betaTub97EF;CAP;CG10098;CG10527;CG10916;CG11426;CG11658;CG13255;CG13314;CG15611;CG17544;CG18659;CG2765;CG30154;CG31710;CG34194;CG34417;CG4101;CG4199;CG5835;CG5953;CG6051;CG7546;CG9328;CG9801;Chd64;Chmp1;CHMP2B;cindr;dia;Diap1;E(spl)mbeta-HLH;Fas1;GlcAT-S;Gli;hebe;hid;hppy;Hr39;Hr4;ifc;insc;Jra;Lac;Lapsyn;lqf;Mlc-c;pcs;prominin-like;Ptp99A;puc;Rab30;Rab8;Rgl;RhoGAP15B;RhoGDI;RhoU;rpr;Sara…
5kbUpTx	Jra_w005	scertf__spivak.GCN4	8	0.13	Jra	*		Jra; kay (inferredBy_MotifSimilarity). NFAT; cnc (inferredBy_MotifSimilarity_n_Orthology).	85	4665	Act5C;betaTub97EF;CAP;CG10098;CG10527;CG10916;CG11426;CG11658;CG13255;CG13314;CG15611;CG17544;CG18659;CG2765;CG30154;CG31710;CG34417;CG4101;CG4199;CG5835;CG5953;CG6051;CG7546;CG9328;CG9801;Chd64;Chmp1;CHMP2B;cindr;dia;Diap1;E(spl)mbeta-HLH;Fas1;GAPcenA;GlcAT-S;Gli;Graf;hebe;hid;hppy;Hr39;Hr4;ifc;insc;Jra;Klp64D;Lac;Lapsyn;lqf;Mlc-c;moody;Nep2;pcs;prominin-like;Ptp99A;puc;Rab30;Rab8;Rgl;RhoGAP15B;…
5kbUpTx	Jra_w005	cisbp__M4531	8	0.129	Jra	**	Jra (inferredBy_Orthology).	kay (inferredBy_MotifSimilarity).	70	2729	Act5C;betaTub97EF;CAP;CG10098;CG10527;CG11426;CG11658;CG13255;CG13314;CG18659;CG2765;CG31710;CG34417;CG4101;CG4199;CG5835;CG5953;CG6051;CG7546;CG9328;CG9801;Chd64;Chmp1;CHMP2B;cindr;dia;Diap1;E(spl)mbeta-HLH;Fas1;GAPcenA;Gli;hebe;hid;Hr39;Hr4;ifc;insc;Jra;Lac;Lapsyn;Mlc-c;pcs;prominin-like;Ptp99A;puc;Rab30;Rab8;Rgl;RhoGAP15B;RhoGDI;RhoU;rpr;Sara;sky;Socs44A;spict;Spn55B;sqh;Swip-1;Syx7;Traf4;Tre1…
5kbUpTx	Jra_w005	factorbook__AP1	7.95	0.129	Jra	**	Jra; kay (inferredBy_Orthology).	mor (inferredBy_MotifSimilarity_n_Orthology).	81	3759	Act5C;be;betaTub97EF;CAP;CG10098;CG10527;CG10916;CG11426;CG13255;CG13314;CG15611;CG1572;CG17544;CG18659;CG2765;CG30154;CG31710;CG34417;CG4101;CG4199;CG5835;CG5953;CG6051;CG7546;CG9328;CG9801;Chd64;Chmp1;CHMP2B;cindr;dia;Diap1;E(spl)mbeta-HLH;Fas1;GAPcenA;Gli;hebe;hid;hppy;Hr39;Hr4;ifc;insc;Jra;Lac;Lapsyn;lqf;Mlc-c;moody;pcs;prominin-like;Ptp99A;puc;Rab30;Rab8;Rgl;RhoGAP15B;RhoGDI;RhoU;Rok;rpr;Sar…
5kbUpTx	Jra_w005	homer__DATGASTCATHN_Atf3	7.88	0.128	Jra	*		Jra; kay (inferredBy_MotifSimilarity).	77	3380	Act5C;betaTub97EF;CAP;CG10098;CG10527;CG10916;CG11426;CG11658;CG13255;CG13314;CG15611;CG17544;CG18659;CG2765;CG30154;CG31710;CG34417;CG4101;CG4199;CG5835;CG5953;CG6051;CG7546;CG9328;CG9801;Chd64;Chmp1;CHMP2B;cindr;dia;Diap1;E(spl)mbeta-HLH;Fas1;GAPcenA;Gli;hebe;hid;hppy;Hr39;Hr4;ifc;insc;Jra;Klp64D;Lac;Lapsyn;Mlc-c;pcs;prominin-like;Ptp99A;puc;Rab30;Rab8;Rgl;RhoGAP15B;RhoGDI;RhoU;rpr;Sara;sky;Soc…
5kbUpTx	Jra_w005	cisbp__M2278	7.84	0.127	Jra	*	kay (inferredBy_Orthology).	Jra (inferredBy_MotifSimilarity_n_Orthology).	75	3049	Act5C;betaTub97EF;CAP;CG10098;CG10527;CG10916;CG11426;CG11658;CG13255;CG13314;CG17544;CG18659;CG2765;CG31710;CG34417;CG4101;CG4199;CG5835;CG5953;CG6051;CG7546;CG9328;CG9801;Chd64;Chmp1;CHMP2B;cindr;dia;Diap1;E(spl)mbeta-HLH;Fas1;GAPcenA;Gli;hebe;hid;hppy;Hr39;Hr4;ifc;insc;Jra;Lac;Lapsyn;Mlc-c;pcs;prominin-like;Ptp99A;puc;Rab30;Rab8;Rgl;RhoGAP15B;RhoGAP68F;RhoGDI;RhoU;rpr;Sara;sky;Socs44A;spict;Sp…
5kbUpTx	Jra_w005	jaspar__MA0476.1	7.83	0.127	Jra	*	kay (inferredBy_Orthology).	Jra (inferredBy_MotifSimilarity_n_Orthology).	85	4013	Act5C;AMPdeam;betaTub97EF;CAP;CG10098;CG10527;CG10916;CG11426;CG11658;CG13255;CG13314;CG15611;CG1572;CG17544;CG18659;CG2765;CG30154;CG31710;CG34194;CG34417;CG4101;CG4199;CG5835;CG5953;CG6051;CG7546;CG9328;CG9801;Chd64;Chmp1;CHMP2B;cindr;dia;Diap1;E(spl)mbeta-HLH;Fas1;GAPcenA;GATAd;GlcAT-S;Gli;hebe;hid;hppy;Hr39;Hr4;ifc;insc;Jra;Klp64D;Lac;Lapsyn;Mlc-c;pcs;prominin-like;Ptp99A;puc;Rab30;Rab8;Rgl;R…
5kbUpTx	Jra_w005	jaspar__MA0491.1	7.82	0.127	Jra	**	Jra (inferredBy_Orthology).	kay (inferredBy_MotifSimilarity). mor (inferredBy_MotifSimilarity_n_Orthology).	86	4038	Act5C;AMPdeam;be;betaTub97EF;CAP;CG10098;CG10527;CG10916;CG11426;CG11658;CG13255;CG15611;CG1572;CG17544;CG18659;CG2765;CG30154;CG31710;CG34417;CG4101;CG4199;CG5835;CG5953;CG6051;CG7546;CG9328;CG9801;Chd64;Chmp1;CHMP2B;cindr;dia;Diap1;E(spl)mbeta-HLH;Fas1;GAPcenA;GlcAT-S;Gli;hebe;hid;hppy;Hr39;Hr4;ifc;insc;Jra;Klp64D;Lac;Lapsyn;lqf;Mlc-c;moody;Nep2;pcs;prominin-like;Ptp99A;puc;Rab8;Rgl;RhoGAP15B;R…
5kbUpTx	Jra_w005	jaspar__MA0490.1	7.82	0.127	Jra	**	Jra (inferredBy_Orthology).	kay (inferredBy_MotifSimilarity). mor (inferredBy_MotifSimilarity_n_Orthology).	82	3573	Act5C;AMPdeam;be;betaTub97EF;CAP;CG10098;CG10527;CG10916;CG11426;CG11658;CG13255;CG13314;CG15611;CG17544;CG18659;CG2765;CG30154;CG31710;CG34194;CG34417;CG4101;CG4199;CG5835;CG5953;CG6051;CG7546;CG9328;CG9801;Chd64;Chmp1;CHMP2B;cindr;dia;Diap1;E(spl)mbeta-HLH;Fas1;GAPcenA;Gli;hebe;hid;hppy;Hr39;Hr4;ifc;insc;Jra;Lac;Lapsyn;lqf;Mlc-c;moody;pcs;prominin-like;Ptp99A;puc;Rab30;Rab8;Rgl;RhoGAP15B;RhoGDI…
5kbUpTx	Jra_w005	cisbp__M2291	7.81	0.127	Jra	**	Jra (inferredBy_Orthology).	kay (inferredBy_MotifSimilarity). mor (inferredBy_MotifSimilarity_n_Orthology).	83	3906	Act5C;AMPdeam;be;betaTub97EF;CAP;CG10098;CG10527;CG10916;CG11426;CG11658;CG13255;CG13314;CG15611;CG17544;CG18659;CG2765;CG30154;CG31710;CG34417;CG4101;CG4199;CG5835;CG5953;CG6051;CG7546;CG9328;CG9801;Chd64;Chmp1;CHMP2B;cindr;dia;Diap1;E(spl)mbeta-HLH;Fas1;GAPcenA;GATAd;Gli;hebe;hid;hppy;Hr39;Hr4;ifc;insc;Jra;Klp64D;Lac;Lapsyn;lqf;Mlc-c;moody;pcs;prominin-like;Ptp99A;puc;Rab30;Rab8;Rgl;RhoGAP15B;R…
5kbUpTx	Jra_w005	homer__ATGACTCATC_AP-1	7.77	0.126	Jra	**	Jra (inferredBy_Orthology).	kay (inferredBy_MotifSimilarity). cnc; maf-S; mor (inferredBy_MotifSimilarity_n_Orthology).	80	3691	Act5C;AMPdeam;be;betaTub97EF;CAP;CG10098;CG10527;CG10916;CG11426;CG11658;CG13255;CG13314;CG15611;CG17544;CG18659;CG2765;CG31710;CG34417;CG4101;CG4199;CG5835;CG5953;CG6051;CG7546;CG9328;CG9801;Chd64;Chmp1;CHMP2B;cindr;dia;Diap1;E(spl)mbeta-HLH;Fas1;GAPcenA;GlcAT-S;Gli;hebe;hid;hppy;Hr39;Hr4;ifc;insc;Jra;Lac;Lapsyn;Mlc-c;moody;pcs;prominin-like;Ptp99A;puc;Rab30;Rab8;Rgl;RhoGAP15B;RhoGAP68F;RhoGDI;R…
5kbUpTx	Jra_w005	homer__GATGACTCATCN_Jun-AP1	7.76	0.126	Jra	**	Jra (inferredBy_Orthology).	kay (inferredBy_MotifSimilarity). cnc; mor (inferredBy_MotifSimilarity_n_Orthology).	65	2184	Act5C;betaTub97EF;CAP;CG10098;CG10527;CG11426;CG13255;CG13314;CG17544;CG18659;CG2765;CG31710;CG34417;CG4101;CG4199;CG5835;CG5953;CG6051;CG7546;CG9328;CG9801;Chd64;Chmp1;CHMP2B;cindr;Diap1;E(spl)mbeta-HLH;Fas1;GAPcenA;Gli;hebe;hid;Hr39;Hr4;ifc;insc;Jra;Lac;Lapsyn;Mlc-c;pcs;prominin-like;Ptp99A;puc;Rab30;Rab8;Rgl;RhoGAP15B;RhoGDI;RhoU;rpr;sky;Socs44A;Spn55B;sqh;Swip-1;Syx7;Traf4;Tsp42Ec;Tsp42Ef;var…
5kbUpTx	Jra_w005	flyfactorsurvey__kay_Jra_SANGER_5_FBgn0001291	7.65	0.125	Jra	**	Jra (directAnnotation).	kay (inferredBy_MotifSimilarity).	71	3069	Act5C;betaTub97EF;CAP;CG10098;CG10527;CG11426;CG13255;CG13314;CG18659;CG2765;CG30154;CG31710;CG34417;CG4101;CG4199;CG5835;CG5953;CG6051;CG7546;CG9328;CG9801;Chd64;Chmp1;CHMP2B;cindr;dia;Diap1;E(spl)mbeta-HLH;Fas1;GAPcenA;Gli;hebe;hid;Hr39;Hr4;ifc;insc;Jra;Klp64D;Lac;Lapsyn;lqf;Mlc-c;moody;pcs;prominin-like;Ptp99A;puc;Rab30;Rab8;Rgl;RhoGAP15B;RhoGDI;Rok;rpr;sky;Socs44A;Spn55B;sqh;Swip-1;Syx7;Traf4…
5kbUpTx	Jra_w005	hocomoco__JUNB_HUMAN.H10MO.C	7.65	0.125	Jra	**	Jra (inferredBy_Orthology).	cnc; kay; mor (inferredBy_MotifSimilarity_n_Orthology).	81	3787	Act5C;betaTub97EF;CAP;CG10098;CG10527;CG10916;CG11426;CG11658;CG13255;CG13314;CG15611;CG1572;CG17544;CG18659;CG2765;CG30154;CG31710;CG34194;CG34417;CG4101;CG4199;CG5835;CG5953;CG6051;CG9328;CG9801;Chd64;Chmp1;CHMP2B;cindr;dia;Diap1;E(spl)mbeta-HLH;Fas1;GlcAT-S;Gli;hebe;hid;hppy;Hr39;Hr4;ifc;insc;Jra;Klp64D;Lac;Lapsyn;Mlc-c;moody;pcs;prominin-like;Ptp99A;puc;Rab30;Rab8;Rgl;RhoGAP15B;RhoGDI;RhoU;Ro…
5kbUpTx	Jra_w005	transfac_pro__M07685	7.62	0.124	Jra	*	kay (directAnnotation).	Jra (inferredBy_MotifSimilarity).	75	3768	betaTub97EF;CAP;CG10098;CG10527;CG10916;CG11426;CG11658;CG13314;CG17544;CG18659;CG2765;CG31710;CG34417;CG4101;CG4199;CG5835;CG5953;CG6051;CG7546;CG9328;CG9801;Chd64;Chmp1;CHMP2B;cindr;dia;Diap1;E(spl)mbeta-HLH;Fas1;GAPcenA;Gli;hebe;hid;hppy;Hr39;Hr4;insc;Jra;Klp64D;Lac;Lapsyn;lqf;Mlc-c;pcs;prominin-like;Ptp99A;puc;Rab30;Rab8;Rgl;RhoGAP15B;RhoGAP68F;RhoGDI;RhoU;rpr;Sara;sky;Smg6;Socs44A;spict;Spn5…
5kbUpTx	Jra_w005	cisbp__M4608	7.61	0.124	Jra	**	Jra (inferredBy_Orthology).	kay (inferredBy_MotifSimilarity). cnc (inferredBy_MotifSimilarity_n_Orthology).	80	3744	Act5C;betaTub97EF;CAP;CG10098;CG10527;CG10916;CG11426;CG11658;CG13255;CG13314;CG15611;CG17544;CG18659;CG2765;CG30154;CG31710;CG34417;CG4101;CG4199;CG5835;CG5953;CG6051;CG7546;CG9328;CG9801;Chd64;Chmp1;CHMP2B;cindr;dia;Diap1;E(spl)mbeta-HLH;Fas1;GAPcenA;GlcAT-S;Gli;hebe;hid;hppy;Hr39;Hr4;ifc;insc;Jra;Klp64D;Lac;Lapsyn;lqf;Mlc-c;pcs;prominin-like;Ptp99A;puc;Rab30;Rab8;Rgl;RhoGAP15B;RhoGDI;RhoU;rpr;…
5kbUpTx	Jra_w005	swissregulon__sacCer__GCN4	7.61	0.124	Jra	*		Jra; kay (inferredBy_MotifSimilarity). NFAT; cnc (inferredBy_MotifSimilarity_n_Orthology).	79	4357	Act5C;betaTub97EF;CAP;CG10098;CG10527;CG11426;CG11658;CG13255;CG13314;CG15611;CG17544;CG18659;CG2765;CG34417;CG4101;CG4199;CG5835;CG5953;CG6051;CG7546;CG9328;CG9801;Chd64;CHMP2B;cindr;dia;Diap1;E(spl)mbeta-HLH;Fas1;GAPcenA;GlcAT-S;Gli;Graf;hebe;hid;hppy;Hr39;Hr4;ifc;insc;Jra;Klp64D;Lac;Lapsyn;lqf;Mlc-c;moody;Nep2;pcs;prominin-like;Ptp99A;puc;Rab30;Rab8;Rgl;RhoGAP15B;RhoGDI;RhoU;Rok;rpr;sky;Smg6;S…
5kbUpTx	Jra_w005	cisbp__M4590	7.46	0.122	Jra	*	kay (inferredBy_Orthology).	Jra; mor (inferredBy_MotifSimilarity_n_Orthology).	74	2945	Act5C;betaTub97EF;CAP;CG10098;CG10527;CG10916;CG11426;CG11658;CG13255;CG15611;CG17544;CG18659;CG2765;CG30154;CG31710;CG34417;CG4101;CG4199;CG5835;CG5953;CG6051;CG7546;CG9328;CG9801;Chd64;Chmp1;CHMP2B;cindr;dia;Diap1;E(spl)mbeta-HLH;Fas1;GAPcenA;Gli;hebe;hid;hppy;Hr39;Hr4;ifc;insc;Jra;Lac;Lapsyn;Mlc-c;pcs;prominin-like;Ptp99A;puc;Rab30;Rab8;Rgl;RhoGAP15B;RhoGDI;RhoU;rpr;Sara;sky;Socs44A;spict;Spn5…
5kbUpTx	Jra_w005	cisbp__M6230	7.44	0.122	Jra	*	kay (inferredBy_Orthology).	Jra; cnc; mor (inferredBy_MotifSimilarity_n_Orthology).	72	3069	Act5C;betaTub97EF;CAP;CG10098;CG10527;CG11426;CG11658;CG13255;CG13314;CG15611;CG17544;CG18659;CG2765;CG31710;CG34417;CG4101;CG4199;CG5835;CG5953;CG6051;CG7546;CG9328;CG9801;Chd64;Chmp1;CHMP2B;cindr;Diap1;E(spl)mbeta-HLH;Fas1;Gli;hebe;hid;hppy;Hr39;Hr4;ifc;insc;Jra;Lac;Lapsyn;Mlc-c;pcs;prominin-like;Ptp99A;puc;Rab30;Rab8;Rgl;RhoGAP15B;RhoGDI;RhoU;rpr;Sara;sky;Smg6;Socs44A;spict;Spn55B;sqh;Swip-1;S…
5kbUpTx	Jra_w005	cisbp__M6038	7.42	0.122	Jra	*		kay (inferredBy_MotifSimilarity). Jra; cnc (inferredBy_MotifSimilarity_n_Orthology).	87	4964	Act5C;AMPdeam;be;betaTub97EF;CAP;CG10098;CG10527;CG10916;CG11426;CG11658;CG13255;CG13314;CG18659;CG2765;CG31710;CG34417;CG4101;CG4199;CG5835;CG5953;CG6051;CG6218;CG7546;CG9328;CG9801;Chd64;Chmp1;CHMP2B;cindr;dia;Diap1;E(spl)mbeta-HLH;Fas1;GAPcenA;GlcAT-S;Gli;Graf;hebe;hid;hppy;Hr39;Hr4;ifc;insc;Jra;Klp64D;Lac;Lapsyn;lqf;Mlc-c;moody;Nep2;pcs;prominin-like;Ptp99A;puc;Rab30;Rab8;Rgl;RhoGAP15B;RhoGAP…
5kbUpTx	Jra_w005	cisbp__M5050	7.41	0.122	Jra	**	Jra (directAnnotation).	kay (inferredBy_MotifSimilarity).	71	2870	Act5C;betaTub97EF;CAP;CG10098;CG10527;CG11426;CG13255;CG13314;CG18659;CG2765;CG30154;CG31710;CG34417;CG4101;CG4199;CG5835;CG5953;CG6051;CG7546;CG9328;CG9801;Chd64;Chmp1;CHMP2B;cindr;dia;Diap1;E(spl)mbeta-HLH;Fas1;GAPcenA;Gli;hebe;hid;Hr39;Hr4;ifc;insc;Jra;Klp64D;Lac;Lapsyn;lqf;Mlc-c;moody;pcs;prominin-like;Ptp99A;puc;Rab30;Rab8;Rgl;RhoGAP15B;RhoGDI;Rok;rpr;sky;Socs44A;Spn55B;sqh;Swip-1;Syx7;Traf4…
5kbUpTx	Jra_w005	taipale__Jdp2_DBD_ATGASTCAT_repr	7.35	0.121	Jra	*		kay (inferredBy_MotifSimilarity). Jra; cnc (inferredBy_MotifSimilarity_n_Orthology).	90	4964	Act5C;AMPdeam;be;betaTub97EF;CAP;CG10098;CG10527;CG10916;CG11426;CG11658;CG13255;CG13314;CG15611;CG1572;CG18659;CG2765;CG34194;CG34417;CG4101;CG4199;CG5835;CG5953;CG6051;CG6218;CG7546;CG9328;CG9801;Chd64;Chmp1;CHMP2B;cindr;dia;Diap1;E(spl)mbeta-HLH;Fas1;GAPcenA;GATAd;GlcAT-S;Gli;Graf;hebe;hid;hppy;Hr39;Hr4;ifc;insc;Jra;Klp64D;Lac;Lapsyn;lqf;Mlc-c;moody;Nep2;pcs;prominin-like;Ptp99A;puc;Rab30;Rab8…
5kbUpTx	Jra_w005	hocomoco__FOSL2_MOUSE.H10MO.A	7.32	0.121	Jra	*	kay (inferredBy_Orthology).	Jra; cnc; mor (inferredBy_MotifSimilarity_n_Orthology).	77	3733	Act5C;AMPdeam;betaTub97EF;CAP;CG10098;CG10527;CG10916;CG11426;CG11658;CG13255;CG13314;CG15611;CG17544;CG18659;CG2765;CG31710;CG34417;CG4101;CG4199;CG5835;CG5953;CG6051;CG7546;CG9328;CG9801;Chd64;Chmp1;CHMP2B;cindr;dia;Diap1;E(spl)mbeta-HLH;Fas1;GlcAT-S;Gli;hebe;hid;hppy;Hr39;Hr4;ifc;insc;Jra;Lac;Lapsyn;Mlc-c;pcs;prominin-like;Ptp99A;puc;Rab30;Rab8;Rgl;RhoGAP15B;RhoGDI;RhoU;rpr;Sara;sky;Smg6;Socs4…
5kbUpTx	Jra_w005	hocomoco__FOSL1_MOUSE.H10MO.C	7.3	0.12	Jra	*	kay (inferredBy_Orthology).	Jra (inferredBy_MotifSimilarity). mor (inferredBy_MotifSimilarity_n_Orthology).	71	2866	Act5C;betaTub97EF;CAP;CG10098;CG10527;CG11426;CG11658;CG13255;CG13314;CG15611;CG17544;CG18659;CG2765;CG31710;CG34417;CG4101;CG4199;CG5835;CG5953;CG6051;CG7546;CG9328;CG9801;Chd64;Chmp1;CHMP2B;cindr;Diap1;E(spl)mbeta-HLH;Fas1;GAPcenA;Gli;hebe;hid;Hr39;Hr4;ifc;insc;Jra;Lac;Lapsyn;Mlc-c;pcs;prominin-like;Ptp99A;puc;Rab30;Rab8;Rgl;RhoGAP15B;RhoGDI;RhoU;rpr;Sara;sky;Socs44A;spict;Spn55B;sqh;Swip-1;Syx…
5kbUpTx	Jra_w005	cisbp__M6317	7.29	0.12	Jra	**	Jra (inferredBy_Orthology).	kay; mor (inferredBy_MotifSimilarity_n_Orthology).	63	2481	Act5C;betaTub97EF;CAP;CG10098;CG10527;CG11426;CG13255;CG13314;CG17544;CG18659;CG2765;CG31710;CG34417;CG4101;CG5835;CG5953;CG6051;CG7546;CG9328;CG9801;Chd64;Chmp1;CHMP2B;cindr;Diap1;E(spl)mbeta-HLH;Fas1;GAPcenA;hebe;hid;Hr39;Hr4;ifc;insc;Jra;Lac;Lapsyn;Mlc-c;moody;pcs;Ptp99A;puc;Rab30;Rab8;Rgl;RhoGAP15B;RhoGDI;RhoU;rpr;sky;Socs44A;spict;sqh;Swip-1;Syx7;Traf4;Tsp42Ec;vari;Vps2;Vta1;WASp;Xrp1;Zasp52
5kbUpTx	Jra_w005	hocomoco__FOSB_HUMAN.H10MO.C	7.26	0.12	Jra	*	kay (inferredBy_Orthology).	Jra (inferredBy_MotifSimilarity). cnc; mor (inferredBy_MotifSimilarity_n_Orthology).	76	3142	Act5C;betaTub97EF;CAP;CG10098;CG10527;CG10916;CG11426;CG11658;CG13255;CG13314;CG15611;CG17544;CG18659;CG2765;CG30154;CG31710;CG34417;CG4101;CG4199;CG5835;CG5953;CG6051;CG7546;CG9328;CG9801;Chd64;Chmp1;CHMP2B;cindr;dia;Diap1;E(spl)mbeta-HLH;Fas1;GAPcenA;Gli;hebe;hid;hppy;Hr39;Hr4;ifc;insc;Jra;Lac;Lapsyn;Mlc-c;pcs;prominin-like;Ptp99A;puc;Rab30;Rab8;Rgl;RhoGAP15B;RhoGDI;RhoU;rpr;Sara;sky;Socs44A;sp…
5kbUpTx	Jra_w005	cisbp__M4570	7.25	0.12	Jra	**	Jra (inferredBy_Orthology).	cnc; kay; mor (inferredBy_MotifSimilarity_n_Orthology).	70	2866	Act5C;betaTub97EF;CAP;CG10098;CG10527;CG10916;CG11426;CG13314;CG18659;CG2765;CG30154;CG31710;CG34417;CG4101;CG4199;CG5835;CG5953;CG6051;CG7546;CG9328;Chd64;CHMP2B;cindr;dia;Diap1;E(spl)mbeta-HLH;Fas1;GlcAT-S;Gli;hebe;hid;hppy;Hr39;Hr4;ifc;insc;Jra;Lac;Lapsyn;Mlc-c;pcs;prominin-like;Ptp99A;puc;Rab30;Rab8;Rgl;RhoGAP15B;RhoGAP68F;RhoGDI;rpr;Sara;sky;Socs44A;spict;Spn55B;sqh;Swip-1;Syx7;Traf4;Tre1;Ts…
5kbUpTx	Jra_w005	cisbp__M5659	7.22	0.119	Jra	*	cnc (inferredBy_Orthology).	Jra; kay (inferredBy_MotifSimilarity_n_Orthology).	73	3952	AMPdeam;be;betaTub97EF;CAP;CG10098;CG10527;CG10916;CG11426;CG11658;CG13314;CG18659;CG2765;CG34417;CG4101;CG4199;CG5835;CG5953;CG6051;CG7546;CG9328;CG9801;Chd64;CHMP2B;cindr;dia;Diap1;E(spl)mbeta-HLH;Fas1;GAPcenA;GATAd;GlcAT-S;Gli;hebe;hid;hppy;Hr39;Hr4;ifc;insc;Jra;Klp64D;Lac;Lapsyn;lqf;Mlc-c;moody;pcs;prominin-like;Ptp99A;puc;Rab30;Rab8;Rgl;RhoGAP15B;RhoU;Rok;rpr;sky;Smg6;Socs44A;spict;Spn55B;sq…
5kbUpTx	Jra_w005	cisbp__M5589	7.17	0.119	Jra	*		kay (inferredBy_MotifSimilarity). Jra; cnc (inferredBy_MotifSimilarity_n_Orthology).	77	4187	betaTub97EF;CAP;CG10098;CG10527;CG10916;CG11426;CG11658;CG13314;CG18659;CG2765;CG34417;CG4101;CG4199;CG5835;CG5953;CG6051;CG7546;CG9328;Chd64;Chmp1;CHMP2B;cindr;dia;Diap1;E(spl)mbeta-HLH;Fas1;GAPcenA;GlcAT-S;Gli;hebe;hid;hppy;Hr39;Hr4;ifc;insc;Jra;Klp64D;Lac;Lapsyn;lqf;Mlc-c;moody;Nep2;pcs;prominin-like;Ptp99A;puc;Rab30;Rab8;Rgl;RhoGAP15B;RhoGAP68F;RhoGDI;RhoU;Rok;rpr;Sara;sky;Smg6;Socs44A;spict;…
5kbUpTx	Jra_w005	cisbp__M4684	7.12	0.118	Jra	*		Jra; kay (inferredBy_MotifSimilarity). cnc (inferredBy_MotifSimilarity_n_Orthology).	70	2945	CAP;CG10098;CG10527;CG10916;CG11426;CG11658;CG13314;CG18659;CG2765;CG31710;CG34417;CG4101;CG5835;CG5953;CG6051;CG7546;CG9328;Chd64;Chmp1;CHMP2B;cindr;dia;Diap1;E(spl)mbeta-HLH;Fas1;GAPcenA;GlcAT-S;Gli;hebe;hid;hppy;Hr39;Hr4;ifc;insc;Jra;Lac;Lapsyn;Mlc-c;pcs;prominin-like;Ptp99A;puc;Rab30;Rab8;Rgl;RhoGAP15B;RhoGDI;RhoU;rpr;Sara;sky;Smg6;Socs44A;Spn55B;sqh;Swip-1;Syx7;Traf4;Tre1;Tsp42Ec;Tsp42Ee;Tsp…
5kbUpTx	Jra_w005	taipale__NFE2_DBD_NATGASTCATN	7.1	0.118	Jra	*	cnc (inferredBy_Orthology).	Jra; kay (inferredBy_MotifSimilarity_n_Orthology).	72	3460	AMPdeam;be;CAP;CG10098;CG10527;CG10916;CG11426;CG11658;CG13314;CG18659;CG2765;CG31710;CG34417;CG4101;CG4199;CG5835;CG5953;CG6051;CG7546;CG9328;CG9801;Chd64;CHMP2B;cindr;dia;Diap1;E(spl)mbeta-HLH;Fas1;GAPcenA;GATAd;GlcAT-S;Gli;hebe;hid;hppy;Hr39;Hr4;insc;Jra;Klp64D;Lac;Lapsyn;Mlc-c;moody;prominin-like;Ptp99A;puc;Rab30;Rab8;Rgl;RhoGAP15B;RhoU;rpr;sky;Smg6;Socs44A;spict;Spn55B;sqh;step;Swip-1;Syx7;T…
5kbUpTx	Jra_w005	yetfasco__YER064C_2094	7.02	0.117	Jra	*		Jra; kay (inferredBy_MotifSimilarity). cnc (inferredBy_MotifSimilarity_n_Orthology).	64	2722	Act5C;betaTub97EF;CAP;CG10098;CG10527;CG11426;CG13255;CG13314;CG18659;CG2765;CG31710;CG34417;CG4101;CG4199;CG5835;CG5953;CG6051;CG7546;CG9328;CG9801;Chd64;CHMP2B;cindr;Diap1;E(spl)mbeta-HLH;Fas1;GAPcenA;hebe;hid;Hr39;Hr4;ifc;insc;Jra;Klp64D;Lac;Lapsyn;Mlc-c;pcs;prominin-like;Ptp99A;puc;Rab30;Rab8;Rgl;RhoGAP15B;RhoU;rpr;sky;Socs44A;Spn55B;sqh;Swip-1;Syx7;Traf4;Tre1;Tsp42Ec;Tsp42Ef;vari;Vps2;Vta1;W…
5kbUpTx	Jra_w005	taipale__JDP2_full_ATGASTCAT	6.99	0.116	Jra	*		kay (inferredBy_MotifSimilarity). Jra; cnc (inferredBy_MotifSimilarity_n_Orthology).	71	3142	betaTub97EF;CAP;CG10098;CG10527;CG11426;CG11658;CG13314;CG18659;CG2765;CG34417;CG4101;CG5835;CG5953;CG6051;CG7546;CG9328;Chd64;Chmp1;CHMP2B;cindr;dia;Diap1;E(spl)mbeta-HLH;Fas1;GAPcenA;GlcAT-S;Gli;hebe;hid;hppy;Hr39;Hr4;ifc;insc;Jra;Klp64D;Lac;Lapsyn;lqf;Mlc-c;moody;Nep2;pcs;prominin-like;Ptp99A;puc;Rab30;Rab8;Rgl;RhoGAP15B;RhoGDI;RhoU;Rok;rpr;Sara;sky;Smg6;Socs44A;Spn55B;sqh;Swip-1;Syx7;Traf4;Tr…
5kbUpTx	Jra_w005	yetfasco__YEL009C_1363	6.97	0.116	Jra	*		Jra; kay (inferredBy_MotifSimilarity). NFAT; cnc; maf-S; tj (inferredBy_MotifSimilarity_n_Orthology).	78	4221	Act5C;betaTub97EF;CAP;CG10098;CG10527;CG10916;CG11426;CG11658;CG13255;CG13314;CG15611;CG17544;CG18659;CG2765;CG30154;CG31710;CG34194;CG34417;CG4101;CG4199;CG5835;CG5953;CG6051;CG6218;CG7546;CG9328;CG9801;Chd64;cindr;dia;Diap1;E(spl)mbeta-HLH;Fas1;GAPcenA;GATAd;GlcAT-S;Gli;hebe;hid;hppy;Hr39;Hr4;ifc;insc;Jra;Klp64D;Lac;Lapsyn;Mlc-c;pcs;prominin-like;Ptp99A;puc;Rab30;Rab8;Rgl;RhoGAP15B;RhoGDI;RhoU;…
5kbUpTx	Jra_w005	cisbp__M4506	6.96	0.116	Jra	**	Jra (inferredBy_Orthology).	kay (inferredBy_MotifSimilarity). cnc; mor (inferredBy_MotifSimilarity_n_Orthology).	86	4792	Act5C;AMPdeam;be;betaTub97EF;CAP;CG10098;CG10527;CG10916;CG11426;CG11658;CG13255;CG13314;CG15611;CG1572;CG17544;CG18659;CG2765;CG30154;CG31710;CG34417;CG4101;CG4199;CG5835;CG5953;CG6051;CG7546;CG9328;CG9801;Chd64;Chmp1;CHMP2B;cindr;dia;Diap1;E(spl)mbeta-HLH;Fas1;GlcAT-S;Gli;hebe;hid;hppy;Hr39;Hr4;ifc;insc;Jra;Klp64D;Lac;Lapsyn;lqf;Mlc-c;moody;pcs;prominin-like;Ptp99A;puc;Rab30;Rab8;Rgl;RhoGAP15B;…
5kbUpTx	Jra_w005	transfac_public__M00490	6.91	0.115	Jra	*	cnc (inferredBy_Orthology).	Jra; kay (inferredBy_MotifSimilarity_n_Orthology).	58	2456	Act5C;betaTub97EF;CAP;CG10098;CG10527;CG10916;CG11426;CG13314;CG18659;CG2765;CG31710;CG34417;CG4101;CG5835;CG5953;CG6051;CG7546;CG9328;CG9801;Chd64;cindr;Diap1;E(spl)mbeta-HLH;Fas1;GAPcenA;hebe;hid;hppy;Hr39;Hr4;ifc;insc;Jra;Lac;Lapsyn;Mlc-c;pcs;prominin-like;puc;Rab30;Rab8;Rgl;RhoGAP15B;RhoGAP68F;RhoGDI;rpr;Smg6;Socs44A;Spn55B;sqh;Swip-1;Traf4;Tre1;vari;Vps2;Vta1;Xrp1;Zasp52
5kbUpTx	Jra_w005	cisbp__M4619	6.89	0.115	Jra	*	kay (inferredBy_Orthology).	Jra (inferredBy_MotifSimilarity). mor (inferredBy_MotifSimilarity_n_Orthology).	80	3422	Act5C;betaTub97EF;CAP;CG10098;CG10527;CG10916;CG11426;CG13255;CG13314;CG15611;CG17544;CG18659;CG2765;CG30154;CG31710;CG34417;CG4101;CG4199;CG5835;CG5953;CG6051;CG7546;CG9328;CG9801;Chd64;Chmp1;CHMP2B;cindr;dia;Diap1;E(spl)mbeta-HLH;Fas1;GAPcenA;GlcAT-S;Gli;hebe;hid;Hr39;Hr4;ifc;insc;Jra;Klp64D;Lac;Lapsyn;Mlc-c;pcs;prominin-like;Ptp99A;puc;Rab30;Rab8;Rgl;RhoGAP15B;RhoGDI;RhoU;Rok;rpr;Sara;sky;Smg6…
5kbUpTx	Jra_w005	hocomoco__JUNB_MOUSE.H10MO.B	6.85	0.114	Jra	**	Jra (inferredBy_Orthology).	kay; mor (inferredBy_MotifSimilarity_n_Orthology).	68	2945	Act5C;betaTub97EF;CAP;CG10098;CG10527;CG11426;CG11658;CG13255;CG13314;CG15611;CG17544;CG18659;CG2765;CG31710;CG34417;CG4101;CG5835;CG5953;CG6051;CG7546;CG9328;CG9801;Chd64;Chmp1;CHMP2B;cindr;Diap1;E(spl)mbeta-HLH;Fas1;GAPcenA;Gli;hebe;hid;Hr39;Hr4;ifc;insc;Jra;Lac;Lapsyn;Mlc-c;moody;pcs;Ptp99A;puc;Rab30;Rab8;Rgl;RhoGAP15B;RhoGAP68F;RhoGDI;RhoU;rpr;sky;Socs44A;spict;Spn55B;sqh;Swip-1;Syx7;Traf4;Ts…
5kbUpTx	Jra_w005	cisbp__M5587	6.84	0.114	Jra	*		Jra; kay (inferredBy_MotifSimilarity). cnc (inferredBy_MotifSimilarity_n_Orthology).	84	4964	Act5C;AMPdeam;be;betaTub97EF;CAP;CG10098;CG10527;CG10916;CG11426;CG11658;CG13255;CG13314;CG18659;CG2765;CG34194;CG34417;CG4101;CG4199;CG5835;CG5953;CG6051;CG6218;CG7546;CG9328;CG9801;Chd64;Chmp1;CHMP2B;cindr;Diap1;E(spl)mbeta-HLH;Fas1;GAPcenA;GlcAT-S;Gli;Graf;hebe;hid;hppy;Hr39;Hr4;ifc;insc;Jra;Klp64D;Lac;Lapsyn;lqf;Mlc-c;moody;Nep2;pcs;prominin-like;Ptp99A;puc;Rab30;Rab8;Rgl;RhoGAP15B;RhoGAP68F;…
5kbUpTx	Jra_w005	cisbp__M4565	6.83	0.114	Jra	*	kay (inferredBy_Orthology).	Jra (inferredBy_MotifSimilarity).	70	2637	Act5C;betaTub97EF;CAP;CG10098;CG10527;CG10916;CG11426;CG13255;CG13314;CG18659;CG2765;CG31710;CG34417;CG4101;CG4199;CG5835;CG5953;CG6051;CG7546;CG9328;CG9801;Chd64;CHMP2B;cindr;dia;Diap1;E(spl)mbeta-HLH;Fas1;GAPcenA;Gli;hebe;hid;hppy;Hr39;Hr4;ifc;insc;Jra;Lac;Lapsyn;Mlc-c;pcs;prominin-like;Ptp99A;puc;Rab30;Rab8;Rgl;RhoGAP15B;RhoGDI;rpr;Sara;sky;Socs44A;spict;Spn55B;sqh;Swip-1;Syx7;Traf4;Tre1;Tsp42…
5kbUpTx	Jra_w005	taipale__JDP2_DBD_ATGASTCAT	6.83	0.114	Jra	*		Jra; kay (inferredBy_MotifSimilarity). cnc (inferredBy_MotifSimilarity_n_Orthology).	85	4971	Act5C;AMPdeam;be;betaTub97EF;CAP;CG10098;CG10527;CG10916;CG11426;CG11658;CG13255;CG13314;CG18659;CG2765;CG34194;CG34417;CG4101;CG4199;CG5835;CG5953;CG6051;CG6218;CG7546;CG9328;CG9801;Chd64;Chmp1;CHMP2B;cindr;dia;Diap1;E(spl)mbeta-HLH;Fas1;GAPcenA;GlcAT-S;Gli;Graf;hebe;hid;hppy;Hr39;Hr4;ifc;insc;Jra;Klp64D;Lac;Lapsyn;lqf;Mlc-c;moody;Nep2;pcs;prominin-like;Ptp99A;puc;Rab30;Rab8;Rgl;RhoGAP15B;RhoGDI…
5kbUpTx	Jra_w005	transfac_public__M00038	6.82	0.114	Jra	*		Jra; kay; mor (inferredBy_MotifSimilarity_n_Orthology).	82	4625	Act5C;AMPdeam;be;betaTub97EF;CAP;CG10098;CG10527;CG10916;CG11426;CG11658;CG13255;CG13314;CG15611;CG1572;CG17544;CG18659;CG2765;CG31710;CG34194;CG34417;CG4101;CG4199;CG5835;CG5953;CG6051;CG6218;CG7546;CG9328;CG9801;Chd64;cindr;dia;Diap1;E(spl)mbeta-HLH;Fas1;GAPcenA;Gli;hebe;Hex-A;hid;hppy;Hr39;Hr4;ifc;insc;Jra;Klp64D;Lac;Lapsyn;lqf;Mlc-c;moody;Nep2;pcs;prominin-like;Ptp99A;puc;Rab30;Rab8;Rgl;RhoGA…
5kbUpTx	Jra_w005	cisbp__M2980	6.8	0.114	Jra	*	cnc (inferredBy_Orthology).	Jra; kay (inferredBy_MotifSimilarity_n_Orthology).	56	2348	Act5C;betaTub97EF;CAP;CG10098;CG10527;CG10916;CG11426;CG13314;CG18659;CG2765;CG31710;CG34417;CG4101;CG5835;CG5953;CG6051;CG7546;CG9328;CG9801;Chd64;cindr;Diap1;E(spl)mbeta-HLH;Fas1;GAPcenA;hebe;hid;hppy;Hr39;Hr4;insc;Jra;Lac;Lapsyn;Mlc-c;pcs;prominin-like;puc;Rab30;Rab8;Rgl;RhoGAP15B;RhoGAP68F;RhoGDI;rpr;Smg6;Socs44A;Spn55B;sqh;Swip-1;Traf4;vari;Vps2;Vta1;Xrp1;Zasp52
5kbUpTx	Jra_w005	cisbp__M2290	6.78	0.113	Jra	**	Jra (inferredBy_Orthology).	kay (inferredBy_MotifSimilarity). NFAT; mor (inferredBy_MotifSimilarity_n_Orthology).	75	3072	Act5C;betaTub97EF;CAP;CG10098;CG10527;CG11426;CG13255;CG13314;CG17544;CG18659;CG2765;CG30154;CG31710;CG34417;CG4101;CG4199;CG5835;CG5953;CG6051;CG7546;CG9328;CG9801;Chd64;Chmp1;CHMP2B;cindr;dia;Diap1;E(spl)mbeta-HLH;Fas1;GAPcenA;Gli;hebe;hid;hppy;Hr39;Hr4;ifc;insc;Jra;Lac;Lapsyn;lqf;Mlc-c;moody;pcs;prominin-like;Ptp99A;puc;Rab30;Rab8;Rgl;RhoGAP15B;RhoGDI;RhoU;rpr;Sara;sky;Socs44A;spict;Spn55B;sqh…
5kbUpTx	Jra_w005	cisbp__M2279	6.76	0.113	Jra	*	kay (inferredBy_Orthology).	Jra; mor (inferredBy_MotifSimilarity_n_Orthology).	87	4187	Act5C;be;betaTub97EF;CAP;CG10098;CG10527;CG10916;CG11426;CG11658;CG13255;CG13314;CG15611;CG1572;CG17544;CG18659;CG2765;CG30154;CG31710;CG34417;CG4101;CG4199;CG5835;CG5953;CG6051;CG7546;CG9328;CG9801;Chd64;Chmp1;CHMP2B;cindr;dia;Diap1;E(spl)mbeta-HLH;Fas1;GAPcenA;GlcAT-S;Gli;hebe;hid;hppy;Hr39;Hr4;ifc;insc;Jra;Klp64D;Lac;Lapsyn;lqf;Mlc-c;moody;pcs;prominin-like;Ptp99A;puc;Rab30;Rab8;Rgl;RhoGAP15B;…
5kbUpTx	Jra_w005	cisbp__M4623	6.74	0.113	Jra	**	Jra (inferredBy_Orthology).	kay (inferredBy_MotifSimilarity). cnc (inferredBy_MotifSimilarity_n_Orthology).	86	4308	Act5C;AMPdeam;be;betaTub97EF;CAP;CG10098;CG10527;CG10916;CG11426;CG13255;CG13314;CG15611;CG1572;CG17544;CG18659;CG2765;CG30154;CG31710;CG34194;CG34417;CG4101;CG4199;CG5835;CG5953;CG6051;CG6218;CG7546;CG9328;CG9801;Chd64;CHMP2B;cindr;dia;Diap1;E(spl)mbeta-HLH;Fas1;GATAd;GlcAT-S;Gli;hebe;hid;hppy;Hr39;Hr4;ifc;insc;Jra;Klp64D;Lac;Lapsyn;lqf;Mlc-c;moody;pcs;prominin-like;Ptp99A;puc;Rab30;Rab8;Rgl;Rho…
5kbUpTx	Jra_w005	cisbp__M4530	6.71	0.113	Jra	*	kay (inferredBy_Orthology).	Jra (inferredBy_MotifSimilarity_n_Orthology).	87	4187	Act5C;AMPdeam;betaTub97EF;CAP;CG10098;CG10527;CG10916;CG11426;CG11658;CG13255;CG13314;CG15611;CG1572;CG17544;CG18659;CG2765;CG30154;CG31710;CG34194;CG34417;CG4101;CG4199;CG5835;CG5953;CG6051;CG7546;CG9328;CG9801;Chd64;Chmp1;CHMP2B;cindr;dia;Diap1;E(spl)mbeta-HLH;Fas1;GAPcenA;GlcAT-S;Gli;hebe;hid;hppy;Hr39;Hr4;ifc;insc;Jra;Klp64D;Lac;Lapsyn;lqf;Mlc-c;moody;pcs;prominin-like;Ptp99A;puc;Rab30;Rab8;R…
5kbUpTx	Jra_w005	hocomoco__JUN_HUMAN.H10MO.A	6.7	0.112	Jra	**	Jra (inferredBy_Orthology).	kay (inferredBy_MotifSimilarity). cnc; mor (inferredBy_MotifSimilarity_n_Orthology).	73	3071	Act5C;betaTub97EF;CAP;CG10098;CG10527;CG10916;CG11426;CG11658;CG13255;CG13314;CG17544;CG18659;CG2765;CG31710;CG34417;CG4101;CG5835;CG5953;CG6051;CG7546;CG9328;CG9801;Chd64;Chmp1;CHMP2B;cindr;dia;Diap1;E(spl)mbeta-HLH;Fas1;GAPcenA;Gli;hebe;hid;hppy;Hr39;Hr4;ifc;insc;Jra;Lac;Lapsyn;Mlc-c;moody;pcs;prominin-like;Ptp99A;puc;Rab30;Rab8;Rgl;RhoGAP15B;RhoGAP68F;RhoGDI;RhoU;rpr;Sara;sky;Socs44A;spict;Spn…
5kbUpTx	Jra_w005	jaspar__MA0477.1	6.67	0.112	Jra	*	kay (inferredBy_Orthology).	Jra; mor (inferredBy_MotifSimilarity_n_Orthology).	87	4082	Act5C;AMPdeam;be;betaTub97EF;CAP;CG10098;CG10527;CG10916;CG11426;CG11658;CG13255;CG13314;CG15611;CG1572;CG17544;CG18659;CG2765;CG30154;CG31710;CG34417;CG4101;CG4199;CG5835;CG5953;CG6051;CG7546;CG9328;CG9801;Chd64;Chmp1;CHMP2B;cindr;dia;Diap1;E(spl)mbeta-HLH;Fas1;GAPcenA;GATAd;GlcAT-S;Gli;hebe;hid;hppy;Hr39;Hr4;ifc;insc;Jra;Klp64D;Lac;Lapsyn;lqf;Mlc-c;moody;pcs;prominin-like;Ptp99A;puc;Rab30;Rab8;…
5kbUpTx	Jra_w005	cisbp__M4541	6.58	0.111	Jra	**	Jra (inferredBy_Orthology).	kay (inferredBy_MotifSimilarity).	67	2770	Act5C;betaTub97EF;CAP;CG10098;CG10527;CG11426;CG13314;CG18659;CG2765;CG34417;CG4101;CG4199;CG5835;CG5953;CG6051;CG7546;CG9328;CG9801;Chd64;Chmp1;CHMP2B;cindr;dia;Diap1;E(spl)mbeta-HLH;Fas1;Gli;hebe;hid;hppy;Hr39;Hr4;insc;Jra;Klp64D;Lac;Lapsyn;Mlc-c;pcs;prominin-like;Ptp99A;puc;Rab30;Rab8;Rgl;RhoGAP15B;RhoGDI;rpr;Sara;sky;Smg6;Socs44A;spict;Spn55B;sqh;Swip-1;Syx7;Traf4;Tre1;Tsp42Ec;Tsp42Ef;vari;Vp…
5kbUpTx	Jra_w005	transfac_pro__M04693	6.57	0.111	Jra	*	kay (inferredBy_Orthology).	Jra (inferredBy_MotifSimilarity). NFAT; cnc (inferredBy_MotifSimilarity_n_Orthology).	63	2378	CAP;CG10098;CG10527;CG11426;CG11658;CG13314;CG18659;CG2765;CG31710;CG34417;CG4101;CG5835;CG5953;CG6051;CG7546;CG9328;Chd64;Chmp1;CHMP2B;cindr;dia;Diap1;E(spl)mbeta-HLH;Fas1;GAPcenA;GlcAT-S;Gli;hebe;hid;hppy;Hr4;ifc;insc;Jra;Lac;Lapsyn;Mlc-c;pcs;prominin-like;Ptp99A;puc;Rab30;Rab8;Rgl;RhoGAP15B;RhoGDI;RhoU;rpr;Sara;sky;Socs44A;Spn55B;sqh;Swip-1;Syx7;Traf4;Tsp42Ee;Tsp42Ef;vari;vsg;Vta1;Xrp1;Zasp52
5kbUpTx	Jra_w005	cisbp__M4591	6.52	0.11	Jra	**	Jra (inferredBy_Orthology).	kay (inferredBy_MotifSimilarity). NFAT; mor (inferredBy_MotifSimilarity_n_Orthology).	76	3422	Act5C;betaTub97EF;CAP;CG10098;CG10527;CG10916;CG11426;CG13314;CG17544;CG18659;CG2765;CG30154;CG34417;CG4101;CG4199;CG5835;CG5953;CG6051;CG7546;CG9328;CG9801;Chd64;Chmp1;CHMP2B;cindr;dia;Diap1;E(spl)mbeta-HLH;Fas1;GAPcenA;Gli;hebe;hid;hppy;Hr39;Hr4;ifc;insc;Jra;Klp64D;Lac;Lapsyn;lqf;Mlc-c;moody;Nep2;pcs;prominin-like;Ptp99A;puc;Rab30;Rab8;Rgl;RhoGAP15B;RhoGDI;rpr;Sara;sky;Socs44A;spict;Spn55B;sqh;…
5kbUpTx	Jra_w005	cisbp__M6319	6.48	0.109	Jra	**	Jra (inferredBy_Orthology).	kay (inferredBy_MotifSimilarity). cnc; mor (inferredBy_MotifSimilarity_n_Orthology).	72	3030	Act5C;betaTub97EF;CAP;CG10098;CG10527;CG10916;CG11426;CG11658;CG13255;CG13314;CG17544;CG18659;CG2765;CG31710;CG34417;CG4101;CG5835;CG5953;CG6051;CG7546;CG9328;CG9801;Chd64;Chmp1;CHMP2B;cindr;dia;Diap1;E(spl)mbeta-HLH;Fas1;GAPcenA;Gli;hebe;hid;Hr39;Hr4;ifc;insc;Jra;Lac;Lapsyn;Mlc-c;moody;pcs;prominin-like;Ptp99A;puc;Rab30;Rab8;Rgl;RhoGAP15B;RhoGAP68F;RhoGDI;RhoU;rpr;Sara;sky;Socs44A;spict;Spn55B;s…
5kbUpTx	Jra_w005	neph__UW.Motif.0001	6.43	0.109	Jra	*		kay (inferredBy_MotifSimilarity). Jra; cnc (inferredBy_MotifSimilarity_n_Orthology).	67	2729	Act5C;betaTub97EF;CAP;CG10098;CG10527;CG11426;CG11658;CG13255;CG13314;CG17544;CG18659;CG2765;CG31710;CG34417;CG4101;CG4199;CG5835;CG5953;CG6051;CG7546;CG9328;CG9801;Chd64;Chmp1;CHMP2B;cindr;Diap1;E(spl)mbeta-HLH;Fas1;GAPcenA;GlcAT-S;hebe;hid;Hr39;Hr4;ifc;insc;Jra;Lac;Lapsyn;Mlc-c;moody;pcs;Ptp99A;puc;Rab30;Rab8;Rgl;RhoGAP15B;RhoGDI;RhoU;rpr;sky;Socs44A;Spn55B;sqh;Swip-1;Syx7;Traf4;Tre1;Tsp42Ec;Ts…
5kbUpTx	Jra_w005	cisbp__M2979	6.41	0.109	Jra	*	cnc (inferredBy_Orthology).	Jra (inferredBy_MotifSimilarity_n_Orthology).	85	4993	Act5C;AMPdeam;be;betaTub97EF;CAP;CG10098;CG10527;CG10660;CG10916;CG11426;CG11658;CG13314;CG15611;CG1572;CG17544;CG18659;CG2765;CG31710;CG34417;CG4101;CG4199;CG5835;CG5953;CG6051;CG6218;CG7546;CG9328;CG9801;Chd64;CHMP2B;cindr;dia;Diap1;E(spl)mbeta-HLH;Fas1;GlcAT-S;Gli;hebe;hid;hppy;Hr39;Hr4;ifc;insc;Jra;Klp64D;Lac;Lapsyn;lqf;Mlc-c;moody;pcs;prominin-like;Ptp99A;puc;Rab30;Rab8;Rgl;RhoGAP15B;RhoGDI;…
5kbUpTx	Jra_w005	cisbp__M2428	6.4	0.108	Jra	*		Jra; kay (inferredBy_MotifSimilarity_n_Orthology).	81	4187	Act5C;AMPdeam;be;betaTub97EF;CAP;CG10098;CG10527;CG10916;CG11426;CG11658;CG13255;CG13314;CG15611;CG1572;CG18659;CG2765;CG31710;CG34194;CG34417;CG4101;CG4199;CG5835;CG5953;CG6051;CG6218;CG7546;CG9328;CG9801;Chd64;cindr;dia;Diap1;E(spl)mbeta-HLH;Fas1;GAPcenA;GlcAT-S;Gli;hebe;Hex-A;hid;hppy;Hr39;Hr4;ifc;insc;Jra;Klp64D;Lac;Lapsyn;lqf;Mlc-c;moody;Nep2;pcs;prominin-like;Ptp99A;puc;Rab30;Rab8;Rgl;RhoGA…
5kbUpTx	Jra_w005	cisbp__M4607	6.39	0.108	Jra	*	kay (inferredBy_Orthology).	Jra (inferredBy_MotifSimilarity). cnc; maf-S (inferredBy_MotifSimilarity_n_Orthology).	82	4187	Act5C;AMPdeam;betaTub97EF;CAP;CG10098;CG10527;CG10916;CG11426;CG13255;CG13314;CG15611;CG1572;CG18659;CG2765;CG30154;CG31710;CG34417;CG4101;CG4199;CG5835;CG5953;CG6051;CG6218;CG7546;CG9328;CG9801;Chd64;CHMP2B;cindr;dia;Diap1;E(spl)mbeta-HLH;Fas1;GlcAT-S;Gli;hebe;hid;hppy;Hr39;Hr4;ifc;insc;Jra;Klp64D;Lac;Lapsyn;lqf;Mlc-c;pcs;prominin-like;Ptp99A;puc;Rab30;Rab8;Rgl;RhoGAP15B;RhoGAP68F;RhoGDI;RhoU;Ro…
5kbUpTx	Jra_w005	jaspar__MA0489.1	6.31	0.107	Jra	**	Jra (inferredBy_Orthology).	kay (inferredBy_MotifSimilarity). NFAT; mor (inferredBy_MotifSimilarity_n_Orthology).	71	2722	Act5C;betaTub97EF;CAP;CG10098;CG10527;CG11426;CG17544;CG18659;CG2765;CG30154;CG31710;CG34417;CG4101;CG4199;CG5835;CG5953;CG6051;CG7546;CG9328;CG9801;Chd64;Chmp1;CHMP2B;cindr;dia;Diap1;E(spl)mbeta-HLH;Fas1;GAPcenA;Gli;hebe;hid;Hr39;Hr4;ifc;insc;Jra;Lac;Lapsyn;lqf;Mlc-c;moody;pcs;prominin-like;Ptp99A;puc;Rab30;Rab8;Rgl;RhoGAP15B;RhoGDI;RhoU;rpr;Sara;sky;Socs44A;spict;Spn55B;sqh;Swip-1;Syx7;Traf4;Tr…
5kbUpTx	Jra_w005	transfac_pro__M04846	6.18	0.106	Jra	*		Jra; kay (inferredBy_MotifSimilarity).	65	4320	AMPdeam;be;betaTub97EF;CAP;CG10098;CG10527;CG11426;CG13314;CG18659;CG2765;CG34417;CG4101;CG4199;CG5835;CG5953;CG6051;CG6218;CG7546;CG9328;CG9801;Chd64;cindr;dia;Diap1;E(spl)mbeta-HLH;Fas1;GlcAT-S;hebe;Hex-A;hid;hppy;Hr39;Hr4;ifc;insc;Jra;Lac;Lapsyn;lqf;Mlc-c;pcs;prominin-like;Ptp99A;puc;Rab30;Rab8;Rgl;RhoGAP15B;RhoU;rpr;sky;Socs44A;Spn55B;sqh;Swip-1;Syx7;Traf4;Tre1;Tsp42Ef;vari;vsg;Vta1;WASp;Xrp1…
5kbUpTx	Jra_w005	cisbp__M2108	6.08	0.104	Jra	*		Jra; kay (inferredBy_MotifSimilarity_n_Orthology).	82	4625	Act5C;betaTub97EF;CAP;CG10098;CG10527;CG10660;CG10916;CG11426;CG11658;CG13255;CG13314;CG15611;CG18659;CG2765;CG34194;CG34417;CG4101;CG4199;CG5835;CG5953;CG6051;CG7546;CG9328;CG9801;Chd64;cindr;dia;Diap1;E(spl)mbeta-HLH;Fas1;GAPcenA;GlcAT-S;Gli;Graf;hebe;Hex-A;hid;hppy;Hr39;Hr4;ifc;insc;Jra;Klp64D;Lac;Lapsyn;lqf;Mlc-c;moody;pcs;prominin-like;Ptp99A;puc;Rab30;Rab8;Rgl;RhoGAP15B;RhoGDI;RhoU;Rok;rpr;…
5kbUpTx	Jra_w005	cisbp__M4526	6.01	0.103	Jra	*	mor (inferredBy_Orthology).	Jra; cnc; ewg; kay; maf-S; tj (inferredBy_MotifSimilarity_n_Orthology).	84	3733	Act5C;AMPdeam;be;betaTub97EF;CAP;CG10098;CG10527;CG10916;CG11426;CG13314;CG15611;CG1572;CG17544;CG18659;CG2765;CG30154;CG31710;CG34417;CG4101;CG4199;CG5835;CG5953;CG6051;CG7546;CG9328;CG9801;Chd64;Chmp1;CHMP2B;cindr;dia;Diap1;E(spl)mbeta-HLH;Fas1;GAPcenA;GATAd;Gli;hebe;hid;hppy;Hr39;Hr4;ifc;insc;Jra;Klp64D;Lac;Lapsyn;lqf;Mlc-c;moody;pcs;prominin-like;Ptp99A;puc;Rab30;Rab8;Rgl;RhoGAP15B;RhoGAP68F;…
5kbUpTx	Jra_w005	transfac_pro__M01555	6	0.103	Jra	*		Jra; kay (inferredBy_MotifSimilarity_n_Orthology).	81	4539	Act5C;betaTub97EF;CAP;CG10098;CG10527;CG10916;CG11426;CG11658;CG13255;CG13314;CG15611;CG18659;CG2765;CG31710;CG34194;CG34417;CG4101;CG4199;CG5835;CG5953;CG6051;CG7546;CG9328;CG9801;Chd64;cindr;dia;Diap1;E(spl)mbeta-HLH;Fas1;GAPcenA;GlcAT-S;Gli;Graf;hebe;hid;hppy;Hr39;Hr4;ifc;insc;Jra;Klp64D;Lac;Lapsyn;lqf;Mlc-c;moody;pcs;prominin-like;Ptp99A;puc;Rab30;Rab8;Rgl;RhoGAP15B;RhoGDI;RhoU;Rok;rpr;Sara;s…
5kbUpTx	Jra_w005	yetfasco__YIL056W_2091	5.99	0.103	Jra	*		Jra; kay (inferredBy_MotifSimilarity). cnc; mor (inferredBy_MotifSimilarity_n_Orthology).	70	2945	Act5C;betaTub97EF;CAP;CG10098;CG10527;CG10916;CG11426;CG13255;CG13314;CG15611;CG18659;CG2765;CG31710;CG34417;CG4101;CG4199;CG5835;CG5953;CG6051;CG7130;CG7546;CG9328;CG9801;Chd64;cindr;dia;Diap1;E(spl)mbeta-HLH;Fas1;GAPcenA;Gli;hebe;hid;hppy;Hr39;Hr4;ifc;insc;Jra;Lac;Lapsyn;Mlc-c;pcs;prominin-like;Ptp99A;puc;Rab30;Rab8;Rgl;RhoGAP15B;RhoGDI;RhoU;rpr;sky;Socs44A;spict;Spn55B;sqh;Swip-1;Syx7;Traf4;Tr…
5kbUpTx	Jra_w005	cisbp__M4625	5.96	0.103	Jra	**	Jra (inferredBy_Orthology).	kay (inferredBy_MotifSimilarity). mor (inferredBy_MotifSimilarity_n_Orthology).	81	4187	Act5C;AMPdeam;be;betaTub97EF;CAP;CG10098;CG10527;CG10916;CG11426;CG13255;CG13314;CG15611;CG1572;CG17544;CG18659;CG2765;CG31710;CG34417;CG4101;CG4199;CG5835;CG5953;CG6051;CG7546;CG9328;CG9801;Chd64;Chmp1;CHMP2B;cindr;dia;Diap1;E(spl)mbeta-HLH;Fas1;GlcAT-S;Gli;hebe;hid;hppy;Hr39;Hr4;ifc;insc;Jra;Klp64D;Lac;Lapsyn;lqf;Mlc-c;pcs;prominin-like;Ptp99A;puc;Rab30;Rab8;Rgl;RhoGAP15B;RhoGDI;RhoU;Rok;rpr;Sa…
5kbUpTx	Jra_w005	cisbp__M6228	5.94	0.102	Jra	*	kay (inferredBy_Orthology).	Jra (inferredBy_MotifSimilarity_n_Orthology).	52	1817	Act5C;betaTub97EF;CAP;CG10098;CG10527;CG11426;CG17544;CG18659;CG2765;CG31710;CG34417;CG4101;CG5835;CG5953;CG6051;CG7546;CG9328;CG9801;Chd64;cindr;Diap1;E(spl)mbeta-HLH;Fas1;GAPcenA;hebe;hid;Hr39;Hr4;insc;Jra;Lac;Lapsyn;Mlc-c;pcs;Ptp99A;puc;Rab30;Rgl;RhoGAP68F;RhoGDI;rpr;sky;Socs44A;sqh;Swip-1;Traf4;vari;Vps2;Vta1;Xrp1;Zasp52;ZnT63C
5kbUpTx	Jra_w005	jaspar__MA0303.1	5.93	0.102	Jra	*		Jra; kay (inferredBy_MotifSimilarity_n_Orthology).	78	4187	Act5C;betaTub97EF;CAP;CG10098;CG10527;CG10916;CG11426;CG11658;CG13255;CG13314;CG15611;CG18659;CG2765;CG34194;CG34417;CG4101;CG4199;CG5835;CG5953;CG6051;CG7546;CG9328;CG9801;Chd64;cindr;dia;Diap1;E(spl)mbeta-HLH;Fas1;GAPcenA;GlcAT-S;Gli;Graf;hebe;hid;hppy;Hr39;Hr4;ifc;insc;Jra;Klp64D;Lac;Lapsyn;lqf;Mlc-c;moody;pcs;prominin-like;Ptp99A;puc;Rab30;Rab8;Rgl;RhoGAP15B;RhoGDI;RhoU;Rok;rpr;sky;Smg6;Socs4…
5kbUpTx	Jra_w005	transfac_public__M00495	5.86	0.101	Jra	*	cnc (inferredBy_Orthology).	Jra (inferredBy_MotifSimilarity_n_Orthology).	74	4204	AMPdeam;betaTub97EF;CAP;CG10098;CG10527;CG10916;CG11426;CG11658;CG13314;CG15611;CG18659;CG2765;CG31710;CG34417;CG4101;CG4199;CG5835;CG5953;CG6051;CG7546;CG9328;CG9801;Chd64;CHMP2B;cindr;dia;Diap1;E(spl)mbeta-HLH;Fas1;Gli;hebe;hid;hppy;Hr39;Hr4;ifc;insc;Jra;Klp64D;Lac;Lapsyn;lqf;Mlc-c;moody;pcs;prominin-like;Ptp99A;puc;Rab30;Rab8;Rgl;RhoGAP15B;RhoGDI;RhoU;rpr;sky;Smg6;Socs44A;spict;Spn55B;sqh;step…
5kbUpTx	Jra_w005	cisbp__M0320	5.68	0.0989	Jra	**	Jra (inferredBy_Orthology).	kay (inferredBy_MotifSimilarity_n_Orthology).	71	4717	betaTub97EF;CAP;CG10098;CG10527;CG10660;CG11426;CG11658;CG13314;CG15611;CG1572;CG18659;CG34417;CG4101;CG5835;CG5953;CG6051;CG7546;CG9328;CG9427;Chd64;Chmp1;CHMP2B;cindr;dia;Diap1;E(spl)mbeta-HLH;Fas1;GlcAT-S;Gli;hebe;hid;hppy;Hr39;Hr4;ifc;insc;Jra;Klp64D;Lac;Lapsyn;Mlc-c;pcs;prominin-like;Ptp99A;puc;Rab30;Rab8;Rgl;RhoGAP15B;RhoGDI;RhoU;Rok;rpr;sky;Smg6;Socs44A;Spn55B;sqh;Swip-1;Syx7;Traf4;Tre1;Ts…
5kbUpTx	Jra_w005	hocomoco__BATF_HUMAN.H10MO.S	5.65	0.0986	Jra	*		Jra; kay (inferredBy_MotifSimilarity_n_Orthology).	87	4880	Act5C;AMPdeam;be;betaTub97EF;CAP;CG10098;CG10527;CG10916;CG11426;CG12883;CG13255;CG13314;CG15611;CG1572;CG17544;CG18659;CG2765;CG31710;CG34417;CG4101;CG4199;CG5835;CG5953;CG6051;CG6218;CG7546;CG9328;CG9801;Chd64;Chmp1;CHMP2B;cindr;dia;Diap1;E(spl)mbeta-HLH;Fas1;GAPcenA;GATAd;GlcAT-S;Gli;hebe;hid;hppy;Hr39;Hr4;ifc;insc;Jra;Klp64D;Lac;Lapsyn;lqf;Mlc-c;moody;pcs;prominin-like;Ptp99A;puc;Rab30;Rab8;R…
5kbUpTx	Jra_w005	homer__TGCTGAGTCA_Bach2	5.48	0.0963	Jra	*	cnc (inferredBy_Orthology).	Jra; kay; maf-S; tj (inferredBy_MotifSimilarity_n_Orthology).	80	4964	Act5C;AMPdeam;be;betaTub97EF;CAP;CG10098;CG10527;CG10660;CG11426;CG13255;CG13314;CG15611;CG1572;CG17544;CG18659;CG1882;CG2765;CG31710;CG34417;CG4101;CG4199;CG5835;CG5953;CG6051;CG7546;CG9328;CG9427;CG9801;Chd64;CHMP2B;cindr;Ctr1A;dia;Diap1;E(spl)mbeta-HLH;Fas1;GAPcenA;GATAd;Gli;hebe;hid;hppy;Hr39;Hr4;ifc;insc;Jra;Klp64D;Lac;Lapsyn;Mlc-c;pcs;prominin-like;Ptp99A;puc;Rab30;Rab8;Rgl;RhoGAP15B;RhoGAP…
5kbUpTx	Jra_w005	cisbp__M6158	5.44	0.0958	Jra	*		Jra; kay (inferredBy_MotifSimilarity_n_Orthology).	82	4364	Act5C;AMPdeam;betaTub97EF;CAP;CG10098;CG10527;CG10916;CG11426;CG12883;CG13255;CG13314;CG15611;CG1572;CG17544;CG18659;CG2765;CG31710;CG34417;CG4101;CG4199;CG5835;CG5953;CG6051;CG6218;CG7546;CG9328;CG9801;Chd64;Chmp1;CHMP2B;cindr;Diap1;E(spl)mbeta-HLH;Fas1;GAPcenA;GATAd;GlcAT-S;Gli;hebe;hid;hppy;Hr39;Hr4;ifc;insc;Jra;Klp64D;Lac;Lapsyn;lqf;Mlc-c;moody;pcs;prominin-like;Ptp99A;puc;Rab30;Rab8;Rgl;RhoG…
5kbUpTx	Jra_w005	homer__NATGASTCABNN_Fosl2	5.42	0.0956	Jra	*	kay (inferredBy_Orthology).	Jra (inferredBy_MotifSimilarity). cnc; mor (inferredBy_MotifSimilarity_n_Orthology).	70	3582	Act5C;betaTub97EF;CAP;CG10098;CG10527;CG10916;CG11426;CG13255;CG13314;CG17544;CG18659;CG2765;CG31710;CG34417;CG4101;CG4199;CG5835;CG5953;CG6051;CG7546;CG9328;CG9801;Chd64;CHMP2B;cindr;Diap1;E(spl)mbeta-HLH;Fas1;GAPcenA;Gli;hebe;hid;Hr39;Hr4;ifc;insc;Jra;Klp64D;Lac;Lapsyn;Mlc-c;moody;pcs;prominin-like;Ptp99A;puc;Rab30;Rab8;Rgl;RhoGAP15B;RhoGAP68F;RhoGDI;RhoU;rpr;sky;Socs44A;spict;Spn55B;sqh;Swip-1…
5kbUpTx	Jra_w005	swissregulon__hs__FOS_FOS_B_L1__JUN_B_D_.p2	5.38	0.095	Jra	**	Jra; kay (inferredBy_Orthology).	mor (inferredBy_MotifSimilarity_n_Orthology).	79	3500	Act5C;betaTub97EF;CAP;CG10098;CG10527;CG11426;CG11658;CG13255;CG13314;CG15611;CG17544;CG18659;CG2765;CG30154;CG31710;CG34194;CG34417;CG4101;CG4199;CG5835;CG5953;CG6051;CG7546;CG9328;CG9801;Chd64;Chmp1;CHMP2B;cindr;dia;Diap1;E(spl)mbeta-HLH;Fas1;GAPcenA;GlcAT-S;Gli;hebe;hid;hppy;Hr39;Hr4;ifc;insc;Jra;Lac;Lapsyn;Mlc-c;moody;pcs;prominin-like;Ptp99A;puc;Rab30;Rab8;Rgl;RhoGAP15B;RhoGDI;RhoU;rpr;Sara;…
5kbUpTx	Jra_w005	swissregulon__hs__BACH2.p2	5.27	0.0936	Jra	*	cnc (inferredBy_Orthology).	Jra; kay; mor (inferredBy_MotifSimilarity_n_Orthology).	85	4625	Act5C;AMPdeam;be;betaTub97EF;CAP;CG10098;CG10527;CG10916;CG11426;CG11658;CG13314;CG15611;CG1572;CG17544;CG18659;CG2765;CG30154;CG31710;CG34417;CG4101;CG4199;CG5835;CG5953;CG6051;CG6218;CG7546;CG9328;CG9801;Chd64;Chmp1;CHMP2B;cindr;dia;Diap1;E(spl)mbeta-HLH;Fas1;GlcAT-S;Gli;hebe;hid;hppy;Hr39;Hr4;ifc;insc;Jra;Klp64D;Lac;Lapsyn;Mlc-c;moody;pcs;prominin-like;Ptp99A;puc;Rab30;Rab8;Rgl;RhoGAP15B;RhoGA…
5kbUpTx	Jra_w005	hocomoco__FOSB_MOUSE.H10MO.C	5.18	0.0923	Jra	*	kay (inferredBy_Orthology).	Jra (inferredBy_MotifSimilarity_n_Orthology).	73	3914	Act5C;AMPdeam;be;betaTub97EF;CAP;CG10098;CG10527;CG10916;CG11426;CG11658;CG15611;CG17544;CG18659;CG2765;CG31710;CG34417;CG4101;CG4199;CG5835;CG5953;CG6051;CG7546;CG9328;CG9801;Chd64;Chmp1;CHMP2B;cindr;Diap1;E(spl)mbeta-HLH;Fas1;GAPcenA;hebe;hid;hppy;Hr39;Hr4;insc;Jra;Lac;Lapsyn;lqf;Mlc-c;moody;pcs;prominin-like;Ptp99A;puc;Rab30;Rab8;Rgl;RhoGAP15B;RhoGAP68F;RhoGDI;Rok;rpr;sky;Socs44A;Spn55B;sqh;Sw…
5kbUpTx	Jra_w005	yetfasco__YBL103C_1445	5.03	0.0904	Jra	*		Jra; kay (inferredBy_MotifSimilarity).	41	1551	betaTub97EF;CAP;CG10098;CG11426;CG13314;CG18659;CG2765;CG34417;CG4101;CG5835;CG5953;CG6051;CG7546;CG9328;Chd64;cindr;Diap1;Fas1;hebe;hid;Hr4;insc;Jra;Lac;Mlc-c;Ptp99A;puc;Rab8;Rgl;RhoGDI;rpr;sky;Socs44A;Spn55B;sqh;Swip-1;Traf4;Vps2;Vta1;Xrp1;Zasp52
5kbUpTx	Jra_w005	transfac_pro__M07400	4.98	0.0898	Jra	*		Jra; kay (inferredBy_MotifSimilarity_n_Orthology).	80	4192	Act5C;be;betaTub97EF;CAP;CG10098;CG10527;CG10660;CG10916;CG11426;CG11658;CG13255;CG13314;CG17544;CG18659;CG2765;CG31710;CG34417;CG4101;CG4199;CG5835;CG5953;CG6051;CG7546;CG9328;CG9801;Chd64;Chmp1;CHMP2B;cindr;dia;Diap1;E(spl)mbeta-HLH;Fas1;GAPcenA;GlcAT-S;Gli;hebe;hid;hppy;Hr39;Hr4;ifc;insc;Jra;Klp64D;Lac;Lapsyn;lqf;Mlc-c;moody;pcs;prominin-like;Ptp99A;puc;Rab30;Rab8;Rgl;RhoGAP15B;RhoGAP68F;RhoGD…
5kbUpTx	Jra_w005	hocomoco__SMRC1_HUMAN.H10MO.D	4.8	0.0873	Jra	*	mor (inferredBy_Orthology).	Jra; cnc; ewg; kay; maf-S; tj (inferredBy_MotifSimilarity_n_Orthology).	75	4569	Act5C;AMPdeam;betaTub97EF;CAP;CG10098;CG10527;CG10916;CG11426;CG13255;CG13314;CG15611;CG1572;CG17544;CG18659;CG2765;CG30154;CG31710;CG34417;CG4101;CG4199;CG5835;CG5953;CG6051;CG9328;CG9801;Chd64;cindr;dia;Diap1;E(spl)mbeta-HLH;Fas1;GlcAT-S;Gli;hebe;hid;hppy;Hr39;Hr4;ifc;insc;Jra;Klp64D;Lac;Lapsyn;Mlc-c;Nep2;pcs;prominin-like;Ptp99A;puc;Rab30;Rab8;Rgl;RhoGAP15B;RhoGDI;RhoU;Rok;rpr;sky;Socs44A;spic…
5kbUpTx	Jra_w005	hocomoco__SMRC1_MOUSE.H10MO.B	4.73	0.0864	Jra	*	mor (inferredBy_Orthology).	Jra; cnc; ewg; kay; maf-S; tj (inferredBy_MotifSimilarity_n_Orthology).	68	2637	Act5C;betaTub97EF;CAP;CG10098;CG10527;CG10916;CG11426;CG11658;CG13255;CG13314;CG15611;CG17544;CG18659;CG2765;CG31710;CG34417;CG4101;CG5835;CG5953;CG6051;CG7546;CG9328;Chd64;Chmp1;CHMP2B;cindr;dia;Diap1;E(spl)mbeta-HLH;Fas1;GAPcenA;Gli;hebe;hid;Hr39;Hr4;ifc;insc;Jra;Lac;Lapsyn;Mlc-c;moody;pcs;prominin-like;Ptp99A;puc;Rab30;Rab8;Rgl;RhoGAP15B;RhoGDI;RhoU;rpr;sky;Socs44A;spict;Spn55B;sqh;Swip-1;Syx7…
5kbUpTx	Jra_w005	transfac_pro__M03866	4.67	0.0857	Jra	**	Jra; kay (inferredBy_Orthology).	mor (inferredBy_MotifSimilarity_n_Orthology).	61	2378	Act5C;betaTub97EF;CAP;CG10098;CG10527;CG11426;CG11658;CG13255;CG13314;CG17544;CG18659;CG2765;CG31710;CG34417;CG4101;CG5835;CG5953;CG6051;CG7546;CG9328;CG9801;Chd64;Chmp1;cindr;Diap1;E(spl)mbeta-HLH;Fas1;GAPcenA;hebe;hid;Hr39;Hr4;ifc;insc;Jra;Lac;Lapsyn;Mlc-c;moody;pcs;Ptp99A;puc;Rab30;Rab8;Rgl;RhoGAP68F;RhoGDI;RhoU;rpr;sky;Socs44A;spict;Spn55B;sqh;Swip-1;Traf4;vari;Vta1;WASp;Xrp1;Zasp52
5kbUpTx	Jra_w005	cisbp__M6467	4.63	0.0852	Jra	*	mor (inferredBy_Orthology).	Jra; cnc; ewg; kay; maf-S; tj (inferredBy_MotifSimilarity_n_Orthology).	68	2579	Act5C;betaTub97EF;CAP;CG10098;CG10527;CG10916;CG11426;CG11658;CG13255;CG13314;CG15611;CG17544;CG18659;CG2765;CG31710;CG34417;CG4101;CG5835;CG5953;CG6051;CG7546;CG9328;Chd64;Chmp1;CHMP2B;cindr;dia;Diap1;E(spl)mbeta-HLH;Fas1;GAPcenA;Gli;hebe;hid;Hr39;Hr4;ifc;insc;Jra;Lac;Lapsyn;Mlc-c;moody;pcs;prominin-like;Ptp99A;puc;Rab30;Rab8;Rgl;RhoGAP15B;RhoGDI;RhoU;rpr;sky;Socs44A;spict;Spn55B;sqh;Swip-1;Syx7…
5kbUpTx	Jra_w005	transfac_pro__M03870	4.55	0.0841	Jra	*	kay (inferredBy_Orthology).	Jra (inferredBy_MotifSimilarity_n_Orthology).	65	3081	betaTub97EF;CAP;CG10098;CG10527;CG10660;CG10916;CG11426;CG13314;CG18659;CG2765;CG31710;CG34417;CG4101;CG4199;CG5835;CG5953;CG6051;CG9328;CG9801;Chd64;CHMP2B;cindr;Diap1;E(spl)mbeta-HLH;Fas1;Gli;hebe;hid;hppy;Hr39;Hr4;ifc;insc;Jra;Lac;Lapsyn;Mlc-c;moody;pcs;prominin-like;Ptp99A;puc;Rab30;Rab8;Rgl;RhoGAP15B;RhoGAP68F;RhoGDI;RhoU;rpr;sky;Smg6;Socs44A;Spn55B;sqh;Swip-1;Traf4;Tsp42Ec;vari;Vps2;vsg;Vta…
5kbUpTx	Jra_w005	transfac_pro__M01267	4.54	0.084	Jra	*	kay (inferredBy_Orthology).	Jra (inferredBy_MotifSimilarity_n_Orthology).	74	4187	Act5C;betaTub97EF;CAP;CG10098;CG10527;CG10916;CG11426;CG11658;CG13255;CG13314;CG15611;CG17544;CG18659;CG2765;CG31710;CG34417;CG4101;CG4199;CG5835;CG5953;CG6051;CG7546;CG9328;Chd64;Chmp1;CHMP2B;cindr;Diap1;E(spl)mbeta-HLH;Fas1;GAPcenA;GlcAT-S;Gli;hebe;hid;hppy;Hr39;Hr4;ifc;insc;Jra;Lac;Lapsyn;Mlc-c;moody;pcs;prominin-like;Ptp99A;puc;Rab30;Rab8;Rgl;RhoGAP15B;RhoGAP68F;RhoGDI;RhoU;rpr;sky;Socs44A;sp…
5kbUpTx	Jra_w005	transfac_public__M00517	4.49	0.0833	Jra	**	Jra; kay (inferredBy_Orthology).	cnc; maf-S; tj (inferredBy_MotifSimilarity_n_Orthology).	74	4187	Act5C;AMPdeam;betaTub97EF;CAP;CG10098;CG10527;CG10916;CG11426;CG13255;CG13314;CG15611;CG17544;CG18659;CG2765;CG31710;CG34417;CG4101;CG4199;CG5835;CG5953;CG6051;CG7546;CG9328;CG9801;Chd64;CHMP2B;cindr;Diap1;E(spl)mbeta-HLH;Fas1;GAPcenA;Gli;hebe;hid;hppy;Hr39;Hr4;ifc;insc;Jra;Klp64D;Lac;Lapsyn;Mlc-c;moody;pcs;prominin-like;Ptp99A;puc;Rab30;Rab8;Rgl;RhoGAP15B;RhoGAP68F;RhoGDI;RhoU;rpr;sky;Socs44A;sp…
5kbUpTx	Jra_w005	transfac_public__M00174	4.47	0.0831	Jra	**	Jra; kay (inferredBy_Orthology).	mor (inferredBy_MotifSimilarity_n_Orthology).	64	3422	betaTub97EF;CAP;CG10098;CG10527;CG10916;CG11426;CG13255;CG13314;CG17544;CG18659;CG2765;CG30154;CG31710;CG34417;CG4101;CG4199;CG5835;CG5953;CG6051;CG7546;CG9328;CG9801;Chd64;cindr;Diap1;E(spl)mbeta-HLH;Fas1;GAPcenA;hebe;hid;hppy;Hr39;Hr4;ifc;insc;Jra;Lac;Lapsyn;Mlc-c;moody;pcs;prominin-like;Ptp99A;puc;Rab30;Rab8;Rgl;RhoGDI;RhoU;rpr;sky;Socs44A;Spn55B;sqh;Swip-1;Traf4;Tre1;Tsp42Ec;Tsp42Ef;vari;Vta1…
5kbUpTx	Jra_w005	transfac_pro__M07600	4.41	0.0823	Jra	*	kay (inferredBy_Orthology).	Jra (inferredBy_MotifSimilarity_n_Orthology).	61	2798	Act5C;betaTub97EF;CAP;CG10527;CG10916;CG11426;CG13255;CG13314;CG15611;CG17544;CG18659;CG2765;CG31710;CG34417;CG4101;CG5835;CG5953;CG6051;CG7546;CG9328;CG9801;Chd64;cindr;Diap1;E(spl)mbeta-HLH;Fas1;GAPcenA;hebe;hid;hppy;Hr39;Hr4;ifc;insc;Jra;Lac;Lapsyn;Mlc-c;moody;pcs;Ptp99A;puc;Rab30;Rab8;Rgl;RhoGAP68F;RhoGDI;RhoU;rpr;sky;Socs44A;spict;sqh;Swip-1;Traf4;Tsp42Ec;vari;Vta1;WASp;Xrp1;Zasp52
5kbUpTx	Jra_w005	transfac_public__M00037	4.29	0.0807	Jra	*	cnc; maf-S (inferredBy_Orthology).	Jra; ewg; kay; tj (inferredBy_MotifSimilarity_n_Orthology).	33	1336	CAP;CG10527;CG31710;CG34417;CG4101;CG5835;CG6051;CG9328;Chd64;cindr;Diap1;hebe;hid;ifc;insc;Jra;Lac;Lapsyn;pcs;prominin-like;Ptp99A;puc;Rab30;Rgl;RhoU;rpr;sky;Socs44A;sqh;Swip-1;Traf4;vari;Zasp52
[truncated: 1,026 more rows]
